# Supplementary material for: RNA-Seq Reveals an Integrated Immune Response in Nucleated Erythrocytes
Source: PubMed Central journal article supplement (PMC3203173; doi:10.1371/journal.pone.0026998), 2011-10-27

**a**

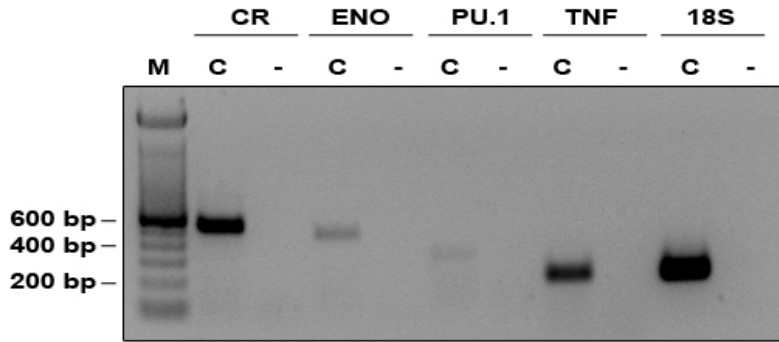

**b**

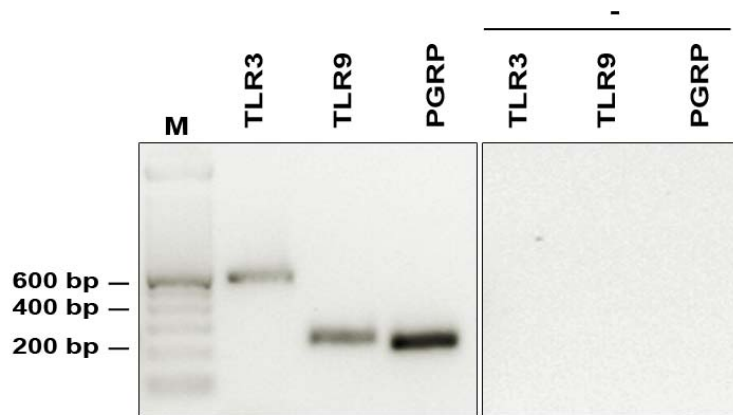

Supplement: pone.0026998.s002.pdf [file pone.0026998.s002.pdf]
