# Supplementary material for: RNA-Seq Reveals an Integrated Immune Response in Nucleated Erythrocytes
Source: PLoS One. 2011 Oct 27;6(10):e26998. doi: 10.1371/journal.pone.0026998 (PMC3203173; doi:10.1371/journal.pone.0026998)
Supplement: Table S1 — All genes that were regulated at 12 h 2 fold or greater in tEC control and poly (I∶C) libraries determined by RNA-seq analysis. ABI SOLiD sequences were mapped against the rainbow trout SIGENAE contigs (http://public-contigbrowser.sigenae.org:9090/Oncorhynchus_mykiss/index.html) and the RPKM expression values were determined. Table provides number of mapped reads/contig, expression levels, difference and fold change in RPKM between control and poly (I∶C) libraries. SIGENAE contigs were aligned against the Gene Ontology Database (version GO.200801) and the top blast hit (accession number and description) is provided for each contig. (XLS) [file pone.0026998.s005.xls]

## Sheet: Control - Table 1
SIGENAE Feature ID	# of Reads	control Expression values	polyIC Expression values	Expresssion Difference	Fold Change (Control/PolyIC)	Blast Accession #of best hit	Blast Gene Description of best hit
CA370684.p.om.7	19	1.49	0.07	1.42	21.2857	gb|ACH70612.1|	malate dehydrogenase 1 [Salmo salar]
CU073362.p.om.7	18	0.72	0.04	0.68	18	ref|NP_001167134.1|	Hormone-sensitive lipase [Salmo salar]_x0001_gb|ACN10911.1| Hormone-sensitive lipase [Salmo salar]
BX301367.p.om.7	15	0.85	0.05	0.79	17	ref|NP_001133198.1|	malate dehydrogenase 2-2, NAD (mitochondrial) [Salmo salar]_x0001_gb|ACH70949.1| malate dehydrogenase 2-2, NAD (mitochondrial) [Salmo salar]_x0001_gb|ACI68017.1| Malate dehydrogenase, mitochondrial precursor [Salmo salar]
CA353466.p.om.7	47	4.51	0.27	4.23	16.7037	gb|ACO07765.1|	Ubiquitin-like protein FUBI [Oncorhynchus mykiss]
GE833328.p.om.7	14	1.08	0.07	1	15.4286	gb|ACI66528.1|	NADH dehydrogenase 1 alpha subcomplex subunit 7 [Salmo salar]
BX297822.p.om.7	56	3.23	0.22	3.01	14.6818	ref|NP_001134257.1|	Survival of motor neuron-related-splicing factor 30 [Salmo salar]_x0001_ref|NP_001154021.1| Survival of motor neuron-related-splicing factor 30 [Oncorhynchus mykiss]_x0001_gb|ACI66817.1| Survival of motor neuron-related-splicing factor 30 [Salmo salar]_x0001_gb|ACI68635.1| Survival of motor neuron-related-splicing factor 30 [Salmo salar]_x0001_gb|ACO07559.1| Survival of motor neuron-related-splic…
CU071293.p.om.7	14	0.56	0.04	0.52	14	gb|ACI69926.1|	Inorganic pyrophosphatase 2, mitochondrial precursor [Salmo salar]
BX308249.p.om.7	28	1.54	0.11	1.43	14	gb|EDL22763.1|	polynucleotide kinase 3'- phosphatase, isoform CRA_d [Mus musculus]
CR374987.p.om.7	14	0.84	0.06	0.79	14	ref|NP_001167039.1|	Arfaptin-1 [Salmo salar]_x0001_gb|ACN10528.1| Arfaptin-1 [Salmo salar]
BX087148.p.om.7	13	0.69	0.05	0.64	13.8	gb|AAD53036.1|AF115539_1	proteasome delta [Oncorhynchus mykiss]
CX033721.p.om.7	13	1.03	0.08	0.95	12.875	emb|CAK04045.1|	ubiquitin-like, containing PHD and RING finger domains, 1 [Danio rerio]
CX248531.p.om.7	11	0.84	0.07	0.76	12	ref|NP_001133970.1|	transient receptor potential cation channel subfamily V member 1 [Salmo salar]_x0001_gb|ACI34236.1| Transient receptor potential cation channel subfamily V member 1 [Salmo salar]
BX306883.p.om.7	23	1.19	0.1	1.09	11.9	ref|NP_001133352.1|	retrograde Golgi transport protein RGP1 homolog [Salmo salar]_x0001_gb|ACI33079.1| Ran GTPase-activating protein 1 [Salmo salar]
CB497070.p.om.7	23	2.09	0.18	1.91	11.6111	gb|ACI67795.1|	40S ribosomal protein S3 [Salmo salar]
CR372094.p.om.7	11	0.9	0.08	0.82	11.25	ref|NP_001134154.1|	signal peptidase complex subunit 3 homolog [Salmo salar]_x0001_gb|ACI66419.1| Signal peptidase complex subunit 3 [Salmo salar]
CR373945.p.om.7	11	0.66	0.06	0.6	11	gb|AAT68070.1|	polo-like kinase [Danio rerio]
CX254122.p.om.7	10	0.84	0.08	0.75	10.5	gb|AAI18676.1|	Si:busm1-189a20.4 protein [Danio rerio]
GE829075.p.om.7	10	0.62	0.06	0.56	10.3333	gb|ACI34030.1|	Vacuolar proton pump subunit H [Salmo salar]
BX084652.p.om.7	9	0.3	0.03	0.26	10	gb|ACO07498.1|	Vesicle transport protein GOT1B [Oncorhynchus mykiss]
BX299893.p.om.7	10	0.58	0.06	0.52	9.66667	ref|XM_002027974.1|	Drosophila persimilis GL15050 (Dper\GL15050), mRNA
CB496141.p.om.7	19	2.54	0.27	2.27	9.40741	gb|ABG37914.1|	cytochrome oxidase subunit 1 [Oncorhynchus masou masou]
CB492825.p.om.7	28	1.97	0.21	1.76	9.38095	ref|NP_001158561.1|	Replication protein A 14 kDa subunit [Oncorhynchus mykiss]_x0001_gb|ACO08269.1| Replication protein A 14 kDa subunit [Oncorhynchus mykiss]
BX080013.p.om.7	9	0.74	0.08	0.66	9.25	emb|CAQ13959.1|	Fas associated factor 1 [Danio rerio]
BX861109.p.om.7	9	0.55	0.06	0.49	9.16667	gb|ACO09856.1|	Melanoma-associated antigen G1 [Osmerus mordax]
CU071280.p.om.7	19	0.73	0.08	0.65	9.125	gb|ACO08898.1|	U3 small nucleolar RNA-interacting protein 2 [Osmerus mordax]
BX310403.p.om.7	9	0.36	0.04	0.32	9	gb|ACN60233.1|	TRAF-interacting protein [Salmo salar]
CA369313.p.om.7	9	1.16	0.13	1.03	8.92308	gb|ACI67438.1|	BCCIP homolog [Salmo salar]_x0001_gb|ACM08568.1| BCCIP homolog [Salmo salar]_x0001_gb|ACN10122.1| BCCIP homolog [Salmo salar]_x0001_gb|ACN12473.1| BCCIP homolog [Salmo salar]
CR374461.p.om.7	9	0.53	0.06	0.47	8.83333	gb|AAH21297.2|	DYNC1H1 protein [Homo sapiens]
CU067303.p.om.7	9	0.52	0.06	0.46	8.66667	emb|CAX51642.1|	C. elegans protein F17C8.9, confirmed by transcript evidence [Caenorhabditis elegans]
CA342310.p.om.7	17	1.36	0.16	1.2	8.5	gb|ACO08391.1|	NADH dehydrogenase 1 alpha subcomplex subunit 4 [Oncorhynchus mykiss]_x0001_gb|ACO08564.1| NADH dehydrogenase 1 alpha subcomplex subunit 4 [Oncorhynchus mykiss]
CA354978.p.om.7	8	0.5	0.06	0.44	8.33333	gb|ACI33930.1|	NADH-ubiquinone oxidoreductase 75 kDa subunit, mitochondrial precursor [Salmo salar]
BX307080.p.om.7	17	0.99	0.12	0.87	8.25	emb|CAG02932.1|	unnamed protein product [Tetraodon nigroviridis]
CA365920.p.om.7	8	0.41	0.05	0.36	8.2	ref|NP_500441.2|	C-type LECtin family member (clec-174) [Caenorhabditis elegans]_x0001_gb|AAF60597.2| C-type lectin protein 174, partially confirmed by transcript evidence [Caenorhabditis elegans]
BX862322.p.om.7	17	0.98	0.12	0.87	8.16667	ref|NP_001134488.1|	Eukaryotic translation elongation factor 1 epsilon-1 [Salmo salar]_x0001_gb|ACI67723.1| Eukaryotic translation elongation factor 1 epsilon-1 [Salmo salar]
CA345879.p.om.7	8	0.57	0.07	0.49	8.14286	gb|ACN10702.1|	Nuclear migration protein nudC [Salmo salar]
CX026233.p.om.7	8	0.48	0.06	0.42	8	gb|ACI68113.1|	Cyclin-dependent kinases regulatory subunit 1 [Salmo salar]_x0001_gb|ACI68394.1| Cyclin-dependent kinases regulatory subunit 1 [Salmo salar]
CX252610.p.om.7	8	0.8	0.1	0.7	8	gb|DAA22797.1|	zinc finger protein 572 [Bos taurus]
BX296730.p.om.7	8	0.47	0.06	0.41	7.83333	ref|NP_001139986.1|	SUMO-activating enzyme subunit 1 [Salmo salar]_x0001_gb|ACM09034.1| SUMO-activating enzyme subunit 1 [Salmo salar]
CT572081.p.om.7	8	0.47	0.06	0.41	7.83333	gb|ABO28528.1|	BTEB transcription factor [Pimephales promelas]
CA376789.p.om.7	8	0.54	0.07	0.47	7.71429	ref|NP_001117008.1|	rod-like opsin [Salmo salar]_x0001_gb|AAF44619.1|AF201469_1 rod-like opsin [Salmo salar]
BX859079.p.om.7	8	0.46	0.06	0.4	7.66667	ref|NP_001008080.1|	casein kinase 2, alpha prime polypeptide [Xenopus (Silurana) tropicalis]_x0001_gb|AAH80979.1| casein kinase 2, alpha prime polypeptide [Xenopus (Silurana) tropicalis]
BX861687.p.om.7	8	0.46	0.06	0.4	7.66667	ref|NP_001158748.1|	Zinc finger protein 271 [Salmo salar]_x0001_gb|ACN10197.1| Zinc finger protein 271 [Salmo salar]_x0001_gb|ACN12551.1| Zinc finger protein 271 [Salmo salar]
CA374807.p.om.7	8	0.23	0.03	0.2	7.66667	gb|AAH26799.1|	F-box protein 45 [Mus musculus]
CA361285.p.om.7	8	0.53	0.07	0.46	7.57143	ref|NP_998404.1|	nuclear receptor subfamily 2, group F, member 6b [Danio rerio]_x0001_gb|AAH65332.1| Nuclear receptor subfamily 2, group F, member 6b [Danio rerio]
BX318026.p.om.7	8	0.45	0.06	0.39	7.5	ref|NP_001117934.1|	FHA-HIT [Oncorhynchus mykiss]_x0001_gb|AAR00221.1| FHA-HIT [Oncorhynchus mykiss]
BX886396.p.om.7	8	0.45	0.06	0.39	7.5	ref|NP_001137312.1|	adenomatosis polyposis coli [Danio rerio]
BX299153.p.om.7	7	0.3	0.04	0.26	7.5	ref|NP_001139979.1|	p21-activated protein kinase-interacting protein 1-like [Salmo salar]_x0001_gb|ACM09000.1| p21-activated protein kinase-interacting protein 1-like [Salmo salar]
BX076796.p.om.7	7	0.37	0.05	0.31	7.4	gb|ACO08395.1|	Proteasome subunit beta type 7 precursor [Oncorhynchus mykiss]
CX041173.p.om.7	8	0.59	0.08	0.51	7.375	gb|ACO08219.1|	Prostaglandin E synthase 3 [Oncorhynchus mykiss]
CU063093.p.om.7	23	1.02	0.14	0.88	7.28571	ref|NP_001118221.1|	heat shock transcription factor 1a [Oncorhynchus mykiss]_x0001_dbj|BAD10988.1| heat shock transcription factor 1 isoform a [Oncorhynchus mykiss]
BX079623.p.om.7	22	1.01	0.14	0.86	7.21429	ref|NP_001003546.2|	GINS complex subunit 4 [Danio rerio]
CX246524.p.om.7	7	0.36	0.05	0.3	7.2	gb|AAH95593.1|	Thrombospondin 4b [Danio rerio]
CX259732.p.om.7	15	1.21	0.17	1.04	7.11765	ref|XP_001343218.2|	PREDICTED: ATP-binding cassette, sub-family B (MDR/TAP), member 10 [Danio rerio]
CA346486.p.om.7	7	0.21	0.03	0.18	7	ref|NP_001016952.1|	guanine nucleotide binding protein (G protein), beta polypeptide 4 [Xenopus (Silurana) tropicalis]_x0001_emb|CAJ81983.1| guanine nucleotide binding protein (G protein), beta polypeptide 4 [Xenopus (Silurana) tropicalis]
BX876083.p.om.7	7	0.49	0.07	0.41	7	gb|ACO08062.1|	39S ribosomal protein L21, mitochondrial precursor [Oncorhynchus mykiss]
BX880636.p.om.7	7	0.35	0.05	0.3	7	gb|AAT47549.1|	glycerol-3-phosphate dehydrogenase [Gadus morhua]
BX310025.p.om.7	14	0.55	0.08	0.47	6.875	gb|ACO10070.1|	Glycerol-3-phosphate dehydrogenase, cytoplasmic [Osmerus mordax]
CA352619.p.om.7	7	0.82	0.12	0.7	6.83333	gb|ACN58697.1|	SWI/SNF-related matrix-associated actin-dependent regulator of chromatin subfamily B member 1 [Salmo salar]
BX874001.p.om.7	7	0.75	0.11	0.64	6.81818	ref|NM_001132381.1|	Pongo abelii elongation factor Tu GTP binding domain containing 1 (EFTUD1), mRNA_x0001_emb|CR859273.1| Pongo abelii mRNA; cDNA DKFZp468B045 (from clone DKFZp468B045)
CB495872.p.om.7	14	0.75	0.11	0.64	6.81818	ref|NP_001108613.1|	DEAH (Asp-Glu-Ala-His) box polypeptide 15 [Danio rerio]
CA355678.p.om.7	7	0.27	0.04	0.23	6.75	ref|NP_001135327.1|	Caveolin-3 [Salmo salar]_x0001_gb|ACI67595.1| Caveolin-3 [Salmo salar]
CA360754.p.om.7	7	0.54	0.08	0.46	6.75	gb|ACX71752.1|	nucleotide-binding oligomerization domain-1 [Ctenopharyngodon idella]_x0001_gb|ADB92611.1| nucleotide-binding oligomerization domain-1 [Ctenopharyngodon idella]
BX083660.p.om.7	7	0.74	0.11	0.63	6.72727	gb|ACN10807.1|	ATP-dependent Clp protease ATP-binding subunit clpX-like, mitochondrial precursor [Salmo salar]
BX075593.p.om.7	7	0.47	0.07	0.4	6.71429	gb|ACO08764.1|	Proteasome subunit beta type 3 [Oncorhynchus mykiss]
CR363874.p.om.7	7	0.4	0.06	0.34	6.66667	gb|ACO08219.1|	Prostaglandin E synthase 3 [Oncorhynchus mykiss]
BX880136.p.om.7	14	1.39	0.21	1.19	6.61905	gb|AAH92169.1|	Pik3c3 protein [Danio rerio]_x0001_gb|AAI64467.1| Pik3c3 protein [Danio rerio]
CX351390.p.om.7	219	16.14	2.45	13.7	6.58776	gb|ACQ58888.1|	40S ribosomal protein S18 [Anoplopoma fimbria]
BX300482.p.om.7	14	0.92	0.14	0.78	6.57143	gb|ACH70809.1|	actin related protein 2/3 complex subunit 2 [Salmo salar]
BX318165.p.om.7	13	0.59	0.09	0.49	6.55556	ref|NP_997942.1|	bromodomain-containing protein 8 [Danio rerio]_x0001_gb|AAH57496.1| Bromodomain containing 8 [Danio rerio]
BX309951.p.om.7	7	0.39	0.06	0.34	6.5	ref|NP_001003504.1|	polyadenylate-binding protein-interacting protein 1 [Danio rerio]_x0001_gb|AAH78339.1| Poly(A) binding protein interacting protein 1 [Danio rerio]_x0001_emb|CAQ13611.1| poly(A) binding protein interacting protein 1 [Danio rerio]
GE821598.p.om.7	7	0.39	0.06	0.33	6.5	gb|ACN09892.1|	40S ribosomal protein S3 [Salmo salar]_x0001_gb|ACN12239.1| 40S ribosomal protein S3 [Salmo salar]
BX074352.p.om.7	7	0.19	0.03	0.17	6.33333	gb|EAW69224.1|	chromatin assembly factor 1, subunit A (p150), isoform CRA_a [Homo sapiens]_x0001_gb|EAW69225.1| chromatin assembly factor 1, subunit A (p150), isoform CRA_a [Homo sapiens]
BX304200.p.om.7	7	0.38	0.06	0.33	6.33333	gb|ADD24091.1|	Mps one binder kinase activator-like 1 [Lepeophtheirus salmonis]
CT564181.p.om.7	39	1.45	0.23	1.22	6.30435	ref|YP_003029805.1|	cytochrome c oxidase subunit II [Thymallus thymallus]_x0001_ref|YP_003029818.1| cytochrome c oxidase subunit II [Thymallus arcticus]_x0001_gb|ACO52890.1| cytochrome oxidase subunit II [Thymallus thymallus]_x0001_gb|ACP40556.1| cytochrome oxidase subunit II [Thymallus arcticus]
BX295427.p.om.7	7	0.37	0.06	0.32	6.16667	gb|ACN58625.1|	Nardilysin precursor [Salmo salar]
BX297651.p.om.7	7	0.37	0.06	0.32	6.16667	ref|NP_001133124.1|	muscle specific ring finger protein 1-like [Salmo salar]_x0001_gb|ACH70731.1| muscle specific ring finger protein 1-like [Salmo salar]
CU072058.p.om.7	19	0.74	0.12	0.62	6.16667	ref|NP_001134069.1|	Sodium/potassium-transporting ATPase subunit beta-233 [Salmo salar]_x0001_gb|ACI66117.1| Sodium/potassium-transporting ATPase subunit beta-233 [Salmo salar]
CA348403.p.om.7	13	0.73	0.12	0.62	6.08333	ref|XP_700241.2|	PREDICTED: bifunctional protein NCOAT-like [Danio rerio]
CA343440.p.om.7	13	0.54	0.09	0.45	6	gb|ACM08346.1|	Ubiquitin-conjugating enzyme E2 E1 [Salmo salar]
BX298519.p.om.7	6	0.24	0.04	0.2	6	ref|NP_001016531.1|	CCR4 carbon catabolite repression 4-like [Xenopus (Silurana) tropicalis]_x0001_emb|CAJ82796.1| CCR4 carbon catabolite repression 4-like (S. cerevisiae) [Xenopus tropicalis]_x0001_gb|AAI70786.1| CCR4 carbon catabolite repression 4-like (S. cerevisiae) [Xenopus (Silurana) tropicalis]
BX879090.p.om.7	6	0.18	0.03	0.15	6	gb|EAW55745.1|	general transcription factor IIIC, polypeptide 1, alpha 220kDa, isoform CRA_b [Homo sapiens]
BX889272.p.om.7	6	0.36	0.06	0.3	6	gb|ACO08034.1|	Mitochondrial 28S ribosomal protein S30 [Oncorhynchus mykiss]
CA352251.p.om.7	6	0.24	0.04	0.2	6	ref|NP_001158765.1|	C-X-C chemokine receptor type 4 [Salmo salar]_x0001_gb|ACN10355.1| C-X-C chemokine receptor type 4 [Salmo salar]_x0001_gb|ACN12715.1| C-X-C chemokine receptor type 4 [Salmo salar]
M93698.p.om.7	6	0.24	0.04	0.2	6	ref|NP_001134339.1|	ependymin-2 precursor [Salmo salar]_x0001_gb|ACI67122.1| Ependymin-2 precursor [Salmo salar]
BX310195.p.om.7	6	0.3	0.05	0.25	6	ref|NP_001134556.1|	phosphatidylinositol-glycan biosynthesis class F protein [Salmo salar]_x0001_gb|ACI67997.1| Phosphatidylinositol-glycan biosynthesis class F protein [Salmo salar]
BX311267.p.om.7	6	0.3	0.05	0.25	6	gb|ACI69749.1|	Dehydrogenase/reductase SDR family member 13 precursor [Salmo salar]
CU073636.p.om.7	12	0.42	0.07	0.35	6	ref|NP_001154018.1|	Probable tRNA pseudouridine synthase 2 [Oncorhynchus mykiss]_x0001_gb|ACO07547.1| Probable tRNA pseudouridine synthase 2 [Oncorhynchus mykiss]
CR361779.p.om.7	31	1.6	0.27	1.32	5.92593	gb|AAP20216.1|	40S ribosomal protein S4 [Pagrus major]
CB493037.p.om.7	6	0.41	0.07	0.34	5.85714	ref|NP_001027922.1|	coagulation factor VIII precursor [Takifugu rubripes]_x0001_gb|AAO33374.1|AF465279_1 coagulation factor VIII precursor [Takifugu rubripes]
BX869066.p.om.7	6	0.35	0.06	0.28	5.83333	ref|NP_001167109.1|	NEDD1 protein [Salmo salar]_x0001_gb|ACN10852.1| NEDD1 [Salmo salar]
CA356819.p.om.7	6	0.35	0.06	0.29	5.83333	gb|GU817335.1|	Salmo salar clone BAC CHORI214-083H23 complete sequence
CA356867.p.om.7	6	0.35	0.06	0.28	5.83333	ref|NP_001025297.1|	myotubularin related protein 7b [Danio rerio]_x0001_gb|AAH97161.1| Myotubularin related protein 7b [Danio rerio]
GE838259.p.om.7	12	0.64	0.11	0.52	5.81818	gb|AAX12162.1|	bloodthirsty [Chaenocephalus aceratus]
BX870508.p.om.7	6	0.58	0.1	0.48	5.8	ref|NP_001070745.2|	histone-lysine N-methyltransferase SETDB1-B [Danio rerio]
CX125636.p.om.7	6	0.52	0.09	0.43	5.77778	ref|ZP_06658960.1|	CcdB toxin protein [Escherichia coli B185]_x0001_gb|EFF04660.1| CcdB toxin protein [Escherichia coli B185]
BX306515.p.om.7	6	0.23	0.04	0.19	5.75	ref|NP_001158748.1|	Zinc finger protein 271 [Salmo salar]_x0001_gb|ACN10197.1| Zinc finger protein 271 [Salmo salar]_x0001_gb|ACN12551.1| Zinc finger protein 271 [Salmo salar]
CA343653.p.om.7	6	0.23	0.04	0.19	5.75	gb|ACO13356.1|	Galactose-specific lectin [Esox lucius]
CA383469.p.om.7	6	0.23	0.04	0.19	5.75	gb|AAH75904.1|	Rasgef1ba protein [Danio rerio]_x0001_emb|CAM15193.1| RasGEF domain family, member 1B [Danio rerio]
BX308707.p.om.7	18	0.8	0.14	0.66	5.71429	ref|NP_001121442.1|	CSE1 chromosome segregation 1-like [Xenopus (Silurana) tropicalis]_x0001_gb|AAI66193.1| cse1l protein [Xenopus (Silurana) tropicalis]
BX878126.p.om.7	6	0.4	0.07	0.33	5.71429	ref|NP_001158789.1|	26S proteasome non-ATPase regulatory subunit 2 [Salmo salar]_x0001_gb|ACN10471.1| 26S proteasome non-ATPase regulatory subunit 2 [Salmo salar]
BX307973.p.om.7	30	1.37	0.24	1.13	5.70833	ref|NP_001167352.1|	pre-mRNA-processing factor 19 [Salmo salar]_x0001_gb|ACN11451.1| Pre-mRNA-processing factor 19 [Salmo salar]
GE839048.p.om.7	18	0.91	0.16	0.75	5.6875	gb|ACO07592.1|	Mitochondrial carrier homolog 2 [Oncorhynchus mykiss]
CA365937.p.om.7	6	0.68	0.12	0.56	5.66667	gb|EAW52567.1|	polynucleotide kinase 3'-phosphatase, isoform CRA_c [Homo sapiens]
CR371688.p.om.7	6	0.68	0.12	0.56	5.66667	gb|ADI40547.1|	lysosomal H+-transporting ATPase V1 subunit A [Rousettus leschenaultii]
CA349913.p.om.7	6	0.62	0.11	0.51	5.63636	ref|NP_001133799.1|	probable ATP-dependent RNA helicase DDX41 [Salmo salar]_x0001_gb|ACI33918.1| Probable ATP-dependent RNA helicase DDX41 [Salmo salar]
CT565571.p.om.7	6	1.07	0.19	0.88	5.63158	dbj|BAI50175.1|	cytochrome c oxidase subunit III [Bathytroctes breviceps]
BX876307.p.om.7	60	1.63	0.29	1.34	5.62069	ref|NP_001018610.2|	SWI/SNF-related, matrix-associated actin-dependent regulator of chromatin, subfamily a, containing DEAD/H box 1 [Danio rerio]
BX073647.p.om.7	12	0.67	0.12	0.55	5.58333	ref|NP_001093668.1|	quaking homolog, KH domain RNA binding [Xenopus (Silurana) tropicalis]_x0001_gb|AAI35441.1| qki protein [Xenopus (Silurana) tropicalis]
BX303156.p.om.7	12	0.61	0.11	0.5	5.54545	ref|NP_001167223.1|	Zygotic DNA replication licensing factor mcm6-B [Salmo salar]_x0001_gb|ACN11132.1| Zygotic DNA replication licensing factor mcm6-B [Salmo salar]
CX036791.p.om.7	6	1.33	0.24	1.09	5.54167	gb|AAI72916.1|	A-kinase anchor protein 9 isoform 3 [synthetic construct]
BX296712.p.om.7	6	0.33	0.06	0.27	5.5	ref|NP_001094417.1|	hypothetical protein LOC559398 [Danio rerio]_x0001_emb|CAM15830.1| novel protein [Danio rerio]
BX297962.p.om.7	6	0.33	0.06	0.27	5.5	gb|AAH74047.1|	Zgc:162544 protein [Danio rerio]_x0001_gb|AAI24479.1| Zgc:162544 protein [Danio rerio]
BX313739.p.om.7	6	0.33	0.06	0.27	5.5	gb|ABQ22898.1|	glutamate carboxypeptidase 2-like protein [Callithrix jacchus]
BX877538.p.om.7	6	0.33	0.06	0.27	5.5	emb|CAG30559.1|	BOULE protein [Saimiri sciureus]
BX306641.p.om.7	18	0.82	0.15	0.67	5.46667	ref|NP_001133147.1|	ribosomal protein L3-like [Salmo salar]_x0001_gb|ACH70797.1| ribosomal protein L3-like [Salmo salar]
BX879677.p.om.7	6	0.82	0.15	0.67	5.46667	gb|EDM04244.1|	goliath, isoform CRA_a [Rattus norvegicus]
CX720535.p.om.7	12	0.82	0.15	0.68	5.46667	gb|ACN58670.1|	Elongation factor 2 [Salmo salar]
BX882365.p.om.7	6	0.49	0.09	0.41	5.44444	ref|NP_001136306.1|	remodeling and spacing factor 1 [Sus scrofa]_x0001_gb|ACJ53937.1| remodeling and spacing factor 1 [Sus scrofa]
CA388329.p.om.7	6	0.38	0.07	0.32	5.42857	gb|ADB56962.1|	delta-6 fatty acyl desaturase [Salmo salar]
CB494836.p.om.7	29	2.82	0.52	2.3	5.42308	gb|AAK31583.1|	heat shock protein 70 [Ambystoma mexicanum]
CU065982.p.om.7	6	0.27	0.05	0.22	5.4	dbj|BAD90027.1|	heat shock 70kDa protein 8 isoform b [Oncorhynchus mykiss]
CA381557.p.om.7	6	0.43	0.08	0.36	5.375	gb|AAI66782.1|	Tpcn2 protein [Rattus norvegicus]
BX301934.p.om.7	17	0.91	0.17	0.74	5.35294	gb|AAH54934.1|	Usp40 protein [Danio rerio]
BX075267.p.om.7	6	0.32	0.06	0.26	5.33333	gb|ACO09925.1|	PKHD-type hydroxylase YER049W [Osmerus mordax]
BX308660.p.om.7	6	0.32	0.06	0.26	5.33333	ref|NP_001134883.1|	sorting nexin-3 [Salmo salar]_x0001_gb|ACI69295.1| Sorting nexin-3 [Salmo salar]
BX310298.p.om.7	6	0.32	0.06	0.26	5.33333	ref|NP_001133098.1|	conserved oligomeric Golgi complex subunit 2 [Salmo salar]_x0001_gb|ACH70688.1| component of oligomeric golgi complex 2 [Salmo salar]
BX862224.p.om.7	6	0.32	0.06	0.27	5.33333	ref|NP_001133769.1|	carbonic anhydrase [Salmo salar]_x0001_gb|ACI33869.1| Carbonic anhydrase [Salmo salar]_x0001_gb|ACN10477.1| Carbonic anhydrase [Salmo salar]
BX888781.p.om.7	6	0.32	0.06	0.26	5.33333	gb|AAI44411.1|	Paxillin [Homo sapiens]
BX910036.p.om.7	6	0.32	0.06	0.26	5.33333	ref|NP_001134034.1|	Nucleoporin NUP85 [Salmo salar]_x0001_gb|ACI34352.1| Nucleoporin NUP85 [Salmo salar]
CA363246.p.om.7	6	0.37	0.07	0.3	5.28571	ref|NM_001145616.1|	Danio rerio si:dkey-202m23.1 (si:dkey-202m23.1), mRNA
CR943438.p.om.7	6	0.21	0.04	0.17	5.25	gb|ACN09957.1|	40S ribosomal protein S7 [Salmo salar]_x0001_gb|ACN12304.1| 40S ribosomal protein S7 [Salmo salar]
CA365226.p.om.7	17	1.31	0.25	1.06	5.24	ref|NP_001134377.1|	Exosome complex exonuclease RRP44 [Salmo salar]_x0001_gb|ACI67260.1| Exosome complex exonuclease RRP44 [Salmo salar]
BX295290.p.om.7	6	0.26	0.05	0.21	5.2	ref|NP_999961.1|	TATA box-binding protein-like protein 2 [Danio rerio]_x0001_gb|AAP87373.1| TATA-binding protein 2 [Danio rerio]
CA358685.p.om.7	6	0.26	0.05	0.21	5.2	dbj|BAG81980.1|	neurexin Ia beta [Danio rerio]
BX869319.p.om.7	11	0.57	0.11	0.46	5.18182	gb|AAI37707.1|	Fkbp15 protein [Mus musculus]
BX310573.p.om.7	6	0.31	0.06	0.26	5.16667	ref|NP_001158757.1|	Chromobox protein homolog 1 [Salmo salar]_x0001_gb|ACN10302.1| Chromobox protein homolog 1 [Salmo salar]_x0001_gb|ACN12662.1| Chromobox protein homolog 1 [Salmo salar]
BX314982.p.om.7	6	0.31	0.06	0.26	5.16667	ref|NP_001134266.1|	NFU1 iron-sulfur cluster scaffold homolog [Salmo salar]_x0001_gb|ACI66848.1| NFU1 iron-sulfur cluster scaffold homolog [Salmo salar]
BX880458.p.om.7	6	0.31	0.06	0.26	5.16667	ref|NP_001133677.1|	Probable aminopeptidase NPEPL1 [Salmo salar]_x0001_gb|ACI33685.1| Probable aminopeptidase NPEPL1 [Salmo salar]
CA348982.p.om.7	11	0.62	0.12	0.5	5.16667	ref|NP_001167336.1|	Prolyl endopeptidase [Salmo salar]_x0001_gb|ACN11407.1| Prolyl endopeptidase [Salmo salar]
BX865455.p.om.7	22	1.18	0.23	0.95	5.13043	gb|ACO14467.1|	DNA fragmentation factor subunit beta [Esox lucius]
CT571798.p.om.7	11	1.84	0.36	1.47	5.11111	gb|ACO09841.1|	40S ribosomal protein S16 [Osmerus mordax]
BX311409.p.om.7	28	1.48	0.29	1.19	5.10345	gb|ACN11309.1|	U2 small nuclear ribonucleoprotein B [Salmo salar]
GE825907.p.om.7	11	0.56	0.11	0.45	5.09091	ref|NP_001153996.1|	peptidyl-prolyl cis-trans isomerase E [Oncorhynchus mykiss]_x0001_gb|ACO07487.1| Peptidyl-prolyl cis-trans isomerase E [Oncorhynchus mykiss]
CA345937.p.om.7	28	1.16	0.23	0.94	5.04348	gb|AAI54329.1|	Hnrnpl protein [Danio rerio]
BX317930.p.om.7	5	0.2	0.04	0.15	5	gb|ACO08779.1|	Rho-related GTP-binding protein RhoF [Oncorhynchus mykiss]
CA345188.p.om.7	5	0.2	0.04	0.16	5	gb|ACQ58753.1|	Carboxypeptidase O precursor [Anoplopoma fimbria]
CA357132.p.om.7	5	0.2	0.04	0.15	5	gb|ACI33206.1|	Transcription factor MafB [Salmo salar]_x0001_gb|ACN10763.1| Transcription factor MafB [Salmo salar]
CA386745.p.om.7	5	0.15	0.03	0.12	5	ref|NP_001167196.1|	Sodium/iodide cotransporter [Salmo salar]_x0001_gb|ACN11052.1| Sodium/iodide cotransporter [Salmo salar]
CX026984.p.om.7	11	0.95	0.19	0.76	5	ref|NP_001158826.1|	ubiquitin-conjugating enzyme E2 H [Salmo salar]_x0001_gb|ACN10557.1| Ubiquitin-conjugating enzyme E2 H [Salmo salar]
T23100.p.om.7	5	0.15	0.03	0.11	5	ref|NP_956650.1|	protein C [Danio rerio]_x0001_gb|AAH53182.1| Protein C (inactivator of coagulation factors Va and VIIIa) [Danio rerio]
BX319464.p.om.7	49	2.53	0.51	2.02	4.96078	gb|ACI33192.1|	Mitochondrial carnitine/acylcarnitine carrier protein [Salmo salar]
BX317367.p.om.7	22	0.94	0.19	0.76	4.94737	ref|NP_001134709.1|	Vacuolar proton pump subunit F [Salmo salar]_x0001_gb|ACI68552.1| Vacuolar proton pump subunit F [Salmo salar]
BX866872.p.om.7	11	0.64	0.13	0.52	4.92308	ref|NP_001075845.1|	helicase-like transcription factor beta [Oryctolagus cuniculus]_x0001_gb|AAC48693.1| RUSH-1beta [Oryctolagus cuniculus]
BX072656.p.om.7	16	0.88	0.18	0.7	4.88889	gb|ACP56687.1|	elongation factor EF1 alpha [Oncorhynchus tshawytscha]
CA368359.p.om.7	5	0.34	0.07	0.26	4.85714	dbj|BAA96065.1|	KIAA1541 protein [Homo sapiens]
CX035770.p.om.7	5	0.34	0.07	0.26	4.85714	ref|NP_001071858.1|	zinc finger protein [Ciona intestinalis]_x0001_dbj|BAE06772.1| zinc finger protein [Ciona intestinalis]
CR943458.p.om.7	5	0.29	0.06	0.22	4.83333	gb|ACN11344.1|	Tripartite motif-containing protein 25 [Salmo salar]
GE824199.p.om.7	5	0.29	0.06	0.22	4.83333	ref|NM_001039474.1|	Mus musculus transcription elongation regulator 1 (CA150) (Tcerg1), mRNA
CA351257.p.om.7	53	3.8	0.79	3.02	4.81013	gb|ACI66788.1|	Heme oxygenase [Salmo salar]
BX076164.p.om.7	5	0.24	0.05	0.19	4.8	dbj|BAD60784.1|	NADPH oxidase cytosolic protein p67phox short form [Oncorhynchus mykiss]
BX310228.p.om.7	5	0.24	0.05	0.19	4.8	gb|ACI66878.1|	28S ribosomal protein S18b, mitochondrial precursor [Salmo salar]_x0001_gb|ACI69777.1| 28S ribosomal protein S18b, mitochondrial precursor [Salmo salar]
BX310835.p.om.7	11	0.48	0.1	0.39	4.8	ref|NP_001158745.1|	kinase-like protein SgK196 [Salmo salar]_x0001_gb|ACN10125.1| kinase-like protein SgK196 [Salmo salar]_x0001_gb|ACN12476.1| kinase-like protein SgK196 [Salmo salar]
BX077970.p.om.7	21	0.67	0.14	0.53	4.78571	ref|NP_001134456.1|	RING finger protein 182 [Salmo salar]_x0001_gb|ACI67603.1| RING finger protein 182 [Salmo salar]
BX080726.p.om.7	1112	91.39	19.22	72.2	4.75494	gb|EAW89848.1|	ribosomal protein L39, isoform CRA_b [Homo sapiens]
CA369679.p.om.7	5	0.19	0.04	0.15	4.75	ref|NP_898867.1|	kinesin-like protein KIF20B [Mus musculus]
CU063946.p.om.7	5	0.19	0.04	0.15	4.75	gb|ACN09990.1|	40S ribosomal protein S6 [Salmo salar]_x0001_gb|ACN12337.1| 40S ribosomal protein S6 [Salmo salar]
CB498513.p.om.7	21	1.47	0.31	1.16	4.74194	gb|AAI54329.1|	Hnrnpl protein [Danio rerio]
CU067206.p.om.7	10	0.52	0.11	0.4	4.72727	pdb|2V3D|A	Chain A, Acid-Beta-Glucosidase With N-Butyl-Deoxynojirimycin_x0001_pdb|2V3D|B Chain B, Acid-Beta-Glucosidase With N-Butyl-Deoxynojirimycin_x0001_pdb|2V3E|A Chain A, Acid-Beta-Glucosidase With N-Nonyl-Deoxynojirimycin_x0001_pdb|2V3E|B Chain B, Acid-Beta-Glucosidase With N-Nonyl-Deoxynojirimycin_x0001_pdb|2V3F|A Chain A, Acid-Beta-Glucosidase Produced In Carrot_x0001_pdb|2V3F|B Chain B, Acid-Beta-G…
GE826983.p.om.7	10	0.52	0.11	0.4	4.72727	gb|ACM08995.1|	Charged multivesicular body protein 1b [Salmo salar]
BX881638.p.om.7	5	0.33	0.07	0.26	4.71429	ref|NP_001039293.1|	solute carrier family 22 member 5 [Gallus gallus]_x0001_emb|CAF18546.1| OCTN2 protein [Gallus gallus]
BX862639.p.om.7	26	1.36	0.29	1.07	4.68966	ref|NP_001134864.1|	Transcription initiation factor TFIID subunit 11 [Salmo salar]_x0001_gb|ACI69207.1| Transcription initiation factor TFIID subunit 11 [Salmo salar]
BX080025.p.om.7	5	0.28	0.06	0.22	4.66667	gb|ACI33427.1|	Mid1-interacting protein 1 [Salmo salar]_x0001_gb|ACI68825.1| Mid1-interacting protein 1 [Salmo salar]_x0001_gb|ACM08619.1| Mid1-interacting protein 1 [Salmo salar]
CA342679.p.om.7	5	0.14	0.03	0.11	4.66667	ref|NP_958453.1|	polyadenylate-binding protein 4 [Danio rerio]_x0001_gb|AAH53126.1| Poly(A) binding protein, cytoplasmic 4 (inducible form) [Danio rerio]
CA344162.p.om.7	5	0.28	0.06	0.22	4.66667	gb|ACN58638.1|	AP-1 complex subunit gamma-like 2 [Salmo salar]
CR364918.p.om.7	5	0.28	0.06	0.22	4.66667	emb|CAQ14161.1|	novel zinc finger protein [Danio rerio]
CU071128.p.om.7	97	3.94	0.85	3.09	4.63529	ref|NP_001158532.1|	Transforming protein RhoA [Oncorhynchus mykiss]_x0001_gb|ACI66793.1| Transforming protein RhoA precursor [Salmo salar]_x0001_gb|ACO08168.1| Transforming protein RhoA precursor [Oncorhynchus mykiss]
CA367226.p.om.7	20	0.83	0.18	0.64	4.61111	gb|ACN58693.1|	Nardilysin precursor [Salmo salar]
BX300844.p.om.7	5	0.23	0.05	0.18	4.6	gb|ACN10195.1|	Alcohol dehydrogenase [Salmo salar]_x0001_gb|ACN12549.1| Alcohol dehydrogenase [Salmo salar]
BX870730.p.om.7	5	0.23	0.05	0.18	4.6	ref|NP_001038117.1|	protein kinase C and casein kinase substrate in neurons 3 [Gallus gallus]_x0001_gb|ABF57669.1| PACSIN 3 [Gallus gallus]
BX880337.p.om.7	5	0.23	0.05	0.18	4.6	dbj|BAD89556.1|	proteasome subunit [Oncorhynchus mykiss]
CA352466.p.om.7	5	0.23	0.05	0.18	4.6	gb|AAL04169.1|AF412833_1	mismatch repair protein Msh2 [Danio rerio]
CA365379.p.om.7	5	0.46	0.1	0.36	4.6	ref|YP_001122909.1|	NADH dehydrogenase subunit 4 [Oncorhynchus kisutch]_x0001_gb|ABK81700.1| NADH dehydrogenase subunit 4 [Oncorhynchus kisutch]
BX307042.p.om.7	15	0.64	0.14	0.5	4.57143	gb|ACI68221.1|	Vacuolar proton pump subunit E 1 [Salmo salar]
CX262354.p.om.7	5	0.32	0.07	0.25	4.57143	emb|CAA48757.1|	chicken alphaA-CRYBP1 [Gallus gallus]
BX880687.p.om.7	126	6.85	1.5	5.34	4.56667	gb|ACO13741.1|	Peptidyl-prolyl cis-trans isomerase NIMA-interacting 4 [Esox lucius]
AB037398.p.om.7	5	1.46	0.32	1.14	4.5625	ref|NP_001133815.1|	sorting nexin-2 [Salmo salar]_x0001_gb|ACI33942.1| Sorting nexin-2 [Salmo salar]
CA370321.p.om.7	15	1.14	0.25	0.89	4.56	gb|ABI95426.1|	brain and muscle ARNT-like 1 protein [Haplochromis burtoni]
CN211212.p.om.7	5	0.41	0.09	0.32	4.55556	gb|ACO08005.1|	60S ribosomal protein L9 [Oncorhynchus mykiss]
CU063557.p.om.7	10	0.41	0.09	0.32	4.55556	emb|CT737367.4|	Pig DNA sequence from clone CH242-206G12 on chromosome 14, complete sequence
CX251897.p.om.7	5	0.41	0.09	0.32	4.55556	ref|NP_001167383.1|	histone-lysine N-methyltransferase PRDM9 [Salmo salar]_x0001_gb|ACN10800.1| PR domain zinc finger protein 9 [Salmo salar]
CA376213.p.om.7	10	0.68	0.15	0.53	4.53333	gb|ABE99697.1|	TNF receptor associated factor 1 [Ctenopharyngodon idella]
CX067369.p.om.7	10	1.45	0.32	1.13	4.53125	ref|YP_003029804.1|	cytochrome c oxidase subunit I [Thymallus thymallus]_x0001_gb|ACO52889.1| cytochrome oxidase subunit I [Thymallus thymallus]
CX066471.p.om.7	5	0.77	0.17	0.6	4.52941	ref|YP_003029821.1|	cytochrome c oxidase subunit III [Thymallus arcticus]_x0001_gb|ACP40559.1| cytochrome oxidase subunit III [Thymallus arcticus]
BX086886.p.om.7	15	0.86	0.19	0.67	4.52632	gb|ACN58693.1|	Nardilysin precursor [Salmo salar]
BX302764.p.om.7	65	2.71	0.6	2.11	4.51667	gb|ACO13560.1|	Histone H2AV [Esox lucius]
BX073384.p.om.7	5	0.27	0.06	0.21	4.5	gb|AAG34564.1|AF321519_1	lysozyme variant [Oncorhynchus mykiss]
BX867911.p.om.7	5	0.27	0.06	0.21	4.5	gb|AC140770.1|	Homo sapiens chromosome 5 clone RP11-78J4, complete sequence
BX883758.p.om.7	5	0.27	0.06	0.21	4.5	emb|CAI35135.1|	septin 4 [Mus musculus]_x0001_emb|CAQ52277.1| septin 4 [Mus musculus]
CA358684.p.om.7	5	0.27	0.06	0.21	4.5	dbj|BAB18733.2|	nebulin [Gallus gallus]
CT962913.p.om.7	5	0.27	0.06	0.21	4.5	pdb|2ESO|A	Chain A, Human Ubiquitin-Conjugating Enzyme (E2) Ubch5b Mutant Ile37ala
GE831633.p.om.7	5	0.27	0.06	0.21	4.5	gb|ACO14014.1|	Transmembrane emp24 domain-containing protein 2 precursor [Esox lucius]
AJ299018.p.om.7	5	0.09	0.02	0.07	4.5	ref|NP_001117833.1|	cyclooxygenase-1 [Oncorhynchus mykiss]_x0001_emb|CAC10360.1| cyclooxygenase-1 [Oncorhynchus mykiss]
BX086838.p.om.7	5	0.18	0.04	0.14	4.5	gb|ACO09607.1|	Glucose-6-phosphatase [Osmerus mordax]
BX299209.p.om.7	15	0.72	0.16	0.56	4.5	gb|AAQ02561.1|	cyclin-dependent kinase 7 [synthetic construct]
CA371318.p.om.7	15	0.9	0.2	0.7	4.5	ref|NM_001107952.1|	Rattus norvegicus zinc finger, FYVE domain containing 9 (Zfyve9), mRNA
CU072572.p.om.7	20	0.63	0.14	0.49	4.5	ref|NP_001005654.1|	origin recognition complex, subunit 4-like [Xenopus (Silurana) tropicalis]_x0001_gb|AAH74668.1| origin recognition complex, subunit 4-like (yeast) [Xenopus (Silurana) tropicalis]_x0001_emb|CAJ83538.1| origin recognition complex, subunit 4-like (yeast) [Xenopus tropicalis]
CU067925.p.om.7	25	1.3	0.29	1.02	4.48276	gb|EDM00015.1|	syntaxin 18, isoform CRA_c [Rattus norvegicus]
BX084495.p.om.7	10	0.58	0.13	0.46	4.46154	gb|ACI66189.1|	Nascent polypeptide-associated complex subunit alpha [Salmo salar]
BX321714.p.om.7	10	0.49	0.11	0.38	4.45455	ref|NP_001133914.1|	Plasma glutamate carboxypeptidase [Salmo salar]_x0001_gb|ACI34132.1| Plasma glutamate carboxypeptidase precursor [Salmo salar]
CA349117.p.om.7	10	0.49	0.11	0.38	4.45455	gb|ACI33467.1|	X-box-binding protein 1 [Salmo salar]
CB487547.p.om.7	5	0.49	0.11	0.38	4.45455	ref|NP_598435.1|	Rho guanine nucleotide exchange factor (GEF) 5 [Mus musculus]
BX306005.p.om.7	15	0.8	0.18	0.62	4.44444	gb|ACO07781.1|	ATP11, mitochondrial precursor [Oncorhynchus mykiss]
BX911643.p.om.7	10	0.62	0.14	0.48	4.42857	ref|NP_989273.1|	GTPase activating protein (SH3 domain) binding protein 2 [Xenopus (Silurana) tropicalis]_x0001_gb|AAH64172.1| GTPase activating protein (SH3 domain) binding protein 2 [Xenopus (Silurana) tropicalis]_x0001_emb|CAJ83275.1| Ras-GTPase activating protein SH3 domain-binding protein 2 (G3BP2) [Xenopus tropicalis]
CU072436.p.om.7	20	0.62	0.14	0.48	4.42857	dbj|BAC87883.1|	casein kinase I alpha S [Carassius auratus]
CX029741.p.om.7	5	0.31	0.07	0.24	4.42857	ref|NP_001070847.1|	SEC23-interacting protein [Danio rerio]_x0001_gb|AAI24598.1| SEC23 interacting protein [Danio rerio]_x0001_gb|AAI65191.1| Sec23ip protein [Danio rerio]
CX253071.p.om.7	5	0.31	0.07	0.24	4.42857	gb|AAI09765.1|	AlkB, alkylation repair homolog 1 (E. coli) [Bos taurus]
BX072686.p.om.7	10	0.53	0.12	0.41	4.41667	ref|NP_001134019.1|	8-oxoguanine DNA-glycosylase 1 [Salmo salar]_x0001_gb|ACI34323.1| N-glycosylase/DNA lyase [Salmo salar]
CT962877.p.om.7	5	0.66	0.15	0.51	4.4	gb|ACO13659.1|	60S ribosomal protein L36a [Esox lucius]
BX316328.p.om.7	10	0.44	0.1	0.34	4.4	gb|AAP12649.1|	tumor necrosis factor, alpha-induced protein 2 [Homo sapiens]
CA356923.p.om.7	5	0.22	0.05	0.17	4.4	ref|NP_001107066.1|	E3 ubiquitin-protein ligase TRIM32 [Danio rerio]_x0001_gb|AAI54642.1| Trim32 protein [Danio rerio]_x0001_gb|AAI71687.1| Tripartite motif-containing 32 [Danio rerio]_x0001_gb|AAI71691.1| Tripartite motif-containing 32 [Danio rerio]
BX306710.p.om.7	49	2.41	0.55	1.86	4.38182	ref|NP_001117034.1|	myeloid leukemia differentiation protein homologue [Salmo salar]_x0001_emb|CAJ90909.1| myeloid leukemia differentiation protein homologue [Salmo salar]
CX258118.p.om.7	39	2.41	0.55	1.86	4.38182	gb|ACO14390.1|	U6 snRNA-associated Sm-like protein LSm3 [Esox lucius]
BX088320.p.om.7	5	0.35	0.08	0.27	4.375	gb|ACO13482.1|	Probable U3 small nucleolar RNA-associated protein 11 [Esox lucius]
CA353647.p.om.7	5	0.35	0.08	0.27	4.375	ref|NP_956652.1|	ileal sodium/bile acid cotransporter [Danio rerio]_x0001_gb|AAH53189.1| Solute carrier family 10 (sodium/bile acid cotransporter family), member 2 [Danio rerio]_x0001_emb|CAQ13661.1| solute carrier family 10 (sodium/bile acid cotransporter family), member 2 [Danio rerio]_x0001_gb|AAI65330.1| Slc10a2 protein [Danio rerio]
CX249175.p.om.7	5	0.48	0.11	0.37	4.36364	gb|EDL17115.1|	ribosomal protein S15a, isoform CRA_b [Mus musculus]
CU072199.p.om.7	34	1.09	0.25	0.84	4.36	ref|NP_001167340.1|	RNA polymerase-associated protein LEO1 [Salmo salar]_x0001_gb|ACN11412.1| RNA polymerase-associated protein LEO1 [Salmo salar]
CX251555.p.om.7	29	1.61	0.37	1.24	4.35135	ref|NP_001017881.1|	sulfide:quinone oxidoreductase, mitochondrial [Danio rerio]_x0001_gb|AAH93431.1| Sulfide quinone reductase-like (yeast) [Danio rerio]
BX298095.p.om.7	5	0.26	0.06	0.2	4.33333	gb|ACM80361.1|	orphan nuclear receptor Dax1 [Oncorhynchus mykiss]
BX300760.p.om.7	24	1.3	0.3	0.99	4.33333	gb|AAI71648.1|	Ighmbp2l protein [Danio rerio]
BX870997.p.om.7	5	0.26	0.06	0.2	4.33333	ref|NP_001133943.1|	Negative elongation factor D [Salmo salar]_x0001_gb|ACI33332.1| Negative elongation factor D [Salmo salar]_x0001_gb|ACI34189.1| Negative elongation factor D [Salmo salar]
BX871320.p.om.7	5	0.26	0.06	0.21	4.33333	gb|ACM08815.1|	Four and a half LIM domains protein 1 [Salmo salar]
CA342176.p.om.7	5	0.13	0.03	0.1	4.33333	emb|CAI24714.1|	protein tyrosine phosphatase, receptor type, D [Mus musculus]_x0001_emb|CAI25476.1| protein tyrosine phosphatase, receptor type, D [Mus musculus]_x0001_emb|CAI25772.1| protein tyrosine phosphatase, receptor type, D [Mus musculus]
CA344142.p.om.7	9	0.13	0.03	0.1	4.33333	ref|NP_001165326.1|	carnitine palmitoyltransferase I-like [Oncorhynchus mykiss]_x0001_emb|CAE54358.1| carnitine palmitoyltransferase I [Oncorhynchus mykiss]
CA379644.p.om.7	5	0.26	0.06	0.2	4.33333	ref|NP_958881.1|	solute carrier family 26, member 5 [Danio rerio]_x0001_gb|AAH54604.1| Solute carrier family 26, member 5 [Danio rerio]_x0001_emb|CAI20759.1| prestin [Danio rerio]
CA362258.p.om.7	19	1.16	0.27	0.88	4.2963	gb|AAC28309.1|	cytochrome P450 monooxygenase CYP2K1v2 [Oncorhynchus mykiss]
CA350925.p.om.7	5	0.3	0.07	0.23	4.28571	ref|NP_571748.2|	transcription elongation factor SPT5 [Danio rerio]
CX249372.p.om.7	5	0.3	0.07	0.23	4.28571	ref|NP_001134884.1|	Ras-related protein Rab-37 [Salmo salar]_x0001_gb|ACI69298.1| Ras-related protein Rab-37 [Salmo salar]
CX721681.p.om.7	5	0.3	0.07	0.23	4.28571	ref|NP_001128156.1|	low-density lipoprotein receptor-related protein 6 [Danio rerio]_x0001_gb|ACB38032.1| low density lipoprotein receptor-related protein 6 [Danio rerio]
CA349052.p.om.7	14	0.47	0.11	0.35	4.27273	ref|NP_001134866.1|	regucalcin [Salmo salar]_x0001_gb|ACI69215.1| Regucalcin [Salmo salar]_x0001_gb|ACN10357.1| Regucalcin [Salmo salar]_x0001_gb|ACN12717.1| Regucalcin [Salmo salar]
CA378230.p.om.7	5	0.17	0.04	0.13	4.25	ref|NP_001134922.1|	OB DNA-binding domain-containing protein C16orf175 [Salmo salar]_x0001_gb|ACI69481.1| OB DNA-binding domain-containing protein C16orf175 [Salmo salar]
CB492689.p.om.7	5	0.17	0.04	0.13	4.25	gb|ACI66551.1|	Growth arrest and DNA-damage-inducible protein GADD45 alpha [Salmo salar]
CX720065.p.om.7	24	1.4	0.33	1.07	4.24242	gb|AAS92270.1|	receptor tyrosine kinase Kdr [Danio rerio]
CX037195.p.om.7	52	3.07	0.73	2.34	4.20548	ref|NP_001134842.1|	probable signal peptidase complex subunit 2 [Salmo salar]_x0001_gb|ACI69108.1| Probable signal peptidase complex subunit 2 [Salmo salar]
BX085754.p.om.7	5	0.21	0.05	0.16	4.2	ref|NP_999944.1|	nuclear receptor subfamily 5, group A, member 5 isoform 1 [Danio rerio]_x0001_gb|AAK19303.1|AF327373_1 Ff1c [Danio rerio]
BX298990.p.om.7	5	0.21	0.05	0.16	4.2	ref|NP_001020657.1|	transcription cofactor vestigial-like protein 2 [Danio rerio]_x0001_gb|AAH97200.1| Si:dkeyp-93d12.1 [Danio rerio]
BX309969.p.om.7	5	0.21	0.05	0.16	4.2	ref|NP_001133441.1|	N-acetyltransferase ESCO1 [Salmo salar]_x0001_gb|ACI33242.1| N-acetyltransferase ESCO1 [Salmo salar]
CU072473.p.om.7	5	0.21	0.05	0.16	4.2	ref|NP_001134147.1|	D-tyrosyl-tRNATyr deacylase 1 [Salmo salar]_x0001_gb|ACI66368.1| D-tyrosyl-tRNATyr deacylase 1 [Salmo salar]
CX253477.p.om.7	33	2.35	0.56	1.79	4.19643	ref|NP_001167226.1|	GH3 domain-containing protein [Salmo salar]_x0001_gb|ACN11137.1| GH3 domain-containing protein precursor [Salmo salar]
BX306192.p.om.7	14	0.67	0.16	0.51	4.1875	ref|NP_001158513.1|	programmed cell death 6 [Oncorhynchus mykiss]_x0001_gb|ACM24765.1| programmed cell death 6 [Oncorhynchus mykiss]
GE824150.p.om.7	52	2.8	0.67	2.13	4.1791	gb|AAK31583.1|	heat shock protein 70 [Ambystoma mexicanum]
BX321584.p.om.7	5	0.25	0.06	0.2	4.16667	gb|ACI33702.1|	WD repeat-containing protein 3 [Salmo salar]
BX876712.p.om.7	5	0.25	0.06	0.2	4.16667	gb|ACN60293.1|	Neutral and basic amino acid transport protein rBAT [Salmo salar]
BX889393.p.om.7	5	0.25	0.06	0.19	4.16667	ref|NP_001139748.1|	neutral cholesterol ester hydrolase 1 isoform a [Homo sapiens]
BX913521.p.om.7	5	0.25	0.06	0.19	4.16667	gb|EDL75901.1|	rCG47007 [Rattus norvegicus]
DV198599.p.om.7	14	3.3	0.8	2.5	4.125	gb|ADH10375.1|	ribosomal protein L18a [Ailuropoda melanoleuca]_x0001_gb|ADH10376.1| ribosomal protein L18a [Ailuropoda melanoleuca]
BX862680.p.om.7	9	0.49	0.12	0.36	4.08333	ref|NP_001072068.1|	noggin4 [Takifugu rubripes]_x0001_gb|AAX07475.1| noggin4 [Takifugu rubripes]
CB494303.p.om.7	18	0.49	0.12	0.36	4.08333	dbj|BAC97834.1|	glutamyl-prolyl-tRNA synthetase [Oryzias latipes]
CA373040.p.om.7	9	0.57	0.14	0.42	4.07143	gb|ACN11066.1|	Sodium- and chloride-dependent GABA transporter 2 [Salmo salar]
CX146854.p.om.7	23	1.26	0.31	0.95	4.06452	gb|ACN10350.1|	Splicing factor, arginine/serine-rich 2 [Salmo salar]_x0001_gb|ACN12710.1| Splicing factor, arginine/serine-rich 2 [Salmo salar]
BX860257.p.om.7	32	2.27	0.56	1.71	4.05357	gb|ACI67927.1|	Retinol dehydrogenase 3 [Salmo salar]
BX858750.p.om.7	37	1.54	0.38	1.16	4.05263	ref|NP_001154012.1|	Preimplantation protein 3 [Oncorhynchus mykiss]_x0001_gb|ACO07524.1| Preimplantation protein 3 [Oncorhynchus mykiss]
CX147450.p.om.7	14	0.85	0.21	0.64	4.04762	ref|NP_001133247.1|	cysteine protease ATG4B [Salmo salar]_x0001_gb|ACI32896.1| Cysteine protease ATG4B [Salmo salar]_x0001_gb|ACN10444.1| Cysteine protease ATG4B [Salmo salar]
CA384162.p.om.7	110	16.91	4.19	12.7	4.0358	gb|ACN09954.1|	40S ribosomal protein S28 [Salmo salar]_x0001_gb|ACN12301.1| 40S ribosomal protein S28 [Salmo salar]
BX856164.p.om.7	23	1.17	0.29	0.88	4.03448	ref|NP_001140091.1|	Clathrin light chain B [Salmo salar]_x0001_gb|ACM09625.1| Clathrin light chain B [Salmo salar]
CA369146.p.om.7	23	1.25	0.31	0.94	4.03226	gb|ACI69753.1|	D-dopachrome decarboxylase [Salmo salar]
BX084205.p.om.7	4	0.12	0.03	0.08	4	ref|NP_001092232.1|	homeobox protein CDX-1 [Danio rerio]_x0001_gb|AAW83121.1| caudal type homeodomain protein [Danio rerio]_x0001_gb|AAI42878.1| Cdx1b protein [Danio rerio]
BX085642.p.om.7	5	0.2	0.05	0.16	4	emb|CAQ14162.1|	novel zinc finger protein [Danio rerio]
BX087829.p.om.7	9	0.56	0.14	0.42	4	gb|ACN58732.1|	ATPase family AAA domain-containing protein 2 [Salmo salar]
BX300601.p.om.7	23	1.16	0.29	0.87	4	gb|AAI54304.1|	Methyltransferase like 3 [Danio rerio]
BX878468.p.om.7	23	1.28	0.32	0.97	4	ref|NP_958905.1|	endophilin-A2 [Danio rerio]_x0001_gb|AAH45942.1| SH3-domain GRB2-like 1b [Danio rerio]_x0001_gb|AAI64167.1| Sh3gl1b protein [Danio rerio]_x0001_emb|CAX14575.1| SH3-domain GRB2-like 1b [Danio rerio]
BX880936.p.om.7	9	0.36	0.09	0.27	4	ref|NP_001167250.1|	cAMP-responsive element-binding protein 3-like protein 2 [Salmo salar]_x0001_gb|ACN11194.1| cAMP-responsive element-binding protein 3-like protein 2 [Salmo salar]
CA343386.p.om.7	9	0.44	0.11	0.33	4	ref|NP_001171041.1|	zinc finger protein 616 [Mus musculus]
CA353039.p.om.7	5	0.12	0.03	0.09	4	ref|NP_778207.1|	dual specificity protein kinase Ttk [Danio rerio]_x0001_gb|AAN61408.1|AF488735_1 Mps1 [Danio rerio]
CA354555.p.om.7	5	0.08	0.02	0.06	4	emb|CAM46948.1|	DNA (cytosine-5-)-methyltransferase 3 [Danio rerio]
CA374906.p.om.7	5	0.08	0.02	0.06	4	ref|NP_001118134.1|	Rhesus blood group family type B glycoprotein [Oncorhynchus mykiss]_x0001_gb|ABO16485.1| RhBGa [Oncorhynchus mykiss]_x0001_gb|ABO16486.1| RhBGb [Oncorhynchus mykiss]
CA378966.p.om.7	9	0.56	0.14	0.42	4	gb|EU221178.1|	Salmo salar clone 257A09 TCR gamma locus region
CB491260.p.om.7	14	0.4	0.1	0.3	4	gb|ACN10330.1|	Glycine cleavage system H protein, mitochondrial precursor [Salmo salar]_x0001_gb|ACN12690.1| Glycine cleavage system H protein, mitochondrial precursor [Salmo salar]
CT565354.p.om.7	4	0.12	0.03	0.08	4	gb|AAU07866.1|	cytochrome b [Oncorhynchus mykiss]
CU066332.p.om.7	5	0.16	0.04	0.13	4	ref|NP_001134907.1|	Zinc finger protein 572 [Salmo salar]_x0001_gb|ACI69402.1| Zinc finger protein 572 [Salmo salar]
CU073199.p.om.7	5	0.16	0.04	0.13	4	ref|NP_001117823.1|	gonadotropin-releasing hormone receptor [Oncorhynchus mykiss]_x0001_emb|CAB93351.1| gonadotropin-releasing hormone receptor [Oncorhynchus mykiss]
FM180056.p.om.7	4	0.08	0.02	0.06	4	ref|NP_001153964.1|	NILT2 leukocyte receptor [Oncorhynchus mykiss]_x0001_emb|CAQ77254.1| NILT2 leukocyte receptor precursor [Oncorhynchus mykiss]
GE822762.p.om.7	18	0.8	0.2	0.59	4	gb|ACO07709.1|	Reticulon-3 [Oncorhynchus mykiss]
CU072454.p.om.7	27	0.95	0.24	0.71	3.95833	gb|ACO13643.1|	YEATS domain-containing protein 4 [Esox lucius]
BX878677.p.om.7	18	0.91	0.23	0.68	3.95652	ref|NP_001135216.1|	Deoxyhypusine synthase [Salmo salar]_x0001_gb|ACI33383.1| Deoxyhypusine synthase [Salmo salar]
BX300699.p.om.7	18	0.83	0.21	0.62	3.95238	gb|AAI54208.1|	Choroideremia [Danio rerio]
GE834678.p.om.7	63	3.39	0.86	2.53	3.94186	gb|ACO08548.1|	Transcription elongation factor B polypeptide 1 [Oncorhynchus mykiss]
CX068543.p.om.7	18	1.73	0.44	1.29	3.93182	ref|YP_001568974.1|	cytochrome c oxidase subunit II [Salmo trutta trutta]_x0001_emb|CAP40322.1| cytochrome c oxidase subunit II [Salmo trutta trutta]
CA347099.p.om.7	18	1.02	0.26	0.76	3.92308	gb|ACM09771.1|	Programmed cell death protein 10 [Salmo salar]
BX299418.p.om.7	103	4.94	1.26	3.68	3.92063	ref|NP_001167300.1|	Tuftelin-interacting protein 11 [Salmo salar]_x0001_gb|ACN11319.1| Tuftelin-interacting protein 11 [Salmo salar]
BX318430.p.om.7	9	0.47	0.12	0.35	3.91667	gb|ACI34025.1|	Splicing factor, arginine/serine-rich 2 [Salmo salar]_x0001_gb|ACI66931.1| Splicing factor, arginine/serine-rich 2 [Salmo salar]
BX870456.p.om.7	9	0.47	0.12	0.35	3.91667	gb|EDM09524.1|	rCG46571 [Rattus norvegicus]
BX874084.p.om.7	9	0.47	0.12	0.35	3.91667	gb|ACO13643.1|	YEATS domain-containing protein 4 [Esox lucius]
CU074100.p.om.7	13	0.35	0.09	0.26	3.88889	gb|ACI33702.1|	WD repeat-containing protein 3 [Salmo salar]
CX035855.p.om.7	9	1.01	0.26	0.75	3.88462	gb|AAH78082.1|	HBXAP protein [Xenopus laevis]
BX873120.p.om.7	22	0.62	0.16	0.46	3.875	gb|EDM08409.1|	threonyl-tRNA synthetase-like 2, isoform CRA_b [Rattus norvegicus]
CA380920.p.om.7	31	2.05	0.53	1.52	3.86792	ref|NP_001167053.1|	Serine/threonine-protein kinase 17B [Salmo salar]_x0001_gb|ACN10696.1| Serine/threonine-protein kinase 17B [Salmo salar]
BX309599.p.om.7	9	0.54	0.14	0.41	3.85714	gb|ACO07549.1|	Ubiquinol-cytochrome c reductase iron-sulfur subunit, mitochondrial precursor [Oncorhynchus mykiss]
BX871003.p.om.7	9	0.5	0.13	0.37	3.84615	gb|ACI70054.1|	FK506-binding protein 11 precursor [Salmo salar]_x0001_gb|ACO11647.1| FK506-binding protein 11 precursor [Caligus rogercresseyi]
CR943239.p.om.7	9	0.46	0.12	0.34	3.83333	ref|NP_956416.1|	gamma-tubulin complex component 2 [Danio rerio]_x0001_gb|AAH54908.1| Tubulin, gamma complex associated protein 2 [Danio rerio]
BX298232.p.om.7	13	0.76	0.2	0.56	3.8	ref|NP_001134478.1|	Prefoldin subunit 3 [Salmo salar]_x0001_gb|ACI67676.1| Prefoldin subunit 3 [Salmo salar]
BX309690.p.om.7	9	0.38	0.1	0.28	3.8	ref|NP_001034151.1|	mediator of RNA polymerase II transcription subunit 24 [Danio rerio]_x0001_gb|ABC17786.1| 100 kDa thyroid hormone receptor associated protein [Danio rerio]
CU074699.p.om.7	9	0.53	0.14	0.4	3.78571	ref|NP_957456.1|	ligatin [Danio rerio]_x0001_gb|AAH55196.1| Ligatin [Danio rerio]
BX307535.p.om.7	13	0.68	0.18	0.5	3.77778	emb|CAM21132.1|	novel KRAB box and zinc finger, C2H2 type domain containing protein [Mus musculus]
CU071649.p.om.7	17	0.49	0.13	0.35	3.76923	gb|AAA86646.2|	glutamate receptor AMPA/kainate type [Morone chrysops x Morone saxatilis]
BX297650.p.om.7	4	0.15	0.04	0.1	3.75	ref|NP_001133124.1|	muscle specific ring finger protein 1-like [Salmo salar]_x0001_gb|ACH70731.1| muscle specific ring finger protein 1-like [Salmo salar]
BX298552.p.om.7	4	0.15	0.04	0.1	3.75	gb|ACO08226.1|	Cytochrome c oxidase copper chaperone [Oncorhynchus mykiss]_x0001_gb|ACO08431.1| Cytochrome c oxidase copper chaperone [Oncorhynchus mykiss]_x0001_gb|ACO08735.1| Cytochrome c oxidase copper chaperone [Oncorhynchus mykiss]
BX305272.p.om.7	4	0.15	0.04	0.1	3.75	ref|NP_001159802.1|	prostaglandin E receptor 1, subtype EP1b [Danio rerio]_x0001_gb|ACX47464.1| prostaglandin E receptor 1 subtype EP1b precursor-like protein [Danio rerio]
BX313340.p.om.7	9	0.3	0.08	0.22	3.75	dbj|AB195692.1|	Gallus gallus CAF-1p150 mRNA for chromatin assembly factor-1p150, complete cds
CX722527.p.om.7	13	0.75	0.2	0.55	3.75	gb|EAW50433.1|	phosphoribosyl pyrophosphate synthetase-associated protein 2, isoform CRA_b [Homo sapiens]
BX076199.p.om.7	39	1.98	0.53	1.45	3.73585	dbj|BAD90027.1|	heat shock 70kDa protein 8 isoform b [Oncorhynchus mykiss]
BX863581.p.om.7	13	0.41	0.11	0.3	3.72727	ref|NP_001165345.1|	sentrin specific protease 1b [Xenopus laevis]_x0001_dbj|BAI47564.1| sentrin specific protease 1b [Xenopus laevis]
BX309530.p.om.7	13	1.08	0.29	0.79	3.72414	ref|NP_001108523.1|	si:dkey-5i22.6 [Danio rerio]_x0001_gb|AAI54804.1| Si:dkey-5i22.6 protein [Danio rerio]
BX086661.p.om.7	30	1.41	0.38	1.03	3.71053	gb|ACO08332.1|	Mitochondrial 28S ribosomal protein S14 [Oncorhynchus mykiss]
BX075620.p.om.7	13	0.59	0.16	0.44	3.6875	emb|BX936077.2|	Gallus gallus finished cDNA, clone ChEST488f17
BX304872.p.om.7	21	0.81	0.22	0.58	3.68182	gb|ACN11309.1|	U2 small nuclear ribonucleoprotein B [Salmo salar]
CA344080.p.om.7	1330	55.59	15.13	40.5	3.67416	gb|ACO07574.1|	40S ribosomal protein S18 [Oncorhynchus mykiss]
CF752739.p.om.7	869	94.68	25.79	68.9	3.67119	gb|ADD24466.1|	Ubiquitin [Lepeophtheirus salmonis]
AJ347728.p.om.7	4	0.11	0.03	0.08	3.66667	ref|NP_001117843.1|	dopamine D2 receptor 1 [Oncorhynchus mykiss]_x0001_emb|CAC87873.1| dopamine D2 receptor 1 [Oncorhynchus mykiss]
BX310201.p.om.7	4	0.22	0.06	0.15	3.66667	ref|NP_001154055.1|	NTF2-related export protein 2 [Oncorhynchus mykiss]_x0001_gb|ACO07687.1| NTF2-related export protein 2 [Oncorhynchus mykiss]
BX313041.p.om.7	4	0.11	0.03	0.08	3.66667	emb|CAQ13425.1|	prostaglandin E synthase 2-like [Danio rerio]
BX878972.p.om.7	4	0.11	0.03	0.08	3.66667	gb|AAI29460.1|	Src homology 2 domain containing transforming protein D [Danio rerio]
CA354729.p.om.7	4	0.11	0.03	0.07	3.66667	ref|NP_001117099.1|	fructose-bisphosphate aldolase B [Salmo salar]_x0001_gb|AAD11573.1| aldolase B [Salmo salar]_x0001_gb|ACI68048.1| Fructose-bisphosphate aldolase B [Salmo salar]_x0001_gb|ACI70174.1| Fructose-bisphosphate aldolase B [Salmo salar]
CA368448.p.om.7	4	0.22	0.06	0.15	3.66667	dbj|BAD12391.1|	aggrecan [Danio rerio]
CU070857.p.om.7	13	0.66	0.18	0.48	3.66667	gb|AAH96996.1|	Solute carrier family 30 (zinc transporter), member 5 [Danio rerio]_x0001_gb|AAI65204.1| Slc30a5 protein [Danio rerio]
BX080029.p.om.7	17	0.99	0.27	0.72	3.66667	gb|ACO08082.1|	Proteasome subunit alpha type 2 [Oncorhynchus mykiss]
BX912124.p.om.7	312	14.21	3.92	10.3	3.625	ref|NP_001133384.1|	40S ribosomal protein S2 [Salmo salar]_x0001_gb|ACH70782.1| ribosomal protein S2 [Salmo salar]_x0001_gb|ACI33131.1| 40S ribosomal protein S2 [Salmo salar]_x0001_gb|ACI66121.1| 40S ribosomal protein S2 [Salmo salar]_x0001_gb|ACI66248.1| 40S ribosomal protein S2 [Salmo salar]_x0001_gb|ACI70182.1| 40S ribosomal protein S2 [Salmo salar]_x0001_gb|ACN09907.1| 40S ribosomal protein S2 [Salmo salar]_x000…
CR376555.p.om.7	4	0.29	0.08	0.2	3.625	gb|ACO13480.1|	Exosome complex exonuclease RRP41 [Esox lucius]
CU071639.p.om.7	17	0.47	0.13	0.34	3.61538	gb|ACN60280.1|	NADP transhydrogenase, mitochondrial precursor [Salmo salar]
CT571878.p.om.7	17	1.3	0.36	0.94	3.61111	emb|CAP08935.1|	fish virus induced TRIM protein [Oncorhynchus mykiss]
BX314683.p.om.7	21	1.01	0.28	0.73	3.60714	ref|NP_001112364.1|	serine/threonine-protein kinase PLK4 [Danio rerio]
BX874163.p.om.7	17	0.54	0.15	0.4	3.6	gb|AAH67600.1|	Prmt6 protein [Danio rerio]
CA348791.p.om.7	67	4.86	1.35	3.51	3.6	ref|NP_001155062.1|	anoctamin-1 [Danio rerio]
BX075992.p.om.7	4	0.18	0.05	0.13	3.6	ref|NP_998689.1|	DNA mismatch repair protein Msh2 [Danio rerio]_x0001_gb|AAH44370.1| MutS homolog 2 (E. coli) [Danio rerio]
BX076930.p.om.7	4	0.18	0.05	0.13	3.6	ref|NP_001133097.1|	ubiquitin-conjugating enzyme E2G 1 [Salmo salar]_x0001_gb|ACH70687.1| ubiquitin-conjugating enzyme E2G 1 [Salmo salar]_x0001_gb|ACM09093.1| Ubiquitin-conjugating enzyme E2 G1 [Salmo salar]
BX311779.p.om.7	4	0.18	0.05	0.13	3.6	ref|NP_001133098.1|	conserved oligomeric Golgi complex subunit 2 [Salmo salar]_x0001_gb|ACH70688.1| component of oligomeric golgi complex 2 [Salmo salar]
BX888556.p.om.7	4	0.18	0.05	0.13	3.6	gb|ACO14366.1|	Mitochondrial 39S ribosomal protein L4 [Esox lucius]
BX909711.p.om.7	4	0.18	0.05	0.13	3.6	gb|ACO13517.1|	39S ribosomal protein L17, mitochondrial precursor [Esox lucius]
BX913282.p.om.7	4	0.18	0.05	0.13	3.6	ref|NP_001005571.1|	cytochrome P450, family 8, subfamily B [Gallus gallus]
CA359419.p.om.7	8	0.18	0.05	0.13	3.6	gb|ACN60267.1|	DNA topoisomerase 2-alpha [Salmo salar]
CT962914.p.om.7	22223	2167.46	603.24	1560	3.59303	gb|ACO08020.1|	Hemoglobin subunit beta-4 [Oncorhynchus mykiss]_x0001_gb|ACO08038.1| Hemoglobin subunit beta-4 [Oncorhynchus mykiss]
BX076244.p.om.7	17	0.79	0.22	0.57	3.59091	ref|NP_001167056.1|	Periodic tryptophan protein 2 homolog [Salmo salar]_x0001_gb|ACN10705.1| Periodic tryptophan protein 2 homolog [Salmo salar]
CA357855.p.om.7	155	8.29	2.31	5.98	3.58874	ref|NP_001133605.1|	T-complex protein 1 subunit beta [Salmo salar]_x0001_gb|ACI33559.1| T-complex protein 1 subunit beta [Salmo salar]
CU072977.p.om.7	13	0.43	0.12	0.32	3.58333	ref|NP_001134438.1|	Dehydrogenase/reductase SDR family member 4 [Salmo salar]_x0001_gb|ACI67513.1| Dehydrogenase/reductase SDR family member 4 [Salmo salar]
BX302737.p.om.7	21	1	0.28	0.73	3.57143	gb|ACI70073.1|	Deoxyribonuclease gamma precursor [Salmo salar]
BX309050.p.om.7	4	0.25	0.07	0.17	3.57143	ref|NP_919395.1|	matrix metalloproteinase 14b (membrane-inserted) [Danio rerio]_x0001_gb|AAP74484.1| membrane-type matrix metalloproteinase 1 beta [Danio rerio]
BX883485.p.om.7	4	0.25	0.07	0.18	3.57143	gb|AAI34233.1|	Hmha1 protein [Danio rerio]
CA346826.p.om.7	4	0.25	0.07	0.17	3.57143	emb|CAX14075.1|	novel protien similar to H.sapiens FAM83H, family with sequence similarity 83, member H (FAM83H) [Danio rerio]
CA349064.p.om.7	4	0.25	0.07	0.17	3.57143	ref|NP_001167336.1|	Prolyl endopeptidase [Salmo salar]_x0001_gb|ACN11407.1| Prolyl endopeptidase [Salmo salar]
CA351351.p.om.7	4	0.25	0.07	0.18	3.57143	ref|NP_001101111.1|	single-minded homolog 1 [Rattus norvegicus]_x0001_gb|EDL99652.1| single-minded 1 (predicted) [Rattus norvegicus]
CA376364.p.om.7	4	0.25	0.07	0.17	3.57143	emb|CAM60062.1|	boc [Danio rerio]
CB493668.p.om.7	4	0.25	0.07	0.18	3.57143	emb|CAG25715.1|	paired box protein 7 [Salvelinus alpinus]
CU072831.p.om.7	8	0.25	0.07	0.18	3.57143	ref|NP_958895.1|	dihydrolipoyllysine-residue succinyltransferase component of 2-oxoglutarate dehydrogenase complex, mitochondrial [Danio rerio]_x0001_gb|AAH45500.1| Dihydrolipoamide S-succinyltransferase [Danio rerio]
BX077117.p.om.7	29	1.32	0.37	0.94	3.56757	gb|ACI33791.1|	Ras-related C3 botulinum toxin substrate 1 precursor [Salmo salar]_x0001_gb|ACM08920.1| Ras-related C3 botulinum toxin substrate 1 precursor [Salmo salar]_x0001_gb|ACN10463.1| Ras-related C3 botulinum toxin substrate 1 precursor [Salmo salar]
BX303547.p.om.7	8	0.32	0.09	0.23	3.55556	gb|ADD38855.1|	SUMO-conjugating enzyme UBC9-B [Lepeophtheirus salmonis]
BX315620.p.om.7	4	0.32	0.09	0.22	3.55556	ref|NM_001081092.1|	Mus musculus TAF4A RNA polymerase II, TATA box binding protein (TBP)-associated factor (Taf4a), mRNA
CA383610.p.om.7	4	0.32	0.09	0.22	3.55556	gb|ACI29016.1|	semaphorin 4a [Danio rerio]
CB490807.p.om.7	4	0.32	0.09	0.22	3.55556	emb|BX930659.2|	Gallus gallus finished cDNA, clone ChEST373j24
BX310587.p.om.7	50	2.27	0.64	1.64	3.54688	gb|ACO14498.1|	Zinc finger protein Gfi-1b [Esox lucius]
BX318492.p.om.7	8	0.39	0.11	0.27	3.54545	ref|NP_001167352.1|	pre-mRNA-processing factor 19 [Salmo salar]_x0001_gb|ACN11451.1| Pre-mRNA-processing factor 19 [Salmo salar]
CR373019.p.om.7	25	1.27	0.36	0.91	3.52778	ref|NP_001166162.1|	zinc finger protein 573 isoform 4 [Homo sapiens]
BX086204.p.om.7	4	0.28	0.08	0.2	3.5	ref|NP_001018175.1|	F-box/WD repeat-containing protein 2 [Danio rerio]_x0001_gb|AAH95232.1| F-box and WD repeat domain containing 2 [Danio rerio]
BX307154.p.om.7	4	0.14	0.04	0.1	3.5	ref|NP_001158633.1|	Heterogeneous nuclear ribonucleoprotein A0 [Oncorhynchus mykiss]_x0001_gb|ACO08567.1| Heterogeneous nuclear ribonucleoprotein A0 [Oncorhynchus mykiss]
BX908948.p.om.7	4	0.14	0.04	0.1	3.5	emb|CAJ81368.1|	kinetochore associated 1 [Xenopus tropicalis]
CA347419.p.om.7	4	0.07	0.02	0.05	3.5	ref|NP_001133314.1|	BNIP2 motif-containing molecule at the C-terminal region 1 [Salmo salar]_x0001_gb|ACI33014.1| BNIP2 motif-containing molecule at the C-terminal region 1 [Salmo salar]
CA350124.p.om.7	4	0.28	0.08	0.19	3.5	gb|ACO13863.1|	DNA-directed RNA polymerase II subunit RPB3 [Esox lucius]
CA354610.p.om.7	4	0.56	0.16	0.39	3.5	ref|XP_002662303.1|	PREDICTED: histone-lysine N-methyltransferase SETD1B-A-like [Danio rerio]
CB493796.p.om.7	4	0.14	0.04	0.1	3.5	gb|ACI68623.1|	Apolipoprotein A-IV precursor [Salmo salar]
CU063691.p.om.7	4	0.14	0.04	0.1	3.5	gb|ABF22473.1|	oxysterol-binding protein-like protein 3 [Takifugu rubripes]
CU065055.p.om.7	4	0.28	0.08	0.19	3.5	gb|ACI33503.1|	5-aminolevulinate synthase, nonspecific, mitochondrial precursor [Salmo salar]
CU073382.p.om.7	4	0.14	0.04	0.1	3.5	gb|FJ607781.1|	Oncorhynchus mykiss CD86 membrane protein long isoform (CD86) gene, complete cds
CX036926.p.om.7	4	0.14	0.04	0.1	3.5	gb|ACM08981.1|	Mediator of RNA polymerase II transcription subunit 10 [Salmo salar]
BX080503.p.om.7	4	0.21	0.06	0.15	3.5	gb|ACI67337.1|	Vesicle-associated membrane protein 8 [Salmo salar]
BX306893.p.om.7	4	0.21	0.06	0.15	3.5	ref|NP_001003465.1|	hypothetical protein LOC445071 [Danio rerio]_x0001_gb|AAH78388.1| Zgc:92417 [Danio rerio]
BX314503.p.om.7	4	0.21	0.06	0.15	3.5	ref|NP_001167383.1|	histone-lysine N-methyltransferase PRDM9 [Salmo salar]_x0001_gb|ACN10800.1| PR domain zinc finger protein 9 [Salmo salar]
BX855841.p.om.7	4	0.21	0.06	0.15	3.5	gb|AAC33526.2|	pol polyprotein [Takifugu rubripes]
BX866031.p.om.7	4	0.21	0.06	0.15	3.5	gb|AAV32965.1|	tumor protein p53 binding protein [Oncorhynchus mykiss]
BX881311.p.om.7	4	0.21	0.06	0.15	3.5	gb|AAI62471.1|	Dacha protein [Danio rerio]
CA345564.p.om.7	4	0.21	0.06	0.15	3.5	dbj|BAD94509.2|	peroxisome proliferator-activated receptor gamma [Oncorhynchus keta]
CA348066.p.om.7	4	0.21	0.06	0.15	3.5	gb|ACF77004.1|	C-lectin-A [Dicentrarchus labrax]
CA364774.p.om.7	8	0.42	0.12	0.29	3.5	ref|NP_001167437.1|	NEDD8-conjugating enzyme UBE2F [Salmo salar]_x0001_gb|ACN11478.1| NEDD8-conjugating enzyme UBE2F [Salmo salar]
CR370896.p.om.7	4	0.21	0.06	0.15	3.5	gb|BC167760.1|	Rattus norvegicus cDNA clone IMAGE:7385240, containing frame-shift errors
CR371119.p.om.7	4	0.21	0.06	0.15	3.5	ref|NP_001079101.1|	single-minded homolog 2 [Xenopus laevis]_x0001_gb|AAG42690.1| single-minded [Xenopus laevis]
CR372485.p.om.7	4	0.21	0.06	0.15	3.5	ref|NP_001158798.1|	Transmembrane protein 16H [Salmo salar]_x0001_gb|ACN10494.1| Transmembrane protein 16H [Salmo salar]
CX040636.p.om.7	4	0.21	0.06	0.15	3.5	ref|NP_001074078.1|	sal-like protein 4 [Danio rerio]_x0001_gb|ABK51385.1| zinc finger transcription factor 24hpf [Danio rerio]
CX722172.p.om.7	8	0.35	0.1	0.24	3.5	ref|NP_001014108.2|	testis-specific serine/threonine-protein kinase 5 [Rattus norvegicus]_x0001_gb|EDM15976.1| similar to serine/threonine kinase 22A (spermiogenesis associated); testis-specific serine/threonine kinase [Rattus norvegicus]
CA349729.p.om.7	57	2.23	0.64	1.58	3.48438	gb|ACO13434.1|	Vesicle-trafficking protein SEC22b-B [Esox lucius]
CX721841.p.om.7	12	0.66	0.19	0.46	3.47368	ref|NP_001013042.1|	ubiquitin carboxyl-terminal hydrolase 13 [Mus musculus]_x0001_gb|AAH90999.1| Ubiquitin specific peptidase 13 (isopeptidase T-3) [Mus musculus]_x0001_gb|EDL35015.1| ubiquitin specific peptidase 13 (isopeptidase T-3) [Mus musculus]
BX076166.p.om.7	8	0.38	0.11	0.26	3.45455	ref|NP_001154035.1|	Zinc finger protein OZF [Oncorhynchus mykiss]_x0001_gb|ACO07608.1| Zinc finger protein OZF [Oncorhynchus mykiss]
BX080202.p.om.7	4	0.38	0.11	0.27	3.45455	emb|CR388941.1|	Gallus gallus finished cDNA, clone ChEST757d3
BX300848.p.om.7	8	0.38	0.11	0.27	3.45455	gb|ACN60273.1|	Exocyst complex component 2 [Salmo salar]
BX881541.p.om.7	8	0.38	0.11	0.26	3.45455	gb|AAH98594.1|	Mybbp1a protein [Danio rerio]
CB487203.p.om.7	4	0.38	0.11	0.27	3.45455	emb|CAQ14531.1|	polo-like kinase 3 (Drosophila) [Danio rerio]
CX027871.p.om.7	4	0.38	0.11	0.27	3.45455	ref|NP_001133810.1|	Zinc finger protein 214 [Salmo salar]_x0001_gb|ACI33936.1| Zinc finger protein 214 [Salmo salar]
GE827535.p.om.7	264	13.19	3.82	9.36	3.45288	gb|ACO08784.1|	Iron-sulfur assembly protein IscA-like 2, mitochondrial precursor [Oncorhynchus mykiss]
CX036796.p.om.7	12	0.69	0.2	0.49	3.45	gb|ACI69073.1|	Ubiquitin-conjugating enzyme E2 C [Salmo salar]_x0001_gb|ACN09931.1| Ubiquitin-conjugating enzyme E2 C [Salmo salar]_x0001_gb|ACN12278.1| Ubiquitin-conjugating enzyme E2 C [Salmo salar]
BX303030.p.om.7	24	1	0.29	0.7	3.44828	gb|ACO13741.1|	Peptidyl-prolyl cis-trans isomerase NIMA-interacting 4 [Esox lucius]
CB488524.p.om.7	4	0.31	0.09	0.22	3.44444	ref|XP_002044751.1|	GM19716 [Drosophila sechellia]_x0001_ref|XP_002045156.1| GM19316 [Drosophila sechellia]_x0001_gb|EDW55916.1| GM19316 [Drosophila sechellia]_x0001_gb|EDW56424.1| GM19716 [Drosophila sechellia]
BX914048.p.om.7	12	0.55	0.16	0.39	3.4375	emb|CAI22668.1|	chromosome 1 open reading frame 83 [Homo sapiens]
CA365071.p.om.7	8	0.24	0.07	0.17	3.42857	ref|NP_958456.1|	trans-2,3-enoyl-CoA reductase [Danio rerio]_x0001_gb|AAH53209.1| Glycoprotein, synaptic 2 [Danio rerio]_x0001_gb|AAI64083.1| Gpsn2 protein [Danio rerio]_x0001_emb|CAX14489.1| glycoprotein, synaptic 2 [Danio rerio]
CA367782.p.om.7	4	0.24	0.07	0.17	3.42857	gb|EDM12189.1|	transient receptor potential cation channel, subfamily M, member 5 (predicted), isoform CRA_b [Rattus norvegicus]
CB491559.p.om.7	4	0.24	0.07	0.17	3.42857	gb|EDM14548.1|	RNA binding motif protein 22, isoform CRA_a [Rattus norvegicus]
CU071285.p.om.7	8	0.24	0.07	0.17	3.42857	ref|NP_942109.2|	zinc fingers and homeoboxes protein 2 [Danio rerio]_x0001_gb|AAI41783.1| Zhx2 protein [Danio rerio]
CX149685.p.om.7	4	0.24	0.07	0.17	3.42857	ref|NP_001008619.1|	probable 2-oxoglutarate dehydrogenase E1 component DHKTD1, mitochondrial [Danio rerio]_x0001_gb|AAH86742.1| Dehydrogenase E1 and transketolase domain containing 1 [Danio rerio]
CX257359.p.om.7	4	0.48	0.14	0.33	3.42857	emb|CAQ14367.1|	finTRIM family protein [Danio rerio]
BX309014.p.om.7	12	0.41	0.12	0.29	3.41667	ref|NP_001135032.1|	ribonuclease P protein subunit p30 [Salmo salar]_x0001_gb|ACI69952.1| Ribonuclease P protein subunit p30 [Salmo salar]
BX864789.p.om.7	8	0.41	0.12	0.29	3.41667	ref|NP_001167119.1|	cleavage stimulation factor subunit 3 [Salmo salar]_x0001_gb|ACN10875.1| Cleavage stimulation factor 77 kDa subunit [Salmo salar]
CB497337.p.om.7	12	0.41	0.12	0.29	3.41667	ref|NP_001008641.1|	ras-related protein Rab-25 [Danio rerio]_x0001_gb|AAH86715.1| RAB25, member RAS oncogene family [Danio rerio]
BX318405.p.om.7	24	1.16	0.34	0.82	3.41176	gb|ACO07982.1|	Density-regulated protein [Oncorhynchus mykiss]
CA351728.p.om.7	8	0.75	0.22	0.53	3.40909	dbj|BAF45912.1|	ribosomal protein S24 [Solea senegalensis]
BX886372.p.om.7	24	1.09	0.32	0.76	3.40625	ref|NP_001167324.1|	Ubiquitin-conjugating enzyme E2 Z [Salmo salar]_x0001_gb|ACN11361.1| Ubiquitin-conjugating enzyme E2 Z [Salmo salar]
CA367571.p.om.7	12	1.02	0.3	0.72	3.4	ref|NP_991278.1|	mitochondrial thiamine pyrophosphate carrier [Danio rerio]_x0001_gb|AAQ94578.1| solute carrier family 25 member 19 [Danio rerio]
BX321263.p.om.7	4	0.17	0.05	0.12	3.4	ref|NP_001170870.1|	ethanol induced 1 isoform 1 [Mus musculus]_x0001_emb|CAM28029.1| ethanol induced 1 [Mus musculus]
BX859897.p.om.7	16	0.85	0.25	0.6	3.4	gb|ACO13296.1|	39S ribosomal protein L48, mitochondrial precursor [Esox lucius]
CA342706.p.om.7	4	0.17	0.05	0.12	3.4	gb|ACO08876.1|	Chemokine receptor-like 1 [Osmerus mordax]
CA346322.p.om.7	4	0.17	0.05	0.12	3.4	ref|NP_001166970.1|	solute carrier family 23 member 1 [Danio rerio]
CA377852.p.om.7	4	0.17	0.05	0.12	3.4	ref|NP_001133989.1|	Proteinase-activated receptor 2 [Salmo salar]_x0001_gb|ACI34269.1| Proteinase-activated receptor 2 precursor [Salmo salar]_x0001_gb|ACJ05628.1| proteinase-activated receptor-2b [Salmo salar]
CB487170.p.om.7	4	0.17	0.05	0.12	3.4	gb|ACO09655.1|	Replication protein A 32 kDa subunit [Osmerus mordax]
CT568744.p.om.7	4	0.78	0.23	0.55	3.3913	ref|NP_001153918.1|	proteasome 26S subunit ATPase 3 [Oryzias latipes]_x0001_dbj|BAH37025.1| proteasome 26S subunit ATPase 3 [Oryzias latipes]
BX080664.p.om.7	56	3.96	1.17	2.79	3.38462	gb|ACN09951.1|	60S ribosomal protein L35a [Salmo salar]_x0001_gb|ACN10038.1| 60S ribosomal protein L35a [Salmo salar]_x0001_gb|ACN10273.1| 60S ribosomal protein L35a [Salmo salar]_x0001_gb|ACN12298.1| 60S ribosomal protein L35a [Salmo salar]_x0001_gb|ACN12385.1| 60S ribosomal protein L35a [Salmo salar]_x0001_gb|ACN12629.1| 60S ribosomal protein L35a [Salmo salar]
BX301540.p.om.7	4	0.27	0.08	0.19	3.375	gb|AAK30301.1|AF289866_1	haploid germ cell-specific nuclear protein kinase [Mus musculus]_x0001_gb|AAI13149.1| Germ cell-specific gene 2 [Mus musculus]_x0001_emb|CAQ51890.1| germ cell-specific gene 2 [Mus musculus]
CA352778.p.om.7	4	0.27	0.08	0.19	3.375	ref|XP_001363927.1|	PREDICTED: hypothetical protein [Monodelphis domestica]
CA376476.p.om.7	4	0.27	0.08	0.19	3.375	ref|NP_001134467.1|	Adenylate kinase [Salmo salar]_x0001_gb|ACH70899.1| adenylate kinase 1-1 [Salmo salar]_x0001_gb|ACI67646.1| Adenylate kinase [Salmo salar]
CB494737.p.om.7	4	0.27	0.08	0.19	3.375	ref|NP_001035071.1|	tripartite motif-containing 55b [Danio rerio]_x0001_gb|AAI14284.1| Tripartite motif-containing 55b [Danio rerio]
CR363436.p.om.7	4	0.27	0.08	0.19	3.375	gb|AAH03896.2|	Rpl17 protein [Mus musculus]
CX150513.p.om.7	4	0.27	0.08	0.19	3.375	ref|NP_001154133.1|	Eukaryotic translation initiation factor 5A-1 [Oncorhynchus mykiss]_x0001_gb|ACO07989.1| Eukaryotic translation initiation factor 5A-1 [Oncorhynchus mykiss]
CA376544.p.om.7	36	2.09	0.62	1.47	3.37097	gb|ACO09635.1|	Tumor necrosis factor receptor type 1-associated DEATH domain protein [Osmerus mordax]
CX033054.p.om.7	8	0.91	0.27	0.64	3.37037	ref|NP_001135165.1|	enigma LIM domain protein-like [Salmo salar]_x0001_gb|ACH70845.1| enigma LIM domain protein-like [Salmo salar]
CA344715.p.om.7	72	1.65	0.49	1.17	3.36735	ref|NP_001134752.1|	Actin-related protein 2/3 complex subunit 5 [Salmo salar]_x0001_gb|ACI68715.1| Actin-related protein 2/3 complex subunit 5 [Salmo salar]_x0001_gb|ACM09843.1| Actin-related protein 2/3 complex subunit 5 [Salmo salar]
BX306912.p.om.7	809	40.97	12.18	28.8	3.36371	gb|ACO08565.1|	ATP synthase D chain, mitochondrial [Oncorhynchus mykiss]
BX912019.p.om.7	8	0.37	0.11	0.26	3.36364	gb|AAH44524.1|	Sb:cb825 protein [Danio rerio]
CT572697.p.om.7	4	1.48	0.44	1.04	3.36364	gb|AAW27827.2|	SJCHGC09118 protein [Schistosoma japonicum]
BX872851.p.om.7	16	0.84	0.25	0.59	3.36	gb|AAH65352.1|	Mkrn2 protein [Danio rerio]
BX311502.p.om.7	68	3.09	0.92	2.18	3.3587	ref|NP_956302.1|	pancreatic progenitor cell differentiation and proliferation factor B [Danio rerio]_x0001_sp|Q6PBI2.1|PDPFB_DANRE RecName: Full=Pancreatic progenitor cell differentiation and proliferation factor B; AltName: Full=Exocrine differentiation and proliferation factor B_x0001_gb|AAH59699.1| C20orf149 homolog (H. sapiens), b [Danio rerio]
CA342237.p.om.7	8	0.47	0.14	0.33	3.35714	gb|ACI68127.1|	CMP-sialic acid transporter [Salmo salar]
CA378545.p.om.7	8	0.47	0.14	0.33	3.35714	ref|NP_001156030.1|	ADP-ribosylation factor-like protein 8A [Ovis aries]_x0001_gb|ACR55763.1| ADP-ribosylation factor-like 8A [Ovis aries]
CX025879.p.om.7	8	0.47	0.14	0.33	3.35714	gb|EU816603.1|	Salmo salar clone BAC S0142M23, complete sequence
BX298300.p.om.7	24	1.14	0.34	0.8	3.35294	ref|NP_001167324.1|	Ubiquitin-conjugating enzyme E2 Z [Salmo salar]_x0001_gb|ACN11361.1| Ubiquitin-conjugating enzyme E2 Z [Salmo salar]
BX886137.p.om.7	20	1.24	0.37	0.88	3.35135	gb|ACO08062.1|	39S ribosomal protein L21, mitochondrial precursor [Oncorhynchus mykiss]
CA383351.p.om.7	119	9.31	2.79	6.53	3.33692	gb|ACN10021.1|	40S ribosomal protein S23 [Salmo salar]_x0001_gb|ACN12368.1| 40S ribosomal protein S23 [Salmo salar]
BX085581.p.om.7	4	0.2	0.06	0.14	3.33333	gb|ACX31079.1|	elastin microfibril interfacer 2 [Mus musculus]
BX297144.p.om.7	4	0.1	0.03	0.07	3.33333	ref|NM_028293.1|	Mus musculus centrosomal protein 55 (Cep55), transcript variant 3, mRNA
BX300116.p.om.7	4	0.1	0.03	0.07	3.33333	gb|AAH57528.1|	Protein inhibitor of activated STAT, 4 [Danio rerio]
BX307765.p.om.7	4	0.2	0.06	0.14	3.33333	ref|NP_001100113.1|	probable arginyl-tRNA synthetase, mitochondrial [Rattus norvegicus]_x0001_gb|EDL98596.1| arginyl-tRNA synthetase-like (predicted) [Rattus norvegicus]_x0001_gb|AAI58745.1| Arginyl-tRNA synthetase 2, mitochondrial [Rattus norvegicus]
BX313482.p.om.7	4	0.2	0.06	0.14	3.33333	gb|EU008541.1|	Salmo salar neurogranin, TIP41-like protein (TIP41), MHC class II antigen beta chain (Sasa-DBB), MHC class II antigen alpha chain (Sasa-DBA), leucine rich repeat containing 35-like protein, and alpha-tectorin-like protein genes, complete cds
BX859156.p.om.7	4	0.2	0.06	0.14	3.33333	ref|NP_001167372.1|	Homeobox protein orthopedia B [Salmo salar]_x0001_gb|ACN11501.1| Homeobox protein orthopedia B [Salmo salar]
BX863088.p.om.7	4	0.2	0.06	0.14	3.33333	gb|AAI51860.1|	Si:dkey-239i20.2 protein [Danio rerio]
BX879337.p.om.7	8	0.5	0.15	0.35	3.33333	ref|NP_001017374.2|	eukaryotic translation initiation factor 4 gamma, 2 [Rattus norvegicus]
BX879679.p.om.7	4	0.2	0.06	0.14	3.33333	ref|XP_001373480.1|	PREDICTED: similar to GAS2-related protein [Monodelphis domestica]
BX880889.p.om.7	4	0.2	0.06	0.14	3.33333	ref|NP_001014820.1|	angiopoietin-related protein 1 [Danio rerio]_x0001_dbj|BAD86838.1| angiopoietin-like 1 [Danio rerio]_x0001_gb|AAI63080.1| Angiopoietin-like 1 [Danio rerio]_x0001_gb|AAI63101.1| Angiopoietin-like 1 [Danio rerio]
BX882584.p.om.7	4	0.2	0.06	0.14	3.33333	dbj|BAE92861.1|	tributyltin binding protein type 1 [Paralichthys olivaceus]
BX886369.p.om.7	4	0.2	0.06	0.14	3.33333	gb|ACO09962.1|	Cell division protein kinase 4 [Osmerus mordax]
BX888658.p.om.7	4	0.2	0.06	0.14	3.33333	ref|NP_001107218.1|	ATP-binding cassette sub-family A member 3 [Bos taurus]_x0001_gb|DAA15550.1| ATP-binding cassette, sub-family A (ABC1), member 3 [Bos taurus]
CA343383.p.om.7	8	0.4	0.12	0.28	3.33333	ref|NP_001016531.1|	CCR4 carbon catabolite repression 4-like [Xenopus (Silurana) tropicalis]_x0001_emb|CAJ82796.1| CCR4 carbon catabolite repression 4-like (S. cerevisiae) [Xenopus tropicalis]_x0001_gb|AAI70786.1| CCR4 carbon catabolite repression 4-like (S. cerevisiae) [Xenopus (Silurana) tropicalis]
CA343685.p.om.7	8	0.6	0.18	0.43	3.33333	dbj|BAA04801.2|	KIAA0034 [Homo sapiens]
CA344110.p.om.7	4	0.1	0.03	0.07	3.33333	gb|AAL05527.1|AF399918_1	X-box-binding protein 1B [Danio rerio]_x0001_gb|AAL69333.1|AF420256_1 x-box binding protein 1B [Danio rerio]_x0001_gb|AAH44134.1| Xbp1 protein [Danio rerio]_x0001_gb|AAI64779.1| Xbp1 protein [Danio rerio]
CB498547.p.om.7	4	0.3	0.09	0.21	3.33333	gb|ACO08618.1|	Nuclear protein Hcc-1 [Oncorhynchus mykiss]
CR369893.p.om.7	16	0.8	0.24	0.57	3.33333	ref|NP_001134941.1|	U11/U12 small nuclear ribonucleoprotein 25 kDa protein [Salmo salar]_x0001_gb|ACI69583.1| U11/U12 small nuclear ribonucleoprotein 25 kDa protein [Salmo salar]
CU073799.p.om.7	4	0.1	0.03	0.07	3.33333	ref|NP_001133366.1|	Alpha-enolase [Salmo salar]_x0001_gb|ACI33096.1| Alpha-enolase [Salmo salar]
CX027393.p.om.7	8	0.5	0.15	0.36	3.33333	gb|ACI69238.1|	Nascent polypeptide-associated complex subunit alpha [Salmo salar]
CX248778.p.om.7	12	0.7	0.21	0.49	3.33333	gb|AAI14453.1|	ZSCAN10 protein [Homo sapiens]
BX302188.p.om.7	957	43.56	13.09	30.5	3.32773	gb|ACO07655.1|	Gamma-aminobutyric acid receptor-associated protein-like 1 [Oncorhynchus mykiss]
CX720872.p.om.7	12	1.13	0.34	0.8	3.32353	gb|ACO08521.1|	Mitogen-activated protein kinase kinase 1-interacting protein 1 [Oncorhynchus mykiss]
BX883147.p.om.7	12	0.63	0.19	0.45	3.31579	gb|ACQ58097.1|	tRNA-dihydrouridine synthase 4-like PP35 [Anoplopoma fimbria]
BX859323.p.om.7	4	0.53	0.16	0.37	3.3125	gb|BT043790.1|	Salmo salar clone HM5_0626 ATP synthase, H+ transporting, mitochondrial F0 complex, subunit c-1 (atp5g1) mRNA, complete cds; nuclear gene for mitochondrial product
BX306397.p.om.7	8	0.43	0.13	0.3	3.30769	ref|NP_001158554.1|	U3 small nucleolar ribonucleoprotein protein IMP3 [Oncorhynchus mykiss]_x0001_gb|ACO08252.1| U3 small nucleolar ribonucleoprotein protein IMP3 [Oncorhynchus mykiss]
BX888359.p.om.7	8	0.43	0.13	0.3	3.30769	ref|NP_001134277.1|	Vacuolar-sorting protein SNF8 [Salmo salar]_x0001_gb|ABW77483.1| EAP30 subunit of ELL complex a [Salmo salar]_x0001_gb|ACI66898.1| Vacuolar-sorting protein SNF8 [Salmo salar]
BX299772.p.om.7	8	0.33	0.1	0.23	3.3	ref|NP_001167361.1|	Uridine 5-monophosphate synthase [Salmo salar]_x0001_gb|ACN11469.1| Uridine 5-monophosphate synthase [Salmo salar]
CA343718.p.om.7	4	0.33	0.1	0.23	3.3	gb|AAI42598.1|	Hapln1a protein [Danio rerio]
CA358612.p.om.7	8	0.33	0.1	0.23	3.3	gb|EDL89893.1|	similar to 2-aminoadipic 6-semialdehyde dehydrogenase (predicted) [Rattus norvegicus]
EE605188.p.om.7	4	0.66	0.2	0.47	3.3	dbj|BAE73113.1|	cysteine sulfinate decarboxylase [Cyprinus carpio]
GE823285.p.om.7	4	0.33	0.1	0.23	3.3	ref|NP_001154006.1|	cleavage stimulation factor subunit 3 [Oncorhynchus mykiss]_x0001_gb|ACO07515.1| Cleavage stimulation factor 77 kDa subunit [Oncorhynchus mykiss]
BX857913.p.om.7	16	0.56	0.17	0.39	3.29412	gb|ABP65284.1|	ugly duckling [Danio rerio]
BX085798.p.om.7	4	0.23	0.07	0.16	3.28571	ref|NP_001134550.1|	Signal peptidase complex catalytic subunit SEC11A [Salmo salar]_x0001_gb|ACI67969.1| Signal peptidase complex catalytic subunit SEC11A [Salmo salar]_x0001_gb|ACI69561.1| Signal peptidase complex catalytic subunit SEC11A [Salmo salar]_x0001_gb|ACO08052.1| Microsomal signal peptidase 18 kDa subunit [Oncorhynchus mykiss]_x0001_gb|ACO10290.1| Signal peptidase complex catalytic subunit SEC11A [Caligus…
BX317608.p.om.7	4	0.23	0.07	0.16	3.28571	gb|ACN60233.1|	TRAF-interacting protein [Salmo salar]
BX877042.p.om.7	8	0.46	0.14	0.32	3.28571	ref|NP_001117104.1|	antithrombin protein [Salmo salar]_x0001_emb|CAB64714.1| antithrombin [Salmo salar]
BX890124.p.om.7	4	0.23	0.07	0.16	3.28571	ref|NP_001005604.1|	B-cell CLL/lymphoma 9 protein [Danio rerio]_x0001_gb|AAQ62698.1| Bcl9 [Danio rerio]
CA345122.p.om.7	8	0.23	0.07	0.16	3.28571	gb|ACI33286.1|	4-aminobutyrate aminotransferase, mitochondrial precursor [Salmo salar]
CA352362.p.om.7	12	0.46	0.14	0.33	3.28571	ref|NP_001167165.1|	6-phosphofructokinase type C [Salmo salar]_x0001_gb|ACN10969.1| 6-phosphofructokinase type C [Salmo salar]
CA361998.p.om.7	4	0.23	0.07	0.17	3.28571	gb|ACN10394.1|	Hydroxyacid oxidase 1 [Salmo salar]_x0001_gb|ACN12757.1| Hydroxyacid oxidase 1 [Salmo salar]
CA378042.p.om.7	4	0.23	0.07	0.16	3.28571	ref|NP_001133580.1|	Kelch-like protein 13 [Salmo salar]_x0001_gb|ACI33516.1| Kelch-like protein 13 [Salmo salar]
CB497405.p.om.7	4	0.23	0.07	0.16	3.28571	gb|ACE77692.1|	liver-expressed antimicrobial peptide 2 precursor (predicted) [Sorex araneus]
CX029516.p.om.7	8	0.46	0.14	0.32	3.28571	ref|NP_001134642.1|	AP-1 complex subunit sigma-3 [Salmo salar]_x0001_gb|ACI68314.1| AP-1 complex subunit sigma-3 [Salmo salar]
DV202119.p.om.7	4	0.23	0.07	0.16	3.28571	ref|NP_001167165.1|	6-phosphofructokinase type C [Salmo salar]_x0001_gb|ACN10969.1| 6-phosphofructokinase type C [Salmo salar]
AY523664.p.om.7	27	0.98	0.3	0.67	3.26667	gb|AAS93694.1|	MHC class Ib antigen [Oncorhynchus mykiss]
BX312379.p.om.7	8	0.49	0.15	0.35	3.26667	gb|AAI54227.1|	Slc48a1b protein [Danio rerio]
BX314709.p.om.7	16	0.49	0.15	0.35	3.26667	ref|NP_001167315.1|	myelin expression factor 2 [Salmo salar]_x0001_gb|ACN11343.1| Myelin expression factor 2 [Salmo salar]
CX257785.p.om.7	8	0.49	0.15	0.35	3.26667	ref|NP_991222.1|	connector enhancer of kinase suppressor of ras 1 [Danio rerio]_x0001_gb|AAH65587.1| Connector enhancer of kinase suppressor of Ras 1 [Danio rerio]
CA384023.p.om.7	82	6.01	1.84	4.17	3.2663	gb|ACI66839.1|	NEDD8 precursor [Salmo salar]
BX305966.p.om.7	4	0.26	0.08	0.19	3.25	ref|NP_038839.2|	dynein heavy chain 8, axonemal [Mus musculus]
BX886744.p.om.7	4	0.13	0.04	0.09	3.25	ref|NP_001128424.1|	sodium- and chloride-dependent GABA transporter 3 [Macaca mulatta]
CA346766.p.om.7	4	0.13	0.04	0.09	3.25	gb|AAF21049.1|AF211158_1	phospholipase A2 inhibitor beta subunit isoform OMI-2B [Oxyuranus microlepidotus]
CA353405.p.om.7	4	0.13	0.04	0.09	3.25	ref|NP_571689.1|	pre-B-cell leukemia transcription factor 1a isoform 1 [Danio rerio]_x0001_emb|CAB76454.1| Pbx1a homeodomain protein [Danio rerio]_x0001_gb|AAH66446.1| Pre-B-cell leukemia transcription factor 1a [Danio rerio]
CA364360.p.om.7	4	0.13	0.04	0.09	3.25	gb|ACF94295.1|	phospholipase D1B [Paralichthys olivaceus]
CA371089.p.om.7	4	0.13	0.04	0.09	3.25	gb|ACA13265.1|	proliferator-activated receptor gamma coactivator 1 alpha-like protein [Carassius auratus]
CB496865.p.om.7	4	0.26	0.08	0.18	3.25	ref|NP_671477.1|	rRNA promoter binding protein [Rattus norvegicus]_x0001_gb|AAK21974.1| rRNA promoter binding protein [Rattus norvegicus]
CT564378.p.om.7	4	0.13	0.04	0.09	3.25	gb|ABB78026.1|	NADH dehydrogenase subunit 2 [Oncorhynchus mykiss]_x0001_gb|ABB78039.1| NADH dehydrogenase subunit 2 [Oncorhynchus mykiss]_x0001_gb|ABB78052.1| NADH dehydrogenase subunit 2 [Oncorhynchus mykiss]_x0001_gb|ABY54165.1| NADH dehydrogenase subunit 2 [Oncorhynchus mykiss]
CX137351.p.om.7	4	0.26	0.08	0.18	3.25	gb|AAF14365.1|AF123252_1	endo-1,4-beta-xylanase [Neocallimastix patriciarum]
BX317324.p.om.7	39	1.85	0.57	1.28	3.24561	gb|ACM09115.1|	GatC-like protein [Salmo salar]
CA341871.p.om.7	159	21.18	6.53	14.6	3.24349	gb|EAW89847.1|	ribosomal protein L39, isoform CRA_a [Homo sapiens]
BX300701.p.om.7	120	5.08	1.57	3.51	3.23567	ref|NP_001133995.1|	CREG1 protein [Salmo salar]_x0001_gb|ACI34277.1| CREG1 precursor [Salmo salar]
CA365793.p.om.7	50	1.97	0.61	1.35	3.22951	gb|ABC88478.1|	SET domian bifurcated 1 b [Danio rerio]
CA348452.p.om.7	116	6.38	1.98	4.4	3.22222	gb|ACI68054.1|	Acyl carrier protein, mitochondrial precursor [Salmo salar]_x0001_gb|ACI68514.1| Acyl carrier protein, mitochondrial precursor [Salmo salar]_x0001_gb|ACI68589.1| Acyl carrier protein, mitochondrial precursor [Salmo salar]_x0001_gb|ACM09354.1| Acyl carrier protein, mitochondrial precursor [Salmo salar]
CN211125.p.om.7	4	0.29	0.09	0.2	3.22222	gb|ACO13287.1|	Proliferating cell nuclear antigen [Esox lucius]
DV196644.p.om.7	4	0.29	0.09	0.21	3.22222	gb|AAH67619.1|	Sb:cb283 protein [Danio rerio]
GE826454.p.om.7	4	0.29	0.09	0.2	3.22222	ref|NP_001001403.1|	probable cation-transporting ATPase 13A1 [Danio rerio]_x0001_gb|AAH55391.1| ATPase type 13A [Danio rerio]
AF296372.p.om.7	43	0.87	0.27	0.61	3.22222	gb|AAG25202.1|AF287488_1	MHC class I heavy chain precursor [Oncorhynchus mykiss]_x0001_gb|AAG25204.1|AF287490_1 MHC class I heavy chain precursor [Oncorhynchus mykiss]
BX885488.p.om.7	27	1.25	0.39	0.86	3.20513	ref|NP_001164307.1|	rumba zinc finger protein [Danio rerio]_x0001_gb|ADA70039.1| rumba zinc finger protein [Danio rerio]
BX298713.p.om.7	4	0.16	0.05	0.11	3.2	ref|NP_001140145.1|	Intracellular hyaluronan-binding protein 4 [Salmo salar]_x0001_gb|ACM09637.1| Intracellular hyaluronan-binding protein 4 [Salmo salar]
BX308737.p.om.7	4	0.32	0.1	0.23	3.2	gb|ACM08366.1|	Mediator of RNA polymerase II transcription subunit 30 [Salmo salar]
BX318469.p.om.7	4	0.16	0.05	0.11	3.2	ref|NP_001133447.1|	aspartyl aminopeptidase [Salmo salar]_x0001_gb|ACI33253.1| Aspartyl aminopeptidase [Salmo salar]
BX321301.p.om.7	4	0.16	0.05	0.12	3.2	emb|CAD56863.1|	fra2 protein [Takifugu rubripes]
BX855760.p.om.7	4	0.16	0.05	0.11	3.2	gb|AAD56285.1|AF156789_1	H+/K+-ATPase alpha subunit [Pseudopleuronectes americanus]
BX886178.p.om.7	4	0.16	0.05	0.11	3.2	ref|NP_001116939.1|	deltex homolog 3 [Xenopus (Silurana) tropicalis]_x0001_gb|AAI61216.1| dtx3 protein [Xenopus (Silurana) tropicalis]
CA358805.p.om.7	4	0.16	0.05	0.11	3.2	ref|NP_958488.1|	retinol dehydrogenase 10-B [Danio rerio]_x0001_gb|AAH54596.1| Retinol dehydrogenase 10b [Danio rerio]_x0001_gb|AAI64370.1| Rdh10b protein [Danio rerio]
CA359564.p.om.7	4	0.32	0.1	0.23	3.2	gb|ABB84473.1|	interferon regulatory factor 8 [Anas platyrhynchos]
CA374085.p.om.7	4	0.16	0.05	0.11	3.2	ref|NP_001088844.1|	myeloid leukemia factor 1 [Xenopus laevis]_x0001_gb|AAH87433.1| LOC496153 protein [Xenopus laevis]
CA375205.p.om.7	23	0.32	0.1	0.22	3.2	emb|CAN84679.2|	alpha M integrin [Oncorhynchus mykiss]
CA380328.p.om.7	8	0.16	0.05	0.11	3.2	ref|NP_001133768.1|	G2/mitotic-specific cyclin-B3 [Salmo salar]_x0001_gb|ACI33866.1| G2/mitotic-specific cyclin-B3 [Salmo salar]
CR368802.p.om.7	4	0.16	0.05	0.11	3.2	ref|NP_001133583.1|	Zinc finger protein 503 [Salmo salar]_x0001_gb|ACI33520.1| Zinc finger protein 503 [Salmo salar]
CT569744.p.om.7	226	8.52	2.67	5.85	3.19101	ref|NP_001133384.1|	40S ribosomal protein S2 [Salmo salar]_x0001_gb|ACH70782.1| ribosomal protein S2 [Salmo salar]_x0001_gb|ACI33131.1| 40S ribosomal protein S2 [Salmo salar]_x0001_gb|ACI66121.1| 40S ribosomal protein S2 [Salmo salar]_x0001_gb|ACI66248.1| 40S ribosomal protein S2 [Salmo salar]_x0001_gb|ACI70182.1| 40S ribosomal protein S2 [Salmo salar]_x0001_gb|ACN09907.1| 40S ribosomal protein S2 [Salmo salar]_x000…
BX075415.p.om.7	46	2.01	0.63	1.38	3.19048	ref|NP_001120660.1|	zinc finger protein 534 [Mus musculus]_x0001_emb|CAM19624.2| novel KRAB box domain containing protein [Mus musculus]
BX085554.p.om.7	23	1.88	0.59	1.29	3.18644	gb|AAI50620.1|	DOPEY1 protein [Homo sapiens]_x0001_gb|AAI44545.1| DOPEY1 protein [Homo sapiens]
CU075055.p.om.7	15	0.54	0.17	0.36	3.17647	emb|CAM12248.2|	cyclin-dependent kinase 7 [Danio rerio]
CA343492.p.om.7	53	1.46	0.46	0.99	3.17391	gb|ACH71031.1|	voltage-dependent anion channel 2-3 [Salmo salar]_x0001_gb|ACI69626.1| Voltage-dependent anion-selective channel protein 2 [Salmo salar]
AY009126.p.om.7	4	0.19	0.06	0.14	3.16667	ref|NP_001106204.1|	ventricular myosin heavy chain [Danio rerio]
BX086684.p.om.7	8	0.19	0.06	0.14	3.16667	ref|NP_001032201.1|	autophagy-related protein 10 [Danio rerio]_x0001_gb|AAI07647.1| ATG10 autophagy related 10 homolog (S. cerevisiae) [Danio rerio]
BX297037.p.om.7	4	0.19	0.06	0.14	3.16667	gb|ACN11298.1|	Rho-related GTP-binding protein RhoE precursor [Salmo salar]
BX297135.p.om.7	4	0.19	0.06	0.14	3.16667	gb|ACO14152.1|	60S ribosomal protein L27a [Esox lucius]
BX301412.p.om.7	4	0.19	0.06	0.13	3.16667	gb|EAW94449.1|	septin 4, isoform CRA_j [Homo sapiens]
BX306086.p.om.7	4	0.19	0.06	0.13	3.16667	gb|EDM04661.1|	rCG34344 [Rattus norvegicus]
BX311578.p.om.7	4	0.19	0.06	0.14	3.16667	ref|NP_001133576.1|	Coatomer subunit delta [Salmo salar]_x0001_gb|ACI33509.1| Coatomer subunit delta [Salmo salar]
BX317879.p.om.7	4	0.19	0.06	0.13	3.16667	ref|NP_001134825.1|	Cytosolic sulfotransferase 3 [Salmo salar]_x0001_gb|ACI69056.1| Cytosolic sulfotransferase 3 [Salmo salar]
BX877993.p.om.7	4	0.19	0.06	0.13	3.16667	gb|ABY82346.1|	R-ras [Kryptolebias marmoratus]
BX883014.p.om.7	4	0.19	0.06	0.13	3.16667	ref|NP_001123491.1|	cAMP-specific 3',5'-cyclic phosphodiesterase 4B isoform 1 [Sus scrofa]_x0001_gb|ACA13180.1| phosphodiesterase 4B cAMP-specific isoform 1 [Sus scrofa]
BX909382.p.om.7	4	0.19	0.06	0.13	3.16667	ref|NP_944604.1|	BAI1-associated protein 2-like 1 [Danio rerio]_x0001_gb|AAH50238.1| BAI1-associated protein 2-like 1a [Danio rerio]
BX909643.p.om.7	4	0.19	0.06	0.13	3.16667	gb|AAH15792.2|	STK32C protein [Homo sapiens]
BX911440.p.om.7	4	0.19	0.06	0.13	3.16667	ref|NP_001154084.1|	ADP-ribosylation factor 4 [Oncorhynchus mykiss]_x0001_gb|ACO07813.1| ADP-ribosylation factor 4 [Oncorhynchus mykiss]
CB492668.p.om.7	4	0.19	0.06	0.14	3.16667	gb|ACI66581.1|	Calpain small subunit 1 [Salmo salar]
CR374382.p.om.7	4	0.19	0.06	0.13	3.16667	gb|ACO07549.1|	Ubiquinol-cytochrome c reductase iron-sulfur subunit, mitochondrial precursor [Oncorhynchus mykiss]
BX296796.p.om.7	15	0.41	0.13	0.28	3.15385	gb|ACI69832.1|	Fumarylacetoacetate hydrolase domain-containing protein 1 [Salmo salar]
BX865287.p.om.7	23	0.88	0.28	0.61	3.14286	ref|NP_001134673.1|	Exosome complex exonuclease MTR3 [Salmo salar]_x0001_gb|ACI68438.1| Exosome complex exonuclease MTR3 [Salmo salar]
BX888597.p.om.7	4	0.22	0.07	0.16	3.14286	ref|XP_002097291.1|	GE26143 [Drosophila yakuba]_x0001_gb|EDW97003.1| GE26143 [Drosophila yakuba]
CA363435.p.om.7	4	0.22	0.07	0.16	3.14286	ref|NP_001134607.1|	NADP+--arginine ADP-ribosyltransferase 1 [Salmo salar]_x0001_gb|ACI68180.1| NADP+--arginine ADP-ribosyltransferase 1 precursor [Salmo salar]
CA377676.p.om.7	8	0.22	0.07	0.15	3.14286	gb|ACI33706.1|	F-box/LRR-repeat protein 14 [Salmo salar]
CX249142.p.om.7	4	0.22	0.07	0.16	3.14286	gb|EDL80237.1|	pantothenate kinase 2 (Hallervorden-Spatz syndrome) (predicted), isoform CRA_b [Rattus norvegicus]
U48410.p.om.7	68	1.76	0.56	1.2	3.14286	ref|NP_957418.1|	arrestin, beta 2b [Danio rerio]_x0001_gb|AAH54595.1| Arrestin, beta 2b [Danio rerio]_x0001_gb|AAI64508.1| Arrb2b protein [Danio rerio]
BX312996.p.om.7	15	0.97	0.31	0.66	3.12903	ref|NP_001118109.1|	5'-AMP-activated protein kinase gamma-1 subunit [Oncorhynchus mykiss]_x0001_gb|AAU14870.1| 5'-AMP-activated protein kinase gamma-1 subunit [Oncorhynchus mykiss]
CX032448.p.om.7	19	0.97	0.31	0.66	3.12903	gb|ACM08442.1|	Phosphoserine phosphatase [Salmo salar]
AF033500.p.om.7	12	0.25	0.08	0.18	3.125	ref|NP_001117729.1|	arylalkylamine N-acetyltransferase [Oncorhynchus mykiss]_x0001_gb|AAD25333.1|AF106006_1 arylalkylamine N-acetyltransferase [Oncorhynchus mykiss]
BX863726.p.om.7	11	0.25	0.08	0.17	3.125	gb|AAZ06769.1|	Cdc25 [Anabas testudineus]
CA347013.p.om.7	4	0.25	0.08	0.18	3.125	ref|NP_001170926.1|	zinc finger protein Eos [Danio rerio]_x0001_tpe|CAQ76705.1| TPA: Eos protein [Danio rerio]
CA355752.p.om.7	4	0.25	0.08	0.18	3.125	ref|NP_001070381.1|	mesoderm induction early response protein 1 [Bos taurus]_x0001_gb|AAI23514.1| Mesoderm induction early response 1 homolog (Xenopus laevis) [Bos taurus]_x0001_gb|DAA31285.1| mesoderm induction early response 1 [Bos taurus]
GE840504.p.om.7	15	0.75	0.24	0.51	3.125	gb|ACO08815.1|	Proteasome subunit beta type 6 precursor [Oncorhynchus mykiss]
CX035300.p.om.7	19	1.12	0.36	0.77	3.11111	gb|ACI68327.1|	39S ribosomal protein L14, mitochondrial precursor [Salmo salar]_x0001_gb|ACI68360.1| 39S ribosomal protein L14, mitochondrial precursor [Salmo salar]_x0001_gb|ACN09833.1| 39S ribosomal protein L14, mitochondrial precursor [Salmo salar]_x0001_gb|ACN12180.1| 39S ribosomal protein L14, mitochondrial precursor [Salmo salar]
CU072935.p.om.7	11	0.31	0.1	0.21	3.1	ref|NP_001103882.1|	protein phosphatase 1 regulatory subunit 3D [Danio rerio]_x0001_gb|AAI54803.1| Zgc:174896 protein [Danio rerio]
BX308255.p.om.7	15	0.71	0.23	0.48	3.08696	ref|NP_001167119.1|	cleavage stimulation factor subunit 3 [Salmo salar]_x0001_gb|ACN10875.1| Cleavage stimulation factor 77 kDa subunit [Salmo salar]
CB492386.p.om.7	11	0.37	0.12	0.25	3.08333	dbj|BAG11148.1|	RRP1-like protein B [synthetic construct]
BX872798.p.om.7	97	6.98	2.27	4.71	3.07489	gb|ACM09716.1|	28S ribosomal protein S18c, mitochondrial precursor [Salmo salar]
BX302343.p.om.7	11	0.43	0.14	0.29	3.07143	gb|ACO13296.1|	39S ribosomal protein L48, mitochondrial precursor [Esox lucius]
CA359816.p.om.7	11	0.43	0.14	0.29	3.07143	gb|ACI15897.1|	apolipoprotein M [Hemibarbus mylodon]
BX305231.p.om.7	11	0.46	0.15	0.31	3.06667	ref|NP_001164797.1|	cohesin subunit SA-2 [Oryctolagus cuniculus]_x0001_gb|ACJ76606.1| stromal antigen 2 isoform a (predicted) [Oryctolagus cuniculus]
CA361953.p.om.7	15	0.46	0.15	0.31	3.06667	ref|NP_001167221.1|	Coronin-1C [Salmo salar]_x0001_gb|ACN11129.1| Coronin-1C [Salmo salar]
BX869252.p.om.7	15	1.41	0.46	0.96	3.06522	gb|ACN11290.1|	Heterogeneous nuclear ribonucleoprotein R [Salmo salar]
CU063843.p.om.7	15	0.95	0.31	0.64	3.06452	gb|ACI67490.1|	60S ribosomal protein L35 [Salmo salar]_x0001_gb|ACO13574.1| 60S ribosomal protein L35 [Esox lucius]
BX310073.p.om.7	52	2.2	0.72	1.48	3.05556	ref|NP_001134898.1|	Translation machinery-associated protein 20 [Salmo salar]_x0001_gb|ACI69372.1| Translation machinery-associated protein 20 [Salmo salar]
BX302798.p.om.7	26	1.19	0.39	0.8	3.05128	ref|NP_001038125.1|	kinetochore-associated protein DSN1 homolog [Gallus gallus]_x0001_dbj|BAE93418.1| Dsn1 protein [Gallus gallus]
BX321421.p.om.7	11	0.88	0.29	0.59	3.03448	ref|NP_001135259.1|	Lamina-associated polypeptide 2 isoform beta [Salmo salar]_x0001_gb|ACI33979.1| Lamina-associated polypeptide 2 isoform beta [Salmo salar]
BX086393.p.om.7	22	1.21	0.4	0.81	3.025	gb|ACO08611.1|	Probable ribosome biogenesis protein RLP24 [Oncorhynchus mykiss]
BX307277.p.om.7	7	0.27	0.09	0.17	3	dbj|BAE54306.1|	serine/threonine protein kinase RAF1b [Salmo salar]
BX073723.p.om.7	4	0.09	0.03	0.06	3	gb|ACN11298.1|	Rho-related GTP-binding protein RhoE precursor [Salmo salar]
BX085317.p.om.7	7	0.12	0.04	0.08	3	gb|AAI30631.1|	PHC2 protein [Homo sapiens]_x0001_gb|AAI44122.1| PHC2 protein [Homo sapiens]
BX307085.p.om.7	7	0.24	0.08	0.15	3	gb|ACI68579.1|	Serine/threonine-protein kinase VRK1 [Salmo salar]
BX309135.p.om.7	11	0.48	0.16	0.32	3	gb|AAQ02561.1|	cyclin-dependent kinase 7 [synthetic construct]
BX313803.p.om.7	4	0.12	0.04	0.09	3	ref|NP_001039846.1|	IQ calmodulin-binding motif-containing protein 1 [Bos taurus]_x0001_gb|AAI14050.1| IQ motif containing B1 [Bos taurus]_x0001_gb|DAA33437.1| IQ motif containing B1 [Bos taurus]
BX317149.p.om.7	4	0.09	0.03	0.06	3	ref|NP_001158773.1|	Adenosine kinase [Salmo salar]_x0001_gb|ACN10426.1| Adenosine kinase [Salmo salar]_x0001_gb|ACN12792.1| Adenosine kinase [Salmo salar]
BX856237.p.om.7	7	0.12	0.04	0.08	3	ref|NP_001071071.1|	activating transcription factor 7-interacting protein 1 [Danio rerio]_x0001_gb|AAI25845.1| Activating transcription factor 7 interacting protein [Danio rerio]_x0001_gb|AAI64574.1| Atf7ip protein [Danio rerio]
BX857300.p.om.7	4	0.12	0.04	0.09	3	gb|AAB05029.1|	complement component C3 [Oncorhynchus mykiss]
BX910707.p.om.7	4	0.12	0.04	0.09	3	gb|EAW98385.1|	phosphatidylinositol transfer protein, membrane-associated 2, isoform CRA_c [Homo sapiens]
CA342031.p.om.7	4	0.06	0.02	0.05	3	ref|NP_001117984.1|	T-cell activation Rho GTPase-activating protein [Oncorhynchus mykiss]_x0001_gb|AAU14872.1| T-cell activation Rho GTPase-activating protein [Oncorhynchus mykiss]
CA357414.p.om.7	11	0.33	0.11	0.22	3	gb|ACN58691.1|	Beta-1-syntrophin [Salmo salar]
CB491284.p.om.7	4	0.12	0.04	0.09	3	gb|EDL88795.1|	rCG38541 [Rattus norvegicus]
CT565473.p.om.7	4	0.12	0.04	0.09	3	ref|YP_001491233.1|	cytochrome c oxidase subunit III [Zanclus cornutus]_x0001_dbj|BAF51744.1| cytochrome c oxidase subunit III [Zanclus cornutus]
CU071439.p.om.7	4	0.12	0.04	0.09	3	ref|NP_001072406.1|	protein kinase, AMP-activated, gamma 3 non-catalytic subunit [Xenopus (Silurana) tropicalis]_x0001_gb|AAI21621.1| AMP-activated protein kinase, non-catalytic gamma-3 subunit [Xenopus (Silurana) tropicalis]
CU072127.p.om.7	4	0.12	0.04	0.08	3	ref|NP_001134320.1|	Quinone oxidoreductase [Salmo salar]_x0001_gb|ACI67047.1| Quinone oxidoreductase [Salmo salar]
CU074075.p.om.7	4	0.12	0.04	0.08	3	gb|ACM09038.1|	Ubiquitin carboxyl-terminal hydrolase isozyme L1 [Salmo salar]
BX301901.p.om.7	4	0.15	0.05	0.11	3	gb|ACI67980.1|	Nucleoside diphosphate kinase A [Salmo salar]_x0001_gb|ACN10154.1| Nucleoside diphosphate kinase A [Salmo salar]_x0001_gb|ACN12506.1| Nucleoside diphosphate kinase A [Salmo salar]
BX319946.p.om.7	7	0.15	0.05	0.1	3	ref|NP_001133124.1|	muscle specific ring finger protein 1-like [Salmo salar]_x0001_gb|ACH70731.1| muscle specific ring finger protein 1-like [Salmo salar]
BX880895.p.om.7	7	0.21	0.07	0.13	3	emb|CBI63179.1|	interleukin-1 receptor-associated kinase 4 [Coregonus maraena]
CA344343.p.om.7	11	0.6	0.2	0.4	3	ref|NP_001036210.1|	cytoplasmic dynein 1 heavy chain 1 [Danio rerio]_x0001_gb|ABC59849.1| dynein cytoplasmic 1 heavy chain 1 [Danio rerio]
CA347344.p.om.7	11	0.84	0.28	0.56	3	ref|NP_001133776.1|	Peroxisomal bifunctional enzyme [Salmo salar]_x0001_gb|ACI33880.1| Peroxisomal bifunctional enzyme [Salmo salar]
CA356655.p.om.7	4	0.15	0.05	0.11	3	gb|EAW92260.1|	Rho GTPase activating protein 11A [Homo sapiens]
CA383592.p.om.7	11	0.42	0.14	0.28	3	ref|NP_608846.2|	CG15635 [Drosophila melanogaster]_x0001_gb|AAF50995.4| CG15635 [Drosophila melanogaster]
CX254059.p.om.7	11	0.69	0.23	0.46	3	ref|NP_001080378.1|	endothelin converting enzyme 1 [Xenopus laevis]_x0001_gb|AAI08486.1| Ece1 protein [Xenopus laevis]
BX295498.p.om.7	131	8.28	2.79	5.49	2.96774	gb|ACH70657.1|	NADH dehydrogenase (ubiquinone) 1 beta subcomplex 9 [Salmo salar]
CA359571.p.om.7	11	0.71	0.24	0.47	2.95833	gb|ABY60840.1|	phosphatidylinositol phosphate 5-kinase type III isoform d [Danio rerio]
CR943439.p.om.7	2086	211.08	71.48	140	2.95299	gb|ACO07648.1|	Hemoglobin subunit beta-4 [Oncorhynchus mykiss]
CA348861.p.om.7	29	2.36	0.8	1.56	2.95	ref|NP_001086585.1|	phosphoglucomutase 2-like 1 [Xenopus laevis]_x0001_gb|AAH76840.1| Pgm2l1-prov protein [Xenopus laevis]
CX141454.p.om.7	720	65.65	22.26	43.4	2.94924	gb|ACO08020.1|	Hemoglobin subunit beta-4 [Oncorhynchus mykiss]_x0001_gb|ACO08038.1| Hemoglobin subunit beta-4 [Oncorhynchus mykiss]
CA384038.p.om.7	11	0.56	0.19	0.38	2.94737	ref|NP_032690.2|	myomesin 2 [Mus musculus]_x0001_gb|AAI15723.1| Myomesin 2 [Mus musculus]_x0001_gb|AAI15835.1| Myomesin 2 [Mus musculus]
BX073790.p.om.7	11	0.53	0.18	0.36	2.94444	gb|ACN10213.1|	Heterogeneous nuclear ribonucleoprotein A/B [Salmo salar]_x0001_gb|ACN12568.1| Heterogeneous nuclear ribonucleoprotein A/B [Salmo salar]
BX862723.p.om.7	11	0.53	0.18	0.36	2.94444	ref|NP_001167284.1|	Rab GTPase-binding effector protein 2 [Salmo salar]_x0001_gb|ACN11276.1| Rab GTPase-binding effector protein 2 [Salmo salar]
BX318413.p.om.7	11	0.5	0.17	0.33	2.94118	gb|AAH44541.1|	DEAD/H (Asp-Glu-Ala-Asp/His) box polypeptide 19 (DBP5 homolog, yeast) [Danio rerio]
BX890177.p.om.7	11	0.5	0.17	0.33	2.94118	gb|ACI33702.1|	WD repeat-containing protein 3 [Salmo salar]
CX724639.p.om.7	7	0.41	0.14	0.26	2.92857	ref|NP_001167383.1|	histone-lysine N-methyltransferase PRDM9 [Salmo salar]_x0001_gb|ACN10800.1| PR domain zinc finger protein 9 [Salmo salar]
AB175674.p.om.7	11	0.38	0.13	0.26	2.92308	dbj|BAD72827.1|	transcription factor Glial cells missing-2 [Oncorhynchus mykiss]
CX037096.p.om.7	7	0.35	0.12	0.22	2.91667	ref|NP_001133324.1|	interferon regulatory factor 5 [Salmo salar]_x0001_gb|ACI33029.1| Interferon regulatory factor 5 [Salmo salar]
BX075392.p.om.7	68	3.09	1.06	2.03	2.91509	ref|NP_001139889.1|	FRG1 protein [Salmo salar]_x0001_gb|ACM08514.1| FRG1 [Salmo salar]
BX076866.p.om.7	36	1.31	0.45	0.87	2.91111	gb|ACO09624.1|	Geminin [Osmerus mordax]
BX867556.p.om.7	7	0.32	0.11	0.21	2.90909	ref|NM_001108033.1|	Rattus norvegicus small nuclear RNA activating complex, polypeptide 1 (Snapc1), mRNA
BX856593.p.om.7	25	0.9	0.31	0.59	2.90323	gb|AAI43346.1|	Polymerase (RNA) I polypeptide A, 194kDa [Homo sapiens]
CX067541.p.om.7	18	1.19	0.41	0.78	2.90244	ref|NP_001117660.1|	embryonic beta-type globin2 [Oncorhynchus mykiss]_x0001_dbj|BAA34951.1| embryonic beta-type globin2 [Oncorhynchus mykiss]
CU071986.p.om.7	215	5.63	1.94	3.7	2.90206	gb|ACI69801.1|	Ubiquitin fusion degradation protein 1 homolog [Salmo salar]_x0001_gb|ACO08767.1| Ubiquitin fusion degradation protein 1 homolog [Oncorhynchus mykiss]
CT563289.p.om.7	1984	767.05	264.48	503	2.90022	gb|BT060013.1|	Salmo salar clone ssal-rgg-516-172 60S ribosomal protein L27 putative mRNA, complete cds
BX312462.p.om.7	14	0.58	0.2	0.37	2.9	ref|NP_001164780.1|	zinc finger and SCAN domain-containing protein 29 [Oryctolagus cuniculus]_x0001_gb|ACJ74026.1| zinc finger protein 690 (predicted) [Oryctolagus cuniculus]
BX857076.p.om.7	7	0.29	0.1	0.19	2.9	gb|ACN10534.1|	Phospholipid scramblase 1 [Salmo salar]
CA360358.p.om.7	14	0.52	0.18	0.33	2.88889	ref|NP_001156380.1|	sestrin-1 isoform 1 [Mus musculus]
CB487729.p.om.7	18	0.52	0.18	0.34	2.88889	gb|ACN10977.1|	Epididymis-specific alpha-mannosidase precursor [Salmo salar]
BX320027.p.om.7	32	1.56	0.54	1.02	2.88889	ref|NP_001117176.1|	small nuclear ribonucleoprotein polypeptide A' [Salmo salar]_x0001_emb|CAA06160.1| U2 snRNP-specific A' protein [Salmo salar]_x0001_gb|ACM08787.1| U2 small nuclear ribonucleoprotein A [Salmo salar]
BX887763.p.om.7	7	0.49	0.17	0.31	2.88235	gb|ACH85346.1|	WD repeat domain 4-like [Salmo salar]
CR370274.p.om.7	89	5.59	1.94	3.65	2.88144	gb|ACO15454.1|	40S ribosomal protein S11 [Caligus clemensi]
BX297961.p.om.7	25	1.21	0.42	0.79	2.88095	emb|CAG12531.1|	unnamed protein product [Tetraodon nigroviridis]
CU070512.p.om.7	32	1.55	0.54	1.01	2.87037	gb|EAW57262.1|	zinc finger protein 227, isoform CRA_b [Homo sapiens]
CX027203.p.om.7	7	0.66	0.23	0.42	2.86957	ref|NP_958862.1|	ras-related protein Rab-2A [Danio rerio]_x0001_gb|AAH44459.1| RAB2A, member RAS oncogene family [Danio rerio]_x0001_emb|CAQ14700.1| RAB2, member RAS oncogene family [Danio rerio]_x0001_gb|AAI65141.1| Rab2a protein [Danio rerio]
CA377186.p.om.7	7	0.43	0.15	0.28	2.86667	ref|NP_058876.2|	pleckstrin homology-like domain family A member 1 [Rattus norvegicus]_x0001_gb|EDM16726.1| pleckstrin homology-like domain, family A, member 1, isoform CRA_a [Rattus norvegicus]
CX254832.p.om.7	7	0.63	0.22	0.41	2.86364	ref|NP_001117856.1|	coagulation factor II [Oncorhynchus mykiss]_x0001_emb|CAD59688.1| prothrombin [Oncorhynchus mykiss]
BX080532.p.om.7	7	0.2	0.07	0.13	2.85714	gb|AAH34513.1|	Polo-like kinase 2 (Drosophila) [Mus musculus]
CA345703.p.om.7	7	0.4	0.14	0.26	2.85714	ref|NP_001135291.1|	nuclear factor interleukin-3-regulated protein [Salmo salar]_x0001_gb|ACI34322.1| Nuclear factor interleukin-3-regulated protein [Salmo salar]
CX006281.p.om.7	99	5.16	1.81	3.36	2.85083	gb|ACO13378.1|	Transcription initiation factor IIA subunit 2 [Esox lucius]
CX261563.p.om.7	7	0.37	0.13	0.24	2.84615	gb|ACI33706.1|	F-box/LRR-repeat protein 14 [Salmo salar]
CA353788.p.om.7	14	1.59	0.56	1.02	2.83929	gb|ACO13985.1|	Ubiquitin-conjugating enzyme E2 E2 [Esox lucius]
BX305485.p.om.7	7	0.34	0.12	0.22	2.83333	gb|EAW60185.1|	TRIO and F-actin binding protein, isoform CRA_e [Homo sapiens]
CA351240.p.om.7	7	0.34	0.12	0.22	2.83333	ref|NP_001100248.1|	anoctamin-4 [Rattus norvegicus]_x0001_gb|EDM16991.1| transmembrane protein 16D (predicted) [Rattus norvegicus]
CR368620.p.om.7	7	0.51	0.18	0.33	2.83333	ref|NM_174849.3|	Mus musculus ATP/GTP binding protein-like 5 (Agbl5), transcript variant 5, mRNA
CR374911.p.om.7	7	0.34	0.12	0.22	2.83333	gb|ACI66623.1|	28S ribosomal protein S7, mitochondrial precursor [Salmo salar]
CB487290.p.om.7	28	1.44	0.51	0.93	2.82353	ref|NP_001133577.1|	F-actin-capping protein subunit alpha-1 [Salmo salar]_x0001_gb|ACI33510.1| F-actin-capping protein subunit alpha-1 [Salmo salar]
CR944104.p.om.7	228	8.72	3.09	5.63	2.82201	ref|NP_001136189.1|	Gamma-aminobutyric acid receptor-associated protein [Salmo salar]_x0001_ref|NP_001158563.1| Gamma-aminobutyric acid receptor-associated protein [Oncorhynchus mykiss]_x0001_gb|ACI66281.1| Gamma-aminobutyric acid receptor-associated protein [Salmo salar]_x0001_gb|ACI66486.1| Gamma-aminobutyric acid receptor-associated protein [Salmo salar]_x0001_gb|ACO07947.1| Gamma-aminobutyric acid receptor-assoc…
CN211053.p.om.7	63	4.88	1.73	3.15	2.82081	gb|ACI67528.1|	NADH dehydrogenase 1 alpha subcomplex subunit 5 [Salmo salar]_x0001_gb|ACI68326.1| NADH dehydrogenase 1 alpha subcomplex subunit 5 [Salmo salar]_x0001_gb|ACI68847.1| NADH dehydrogenase 1 alpha subcomplex subunit 5 [Salmo salar]_x0001_gb|ACM09783.1| NADH dehydrogenase 1 alpha subcomplex subunit 5 [Salmo salar]
BX083460.p.om.7	7	0.31	0.11	0.2	2.81818	emb|CAR82267.1|	D-type LMW glutenin subunit [Triticum aestivum]
BX299236.p.om.7	7	0.31	0.11	0.2	2.81818	ref|NP_001134273.1|	Tumor suppressor candidate 2 [Salmo salar]_x0001_gb|ACI66875.1| Tumor suppressor candidate 2 [Salmo salar]
CA346301.p.om.7	7	0.31	0.11	0.2	2.81818	ref|NP_001017358.1|	R-spondin-3 precursor [Danio rerio]_x0001_dbj|BAD74061.1| cabriolet [Danio rerio]
CA352628.p.om.7	14	1.38	0.49	0.89	2.81633	gb|BT043893.1|	Salmo salar clone HM4_1791 ribosomal protein S3-1 mRNA, complete cds
CA354002.p.om.7	14	0.45	0.16	0.29	2.8125	ref|NP_001077297.2|	protein AATF [Danio rerio]
BX310592.p.om.7	35	1.49	0.53	0.96	2.81132	ref|NP_001154019.1|	Inosine triphosphate pyrophosphatase [Oncorhynchus mykiss]_x0001_gb|ACO07556.1| Inosine triphosphate pyrophosphatase [Oncorhynchus mykiss]
CA345148.p.om.7	199	7.49	2.67	4.82	2.80524	gb|ACI68002.1|	Cytochrome b-c1 complex subunit Rieske, mitochondrial precursor [Salmo salar]
BX085748.p.om.7	7	0.28	0.1	0.18	2.8	emb|CAF93474.1|	unnamed protein product [Tetraodon nigroviridis]
BX086749.p.om.7	21	0.98	0.35	0.63	2.8	gb|ACI69237.1|	Pre-mRNA-splicing factor syf2 [Salmo salar]
BX300519.p.om.7	7	0.28	0.1	0.18	2.8	ref|NP_001133487.1|	Zinc finger protein 576 [Salmo salar]_x0001_gb|ACI33333.1| Zinc finger protein 576 [Salmo salar]
CA380325.p.om.7	52	1.12	0.4	0.72	2.8	gb|ACN60351.1|	Negative elongation factor A [Salmo salar]
BX869025.p.om.7	7	0.7	0.25	0.45	2.8	ref|NP_001158867.1|	legumain [Salmo salar]_x0001_gb|ACN10644.1| Legumain precursor [Salmo salar]
BX304876.p.om.7	21	0.95	0.34	0.61	2.79412	ref|NP_001158745.1|	kinase-like protein SgK196 [Salmo salar]_x0001_gb|ACN10125.1| kinase-like protein SgK196 [Salmo salar]_x0001_gb|ACN12476.1| kinase-like protein SgK196 [Salmo salar]
CR374512.p.om.7	28	1.34	0.48	0.87	2.79167	gb|EAW51016.1|	brain-specific protein p25 alpha, isoform CRA_c [Homo sapiens]
CX149342.p.om.7	7	0.39	0.14	0.25	2.78571	gb|ACY30364.1|	von Willebrand factor A domain containing 5A [Salmo salar]
BX912597.p.om.7	7	0.25	0.09	0.16	2.77778	gb|ACO13480.1|	Exosome complex exonuclease RRP41 [Esox lucius]
CA344634.p.om.7	17	0.36	0.13	0.23	2.76923	gb|ACN60321.1|	Myosin-IXb [Salmo salar]
CA386757.p.om.7	7	0.36	0.13	0.23	2.76923	ref|NM_001130065.1|	Homo sapiens myosin IXB (MYO9B), transcript variant 2, mRNA
CU071388.p.om.7	14	0.36	0.13	0.23	2.76923	ref|NP_001134000.1|	Dermal papilla-derived protein 6 homolog [Salmo salar]_x0001_gb|ACI34290.1| Dermal papilla-derived protein 6 homolog [Salmo salar]_x0001_gb|ACN11235.1| Dermal papilla-derived protein 6 homolog [Salmo salar]
BX911320.p.om.7	59	2.63	0.95	1.69	2.76842	ref|NP_001133106.1|	cyclin-H [Salmo salar]_x0001_gb|ACH70698.1| cyclin H [Salmo salar]_x0001_gb|ACM09787.1| Cyclin-H [Salmo salar]
GE822914.p.om.7	31	1.99	0.72	1.27	2.76389	gb|ACO08706.1|	p53 and DNA damage-regulated protein 1 [Oncorhynchus mykiss]
BX077148.p.om.7	38	1.63	0.59	1.04	2.76271	ref|NP_001133174.1|	triosephosphate isomerase B [Salmo salar]_x0001_gb|ACH70887.1| triosephosphate isomerase 1b [Salmo salar]_x0001_gb|ACM09737.1| Triosephosphate isomerase [Salmo salar]_x0001_gb|ACM09835.1| Triosephosphate isomerase [Salmo salar]
GE823968.p.om.7	100	5.11	1.85	3.26	2.76216	gb|ACO08400.1|	NADH dehydrogenase flavoprotein 2, mitochondrial precursor [Oncorhynchus mykiss]
CA375311.p.om.7	24	0.8	0.29	0.51	2.75862	ref|NP_001140147.1|	CDP-diacylglycerol--serine O-phosphatidyltransferase [Salmo salar]_x0001_gb|ACM09799.1| CDP-diacylglycerol--serine O-phosphatidyltransferase [Salmo salar]
CR362433.p.om.7	38	1.68	0.61	1.07	2.7541	gb|ACI68626.1|	F-box/WD repeat-containing protein 4 [Salmo salar]
BX313068.p.om.7	14	0.66	0.24	0.43	2.75	gb|EAW88075.1|	chromosome 9 open reading frame 96, isoform CRA_a [Homo sapiens]
BX307916.p.om.7	7	0.44	0.16	0.28	2.75	ref|NP_663592.3|	hect domain and RCC1-like domain 1 [Mus musculus]
BX910849.p.om.7	48	1.87	0.68	1.19	2.75	gb|ACN11434.1|	Acidic leucine-rich nuclear phosphoprotein 32 family member B [Salmo salar]
CX136150.p.om.7	7	0.44	0.16	0.28	2.75	gb|ACN58628.1|	Tubulin alpha-1C chain [Salmo salar]
U95296.p.om.7	7	0.22	0.08	0.14	2.75	ref|NP_001117050.1|	muscle fatty acid binding protein [Salmo salar]_x0001_gb|AAR91708.1| muscle fatty acid binding protein [Salmo salar]
CB486168.p.om.7	17	0.63	0.23	0.39	2.73913	gb|AAI55472.1|	tp53rk protein [Xenopus (Silurana) tropicalis]
BX317897.p.om.7	113	4.93	1.8	3.12	2.73889	gb|ACN09976.1|	ATP synthase subunit g, mitochondrial [Salmo salar]_x0001_gb|ACN12323.1| ATP synthase subunit g, mitochondrial [Salmo salar]_x0001_gb|ACO08073.1| ATP synthase subunit g, mitochondrial [Oncorhynchus mykiss]
AF483532.p.om.7	14	0.41	0.15	0.26	2.73333	ref|NP_001117807.1|	VHSV-induced protein-6 [Oncorhynchus mykiss]_x0001_gb|AAM18471.1|AF483532_1 VHSV-induced protein-6 [Oncorhynchus mykiss]
BX909994.p.om.7	7	0.41	0.15	0.27	2.73333	gb|AAW31810.1|	Esrom [Danio rerio]
BX076091.p.om.7	7	0.3	0.11	0.2	2.72727	gb|ACO14015.1|	UMP-CMP kinase [Esox lucius]
BX310342.p.om.7	7	0.3	0.11	0.19	2.72727	gb|ACN11358.1|	Elongation factor 2 [Salmo salar]
BX886925.p.om.7	7	0.3	0.11	0.19	2.72727	gb|ACH70735.1|	ATPase H+ transporting V1 subunit D [Salmo salar]_x0001_gb|ACI68340.1| Vacuolar proton pump subunit D [Salmo salar]_x0001_gb|ACM09121.1| Vacuolar proton pump subunit D [Salmo salar]
CA343861.p.om.7	7	0.3	0.11	0.2	2.72727	gb|ACO09244.1|	Ras-related protein Rab-4A [Osmerus mordax]
DQ092328.p.om.7	7	0.3	0.11	0.19	2.72727	gb|AAZ66045.1|	secreted tapasin-related [Oncorhynchus mykiss]
CR373218.p.om.7	41	1.96	0.72	1.24	2.72222	gb|ACM09267.1|	28S ribosomal protein S12, mitochondrial precursor [Salmo salar]
CA346050.p.om.7	27	0.68	0.25	0.43	2.72	ref|NP_001007292.1|	3-oxoacid CoA transferase 1a [Danio rerio]_x0001_gb|AAH78408.1| 3-oxoacid CoA transferase 1a [Danio rerio]_x0001_emb|CAP19426.1| 3-oxoacid CoA transferase 1 [Danio rerio]_x0001_emb|CAQ14272.1| 3-oxoacid CoA transferase 1 [Danio rerio]_x0001_emb|CAQ13456.1| 3-oxoacid CoA transferase 1 [Danio rerio]_x0001_gb|AAI63972.1| 3-oxoacid CoA transferase 1a [Danio rerio]
BX867612.p.om.7	7	0.38	0.14	0.25	2.71429	ref|XP_001338503.2|	PREDICTED: MLX interacting protein [Danio rerio]
CA347694.p.om.7	7	0.38	0.14	0.25	2.71429	gb|ACM08442.1|	Phosphoserine phosphatase [Salmo salar]
CA357172.p.om.7	7	0.38	0.14	0.24	2.71429	ref|NP_001092079.1|	protocadherin-8 [Gallus gallus]_x0001_gb|ABO93196.1| paraxial protocadherin [Gallus gallus]
CU064801.p.om.7	7	0.19	0.07	0.12	2.71429	ref|NP_001027796.1|	SMC2 protein [Takifugu rubripes]_x0001_emb|CAD58848.2| SMC2 protein [Takifugu rubripes]
CB491582.p.om.7	34	1.98	0.73	1.25	2.71233	ref|NP_001102374.1|	zinc finger protein 787 [Rattus norvegicus]_x0001_gb|EDL83173.1| similar to TTF-I interacting peptide 20; TIP20; Transcription Termination Factor I Interacting Peptide 20 (predicted) [Rattus norvegicus]
BX308105.p.om.7	10	0.27	0.1	0.17	2.7	ref|NP_957180.1|	glutaryl-Coenzyme A dehydrogenase [Danio rerio]_x0001_gb|AAH63972.1| Glutaryl-Coenzyme A dehydrogenase [Danio rerio]
CA366712.p.om.7	7	0.35	0.13	0.23	2.69231	gb|EAW51537.1|	formin-like 1, isoform CRA_d [Homo sapiens]
CA344367.p.om.7	349	9.23	3.43	5.8	2.69096	ref|NP_001133198.1|	malate dehydrogenase 2-2, NAD (mitochondrial) [Salmo salar]_x0001_gb|ACH70949.1| malate dehydrogenase 2-2, NAD (mitochondrial) [Salmo salar]_x0001_gb|ACI68017.1| Malate dehydrogenase, mitochondrial precursor [Salmo salar]
CR376601.p.om.7	17	0.78	0.29	0.49	2.68966	ref|NP_001133254.1|	Acyl-protein thioesterase 2 [Salmo salar]_x0001_gb|ACI32909.1| Acyl-protein thioesterase 2 [Salmo salar]_x0001_gb|ACM09734.1| Acyl-protein thioesterase 2 [Salmo salar]
BX860371.p.om.7	17	0.83	0.31	0.52	2.67742	gb|BC120008.1|	Bos taurus cDNA clone IMAGE:8271940
CX723375.p.om.7	64	6.23	2.33	3.89	2.67382	gb|ACI67868.1|	60S ribosomal protein L13a [Salmo salar]_x0001_gb|ACN10186.1| 60S ribosomal protein L13a [Salmo salar]_x0001_gb|ACN12540.1| 60S ribosomal protein L13a [Salmo salar]
CB490685.p.om.7	81	9.59	3.59	6.01	2.67131	ref|NP_001133106.1|	cyclin-H [Salmo salar]_x0001_gb|ACH70698.1| cyclin H [Salmo salar]_x0001_gb|ACM09787.1| Cyclin-H [Salmo salar]
BX075508.p.om.7	3	0.08	0.03	0.04	2.66667	ref|XP_001919098.1|	PREDICTED: si:dkeyp-104h9.6 [Danio rerio]
BX083486.p.om.7	10	0.4	0.15	0.25	2.66667	ref|NP_001004586.1|	histidyl-tRNA synthetase, cytoplasmic [Danio rerio]_x0001_gb|AAH81624.1| Histidyl-tRNA synthetase [Danio rerio]
BX302008.p.om.7	7	0.32	0.12	0.21	2.66667	ref|NP_001167216.1|	exostosin-like 2 [Salmo salar]_x0001_gb|ACN11111.1| Exostosin-like 2 [Salmo salar]
BX304538.p.om.7	3	0.08	0.03	0.04	2.66667	ref|NP_001071022.1|	tyrosine aminotransferase [Danio rerio]_x0001_gb|AAI25948.1| Tyrosine aminotransferase [Danio rerio]_x0001_gb|AAI65579.1| Tat protein [Danio rerio]
BX317853.p.om.7	3	0.08	0.03	0.04	2.66667	ref|NP_001131132.1|	protein Wnt-9b [Danio rerio]_x0001_gb|ACI95255.1| Wnt9b [Danio rerio]
BX880903.p.om.7	10	0.32	0.12	0.2	2.66667	gb|ACM42422.1|	malonyl-CoA decarboxylase [Sus scrofa]
BX908876.p.om.7	10	0.4	0.15	0.25	2.66667	gb|ACQ58386.1|	Cytochrome b-c1 complex subunit 9 [Anoplopoma fimbria]
CA343921.p.om.7	7	0.16	0.06	0.1	2.66667	gb|ACM09410.1|	15-hydroxyprostaglandin dehydrogenase [Salmo salar]
CA347681.p.om.7	3	0.08	0.03	0.04	2.66667	ref|NP_001156015.1|	COUP transcription factor 2 [Ovis aries]_x0001_gb|AAI34736.1| NR2F2 protein [Bos taurus]_x0001_gb|ACR55775.1| nuclear receptor subfamily 2 group F member 2 [Ovis aries]
CB492996.p.om.7	7	0.16	0.06	0.1	2.66667	ref|NP_001140154.1|	solute carrier family 15 member 1 [Salmo salar]_x0001_dbj|BAH24102.1| solute carrier family 15 member 1 [Salmo salar]
CR371501.p.om.7	10	0.24	0.09	0.15	2.66667	ref|NP_990276.1|	smooth muscle protein phosphatase type 1-binding subunit [Gallus gallus]_x0001_gb|AAC60216.1| smooth muscle protein phosphatase type 1-binding subunit [Gallus gallus]
BX866998.p.om.7	64	3.3	1.24	2.06	2.66129	gb|ACI70015.1|	Proteasome subunit alpha type-6 [Salmo salar]
BX298597.p.om.7	17	0.77	0.29	0.49	2.65517	ref|NP_001133762.1|	Gamma-enolase [Salmo salar]_x0001_gb|ACI33856.1| Gamma-enolase [Salmo salar]
CR943174.p.om.7	10	0.77	0.29	0.48	2.65517	gb|ACO09329.1|	Glutaredoxin-1 [Osmerus mordax]
CA346591.p.om.7	17	0.69	0.26	0.44	2.65385	pdb|1A0J|A	Chain A, Crystal Structure Of A Non-Psychrophilic Trypsin From A Cold-Adapted Fish Species._x0001_pdb|1A0J|B Chain B, Crystal Structure Of A Non-Psychrophilic Trypsin From A Cold-Adapted Fish Species._x0001_pdb|1A0J|C Chain C, Crystal Structure Of A Non-Psychrophilic Trypsin From A Cold-Adapted Fish Species._x0001_pdb|1A0J|D Chain D, Crystal Structure Of A Non-Psychrophilic Trypsin From A Cold-Ad…
BX307448.p.om.7	47	2.28	0.86	1.42	2.65116	gb|ACN09855.1|	Acyl carrier protein, mitochondrial precursor [Salmo salar]_x0001_gb|ACN12202.1| Acyl carrier protein, mitochondrial precursor [Salmo salar]
BX871509.p.om.7	57	2.65	1	1.65	2.65	ref|NP_001157798.1|	bromodomain-containing protein 8 isoform 4 [Homo sapiens]
CX030350.p.om.7	10	0.53	0.2	0.33	2.65	ref|NP_001134394.1|	mediator of RNA polymerase II transcription subunit 11 [Salmo salar]_x0001_gb|ACI67341.1| Mediator of RNA polymerase II transcription subunit 11 [Salmo salar]_x0001_gb|ACN09839.1| Mediator of RNA polymerase II transcription subunit 11 [Salmo salar]_x0001_gb|ACN12186.1| Mediator of RNA polymerase II transcription subunit 11 [Salmo salar]
BX320494.p.om.7	10	0.45	0.17	0.28	2.64706	gb|ACO35043.1|	ubiquitin-conjugating enzyme E2 D4 [Larimichthys crocea]
BX880060.p.om.7	10	0.37	0.14	0.23	2.64286	ref|NP_001133313.1|	F-box only protein 4 [Salmo salar]_x0001_gb|ACI33013.1| F-box only protein 4 [Salmo salar]
CA379805.p.om.7	20	0.74	0.28	0.46	2.64286	ref|NP_956802.2|	116 kDa U5 small nuclear ribonucleoprotein component [Danio rerio]_x0001_gb|AAI54434.1| Eftud2 protein [Danio rerio]
CB491540.p.om.7	30	1.61	0.61	1	2.63934	gb|EDL89115.1|	rCG29479, isoform CRA_a [Rattus norvegicus]
CA347514.p.om.7	20	1.53	0.58	0.95	2.63793	gb|ACO08528.1|	Retinoic acid receptor responder protein 3 [Oncorhynchus mykiss]
BX086567.p.om.7	20	0.58	0.22	0.36	2.63636	ref|NM_001145564.1|	Danio rerio cytochrome P450, family 2, subfamily U, polypeptide 1 (cyp2u1), mRNA
CA349156.p.om.7	7	0.29	0.11	0.19	2.63636	gb|EF467298.1|	Salmo salar clone 39N03 TCR-alpha/delta locus, genomic sequence
CU071357.p.om.7	10	0.29	0.11	0.18	2.63636	ref|NM_001034867.2|	Mus musculus peptidase M20 domain containing 2 (Pm20d2), mRNA
DV190771.p.om.7	10	0.58	0.22	0.36	2.63636	ref|NP_001117908.1|	serum amyloid A [Oncorhynchus mykiss]_x0001_emb|CAM12347.1| serum amyloid A [Oncorhynchus mykiss]_x0001_emb|CAM12348.1| serum amyloid A [Oncorhynchus mykiss]
DV200297.p.om.7	10	0.58	0.22	0.36	2.63636	ref|NP_001133181.1|	aldolase a, fructose-bisphosphate 1 [Salmo salar]_x0001_gb|ACH70901.1| aldolase a, fructose-bisphosphate 1 [Salmo salar]_x0001_gb|ACH70904.1| aldolase a, fructose-bisphosphate 1 [Salmo salar]
CB488955.p.om.7	20	1.66	0.63	1.03	2.63492	gb|ACO08809.1|	ATP synthase f chain, mitochondrial [Oncorhynchus mykiss]
CX035975.p.om.7	10	1.08	0.41	0.67	2.63415	ref|NP_001136306.1|	remodeling and spacing factor 1 [Sus scrofa]_x0001_gb|ACJ53937.1| remodeling and spacing factor 1 [Sus scrofa]
BX072768.p.om.7	7	0.21	0.08	0.14	2.625	ref|NP_001119851.1|	long-chain-fatty-acid--CoA ligase ACSBG2 [Danio rerio]
BX310715.p.om.7	10	0.42	0.16	0.26	2.625	gb|AAH08089.1|	Rnps1 protein [Mus musculus]
BX865039.p.om.7	7	0.21	0.08	0.14	2.625	gb|AAH95643.1|	LOC553451 protein [Danio rerio]
CA348771.p.om.7	10	0.63	0.24	0.39	2.625	dbj|AK294855.1|	Homo sapiens cDNA FLJ50509 complete cds, highly similar to Disks large homolog 1
CX144947.p.om.7	50	3.15	1.2	1.95	2.625	gb|ACI68908.1|	26S protease regulatory subunit 4 [Salmo salar]
CX254485.p.om.7	20	0.84	0.32	0.52	2.625	emb|CAP19082.1|	BRCA1/BRCA2-containing complex, subunit 3 [Mus musculus]
BX858968.p.om.7	40	1.86	0.71	1.15	2.61972	gb|AAH61959.1|	Asxl1 protein [Danio rerio]
CR364125.p.om.7	10	0.55	0.21	0.34	2.61905	gb|ACI68984.1|	Myosin light polypeptide 6 [Salmo salar]_x0001_gb|ACM08575.1| Myosin light polypeptide 6 [Salmo salar]_x0001_gb|ACM08984.1| Myosin light polypeptide 6 [Salmo salar]_x0001_gb|ACM09680.1| Myosin light polypeptide 6 [Salmo salar]_x0001_gb|ACO14465.1| Myosin light polypeptide 6 [Esox lucius]
BX082263.p.om.7	10	0.47	0.18	0.29	2.61111	ref|NP_001135304.1|	cell cycle checkpoint protein RAD1 [Salmo salar]_x0001_gb|ACI66420.1| Cell cycle checkpoint protein RAD1 [Salmo salar]
BX319445.p.om.7	10	0.47	0.18	0.29	2.61111	ref|NP_001073549.1|	periphilin-1 [Danio rerio]_x0001_gb|AAI28825.1| Periphilin 1 [Danio rerio]
BX869013.p.om.7	10	0.47	0.18	0.29	2.61111	gb|ACI66895.1|	Cathepsin H precursor [Salmo salar]
CU069802.p.om.7	10	0.47	0.18	0.29	2.61111	gb|EAX06127.1|	B-cell scaffold protein with ankyrin repeats 1, isoform CRA_a [Homo sapiens]
BX298820.p.om.7	50	2.27	0.87	1.41	2.6092	gb|ACM08236.1|	Survival motor neuron protein 1 [Salmo salar]
CU071990.p.om.7	33	0.86	0.33	0.53	2.60606	gb|ACO09314.1|	Delta3,5-delta2,4-dienoyl-CoA isomerase, mitochondrial precursor [Osmerus mordax]
CA342396.p.om.7	10	0.52	0.2	0.32	2.6	ref|NP_001099090.1|	ankyrin 3, node of Ranvier (ankyrin G) [Bos taurus]_x0001_gb|AAI53298.1| ANK3 protein [Bos taurus]_x0001_gb|DAA14317.1| ankyrin 3, node of Ranvier (ankyrin G) [Bos taurus]
CA362869.p.om.7	7	0.13	0.05	0.08	2.6	gb|ABI30220.1|	desmoglein 1 [Sus scrofa]
BX310659.p.om.7	13	0.57	0.22	0.34	2.59091	ref|NP_001133771.1|	GTP-binding protein Rit1 [Salmo salar]_x0001_gb|ACI33874.1| GTP-binding protein Rit1 [Salmo salar]_x0001_gb|ACN11118.1| GTP-binding protein Rit1 [Salmo salar]
CA358437.p.om.7	10	0.57	0.22	0.35	2.59091	ref|NP_001159802.1|	prostaglandin E receptor 1, subtype EP1b [Danio rerio]_x0001_gb|ACX47464.1| prostaglandin E receptor 1 subtype EP1b precursor-like protein [Danio rerio]
CU068803.p.om.7	13	0.57	0.22	0.34	2.59091	ref|NP_001020585.1|	histidyl-tRNA synthetase, cytoplasmic [Rattus norvegicus]_x0001_gb|AAH97969.1| Histidyl-tRNA synthetase [Rattus norvegicus]_x0001_gb|EDL76319.1| dead end homolog 1 (zebrafish) [Rattus norvegicus]
BX880439.p.om.7	10	0.44	0.17	0.27	2.58824	gb|ADC80541.1|	carnitine palmitoyl transferase 1 isoform 1 [Oreochromis niloticus x Oreochromis mossambicus x Oreochromis hornorum]
CA364094.p.om.7	33	1.68	0.65	1.03	2.58462	gb|ACN10778.1|	Mothers against decapentaplegic homolog 4 [Salmo salar]
CU069428.p.om.7	13	0.62	0.24	0.37	2.58333	emb|CAG28935.1|	preproallatostatin B [Gryllus bimaculatus]
BX080463.p.om.7	10	0.49	0.19	0.3	2.57895	ref|NP_001133934.1|	Methylosome protein 50 [Salmo salar]_x0001_gb|ACI34166.1| Methylosome protein 50 [Salmo salar]
BX306684.p.om.7	10	0.49	0.19	0.31	2.57895	ref|NP_001139986.1|	SUMO-activating enzyme subunit 1 [Salmo salar]_x0001_gb|ACM09034.1| SUMO-activating enzyme subunit 1 [Salmo salar]
BX909322.p.om.7	13	0.49	0.19	0.3	2.57895	pdb|2QJF|A	Chain A, Crystal Structure Of Atp-Sulfurylase Domain Of Human Paps Synthetase 1_x0001_pdb|2QJF|B Chain B, Crystal Structure Of Atp-Sulfurylase Domain Of Human Paps Synthetase 1
CA388241.p.om.7	46	1.93	0.75	1.18	2.57333	gb|ACQ58707.1|	40S ribosomal protein S9 [Anoplopoma fimbria]
BX075387.p.om.7	13	0.54	0.21	0.33	2.57143	gb|ACO08243.1|	Succinate dehydrogenase iron-sulfur protein, mitochondrial precursor [Oncorhynchus mykiss]
CA368668.p.om.7	13	0.54	0.21	0.32	2.57143	ref|NP_666096.3|	prolyl endopeptidase-like isoform b [Mus musculus]_x0001_ref|NP_001157095.1| prolyl endopeptidase-like isoform b [Mus musculus]_x0001_ref|NP_001157096.1| prolyl endopeptidase-like isoform b [Mus musculus]_x0001_gb|AAH04612.1| Prepl protein [Mus musculus]_x0001_gb|EDL38595.1| prolyl endopeptidase-like, isoform CRA_a [Mus musculus]_x0001_gb|EDL38597.1| prolyl endopeptidase-like, isoform CRA_a [Mus …
CR373126.p.om.7	10	0.54	0.21	0.33	2.57143	gb|ACH70831.1|	proteasome (prosome, macropain) 26S subunit, non-ATPase, 6 [Salmo salar]_x0001_gb|ACI69175.1| 26S proteasome non-ATPase regulatory subunit 6 [Salmo salar]
AB038151.p.om.7	10	0.18	0.07	0.11	2.57143	ref|NP_001117708.1|	FTZ-F1 related protein [Oncorhynchus mykiss]_x0001_dbj|BAE71417.1| FTZ-F1 related protein [Oncorhynchus mykiss]
BX873043.p.om.7	46	2.18	0.85	1.33	2.56471	ref|NP_001073727.1|	snRNA-activating protein complex subunit 3 [Bos taurus]_x0001_gb|AAI09575.1| Small nuclear RNA activating complex, polypeptide 3, 50kDa [Bos taurus]_x0001_gb|DAA26942.1| small nuclear RNA activating complex, polypeptide 3, 50kDa [Bos taurus]
GE838287.p.om.7	10	0.41	0.16	0.25	2.5625	ref|NP_001133092.1|	serine/threonine-protein phosphatase PP1-gamma catalytic subunit [Salmo salar]_x0001_gb|ACH70679.1| protein phosphatase 1 catalytic subunit gamma isoform [Salmo salar]
CR375992.p.om.7	13	0.64	0.25	0.39	2.56	dbj|BAE78584.1|	anaphase-promoting complex subunit apc11 [Carassius auratus]
CT962862.p.om.7	13	0.64	0.25	0.39	2.56	ref|NP_001118022.1|	alpha-globin I [Oncorhynchus mykiss]_x0001_dbj|BAA13533.1| alpha-globin I [Oncorhynchus mykiss]
BX081321.p.om.7	10	0.46	0.18	0.29	2.55556	ref|NP_001135026.1|	chymotrypsin-like [Salmo salar]_x0001_gb|ACI69925.1| Chymotrypsin-like protease CTRL-1 precursor [Salmo salar]
CA384880.p.om.7	29	0.74	0.29	0.44	2.55172	ref|NP_001133600.1|	UDP-N-acetylglucosamine transporter [Salmo salar]_x0001_gb|ACI33550.1| UDP-N-acetylglucosamine transporter [Salmo salar]
BX912088.p.om.7	72	3.24	1.27	1.98	2.55118	ref|NP_001133605.1|	T-complex protein 1 subunit beta [Salmo salar]_x0001_gb|ACI33559.1| T-complex protein 1 subunit beta [Salmo salar]
CA343905.p.om.7	10	0.28	0.11	0.17	2.54545	gb|DAA23929.1|	cytoskeleton-associated protein 2 [Bos taurus]
CA351120.p.om.7	10	0.28	0.11	0.17	2.54545	gb|ACI67347.1|	Nicotinamide riboside kinase 2 [Salmo salar]_x0001_gb|ACI68780.1| Nicotinamide riboside kinase 2 [Salmo salar]
CA364599.p.om.7	10	0.28	0.11	0.17	2.54545	ref|NP_001138546.1|	kinesin family member 13B [Xenopus laevis]_x0001_gb|ACK86658.1| kinesin 13B [Xenopus laevis]
BX878512.p.om.7	13	0.61	0.24	0.37	2.54167	gb|EU621901.1|	Oncorhynchus tshawytscha clone ChinookGH2 growth hormone 2 gene, complete cds; and skeletal muscle sodium channel alpha subunit-like, myosin alkali light chain-like, and microtubule-associated protein Tau-like genes, complete sequence
CR375902.p.om.7	26	1.27	0.5	0.77	2.54	gb|AAX28478.2|	SJCHGC03032 protein [Schistosoma japonicum]
CA358790.p.om.7	26	0.99	0.39	0.6	2.53846	ref|NP_001107066.1|	E3 ubiquitin-protein ligase TRIM32 [Danio rerio]_x0001_gb|AAI54642.1| Trim32 protein [Danio rerio]_x0001_gb|AAI71687.1| Tripartite motif-containing 32 [Danio rerio]_x0001_gb|AAI71691.1| Tripartite motif-containing 32 [Danio rerio]
CX151842.p.om.7	91	5.78	2.28	3.5	2.53509	gb|ACM09069.1|	Succinate dehydrogenase cytochrome b560 subunit, mitochondrial precursor [Salmo salar]_x0001_gb|ACM09331.1| Succinate dehydrogenase cytochrome b560 subunit, mitochondrial precursor [Salmo salar]_x0001_gb|ACM09451.1| Succinate dehydrogenase cytochrome b560 subunit, mitochondrial precursor [Salmo salar]
BX297436.p.om.7	26	1.09	0.43	0.66	2.53488	ref|NP_001139930.1|	DNA-directed RNA polymerase III subunit RPC6 [Salmo salar]_x0001_gb|ACM08743.1| DNA-directed RNA polymerase III subunit RPC6 [Salmo salar]
GE832705.p.om.7	13	0.38	0.15	0.23	2.53333	gb|ACO08116.1|	NF-kappa-B inhibitor alpha [Oncorhynchus mykiss]
BX302819.p.om.7	10	0.43	0.17	0.27	2.52941	ref|NP_001134752.1|	Actin-related protein 2/3 complex subunit 5 [Salmo salar]_x0001_gb|ACI68715.1| Actin-related protein 2/3 complex subunit 5 [Salmo salar]_x0001_gb|ACM09843.1| Actin-related protein 2/3 complex subunit 5 [Salmo salar]
BX861392.p.om.7	26	1.21	0.48	0.73	2.52083	ref|NP_997963.1|	solute carrier family 2, facilitated glucose transporter member 8 [Danio rerio]_x0001_gb|AAH49409.1| Solute carrier family 2 (facilitated glucose transporter), member 8-like [Danio rerio]
BX857094.p.om.7	13	0.63	0.25	0.38	2.52	ref|NP_001167291.1|	Translation initiation factor eIF-2B subunit gamma [Salmo salar]_x0001_gb|ACN11296.1| Translation initiation factor eIF-2B subunit gamma [Salmo salar]
BX857920.p.om.7	55	2.97	1.18	1.79	2.51695	0	0
BX301861.p.om.7	2961	116.41	46.29	70.1	2.5148	ref|NP_001117997.1|	glutathione peroxidase type 2 [Oncorhynchus mykiss]_x0001_gb|AAV32968.1| glutathione peroxidase type 2 [Oncorhynchus mykiss]
BX873857.p.om.7	29	1.38	0.55	0.83	2.50909	ref|NP_001139841.1|	U6 snRNA-associated Sm-like protein LSm3 [Salmo salar]_x0001_gb|ACM08286.1| U6 snRNA-associated Sm-like protein LSm3 [Salmo salar]_x0001_gb|ACM08656.1| U6 snRNA-associated Sm-like protein LSm3 [Salmo salar]_x0001_gb|ACM09176.1| U6 snRNA-associated Sm-like protein LSm3 [Salmo salar]
BX074969.p.om.7	42	1.78	0.71	1.07	2.50704	gb|ACH70906.1|	ATP synthase, H+ transporting, mitochondrial F0 complex, subunit c-2 [Salmo salar]_x0001_gb|ACI66916.1| ATP synthase lipid-binding protein, mitochondrial precursor [Salmo salar]_x0001_gb|ACI69581.1| ATP synthase lipid-binding protein, mitochondrial precursor [Salmo salar]_x0001_gb|ACI69811.1| ATP synthase lipid-binding protein, mitochondrial precursor [Salmo salar]_x0001_gb|ACN10036.1| ATP syntha…
AB006448.p.om.7	9	0.1	0.04	0.05	2.5	ref|NP_001117651.1|	SOX9 [Oncorhynchus mykiss]_x0001_dbj|BAA24365.1| SOX9 [Oncorhynchus mykiss]
AF287487.p.om.7	6	0.1	0.04	0.06	2.5	gb|AAG25201.1|AF287487_1	MHC class I heavy chain precursor [Oncorhynchus mykiss]
AF334673.p.om.7	3	0.05	0.02	0.03	2.5	gb|AAK52722.1|AF334673_1	Wilms' tumor suppressor 2a [Oncorhynchus mykiss]
BX083177.p.om.7	3	0.1	0.04	0.06	2.5	prf||1806325A	cytochrome P450 aromatase
BX087461.p.om.7	16	0.65	0.26	0.38	2.5	ref|NP_957154.1|	ADP-ribosylation factor-like 4 [Danio rerio]_x0001_gb|AAH62856.1| ADP-ribosylation factor-like 4a [Danio rerio]
BX309960.p.om.7	3	0.1	0.04	0.05	2.5	ref|NP_001103159.1|	zinc finger protein 250 isoform b [Homo sapiens]_x0001_gb|EAW82029.1| zinc finger protein 250, isoform CRA_a [Homo sapiens]_x0001_gb|EAW82030.1| zinc finger protein 250, isoform CRA_a [Homo sapiens]_x0001_dbj|BAG10595.1| zinc finger protein 250 [synthetic construct]
BX319518.p.om.7	3	0.05	0.02	0.03	2.5	gb|AAI14256.1|	Bnip2 protein [Danio rerio]
BX862172.p.om.7	3	0.1	0.04	0.06	2.5	ref|NP_001099999.1|	kinesin family member 3B [Rattus norvegicus]_x0001_gb|EDL86006.1| kinesin family member 3B (predicted) [Rattus norvegicus]
CA342068.p.om.7	3	0.1	0.04	0.06	2.5	gb|EAW85349.1|	NOD3 protein, isoform CRA_b [Homo sapiens]
CA342822.p.om.7	3	0.1	0.04	0.06	2.5	emb|CAI39528.1|	laminin, gamma 3 [Homo sapiens]
CA344268.p.om.7	3	0.1	0.04	0.05	2.5	ref|NM_053324.1|	Rattus norvegicus synaptotagmin IX (Syt9), mRNA_x0001_gb|AF375461.1|AF375461 Rattus norvegicus synaptotagmin 5 mRNA, complete cds
CA345343.p.om.7	3	0.05	0.02	0.03	2.5	ref|NP_001133276.1|	NG,NG-dimethylarginine dimethylaminohydrolase 2 [Salmo salar]_x0001_gb|ACI32948.1| NG,NG-dimethylarginine dimethylaminohydrolase 2 [Salmo salar]
CA345445.p.om.7	3	0.05	0.02	0.03	2.5	ref|NP_001118096.1|	complement component C8 alpha chain [Oncorhynchus mykiss]_x0001_emb|CAH65481.2| complement component C8 alpha chain [Oncorhynchus mykiss]
CA357612.p.om.7	3	0.1	0.04	0.05	2.5	ref|NP_001165258.1|	sodium/glucose cotransporter member 1 [Salmo salar]_x0001_gb|ADB13172.1| sodium/glucose cotransporter member 1 [Salmo salar]
CA364984.p.om.7	3	0.1	0.04	0.05	2.5	gb|ACI33338.1|	Calreticulin precursor [Salmo salar]
CB487089.p.om.7	3	0.05	0.02	0.03	2.5	gb|ABO40692.1|	IS10 transposase [Enterobacteria phage CL707]
CB492083.p.om.7	3	0.1	0.04	0.05	2.5	ref|NP_001006091.1|	speedy protein A [Danio rerio]_x0001_gb|AAH83227.1| Speedy homolog A (Xenopus laevis) [Danio rerio]
CU073152.p.om.7	13	0.4	0.16	0.24	2.5	ref|NP_001135351.1|	ribonuclease P protein subunit p38 [Salmo salar]_x0001_gb|ACI68553.1| Ribonuclease P protein subunit p38 [Salmo salar]
CX033576.p.om.7	13	0.9	0.36	0.55	2.5	ref|NM_001139699.1|	Salmo salar c20orf149 protein (ppdpf), mRNA_x0001_gb|BT043760.1| Salmo salar clone HM6_1087 chromosome 20 open reading frame 149 (c20orf149) mRNA, complete cds
CX258620.p.om.7	3	0.1	0.04	0.06	2.5	gb|GQ505860.1|	Salmo salar clone BAC CHORI214-68O19 genomic sequence
CA351858.p.om.7	48	1.37	0.55	0.82	2.49091	ref|NP_001093178.1|	goliath homolog [Bos taurus]_x0001_gb|AAI42201.1| RNF130 protein [Bos taurus]
BX307624.p.om.7	32	1.32	0.53	0.78	2.49057	ref|NP_001071647.1|	chromo-helicase DNA-binding protein [Taeniopygia guttata]_x0001_gb|AAO61783.1| chromo-helicase DNA-binding protein [Taeniopygia guttata]
CX249722.p.om.7	29	1.94	0.78	1.17	2.48718	dbj|BAF37936.1|	Tc1-like transporase [Oncorhynchus mykiss]
CT962869.p.om.7	2335	112.32	45.17	67.1	2.48661	gb|ACN09863.1|	Hemoglobin subunit beta-1 [Salmo salar]_x0001_gb|ACN12210.1| Hemoglobin subunit beta-1 [Salmo salar]
CX039861.p.om.7	16	0.87	0.35	0.52	2.48571	pdb|3II6|X	Chain X, Structure Of Human Xrcc4 In Complex With The Tandem Brct Domains Of Dna Ligaseiv._x0001_pdb|3II6|Y Chain Y, Structure Of Human Xrcc4 In Complex With The Tandem Brct Domains Of Dna Ligaseiv.
CA349037.p.om.7	93	4.2	1.69	2.51	2.48521	gb|BC154458.1|	Danio rerio cDNA clone IMAGE:7405767
CA366506.p.om.7	16	0.82	0.33	0.49	2.48485	dbj|AK239312.1|	Sus scrofa mRNA, clone:THY010091A11, expressed in thymus
CA378249.p.om.7	13	0.77	0.31	0.47	2.48387	ref|NP_001134025.1|	CDK5 regulatory subunit-associated protein 1 [Salmo salar]_x0001_gb|ACI34332.1| CDK5 regulatory subunit-associated protein 1 [Salmo salar]
CX255509.p.om.7	16	0.77	0.31	0.46	2.48387	ref|NP_001108153.2|	cleavage and polyadenylation specificity factor subunit 1 [Danio rerio]
BX298647.p.om.7	16	0.67	0.27	0.4	2.48148	gb|EDL20640.1|	3-oxoacyl-ACP synthase, mitochondrial, isoform CRA_b [Mus musculus]
BX856849.p.om.7	29	1.29	0.52	0.78	2.48077	ref|NP_001117950.1|	calreticulin [Oncorhynchus mykiss]_x0001_gb|AAR17084.1| calreticulin [Oncorhynchus mykiss]
DV193675.p.om.7	16	1.86	0.75	1.11	2.48	gb|ACI34280.1|	Voltage-dependent anion-selective channel protein 2 [Salmo salar]
BX074011.p.om.7	13	0.52	0.21	0.32	2.47619	ref|NP_989096.1|	5'-nucleotidase, cytosolic IA [Xenopus (Silurana) tropicalis]_x0001_gb|AAH62488.1| 5'-nucleotidase, cytosolic IA [Xenopus (Silurana) tropicalis]
CR373799.p.om.7	3970	216.62	87.55	129	2.47424	ref|NP_001154074.1|	60S ribosomal protein L28 [Oncorhynchus mykiss]_x0001_gb|ACO07782.1| 60S ribosomal protein L28 [Oncorhynchus mykiss]
CX067730.p.om.7	67	10.04	4.07	5.97	2.46683	gb|ACY72563.1|	cytochrome oxidase subunit I [Lota lota]
BX869731.p.om.7	335	19.63	7.96	11.7	2.46608	gb|ACI69075.1|	60S ribosomal protein L11 [Salmo salar]_x0001_gb|ACN10061.1| 60S ribosomal protein L11 [Salmo salar]_x0001_gb|ACN12408.1| 60S ribosomal protein L11 [Salmo salar]
BX866708.p.om.7	19	0.91	0.37	0.54	2.45946	ref|XP_506110.1|	YALI0F31845p [Yarrowia lipolytica]_x0001_emb|CAG78924.1| YALI0F31845p [Yarrowia lipolytica]
BX871766.p.om.7	19	0.86	0.35	0.51	2.45714	ref|NP_001117004.1|	heat shock protein hsp90 beta [Salmo salar]_x0001_gb|AAD30275.1|AF135117_1 heat shock protein hsp90 beta [Salmo salar]
BX310624.p.om.7	10062	333.87	135.96	198	2.45565	gb|ACO07705.1|	Flavin reductase [Oncorhynchus mykiss]
CA351661.p.om.7	13	0.44	0.18	0.27	2.44444	gb|ACM08363.1|	Elongation factor 1-delta [Salmo salar]_x0001_gb|ACM08963.1| Elongation factor 1-delta [Salmo salar]
CA379344.p.om.7	13	0.22	0.09	0.13	2.44444	ref|NP_001155974.1|	condensin complex subunit 1 [Danio rerio]
BX074557.p.om.7	16	0.66	0.27	0.39	2.44444	ref|NP_775899.3|	dynein heavy chain 17, axonemal [Homo sapiens]
CX261294.p.om.7	16	0.61	0.25	0.36	2.44	pdb|1WXS|A	Chain A, Solution Structure Of Ufm1, A Ubiquitin-Fold Modifier
CR362399.p.om.7	19	1	0.41	0.59	2.43902	gb|EDM15772.1|	chromobox homolog 7, isoform CRA_b [Rattus norvegicus]
BX855752.p.om.7	16	0.73	0.3	0.44	2.43333	ref|NP_001133803.1|	K1456 protein [Salmo salar]_x0001_gb|ACI33925.1| methyltransferase KIAA1456 [Salmo salar]
BX087149.p.om.7	19	1.02	0.42	0.6	2.42857	gb|AAD53036.1|AF115539_1	proteasome delta [Oncorhynchus mykiss]
BX309284.p.om.7	3	0.17	0.07	0.09	2.42857	gb|ACO08779.1|	Rho-related GTP-binding protein RhoF [Oncorhynchus mykiss]
CA367009.p.om.7	3	0.17	0.07	0.09	2.42857	ref|NP_001103283.1|	angiopoietin-related protein 1 [Canis lupus familiaris]
CA381407.p.om.7	3	0.17	0.07	0.09	2.42857	gb|EDL30293.1|	procollagen, type VIII, alpha 2 [Mus musculus]
CN210995.p.om.7	3	0.17	0.07	0.09	2.42857	ref|NP_001133132.1|	ATP synthase subunit alpha, mitochondrial [Salmo salar]_x0001_gb|ACH70752.1| ATP synthase H+ transporting mitochondrial F1 complex alpha subunit 1 [Salmo salar]
CX029191.p.om.7	3	0.17	0.07	0.09	2.42857	gb|DAA24904.1|	fumarylacetoacetate hydrolase domain-containing protein 2A [Bos taurus]
CX137740.p.om.7	3	0.17	0.07	0.09	2.42857	gb|EAW56926.1|	Fc fragment of IgG binding protein [Homo sapiens]
CX139429.p.om.7	3	0.17	0.07	0.09	2.42857	pdb|1BB6|A	Chain A, Lysozyme Complex With 4-Methyl-Umbelliferyl Chitotriose_x0001_pdb|1BB7|A Chain A, Lysozyme Complex With 4-Methyl-Umbelliferyl Chitobiose_x0001_pdb|1LMC|A Chain A, The Crystal Structure Of A Complex Between Bulgecin, A Bacterial Metabolite, And Lysozyme From The Rainbow Trout_x0001_pdb|1LMN|A Chain A, The Refined Crystal Structure Of Lysozyme From The Rainbow Trout (Oncorhynchus Mykiss)_x…
BX088215.p.om.7	60	2.4	0.99	1.41	2.42424	ref|NP_001167324.1|	Ubiquitin-conjugating enzyme E2 Z [Salmo salar]_x0001_gb|ACN11361.1| Ubiquitin-conjugating enzyme E2 Z [Salmo salar]
BX877299.p.om.7	60	2.69	1.11	1.59	2.42342	gb|ACO08400.1|	NADH dehydrogenase flavoprotein 2, mitochondrial precursor [Oncorhynchus mykiss]
BX872207.p.om.7	22	0.75	0.31	0.44	2.41935	gb|EAW92131.1|	development and differentiation enhancing factor 1, isoform CRA_b [Homo sapiens]
BX079204.p.om.7	41	1.74	0.72	1.02	2.41667	gb|ACH70831.1|	proteasome (prosome, macropain) 26S subunit, non-ATPase, 6 [Salmo salar]_x0001_gb|ACI69175.1| 26S proteasome non-ATPase regulatory subunit 6 [Salmo salar]
CR375841.p.om.7	25	1.16	0.48	0.67	2.41667	dbj|BAD90027.1|	heat shock 70kDa protein 8 isoform b [Oncorhynchus mykiss]
CU064352.p.om.7	66	1.86	0.77	1.09	2.41558	gb|ACN10148.1|	Guanine nucleotide-binding protein subunit beta-2-like 1 [Salmo salar]_x0001_gb|ACN12499.1| Guanine nucleotide-binding protein subunit beta-2-like 1 [Salmo salar]
BX909448.p.om.7	38	1.57	0.65	0.93	2.41538	ref|NP_001133113.1|	26S protease regulatory subunit 7 [Salmo salar]_x0001_gb|ACH70710.1| 26S protease regulatory subunit 7 [Salmo salar]_x0001_gb|ACI67013.1| 26S protease regulatory subunit 7 [Salmo salar]
DV190790.p.om.7	91	3.93	1.63	2.3	2.41104	gb|ACI33503.1|	5-aminolevulinate synthase, nonspecific, mitochondrial precursor [Salmo salar]
BX080510.p.om.7	22	1.35	0.56	0.79	2.41071	gb|ACM08937.1|	C-Myc-binding protein [Salmo salar]
BX076708.p.om.7	3	0.12	0.05	0.07	2.4	gb|AAO13613.1|	AVIEF [Mus musculus]
BX077020.p.om.7	3	0.12	0.05	0.07	2.4	gb|ACI69564.1|	Heat shock protein beta-11 [Salmo salar]
BX077128.p.om.7	3	0.12	0.05	0.07	2.4	ref|NP_001156030.1|	ADP-ribosylation factor-like protein 8A [Ovis aries]_x0001_gb|ACR55763.1| ADP-ribosylation factor-like 8A [Ovis aries]
BX078509.p.om.7	3	0.12	0.05	0.07	2.4	ref|NP_001167219.1|	Hepatic leukemia factor [Salmo salar]_x0001_gb|ACN11126.1| Hepatic leukemia factor [Salmo salar]
BX081120.p.om.7	3	0.12	0.05	0.07	2.4	gb|ACN60244.1|	Fibronectin [Salmo salar]
BX295264.p.om.7	3	0.12	0.05	0.07	2.4	gb|AAF00096.2|AF114427_1	ventricular myosin heavy chain [Danio rerio]
BX297240.p.om.7	3	0.12	0.05	0.07	2.4	gb|ACN10178.1|	Thymidylate synthase [Salmo salar]_x0001_gb|ACN12532.1| Thymidylate synthase [Salmo salar]
BX299222.p.om.7	3	0.12	0.05	0.07	2.4	gb|AAI54268.1|	Fit2 protein [Danio rerio]
BX300168.p.om.7	3	0.12	0.05	0.07	2.4	ref|XP_002610434.1|	nk homeobox 3 [Branchiostoma floridae]_x0001_gb|EEN66444.1| nk homeobox 3 [Branchiostoma floridae]
BX301418.p.om.7	3	0.12	0.05	0.07	2.4	ref|NR_033768.1|	Homo sapiens transmembrane emp24 protein transport domain containing 11, pseudogene (TMED11P), non-coding RNA
BX301787.p.om.7	3	0.12	0.05	0.07	2.4	ref|NP_001018610.2|	SWI/SNF-related, matrix-associated actin-dependent regulator of chromatin, subfamily a, containing DEAD/H box 1 [Danio rerio]
BX302213.p.om.7	3	0.12	0.05	0.07	2.4	ref|NP_001133098.1|	conserved oligomeric Golgi complex subunit 2 [Salmo salar]_x0001_gb|ACH70688.1| component of oligomeric golgi complex 2 [Salmo salar]
BX303020.p.om.7	3	0.12	0.05	0.07	2.4	gb|ACI68030.1|	Triosephosphate isomerase [Salmo salar]_x0001_gb|ACN10206.1| Triosephosphate isomerase [Salmo salar]_x0001_gb|ACN12560.1| Triosephosphate isomerase [Salmo salar]
BX303133.p.om.7	3	0.12	0.05	0.07	2.4	ref|NP_001133633.1|	Importin subunit alpha-2 [Salmo salar]_x0001_gb|ACI33609.1| Importin subunit alpha-2 [Salmo salar]
BX308370.p.om.7	3	0.12	0.05	0.07	2.4	ref|NP_001166096.1|	TBC1 domain family member 15 [Danio rerio]
BX308475.p.om.7	3	0.12	0.05	0.07	2.4	gb|AC146502.2|	Danio rerio clone CH211-262M17, complete sequence
BX310112.p.om.7	3	0.12	0.05	0.07	2.4	gb|AAI69951.1|	Oocyte-specific histone mRNA stem-loop binding protein [Xenopus laevis]
BX311222.p.om.7	3	0.12	0.05	0.07	2.4	ref|NP_001135098.1|	homeobox protein HoxB9ab [Salmo salar]_x0001_gb|ABV82069.1| homeobox protein HoxB9ab [Salmo salar]_x0001_gb|ABW77474.1| homeobox protein HoxB9ab [Salmo salar]
BX318295.p.om.7	3	0.12	0.05	0.07	2.4	gb|ACN58727.1|	DNA-directed RNA polymerase III subunit RPC2 [Salmo salar]
BX319353.p.om.7	3	0.12	0.05	0.07	2.4	ref|NP_001140072.1|	ras-related protein Rab-25 [Salmo salar]_x0001_gb|ACM09507.1| Ras-related protein Rab-25 [Salmo salar]
BX857259.p.om.7	3	0.12	0.05	0.07	2.4	gb|ACI66080.1|	Mitochondrial inner membrane protease subunit 2 [Salmo salar]
BX870836.p.om.7	3	0.12	0.05	0.07	2.4	gb|AAB62190.1|	purinergic receptor P2Y5 [Homo sapiens]
BX879311.p.om.7	3	0.12	0.05	0.07	2.4	ref|NP_001134769.1|	Transcription initiation factor IIB [Salmo salar]_x0001_gb|ACI68803.1| Transcription initiation factor IIB [Salmo salar]
BX879389.p.om.7	3	0.12	0.05	0.07	2.4	gb|ABU87822.1|	delta5-desaturase-like protein [Oncorhynchus masou]
BX890347.p.om.7	3	0.12	0.05	0.07	2.4	gb|ACH70646.1|	NADH dehydrogenase (ubiquinone) 1 alpha subcomplex [Salmo salar]_x0001_gb|ACI69541.1| NADH dehydrogenase 1 alpha subcomplex subunit 8 [Salmo salar]
BX910075.p.om.7	3	0.12	0.05	0.07	2.4	gb|DAA16396.1|	ring finger protein 5 [Bos taurus]
CA342108.p.om.7	3	0.12	0.05	0.07	2.4	gb|ACM09431.1|	Ig kappa chain V-IV region JI precursor [Salmo salar]
CA357792.p.om.7	3	0.12	0.05	0.07	2.4	gb|AAY79328.1|	PsTX-20A [Siniperca chuatsi]
CA362628.p.om.7	28	0.72	0.3	0.42	2.4	ref|NP_001016333.1|	COX18 cytochrome c oxidase assembly homolog [Xenopus (Silurana) tropicalis]
CA368576.p.om.7	3	0.12	0.05	0.07	2.4	gb|ABF20548.1|	transposase [Ciona savignyi]
CA370968.p.om.7	3	0.12	0.05	0.07	2.4	ref|NP_001153946.1|	gastric chitinase [Oncorhynchus mykiss]_x0001_gb|ACG58867.1| gastric chitinase [Oncorhynchus mykiss]
CB486510.p.om.7	6	0.12	0.05	0.07	2.4	pdb|2R9Y|A	Chain A, Structure Of Antiplasmin
CX040539.p.om.7	6	0.12	0.05	0.07	2.4	gb|AAH66705.1|	Hbegf protein [Danio rerio]
D16513.p.om.7	6	0.12	0.05	0.07	2.4	gb|AAB17254.1|	Pit-1 [Oncorhynchus tshawytscha]
BX299562.p.om.7	53	2.46	1.03	1.43	2.38835	gb|AAY59704.1|	fumarate hydratase [Cricetulus griseus]
CA367690.p.om.7	50	2.17	0.91	1.26	2.38462	ref|NP_001133482.1|	T-complex protein 1 subunit delta [Salmo salar]_x0001_gb|ACI33323.1| T-complex protein 1 subunit delta [Salmo salar]
CA364431.p.om.7	56	1.12	0.47	0.65	2.38298	gb|ACY30364.1|	von Willebrand factor A domain containing 5A [Salmo salar]
BX874822.p.om.7	25	1.19	0.5	0.69	2.38	gb|ACN10224.1|	Phenazine biosynthesis-like domain-containing protein 2 [Salmo salar]_x0001_gb|ACN12579.1| Phenazine biosynthesis-like domain-containing protein 2 [Salmo salar]
CU070913.p.om.7	18399	828.18	348.54	480	2.37614	gb|ACO08020.1|	Hemoglobin subunit beta-4 [Oncorhynchus mykiss]_x0001_gb|ACO08038.1| Hemoglobin subunit beta-4 [Oncorhynchus mykiss]
BX889005.p.om.7	6	0.19	0.08	0.1	2.375	ref|NP_001135149.1|	AMP deaminase 1 [Salmo salar]_x0001_gb|ACH70621.1| adenosine monophosphate deaminase 1 [Salmo salar]
CA343672.p.om.7	13	0.19	0.08	0.12	2.375	gb|ACN60243.1|	Leukocyte common antigen precursor [Salmo salar]
CX262236.p.om.7	3	0.19	0.08	0.1	2.375	gb|DAA28928.1|	N-deacetylase/N-sulfotransferase 3 [Bos taurus]
GE822316.p.om.7	3	0.19	0.08	0.11	2.375	gb|ACO08149.1|	NADH dehydrogenase 1 beta subcomplex subunit 11, mitochondrial precursor [Oncorhynchus mykiss]
GE837018.p.om.7	31	1.92	0.81	1.11	2.37037	gb|AC008626.6|	Homo sapiens chromosome 19 clone CTB-159G17, complete sequence
BX296750.p.om.7	6	0.26	0.11	0.14	2.36364	ref|NP_001026387.1|	RPE-retinal G protein-coupled receptor [Gallus gallus]_x0001_gb|AAR02099.1| retinal g-protein receptor opsin [Gallus gallus]
BX300562.p.om.7	6	0.26	0.11	0.14	2.36364	ref|NP_001134626.1|	Radial spoke head 1 homolog [Salmo salar]_x0001_gb|ACI68258.1| Radial spoke head 1 homolog [Salmo salar]
BX311402.p.om.7	6	0.26	0.11	0.14	2.36364	ref|NP_001133236.1|	ATP-dependent RNA helicase DDX51 [Salmo salar]_x0001_gb|ACI32879.1| ATP-dependent RNA helicase DDX51 [Salmo salar]
BX319739.p.om.7	6	0.26	0.11	0.14	2.36364	ref|XP_415419.2|	PREDICTED: similar to KIAA0310 protein [Gallus gallus]
BX862137.p.om.7	9	0.26	0.11	0.14	2.36364	gb|AAH68322.2|	Frizzled homolog 7a [Danio rerio]_x0001_emb|CAQ14672.1| frizzled homolog 7a [Danio rerio]
CR370645.p.om.7	6	0.26	0.11	0.14	2.36364	gb|ACN10336.1|	Phosphate carrier protein, mitochondrial precursor [Salmo salar]_x0001_gb|ACN12696.1| Phosphate carrier protein, mitochondrial precursor [Salmo salar]
GE822582.p.om.7	6	0.26	0.11	0.14	2.36364	gb|ACO07704.1|	CobIyrinic acid a,c-diamide adenosyltransferase, mitochondrial precursor [Oncorhynchus mykiss]
BX864857.p.om.7	25	0.59	0.25	0.34	2.36	ref|NP_001002093.1|	tubulin delta chain [Danio rerio]_x0001_gb|AAH71532.1| Tubulin, delta 1 [Danio rerio]
BX076155.p.om.7	37	1.58	0.67	0.9	2.35821	ref|XP_682732.4|	PREDICTED: si:ch211-198k9.5 [Danio rerio]
CU065730.p.om.7	25	0.73	0.31	0.43	2.35484	ref|NM_001045232.1|	Danio rerio SCO cytochrome oxidase deficient homolog 2 (yeast) (sco2), nuclear gene encoding mitochondrial protein, mRNA
BX913485.p.om.7	68	2.89	1.23	1.66	2.34959	emb|CAK04057.1|	groucho 2 [Danio rerio]
CA342091.p.om.7	68	5.31	2.26	3.06	2.34956	emb|CAL56005.1|	Predicted membrane protein (patched superfamily) (ISS) [Ostreococcus tauri]
CA351580.p.om.7	188	6.27	2.67	3.6	2.34831	gb|ACM08273.1|	Peptidyl-prolyl cis-trans isomerase, mitochondrial precursor [Salmo salar]_x0001_gb|ACM08579.1| Peptidyl-prolyl cis-trans isomerase, mitochondrial precursor [Salmo salar]
BX310602.p.om.7	40	1.08	0.46	0.62	2.34783	gb|ACC99349.1|	ULF [Homo sapiens]
CX721330.p.om.7	323	17.6	7.52	10.1	2.34043	gb|ACO15357.1|	40S ribosomal protein S20 [Caligus clemensi]
BX305445.p.om.7	37	1.59	0.68	0.91	2.33824	ref|NP_001133901.1|	Dual specificity protein phosphatase 22-A [Salmo salar]_x0001_gb|ACI34110.1| Dual specificity protein phosphatase 22-A [Salmo salar]
BK005093.p.om.7	215	4.32	1.85	2.47	2.33514	tpg|DAA04578.1|	TPA_inf: RTN4-M [Oncorhynchus mykiss]
AF209872.p.om.7	6	0.07	0.03	0.04	2.33333	ref|NP_001117742.1|	SOX9 alpha2 [Oncorhynchus mykiss]_x0001_gb|AAG43497.1|AF209872_1 SOX9 alpha2 [Oncorhynchus mykiss]
BX073691.p.om.7	6	0.28	0.12	0.15	2.33333	gb|ACI34364.1|	disulfide-isomerase A6 precursor [Salmo salar]
BX073989.p.om.7	3	0.07	0.03	0.04	2.33333	dbj|BAF93448.1|	homeodomain-interacting protein kinase 4 [Mus musculus]
BX080507.p.om.7	3	0.14	0.06	0.08	2.33333	gb|ACO09882.1|	MyoD family inhibitor [Osmerus mordax]
BX082903.p.om.7	3	0.14	0.06	0.08	2.33333	gb|EDL91048.1|	all-trans-13,14-dihydroretinol saturase, isoform CRA_b [Rattus norvegicus]
BX083943.p.om.7	3	0.14	0.06	0.08	2.33333	ref|NP_955912.1|	arachidonate 12-lipoxygenase, 12S-type [Danio rerio]_x0001_gb|AAH54621.1| Arachidonate 12-lipoxygenase [Danio rerio]
BX086358.p.om.7	6	0.14	0.06	0.08	2.33333	gb|AAI05480.1|	Phosphoglycerate dehydrogenase [Bos taurus]_x0001_gb|DAA31565.1| D-3-phosphoglycerate dehydrogenase [Bos taurus]
BX296720.p.om.7	3	0.07	0.03	0.04	2.33333	ref|NP_001135206.1|	cell division protein kinase 2 [Salmo salar]_x0001_gb|ACI33265.1| Cell division protein kinase 2 [Salmo salar]
BX298211.p.om.7	3	0.14	0.06	0.08	2.33333	ref|NP_001117692.1|	carbonic anhydrase 1 [Oncorhynchus mykiss]_x0001_dbj|BAD36835.2| carbonic anhydrase 1 [Oncorhynchus mykiss]
BX298600.p.om.7	3	0.07	0.03	0.04	2.33333	ref|NP_001027778.1|	multiple tissue opsin [Takifugu rubripes]_x0001_gb|AAM90677.1|AF402774_1 multiple tissue opsin [Takifugu rubripes]
BX299214.p.om.7	3	0.14	0.06	0.08	2.33333	ref|NP_001135173.1|	general transcription factor IIE, polypeptide 2-2 [Salmo salar]_x0001_gb|ACH70943.1| general transcription factor IIE, polypeptide 2-2 [Salmo salar]
BX309292.p.om.7	3	0.07	0.03	0.04	2.33333	gb|EDL29682.1|	transmembrane serine protease 6, isoform CRA_d [Mus musculus]
BX317177.p.om.7	3	0.07	0.03	0.04	2.33333	gb|EAW97373.1|	FLJ21963 protein, isoform CRA_b [Homo sapiens]
BX317505.p.om.7	6	0.21	0.09	0.11	2.33333	ref|NP_001139328.1|	SH3 domain-binding protein 2 isoform b [Homo sapiens]
BX320867.p.om.7	3	0.07	0.03	0.04	2.33333	gb|EDK98712.1|	zinc and ring finger 2, isoform CRA_b [Mus musculus]
BX320882.p.om.7	3	0.14	0.06	0.08	2.33333	gb|ACI68643.1|	Methionine aminopeptidase 1D, mitochondrial precursor [Salmo salar]
BX857773.p.om.7	3	0.14	0.06	0.08	2.33333	gb|AAM21123.1|AF498976_1	small GTP binding protein TC10 [Homo sapiens]_x0001_gb|AAA36547.1| ras-like protein [Homo sapiens]
BX858304.p.om.7	3	0.14	0.06	0.08	2.33333	gb|AAT68031.1|	NP95 [Danio rerio]
BX863135.p.om.7	3	0.14	0.06	0.08	2.33333	dbj|BAE45305.1|	receptor activity modifying protein 1 [Takifugu obscurus]
BX867030.p.om.7	3	0.21	0.09	0.12	2.33333	gb|ADC93707.1|	peptidoglycan recognition protein L1 [Sebastes schlegelii]
BX869063.p.om.7	3	0.14	0.06	0.08	2.33333	dbj|BAE45305.1|	receptor activity modifying protein 1 [Takifugu obscurus]
BX872647.p.om.7	3	0.14	0.06	0.08	2.33333	gb|AAI27496.1|	Rem2 protein [Rattus norvegicus]
BX873586.p.om.7	3	0.14	0.06	0.08	2.33333	ref|NP_001133937.1|	Arginyl-tRNA synthetase, cytoplasmic [Salmo salar]_x0001_gb|ACI34174.1| Arginyl-tRNA synthetase, cytoplasmic [Salmo salar]
BX874847.p.om.7	3	0.14	0.06	0.08	2.33333	gb|ACN10474.1|	Wiskott-Aldrich syndrome protein homolog [Salmo salar]
BX875513.p.om.7	15	0.35	0.15	0.19	2.33333	gb|AAI51860.1|	Si:dkey-239i20.2 protein [Danio rerio]
BX881959.p.om.7	89	4.9	2.1	2.8	2.33333	ref|NP_001077311.1|	SUMO1/sentrin/SMT3 specific peptidase 3b [Danio rerio]_x0001_gb|AAI34842.1| Senp3b protein [Danio rerio]
BX882535.p.om.7	3	0.14	0.06	0.08	2.33333	gb|ACM09615.1|	CWC15 homolog [Salmo salar]
BX883840.p.om.7	3	0.14	0.06	0.08	2.33333	ref|NP_001140074.1|	ubiquitin carboxyl-terminal hydrolase isozyme L3 [Salmo salar]_x0001_gb|ACM09512.1| Ubiquitin carboxyl-terminal hydrolase isozyme L3 [Salmo salar]
BX884367.p.om.7	3	0.14	0.06	0.08	2.33333	gb|ACO09882.1|	MyoD family inhibitor [Osmerus mordax]
BX889169.p.om.7	3	0.14	0.06	0.08	2.33333	ref|NP_001158757.1|	Chromobox protein homolog 1 [Salmo salar]_x0001_gb|ACN10302.1| Chromobox protein homolog 1 [Salmo salar]_x0001_gb|ACN12662.1| Chromobox protein homolog 1 [Salmo salar]
CA342234.p.om.7	3	0.07	0.03	0.04	2.33333	ref|XP_687879.2|	PREDICTED: si:dkeyp-75h12.2 [Danio rerio]
CA342703.p.om.7	3	0.14	0.06	0.08	2.33333	ref|NP_001070621.1|	zinc finger protein 36, C3H type-like 2 [Danio rerio]_x0001_gb|AAI24506.1| Zinc finger protein 36, C3H type-like 2 [Danio rerio]_x0001_gb|AAI65552.1| Zfp36l2 protein [Danio rerio]
CA343266.p.om.7	3	0.14	0.06	0.08	2.33333	ref|NP_001134728.1|	B-cell lymphoma/leukemia 10 [Salmo salar]_x0001_gb|ACI68615.1| B-cell lymphoma/leukemia 10 [Salmo salar]
CA347957.p.om.7	3	0.14	0.06	0.08	2.33333	gb|AAB64301.1|	GTP-binding protein alpha q [Homo sapiens]
CA349429.p.om.7	3	0.14	0.06	0.08	2.33333	ref|NP_001002483.1|	transcription factor Sox-1a [Danio rerio]_x0001_gb|AAH76326.1| SRY-box containing gene 1a [Danio rerio]_x0001_gb|AAI64138.1| Sox1a protein [Danio rerio]
CA349522.p.om.7	6	0.21	0.09	0.11	2.33333	gb|AAY79328.1|	PsTX-20A [Siniperca chuatsi]
CA350704.p.om.7	3	0.14	0.06	0.08	2.33333	gb|ABM21528.1|	methyl transferase [Psetta maxima]
CA350929.p.om.7	3	0.14	0.06	0.08	2.33333	ref|NP_001034921.1|	limbic system-associated membrane protein [Danio rerio]_x0001_gb|ABD33496.1| limbic system-associated membrane protein [Danio rerio]
CA354690.p.om.7	3	0.14	0.06	0.08	2.33333	ref|NP_001089187.1|	Werner helicase interacting protein 1 [Xenopus laevis]_x0001_dbj|BAD98297.1| Werner helicase interacting protein 1 [Xenopus laevis]
CA355092.p.om.7	3	0.07	0.03	0.04	2.33333	ref|NP_001002874.1|	DNA replication complex GINS protein PSF3 [Danio rerio]_x0001_gb|AAT68050.1| FLJ13912-like [Danio rerio]_x0001_gb|AAH78185.2| GINS complex subunit 3 [Danio rerio]
CA356635.p.om.7	6	0.28	0.12	0.16	2.33333	gb|AAI18676.1|	Si:busm1-189a20.4 protein [Danio rerio]
CA359169.p.om.7	3	0.07	0.03	0.04	2.33333	gb|ACQ58112.1|	Troponin I, slow skeletal muscle [Anoplopoma fimbria]
CA359260.p.om.7	3	0.14	0.06	0.08	2.33333	dbj|BAA07195.1|	sodium channel alpha subunit [Takifugu rubripes]
CA365587.p.om.7	3	0.21	0.09	0.12	2.33333	gb|ACS52175.2|	stabilin 2 [Danio rerio]
CA372557.p.om.7	9	0.21	0.09	0.11	2.33333	gb|EAW51535.1|	formin-like 1, isoform CRA_b [Homo sapiens]
CB490064.p.om.7	3	0.21	0.09	0.12	2.33333	ref|NP_001071043.2|	thyroid hormone receptor interactor 4 [Danio rerio]
CB490949.p.om.7	3	0.28	0.12	0.16	2.33333	ref|NP_001117917.1|	oocyte protease inhibitor-1 [Oncorhynchus mykiss]_x0001_gb|AAM14742.1| oocyte protease inhibitor-1 [Oncorhynchus mykiss]
CB491204.p.om.7	3	0.07	0.03	0.04	2.33333	ref|NP_958445.1|	large proline-rich protein BAT3 [Danio rerio]_x0001_gb|AAH52476.1| HLA-B-associated transcript 3 [Danio rerio]
CB496757.p.om.7	3	0.07	0.03	0.04	2.33333	ref|NP_001154942.1|	kinesin family member 20A [Danio rerio]
CB498038.p.om.7	3	0.07	0.03	0.04	2.33333	ref|NP_001134007.1|	Endothelial lipase [Salmo salar]_x0001_gb|ACI34299.1| Endothelial lipase precursor [Salmo salar]
CR368903.p.om.7	3	0.07	0.03	0.04	2.33333	ref|XP_001846300.1|	conserved hypothetical protein [Culex quinquefasciatus]_x0001_gb|EDS43311.1| conserved hypothetical protein [Culex quinquefasciatus]
CR374459.p.om.7	3	0.14	0.06	0.08	2.33333	ref|NP_001133382.1|	U3 small nucleolar RNA-associated protein 18 homolog [Salmo salar]_x0001_gb|ACI33125.1| U3 small nucleolar RNA-associated protein 18 homolog [Salmo salar]
CR375876.p.om.7	3	0.14	0.06	0.08	2.33333	gb|AC155647.14|	Mus musculus 6 BAC RP24-151A23 (Roswell Park Cancer Institute (C57BL/6J Male) Mouse BAC Library) complete sequence
CU066367.p.om.7	3	0.07	0.03	0.04	2.33333	ref|NP_001134241.1|	replication factor C subunit 4 [Salmo salar]_x0001_gb|ACI66752.1| Replication factor C subunit 4 [Salmo salar]
CU066572.p.om.7	3	0.07	0.03	0.04	2.33333	gb|AAI45584.1|	Ankyrin repeat and FYVE domain containing 1 [Mus musculus]
CU071795.p.om.7	3	0.07	0.03	0.04	2.33333	gb|EAW67879.1|	nucleoporin 160kDa, isoform CRA_b [Homo sapiens]
CU072072.p.om.7	3	0.07	0.03	0.04	2.33333	gb|ACM09463.1|	Uridine-cytidine kinase 2 [Salmo salar]
CU072310.p.om.7	6	0.14	0.06	0.08	2.33333	gb|ACN58594.1|	Poly synthetase 1 [Salmo salar]
CU072938.p.om.7	12	0.28	0.12	0.16	2.33333	gb|DAA19655.1|	zinc finger protein 574 [Bos taurus]
CU072985.p.om.7	3	0.07	0.03	0.04	2.33333	gb|ACN11176.1|	Baculoviral IAP repeat-containing protein 4 [Salmo salar]
CX006144.p.om.7	3	0.14	0.06	0.08	2.33333	gb|ABG37914.1|	cytochrome oxidase subunit 1 [Oncorhynchus masou masou]
CX027199.p.om.7	3	0.14	0.06	0.08	2.33333	ref|NP_001017745.1|	CCAAT/enhancer-binding protein zeta [Danio rerio]_x0001_gb|AAH93205.1| Zgc:112104 [Danio rerio]_x0001_gb|AAI64346.1| Zgc:112104 protein [Danio rerio]
CX034635.p.om.7	3	0.14	0.06	0.08	2.33333	gb|ACO13194.1|	Cell division control protein 42 homolog precursor [Esox lucius]
CX123812.p.om.7	3	0.14	0.06	0.08	2.33333	gb|ACM09423.1|	Ribosome biogenesis regulatory protein homolog [Salmo salar]
CX252267.p.om.7	3	0.14	0.06	0.08	2.33333	ref|NP_001133815.1|	sorting nexin-2 [Salmo salar]_x0001_gb|ACI33942.1| Sorting nexin-2 [Salmo salar]
CX262306.p.om.7	3	0.21	0.09	0.12	2.33333	ref|XP_001109042.1|	PREDICTED: histone H3.3-like isoform 1 [Macaca mulatta]_x0001_ref|XP_002799880.1| PREDICTED: histone H3.3-like isoform 2 [Macaca mulatta]
EU853718.p.om.7	3	0.28	0.12	0.16	2.33333	gb|ACF59734.1|	solute carrier family 15 member 1 [Oncorhynchus mykiss]
GE839014.p.om.7	3	0.14	0.06	0.08	2.33333	ref|NP_001100767.1|	rho GTPase-activating protein 22 [Rattus norvegicus]_x0001_gb|EDL88903.1| Rho GTPase activating protein 22 (predicted) [Rattus norvegicus]
BX297624.p.om.7	83	3.33	1.43	1.91	2.32867	ref|NP_956312.1|	bleomycin hydrolase [Danio rerio]_x0001_gb|AAH55572.1| Bleomycin hydrolase [Danio rerio]
CX260029.p.om.7	31	0.79	0.34	0.46	2.32353	ref|NP_001134994.1|	kinase C alpha type [Salmo salar]_x0001_gb|ACI69770.1| kinase C alpha type [Salmo salar]
BX873645.p.om.7	98	4.64	2	2.64	2.32	ref|XP_002035242.1|	GM14032 [Drosophila sechellia]_x0001_gb|EDW50378.1| GM14032 [Drosophila sechellia]
CA382510.p.om.7	3	0.44	0.19	0.24	2.31579	gb|ACH85284.1|	myomesin 2 [Salmo salar]
CA384485.p.om.7	9	0.44	0.19	0.24	2.31579	ref|NP_001133205.1|	ribosomal protein L10a-2 [Salmo salar]_x0001_gb|ACH70976.1| ribosomal protein L10a-2 [Salmo salar]_x0001_gb|ACN09827.1| 60S ribosomal protein L10a [Salmo salar]_x0001_gb|ACN12174.1| 60S ribosomal protein L10a [Salmo salar]
BX300390.p.om.7	9	0.37	0.16	0.21	2.3125	ref|NP_001088643.2|	sister chromatid cohesion protein PDS5 homolog B-B [Xenopus laevis]
GE833265.p.om.7	52	2.31	1	1.31	2.31	gb|AAT68148.1|	TA-WDRP-like [Danio rerio]
GE829143.p.om.7	49	1.94	0.84	1.11	2.30952	gb|ACO07731.1|	Histone H1x [Oncorhynchus mykiss]
BX872594.p.om.7	6	0.3	0.13	0.17	2.30769	gb|ABD38643.1|	olfactomedin 4-like protein precursor [Ictalurus punctatus]
BX910535.p.om.7	6	0.3	0.13	0.17	2.30769	gb|ACI68460.1|	39S ribosomal protein L44, mitochondrial precursor [Salmo salar]
CA343353.p.om.7	6	0.3	0.13	0.17	2.30769	ref|NP_001170967.1|	UDP glucuronosyltransferase 5 family, polypeptide D1 [Danio rerio]_x0001_gb|ADC91984.1| UDP glucuronosyltransferase 5 family polypeptide d1 [Danio rerio]
CA354088.p.om.7	6	0.3	0.13	0.17	2.30769	ref|NP_001077130.1|	importin-4 [Bos taurus]_x0001_gb|AAI34504.1| IPO4 protein [Bos taurus]_x0001_gb|DAA25737.1| importin 4 [Bos taurus]
CR373149.p.om.7	6	0.3	0.13	0.17	2.30769	emb|CAJ83707.1|	aminoadipate aminotransferase [Xenopus tropicalis]
BX077429.p.om.7	12	0.53	0.23	0.29	2.30435	gb|ACI67581.1|	Elongation factor 1-beta [Salmo salar]
CB492170.p.om.7	283	18.21	7.91	10.3	2.30215	ref|YP_214904.2|	cytochrome c oxidase subunit II [Oncorhynchus clarkii henshawi]
BX081275.p.om.7	6	0.23	0.1	0.13	2.3	gb|AAH27746.1|	Plcl2 protein [Mus musculus]
BX300754.p.om.7	15	0.46	0.2	0.25	2.3	gb|ABW96885.1|	Elipsa [Danio rerio]
BX308542.p.om.7	6	0.23	0.1	0.13	2.3	ref|NP_001134438.1|	Dehydrogenase/reductase SDR family member 4 [Salmo salar]_x0001_gb|ACI67513.1| Dehydrogenase/reductase SDR family member 4 [Salmo salar]
BX880686.p.om.7	6	0.23	0.1	0.13	2.3	ref|NP_001158615.1|	PRA1 family protein 3 [Oncorhynchus mykiss]_x0001_gb|ACO08481.1| PRA1 family protein 3 [Oncorhynchus mykiss]
BX908871.p.om.7	6	0.23	0.1	0.13	2.3	ref|NP_989476.1|	ATP-binding cassette sub-family A member 1 [Gallus gallus]_x0001_gb|AAL56247.1|AF362377_1 ATP-binding cassette transporter 1 [Gallus gallus]
CA348526.p.om.7	3	0.46	0.2	0.25	2.3	gb|ACQ58707.1|	40S ribosomal protein S9 [Anoplopoma fimbria]
BX319575.p.om.7	12	0.62	0.27	0.34	2.2963	ref|NP_001134069.1|	Sodium/potassium-transporting ATPase subunit beta-233 [Salmo salar]_x0001_gb|ACI66117.1| Sodium/potassium-transporting ATPase subunit beta-233 [Salmo salar]
BX312484.p.om.7	9	0.39	0.17	0.21	2.29412	ref|NP_001140112.1|	BTB/POZ domain-containing protein KCTD17 [Salmo salar]_x0001_gb|ACM09772.1| BTB/POZ domain-containing protein KCTD17 [Salmo salar]
BX879421.p.om.7	9	0.39	0.17	0.22	2.29412	ref|NP_001071211.1|	septin-7 isoform 1 [Danio rerio]_x0001_gb|AAI25859.1| Septin 7b [Danio rerio]
BX886760.p.om.7	9	0.39	0.17	0.22	2.29412	gb|ACM09122.1|	SFRS12IP1 [Salmo salar]
CR375379.p.om.7	9	0.39	0.17	0.22	2.29412	gb|AAH01404.2|	SEC16A protein [Homo sapiens]
CR375602.p.om.7	9	0.39	0.17	0.22	2.29412	ref|NP_001133155.1|	protein arginine N-methyltransferase 1 [Salmo salar]_x0001_gb|ACH70817.1| protein arginine methyltransferase 1 [Salmo salar]
CU072182.p.om.7	15	0.39	0.17	0.22	2.29412	gb|AAH72771.1|	Cdt1 protein [Xenopus laevis]
BX862384.p.om.7	12	0.55	0.24	0.3	2.29167	gb|AAD40013.1|	small zinc finger-like protein [Danio rerio]
BX087613.p.om.7	85	4.76	2.08	2.68	2.28846	gb|ACM08454.1|	Derlin-2 [Salmo salar]
DV198760.p.om.7	306	80.91	35.39	45.5	2.28624	gb|ACO07713.1|	60S ribosomal protein L26 [Oncorhynchus mykiss]
AY100460.p.om.7	3	0.16	0.07	0.09	2.28571	gb|ACR23344.1|	insulin-like growth factor 1b receptor [Oncorhynchus kisutch]
BX083678.p.om.7	3	0.16	0.07	0.09	2.28571	ref|NP_001003742.1|	4-hydroxyphenylpyruvate dioxygenase [Danio rerio]_x0001_gb|AAH77167.1| 4-hydroxyphenylpyruvate dioxygenase [Danio rerio]_x0001_gb|AAI65880.1| Hpd protein [Danio rerio]
BX303428.p.om.7	3	0.16	0.07	0.09	2.28571	gb|AAX36781.1|	TAF11 RNA polymerase II TATA box-binding protein [synthetic construct]
BX304267.p.om.7	3	0.16	0.07	0.09	2.28571	ref|NP_001124213.1|	inter-alpha (globulin) inhibitor H2 [Gallus gallus]_x0001_gb|ACE79193.1| inter-alpha inhibitor heavy chain 2 precursor [Gallus gallus]
BX308668.p.om.7	3	0.16	0.07	0.09	2.28571	gb|AAI60858.1|	Pms2 protein [Rattus norvegicus]
BX310013.p.om.7	18	0.48	0.21	0.27	2.28571	emb|CAM19891.1|	SPEN homolog, transcriptional regulator (Drosophila) [Mus musculus]_x0001_emb|CAM20393.1| SPEN homolog, transcriptional regulator (Drosophila) [Mus musculus]
BX316900.p.om.7	6	0.16	0.07	0.09	2.28571	ref|NP_001070781.2|	dipeptidyl peptidase 9 [Danio rerio]
BX317968.p.om.7	9	0.32	0.14	0.18	2.28571	ref|NP_001133834.1|	Exosome component 10 [Salmo salar]_x0001_gb|ACI33988.1| Exosome component 10 [Salmo salar]
BX871300.p.om.7	6	0.32	0.14	0.18	2.28571	ref|XP_001337289.1|	PREDICTED: si:dkey-88l16.3 [Danio rerio]
BX883215.p.om.7	3	0.16	0.07	0.09	2.28571	ref|NP_001016475.1|	tektin 3 [Xenopus (Silurana) tropicalis]_x0001_emb|CAJ82960.1| tektin 3 [Xenopus tropicalis]_x0001_gb|AAI35258.1| tektin 3 [Xenopus (Silurana) tropicalis]
BX888672.p.om.7	6	0.32	0.14	0.18	2.28571	ref|NP_955925.1|	rac GTPase-activating protein 1 [Danio rerio]_x0001_gb|AAH63983.1| Rac GTPase-activating protein 1 [Danio rerio]
CA342400.p.om.7	6	0.16	0.07	0.09	2.28571	gb|ACO09181.1|	L-asparaginase 1 precursor [Osmerus mordax]
CA346468.p.om.7	3	0.16	0.07	0.09	2.28571	emb|CAD90769.1|	Battenin-like protein [Crassostrea gigas]
CA350474.p.om.7	6	0.32	0.14	0.18	2.28571	ref|NP_001072610.1|	DIP2 disco-interacting protein 2 homolog C [Xenopus (Silurana) tropicalis]_x0001_gb|AAI22992.1| DIP2 disco-interacting protein 2 homolog C [Xenopus (Silurana) tropicalis]
CA351702.p.om.7	3	0.16	0.07	0.09	2.28571	ref|NP_001171134.1|	telomere-associated protein RIF1 isoform 2 [Homo sapiens]_x0001_ref|NP_001171135.1| telomere-associated protein RIF1 isoform 2 [Homo sapiens]_x0001_ref|NP_001171136.1| telomere-associated protein RIF1 isoform 2 [Homo sapiens]
CA354956.p.om.7	3	0.16	0.07	0.09	2.28571	gb|AAI15150.1|	Smap1 protein [Danio rerio]
CA356974.p.om.7	27	0.48	0.21	0.27	2.28571	ref|NP_001117918.1|	glycogen synthase kinase binding protein [Oncorhynchus mykiss]_x0001_gb|AAM44075.1| guanylate-binding protein [Oncorhynchus mykiss]
CA357013.p.om.7	3	0.16	0.07	0.09	2.28571	ref|NP_570993.2|	frizzled homolog 8a [Danio rerio]_x0001_gb|AAD05435.1| frizzled 8a protein [Danio rerio]_x0001_gb|AAH56273.1| Frizzled homolog 8a [Danio rerio]_x0001_gb|AAH63227.1| Frizzled homolog 8a [Danio rerio]
CA360269.p.om.7	3	0.16	0.07	0.09	2.28571	gb|AAI04502.1|	MTPAP protein [Bos taurus]
CA360273.p.om.7	3	0.16	0.07	0.09	2.28571	gb|ACN10647.1|	Calponin-3 [Salmo salar]
CA364222.p.om.7	3	0.16	0.07	0.09	2.28571	ref|NP_690887.2|	potassium voltage-gated channel subfamily KQT member 3 [Mus musculus]
CA365537.p.om.7	3	0.16	0.07	0.09	2.28571	gb|DAA14354.1|	nidogen 1 [Bos taurus]
CA368033.p.om.7	6	0.16	0.07	0.09	2.28571	gb|ACG58868.1|	myeloid cell lineage chitinase [Oncorhynchus mykiss]
CA369481.p.om.7	3	0.16	0.07	0.09	2.28571	ref|NP_001025377.1|	anoctamin-10 [Danio rerio]_x0001_sp|Q4V8U5.1|ANO10_DANRE RecName: Full=Anoctamin-10; AltName: Full=Transmembrane protein 16K_x0001_gb|AAH97195.1| Zgc:114140 [Danio rerio]
CA372516.p.om.7	3	0.16	0.07	0.09	2.28571	gb|AAP06232.1|	similar to GenBank Accession Number AB073376 non-LTR retrotransposable element partially supported by GENSCAN in Oryzias latipes [Schistosoma japonicum]
CA374309.p.om.7	3	0.16	0.07	0.09	2.28571	ref|NM_001126388.1|	Danio rerio si:dkeyp-35b8.5 (si:dkeyp-35b8.5), mRNA
CF752618.p.om.7	3	0.16	0.07	0.09	2.28571	ref|NM_001177473.1|	Oryzias latipes ventricular myosin heavy chain (vmhc), mRNA_x0001_dbj|AB515306.1| Oryzias latipes vmhc mRNA for ventricular myosin heavy chain, complete cds
CR368980.p.om.7	6	0.32	0.14	0.18	2.28571	ref|NP_001134333.1|	Secretory carrier-associated membrane protein 4 [Salmo salar]_x0001_gb|ACI67090.1| Secretory carrier-associated membrane protein 4 [Salmo salar]
CR374394.p.om.7	3	0.16	0.07	0.09	2.28571	ref|NP_001134451.1|	CN153 protein [Salmo salar]_x0001_gb|ACI67579.1| C14orf153 precursor [Salmo salar]
CX029327.p.om.7	3	0.16	0.07	0.09	2.28571	ref|NP_001152802.1|	rho GTPase-activating protein 27 isoform b [Homo sapiens]_x0001_gb|AAI01392.3| ARHGAP27 protein [Homo sapiens]
CX030491.p.om.7	3	0.16	0.07	0.09	2.28571	ref|XP_001999730.1|	GI24682 [Drosophila mojavensis]_x0001_gb|EDW15191.1| GI24682 [Drosophila mojavensis]
CX030907.p.om.7	3	0.16	0.07	0.09	2.28571	gb|AAH55234.1|	AE binding protein 2 [Danio rerio]
CX033519.p.om.7	3	0.16	0.07	0.09	2.28571	ref|NP_001137312.1|	adenomatosis polyposis coli [Danio rerio]
CX144324.p.om.7	6	0.32	0.14	0.18	2.28571	ref|NP_001128476.1|	dnaJ homolog subfamily B member 5 isoform 2 [Homo sapiens]
CX146865.p.om.7	3	0.16	0.07	0.09	2.28571	ref|NP_001068579.1|	hepatocyte nuclear factor 4-gamma [Danio rerio]_x0001_gb|AAI24294.1| Hepatocyte nuclear factor 4, gamma [Danio rerio]_x0001_gb|AAI65580.1| Hnf4g protein [Danio rerio]
DQ218470.p.om.7	6	0.16	0.07	0.09	2.28571	ref|NP_001118039.1|	TNF superfamily member 14 [Oncorhynchus mykiss]_x0001_gb|ABC84585.1| TNF superfamily member 14 [Oncorhynchus mykiss]
DV199671.p.om.7	6	0.32	0.14	0.18	2.28571	ref|NP_001003882.1|	seryl-tRNA synthetase, cytoplasmic [Danio rerio]_x0001_gb|AAT68157.1| seryl-tRNA synthetase [Danio rerio]_x0001_gb|AAH81608.1| Seryl-tRNA synthetase [Danio rerio]_x0001_dbj|BAI44434.1| seryl-tRNA synthetase [Danio rerio]
Z48794.p.om.7	30	0.32	0.14	0.18	2.28571	dbj|BAC00871.1|	myosin heavy chain [Oncorhynchus keta]
CA369650.p.om.7	18	0.89	0.39	0.49	2.28205	ref|NP_001020585.1|	histidyl-tRNA synthetase, cytoplasmic [Rattus norvegicus]_x0001_gb|AAH97969.1| Histidyl-tRNA synthetase [Rattus norvegicus]_x0001_gb|EDL76319.1| dead end homolog 1 (zebrafish) [Rattus norvegicus]
CR371177.p.om.7	12	0.57	0.25	0.31	2.28	gb|ACI33808.1|	Vacuolar proton pump subunit E 1 [Salmo salar]
CU073778.p.om.7	142	4.01	1.76	2.25	2.27841	ref|NP_001139937.1|	ufm1-specific protease 2 [Salmo salar]_x0001_gb|ACM08768.1| Ufm1-specific protease 2 [Salmo salar]
BX311475.p.om.7	21	0.82	0.36	0.46	2.27778	ref|NP_001133442.1|	LanC-like protein 2 [Salmo salar]_x0001_gb|ACI33244.1| LanC-like protein 2 [Salmo salar]
BX857739.p.om.7	9	0.41	0.18	0.23	2.27778	gb|ACI69608.1|	Ubiquitin-like protein 4A [Salmo salar]
BX876219.p.om.7	9	0.41	0.18	0.23	2.27778	ref|NP_001134488.1|	Eukaryotic translation elongation factor 1 epsilon-1 [Salmo salar]_x0001_gb|ACI67723.1| Eukaryotic translation elongation factor 1 epsilon-1 [Salmo salar]
CX718539.p.om.7	3	0.41	0.18	0.23	2.27778	dbj|BAF45899.1|	ribosomal protein S11 [Solea senegalensis]
BX086498.p.om.7	21	0.66	0.29	0.37	2.27586	ref|NP_001008205.1|	UTP14, U3 small nucleolar ribonucleoprotein, homolog A [Xenopus (Silurana) tropicalis]_x0001_gb|AAH80963.1| UTP14, U3 small nucleolar ribonucleoprotein, homolog A [Xenopus (Silurana) tropicalis]
GE830695.p.om.7	18	0.66	0.29	0.37	2.27586	gb|ABO26645.1|	proteasome alpha type 2 [Haliotis discus discus]
BX076343.p.om.7	6	0.25	0.11	0.14	2.27273	ref|NP_001133849.1|	AIDB protein [Salmo salar]_x0001_gb|ACI34013.1| aidB [Salmo salar]
BX087831.p.om.7	6	0.25	0.11	0.14	2.27273	gb|ACO08898.1|	U3 small nucleolar RNA-interacting protein 2 [Osmerus mordax]
BX297611.p.om.7	6	0.25	0.11	0.14	2.27273	ref|NP_001108153.2|	cleavage and polyadenylation specificity factor subunit 1 [Danio rerio]
BX314386.p.om.7	6	0.25	0.11	0.14	2.27273	gb|ACD85807.1|	cellular nucleic acid-binding protein [Ctenopharyngodon idella]
BX884052.p.om.7	6	0.25	0.11	0.14	2.27273	ref|NP_958473.1|	tyrosyl-tRNA synthetase, cytoplasmic [Danio rerio]_x0001_gb|AAQ97863.1| tyrosyl-tRNA synthetase [Danio rerio]_x0001_emb|CAK04282.1| tyrosyl-tRNA synthetase [Danio rerio]
BX910053.p.om.7	6	0.25	0.11	0.14	2.27273	ref|NP_001134668.1|	Twisted gastrulation protein homolog 1-A [Salmo salar]_x0001_gb|ACI68427.1| Twisted gastrulation protein homolog 1-A precursor [Salmo salar]
CA382036.p.om.7	3	0.25	0.11	0.14	2.27273	dbj|BAA96304.1|	polycomb-group protein [Rattus norvegicus]
CR943714.p.om.7	3	0.25	0.11	0.14	2.27273	gb|ACI69845.1|	60S ribosomal protein L22 [Salmo salar]
CA369147.p.om.7	9	0.59	0.26	0.33	2.26923	ref|NP_001167054.1|	nuclear factor NF-kappa-B p100 subunit [Salmo salar]_x0001_gb|ACN10697.1| Nuclear factor NF-kappa-B p100 subunit [Salmo salar]
BX301520.p.om.7	9	0.34	0.15	0.19	2.26667	ref|NP_001133823.1|	exocyst complex component 7 [Salmo salar]_x0001_gb|ACI33961.1| Exocyst complex component 7 [Salmo salar]
BX304964.p.om.7	18	0.68	0.3	0.38	2.26667	gb|ACN60273.1|	Exocyst complex component 2 [Salmo salar]
BX859465.p.om.7	15	0.68	0.3	0.38	2.26667	ref|NP_001014821.1|	angiopoietin-like 6 [Danio rerio]_x0001_dbj|BAD86840.1| angiopoietin-like 6 [Danio rerio]
CA343437.p.om.7	15	0.68	0.3	0.38	2.26667	gb|ACO09553.1|	Tripartite motif-containing protein 35 [Osmerus mordax]
DV199098.p.om.7	6	0.34	0.15	0.19	2.26667	gb|AAI53499.1|	P4ha1 protein [Danio rerio]
BX302516.p.om.7	18	0.77	0.34	0.43	2.26471	gb|ABQ59647.1|	PSMB10 [Salmo salar]_x0001_gb|ACI68687.1| Proteasome subunit beta type-7 precursor [Salmo salar]_x0001_gb|ACN10130.1| Proteasome subunit beta type-7 precursor [Salmo salar]_x0001_gb|ACN12481.1| Proteasome subunit beta type-7 precursor [Salmo salar]_x0001_gb|ACY30373.1| PSMB10 [Salmo salar]
BX912109.p.om.7	6	0.43	0.19	0.24	2.26316	ref|NP_001158554.1|	U3 small nucleolar ribonucleoprotein protein IMP3 [Oncorhynchus mykiss]_x0001_gb|ACO08252.1| U3 small nucleolar ribonucleoprotein protein IMP3 [Oncorhynchus mykiss]
CR369521.p.om.7	15	0.86	0.38	0.48	2.26316	ref|NM_001190270.1|	Bos taurus mitofusin 2 (MFN2), nuclear gene encoding mitochondrial protein, transcript variant 2, mRNA_x0001_emb|FN868564.1| Bos taurus mRNA for mitofusin 2 transcript variant 2 (MFN2 gene)
CA378345.p.om.7	9	2.24	0.99	1.24	2.26263	gb|ACN10151.1|	40S ribosomal protein SA [Salmo salar]_x0001_gb|ACN12502.1| 40S ribosomal protein SA [Salmo salar]
CR363181.p.om.7	21	1.04	0.46	0.58	2.26087	gb|ACH70927.1|	eukaryotic translation initiation factor 5A -1 [Salmo salar]_x0001_gb|ACI34012.1| Eukaryotic translation initiation factor 5A-1 [Salmo salar]
CU068874.p.om.7	12	0.52	0.23	0.29	2.26087	gb|AC200347.8|	Macaca mulatta BAC CH250-221H10 (Children's Hospital Oakland Research Institute Rhesus macaque Adult Male BAC Library) complete sequence
BX305487.p.om.7	15	0.61	0.27	0.34	2.25926	gb|AAI25966.1|	Aof2 protein [Danio rerio]
BX856936.p.om.7	12	0.61	0.27	0.34	2.25926	gb|EAW63816.1|	myotubularin related protein 7 [Homo sapiens]
BX860949.p.om.7	15	0.61	0.27	0.34	2.25926	ref|NP_001140120.1|	Zinc finger protein 391 [Salmo salar]_x0001_gb|ACM08258.1| Zinc finger protein 391 [Salmo salar]
CA366365.p.om.7	12	0.61	0.27	0.34	2.25926	gb|AAM94022.1|	regulator of G protein signaling 3 [Gallus gallus]
CA378679.p.om.7	12	0.61	0.27	0.34	2.25926	gb|DAA22711.1|	brefeldin A-inhibited guanine nucleotide-exchange protein 1 [Bos taurus]
CX153465.p.om.7	24	1.31	0.58	0.73	2.25862	ref|NP_001167183.1|	Phosphatidylinositol-binding clathrin assembly protein [Salmo salar]_x0001_gb|ACN11017.1| Phosphatidylinositol-binding clathrin assembly protein [Salmo salar]
CA378235.p.om.7	12	0.7	0.31	0.39	2.25806	ref|NP_001006100.1|	CDK-activating kinase assembly factor MAT1 [Danio rerio]_x0001_gb|AAH83216.1| Menage a trois homolog 1 [Danio rerio]_x0001_gb|AAI64088.1| Mnat1 protein [Danio rerio]
CU074155.p.om.7	30	1.49	0.66	0.83	2.25758	ref|NP_001170926.1|	zinc finger protein Eos [Danio rerio]_x0001_tpe|CAQ76705.1| TPA: Eos protein [Danio rerio]
BX299771.p.om.7	21	0.79	0.35	0.44	2.25714	ref|NP_001167361.1|	Uridine 5-monophosphate synthase [Salmo salar]_x0001_gb|ACN11469.1| Uridine 5-monophosphate synthase [Salmo salar]
CA366798.p.om.7	15	0.88	0.39	0.49	2.25641	emb|CU687463.1|	Synthetic construct Homo sapiens gateway clone IMAGE:100023176 3' read INTS5 mRNA
BX307505.p.om.7	12	0.97	0.43	0.54	2.25581	ref|NP_001158588.1|	NADH dehydrogenase iron-sulfur protein 5 [Oncorhynchus mykiss]_x0001_gb|ACO08378.1| NADH dehydrogenase iron-sulfur protein 5 [Oncorhynchus mykiss]
BX303678.p.om.7	30	1.24	0.55	0.69	2.25455	ref|NP_997734.1|	DNA replication licensing factor MCM7 [Danio rerio]_x0001_gb|AAH45497.1| MCM7 minichromosome maintenance deficient 7 (S. cerevisiae) [Danio rerio]_x0001_gb|AAH65669.1| MCM7 minichromosome maintenance deficient 7 (S. cerevisiae) [Danio rerio]
CX723221.p.om.7	33	1.78	0.79	0.99	2.25316	ref|NP_989595.1|	suppressor of fused homolog [Gallus gallus]_x0001_gb|AAL93299.1|AF487888_1 suppressor of fused [Gallus gallus]
CA369689.p.om.7	6	1.87	0.83	1.04	2.25301	dbj|BAB20265.1|	mono ATP-binding cassette protein [Homo sapiens]
GE840724.p.om.7	57	2.5	1.11	1.39	2.25225	gb|AAH44522.1|	Prmt1 protein [Danio rerio]
BX078556.p.om.7	60	2.7	1.2	1.5	2.25	gb|EAW51211.1|	slingshot homolog 2 (Drosophila), isoform CRA_c [Homo sapiens]
BX301539.p.om.7	6	0.27	0.12	0.15	2.25	gb|AAK30301.1|AF289866_1	haploid germ cell-specific nuclear protein kinase [Mus musculus]_x0001_gb|AAI13149.1| Germ cell-specific gene 2 [Mus musculus]_x0001_emb|CAQ51890.1| germ cell-specific gene 2 [Mus musculus]
BX304215.p.om.7	6	0.27	0.12	0.15	2.25	gb|ACI33808.1|	Vacuolar proton pump subunit E 1 [Salmo salar]
BX864664.p.om.7	6	0.27	0.12	0.15	2.25	gb|ACI69749.1|	Dehydrogenase/reductase SDR family member 13 precursor [Salmo salar]
BX870276.p.om.7	12	0.54	0.24	0.3	2.25	gb|AAH05650.1|	Phosphatidylinositol glycan anchor biosynthesis, class M [Mus musculus]
CA370287.p.om.7	12	0.54	0.24	0.3	2.25	dbj|AB383850.1|	Synthetic construct DNA, clone: pF1KSDA0326, Homo sapiens ZNF629 gene for zinc finger protein 629, complete cds, without stop codon, in Flexi system
CR372014.p.om.7	6	0.27	0.12	0.15	2.25	gb|AAM43813.1|	N-acylsphingosine amidohydrolase [Takifugu rubripes]
CR943099.p.om.7	3	0.27	0.12	0.15	2.25	gb|ACB59380.1|	progranulin type I [Paralichthys olivaceus]_x0001_gb|ACB59381.1| progranulin type II [Paralichthys olivaceus]_x0001_gb|ACB59382.1| progranulin [Paralichthys olivaceus]_x0001_gb|ACB59383.1| progranulin [Paralichthys olivaceus]
DV196060.p.om.7	9	1.62	0.72	0.9	2.25	ref|NP_001133592.1|	Leukotriene A-4 hydrolase [Salmo salar]_x0001_gb|ACI33534.1| Leukotriene A-4 hydrolase [Salmo salar]
BX074399.p.om.7	9	0.36	0.16	0.2	2.25	emb|CR760951.2|	Xenopus tropicalis finished cDNA, clone TEgg028c08
BX297363.p.om.7	15	0.63	0.28	0.35	2.25	ref|NP_001167262.1|	Cell differentiation protein RCD1 homolog [Salmo salar]_x0001_gb|ACN11226.1| Cell differentiation protein RCD1 homolog [Salmo salar]
BX307193.p.om.7	6	0.18	0.08	0.1	2.25	gb|ACI68030.1|	Triosephosphate isomerase [Salmo salar]_x0001_gb|ACN10206.1| Triosephosphate isomerase [Salmo salar]_x0001_gb|ACN12560.1| Triosephosphate isomerase [Salmo salar]
BX311868.p.om.7	3	0.18	0.08	0.1	2.25	ref|NP_001025408.1|	mitochondrial carnitine/acylcarnitine carrier protein CACL [Danio rerio]_x0001_gb|AAH97154.1| Solute carrier family 25, member 29 [Danio rerio]
BX319127.p.om.7	6	0.18	0.08	0.1	2.25	ref|NP_571968.1|	homeobox protein Meis1 [Danio rerio]_x0001_gb|AAK55553.1|AF375871_1 transcription factor Meis1.1 [Danio rerio]_x0001_gb|AAH60891.1| Myeloid ecotropic viral integration 1 [Danio rerio]_x0001_emb|CAX12564.1| myeloid ecotropic viral integration 1 [Danio rerio]_x0001_emb|CAX13989.1| myeloid ecotropic viral integration 1 [Danio rerio]
BX321266.p.om.7	9	0.36	0.16	0.2	2.25	ref|NP_001134051.1|	Ubiquitin-conjugating enzyme E2 variant 2 [Salmo salar]_x0001_gb|ACI66042.1| Ubiquitin-conjugating enzyme E2 variant 2 [Salmo salar]
BX869448.p.om.7	9	0.36	0.16	0.2	2.25	gb|ACI67528.1|	NADH dehydrogenase 1 alpha subcomplex subunit 5 [Salmo salar]_x0001_gb|ACI68326.1| NADH dehydrogenase 1 alpha subcomplex subunit 5 [Salmo salar]_x0001_gb|ACI68847.1| NADH dehydrogenase 1 alpha subcomplex subunit 5 [Salmo salar]_x0001_gb|ACM09783.1| NADH dehydrogenase 1 alpha subcomplex subunit 5 [Salmo salar]
BX883438.p.om.7	3	0.09	0.04	0.05	2.25	ref|NP_001134220.1|	Leukotriene B4 receptor 1 [Salmo salar]_x0001_gb|ACI66663.1| Leukotriene B4 receptor 1 [Salmo salar]
CA341918.p.om.7	3	0.09	0.04	0.05	2.25	ref|NP_001117858.1|	protein AMBP precursor [Oncorhynchus mykiss]_x0001_emb|CAD66667.1| alpha-1-microglobulin/bikunin precursor [Oncorhynchus mykiss]
CA342923.p.om.7	3	0.09	0.04	0.05	2.25	gb|EDL02501.1|	valosin containing protein, isoform CRA_b [Mus musculus]
CA346266.p.om.7	3	0.09	0.04	0.05	2.25	ref|NP_001135201.1|	Carboxypeptidase N catalytic chain [Salmo salar]_x0001_gb|ACI33212.1| Carboxypeptidase N catalytic chain precursor [Salmo salar]
CA350243.p.om.7	3	0.09	0.04	0.05	2.25	gb|AAI55282.1|	Elovl7a protein [Danio rerio]
CA355846.p.om.7	6	0.36	0.16	0.2	2.25	ref|NP_955922.1|	LAG1 longevity assurance homolog 5 [Danio rerio]_x0001_gb|AAH53143.1| LAG1 homolog, ceramide synthase 5 (S. cerevisiae) [Danio rerio]
CA358127.p.om.7	3	0.18	0.08	0.1	2.25	ref|NP_001158883.1|	Neurofilament medium polypeptide [Salmo salar]_x0001_gb|ACN10674.1| Neurofilament medium polypeptide [Salmo salar]
CA359368.p.om.7	3	0.09	0.04	0.05	2.25	ref|NP_570993.2|	frizzled homolog 8a [Danio rerio]_x0001_gb|AAD05435.1| frizzled 8a protein [Danio rerio]_x0001_gb|AAH56273.1| Frizzled homolog 8a [Danio rerio]_x0001_gb|AAH63227.1| Frizzled homolog 8a [Danio rerio]
CA367852.p.om.7	9	0.09	0.04	0.05	2.25	gb|ACN58734.1|	Ras GTPase-activating-like protein IQGAP1 [Salmo salar]
CA370161.p.om.7	3	0.36	0.16	0.2	2.25	gb|ACO07950.1|	NADH dehydrogenase iron-sulfur protein 7, mitochondrial precursor [Oncorhynchus mykiss]
CA381687.p.om.7	6	0.18	0.08	0.1	2.25	gb|AAI62670.1|	Zfpm2a protein [Danio rerio]
CA384278.p.om.7	3	0.09	0.04	0.05	2.25	gb|ACN58636.1|	Mitogen-activated protein kinase kinase kinase kinase 2 [Salmo salar]
CA387628.p.om.7	3	0.09	0.04	0.05	2.25	ref|NP_571018.1|	frizzled-related protein [Danio rerio]_x0001_gb|AAD22462.1|AF116853_1 fzb-1 [Danio rerio]_x0001_emb|CAQ13348.1| frizzled-related protein [Danio rerio]_x0001_gb|AAI62928.1| Frizzled-related protein [Danio rerio]_x0001_gb|AAI62950.1| Frizzled-related protein [Danio rerio]
CN211087.p.om.7	3	0.18	0.08	0.1	2.25	ref|NP_001158696.1|	Nucleoside diphosphate kinase B [Oncorhynchus mykiss]_x0001_gb|ACO08811.1| Nucleoside diphosphate kinase B [Oncorhynchus mykiss]
CR372314.p.om.7	39	1.71	0.76	0.95	2.25	gb|EAW92922.1|	replication factor C (activator 1) 1, 145kDa, isoform CRA_a [Homo sapiens]
CT566302.p.om.7	9	0.36	0.16	0.2	2.25	ref|NP_001133436.1|	low density lipoprotein receptor adapter protein 1-B [Salmo salar]_x0001_gb|ACI33229.1| Low density lipoprotein receptor adapter protein 1-B [Salmo salar]
CU063315.p.om.7	6	0.18	0.08	0.1	2.25	ref|NP_001108210.1|	deoxyribonuclease-2-alpha [Danio rerio]_x0001_gb|AAI59269.1| Dnase2 protein [Danio rerio]
CU064881.p.om.7	3	0.09	0.04	0.05	2.25	ref|NP_001134742.1|	U1 small nuclear ribonucleoprotein A [Salmo salar]_x0001_gb|ACI68664.1| U1 small nuclear ribonucleoprotein A [Salmo salar]
CX028421.p.om.7	3	0.18	0.08	0.1	2.25	ref|NP_001135198.1|	homeobox protein EMX2 [Salmo salar]_x0001_gb|ACI33177.1| Homeobox protein EMX2 [Salmo salar]_x0001_gb|ACN11026.1| Homeobox protein EMX2 [Salmo salar]
CX037959.p.om.7	3	0.18	0.08	0.1	2.25	ref|NP_001134009.1|	SH3 domain-containing kinase-binding protein 1 [Salmo salar]_x0001_gb|ACI34303.1| SH3 domain-containing kinase-binding protein 1 [Salmo salar]
CX066354.p.om.7	3	0.18	0.08	0.1	2.25	gb|AAS78488.1|	LacZ alpha & ccdB lethal fusion protein [Cloning vector pZero++ Amp]_x0001_gb|AAS78491.1| LacZ alpha & ccdB lethal fusion protein [Cloning vector pZero++ Kan]
CX123846.p.om.7	3	0.18	0.08	0.1	2.25	ref|YP_003498798.1|	Tyrosine-protein kinase etk [Escherichia coli O55:H7 str. CB9615]_x0001_gb|ADD55814.1| Tyrosine-protein kinase etk [Escherichia coli O55:H7 str. CB9615]
CX153438.p.om.7	3	0.18	0.08	0.1	2.25	gb|ABD67513.1|	microsomal glutathione S-transferase 1 [Cyprinus carpio]
CX252739.p.om.7	9	0.63	0.28	0.35	2.25	gb|AAH56211.1|	Platelet-activating factor acetylhydrolase, isoform 1b, alpha2 subunit [Mus musculus]
CX724654.p.om.7	3	0.18	0.08	0.1	2.25	gb|GU324549.1|	Salmo salar polyunsaturated fatty acid elongase (elovl5b) gene, exons 1 through 5 and partial cds
DV196961.p.om.7	3	0.18	0.08	0.1	2.25	gb|ACO09457.1|	Adhesion-regulating molecule 1 precursor [Osmerus mordax]
CA384193.p.om.7	18	1.19	0.53	0.66	2.24528	ref|NP_001118158.1|	cystathionine-beta-synthase [Oncorhynchus mykiss]_x0001_gb|ABY40473.1| cystathionine-beta-synthase [Oncorhynchus mykiss]
BX305758.p.om.7	39	1.75	0.78	0.97	2.24359	ref|NP_001135286.1|	Ubiquitin carboxyl-terminal hydrolase 5 [Salmo salar]_x0001_gb|ACI34254.1| Ubiquitin carboxyl-terminal hydrolase 5 [Salmo salar]
BX301471.p.om.7	30	1.3	0.58	0.72	2.24138	gb|BC025442.1|	Mus musculus xylulokinase homolog (H. influenzae), mRNA (cDNA clone IMAGE:5043428), partial cds
BX887642.p.om.7	15	0.65	0.29	0.36	2.24138	gb|ABW77502.1|	male-specific lethal-1-like protein [Salmo salar]
CA349782.p.om.7	9	1.95	0.87	1.09	2.24138	ref|NP_001167412.1|	wee1-like protein kinase [Salmo salar]_x0001_gb|ACN11033.1| Wee1-like protein kinase [Salmo salar]
BX074736.p.om.7	9	0.56	0.25	0.31	2.24	gb|ACI70100.1|	Hydroxyacyl-coenzyme A dehydrogenase, mitochondrial precursor [Salmo salar]
CA366037.p.om.7	3	0.56	0.25	0.31	2.24	ref|NP_998250.1|	2-hydroxyacyl-CoA lyase 1 [Danio rerio]_x0001_gb|AAH66580.1| 2-hydroxyacyl-CoA lyase 1 [Danio rerio]
CX125388.p.om.7	9	1.03	0.46	0.57	2.23913	gb|ACN09842.1|	Splicing factor U2AF 35 kDa subunit [Salmo salar]_x0001_gb|ACN12189.1| Splicing factor U2AF 35 kDa subunit [Salmo salar]
BX305300.p.om.7	12	0.47	0.21	0.26	2.2381	gb|BC144335.1|	Homo sapiens cDNA clone IMAGE:9052855, containing frame-shift errors
CB490368.p.om.7	21	0.94	0.42	0.52	2.2381	gb|DAA26011.1|	peptide chain release factor 1-like, mitochondrial precursor [Bos taurus]
CB493047.p.om.7	12	0.47	0.21	0.26	2.2381	gb|ACI67144.1|	Small ubiquitin-related modifier 2 precursor [Salmo salar]
CT572555.p.om.7	3	0.47	0.21	0.26	2.2381	ref|NP_001100628.1|	bromodomain adjacent to zinc finger domain, 2A [Rattus norvegicus]_x0001_gb|EDL84888.1| bromodomain adjacent to zinc finger domain, 2A (predicted) [Rattus norvegicus]
CU066586.p.om.7	18	0.47	0.21	0.26	2.2381	gb|ABZ92252.1|	zinc finger protein 79 [synthetic construct]
CX137054.p.om.7	9	0.47	0.21	0.26	2.2381	ref|NP_001133871.1|	Cathepsin K [Salmo salar]_x0001_gb|ACI34056.1| Cathepsin K precursor [Salmo salar]_x0001_gb|ACN10384.1| Cathepsin K precursor [Salmo salar]_x0001_gb|ACN12746.1| Cathepsin K precursor [Salmo salar]
CX351316.p.om.7	12	0.85	0.38	0.47	2.23684	gb|ADH21441.1|	excitatory amino acid transporter SLC1A2a [Danio rerio]
CX040492.p.om.7	6	0.38	0.17	0.21	2.23529	emb|CAM21130.1|	novel KRAB box and zinc finger, C2H2 type domain containing protein [Mus musculus]
BX086080.p.om.7	6	0.29	0.13	0.16	2.23077	gb|ACO13480.1|	Exosome complex exonuclease RRP41 [Esox lucius]
BX863656.p.om.7	12	0.29	0.13	0.16	2.23077	gb|AAN10161.1|	IHABP [Takifugu rubripes]
BX865937.p.om.7	12	0.58	0.26	0.32	2.23077	ref|XP_002030203.1|	GM25309 [Drosophila sechellia]_x0001_gb|EDW41189.1| GM25309 [Drosophila sechellia]
CA348260.p.om.7	6	0.29	0.13	0.16	2.23077	emb|CAN88031.1|	LIM homeobox 8 [Danio rerio]
CU075243.p.om.7	6	0.29	0.13	0.16	2.23077	gb|AAV32964.1|	cathepsin S-like [Oncorhynchus mykiss]
CX036301.p.om.7	6	0.29	0.13	0.16	2.23077	ref|NP_001158870.1|	thyrotrophic embryonic factor [Salmo salar]_x0001_gb|ACN10652.1| Transcription factor VBP [Salmo salar]
BX080707.p.om.7	18	0.49	0.22	0.27	2.22727	gb|ABV23487.1|	protein phosphatase 2 regulatory subunit B'' beta [Carassius auratus]
CB490366.p.om.7	6	0.49	0.22	0.27	2.22727	gb|ACO14171.1|	Ubiquitin-conjugating enzyme E2 C [Esox lucius]
CX041356.p.om.7	9	0.49	0.22	0.27	2.22727	emb|CAF90589.1|	unnamed protein product [Tetraodon nigroviridis]
CN211033.p.om.7	9	1.18	0.53	0.66	2.22642	ref|NP_001158637.1|	60S ribosomal protein L11 [Oncorhynchus mykiss]_x0001_gb|ACO08586.1| 60S ribosomal protein L11 [Oncorhynchus mykiss]
CR375764.p.om.7	15	0.89	0.4	0.5	2.225	gb|AAI71627.1|	Cherp protein [Danio rerio]
CB496476.p.om.7	18	1.09	0.49	0.61	2.22449	dbj|BAA25253.1|	unnamed protein product [Canis lupus familiaris]
BX080208.p.om.7	3	0.2	0.09	0.11	2.22222	gb|ABW77485.1|	tubulin tyrosine ligase-like family member 6a [Salmo salar]
BX859432.p.om.7	9	0.4	0.18	0.22	2.22222	gb|ADC93707.1|	peptidoglycan recognition protein L1 [Sebastes schlegelii]
CA343227.p.om.7	3	0.2	0.09	0.11	2.22222	ref|NP_001006741.1|	kinesin family member 4A [Xenopus (Silurana) tropicalis]_x0001_gb|AAH75502.1| kinesin family member 4A [Xenopus (Silurana) tropicalis]_x0001_emb|CAJ81396.1| kinesin family member 4A [Xenopus (Silurana) tropicalis]
CA364555.p.om.7	3	0.2	0.09	0.11	2.22222	ref|NP_001133481.1|	Mediator of RNA polymerase II transcription subunit 6 [Salmo salar]_x0001_gb|ACI33322.1| Mediator of RNA polymerase II transcription subunit 6 [Salmo salar]_x0001_gb|ACI67651.1| Mediator of RNA polymerase II transcription subunit 6 [Salmo salar]
CA369711.p.om.7	3	0.2	0.09	0.11	2.22222	ref|NP_001133176.1|	fructose-1,6-bisphosphatase isozyme 2 [Salmo salar]_x0001_gb|ACH70893.1| fructose-1,6-bisphosphatase [Salmo salar]
CU063441.p.om.7	6	0.2	0.09	0.11	2.22222	gb|EDL90176.1|	mediator of RNA polymerase II transcription, subunit 8 homolog (yeast) (predicted), isoform CRA_c [Rattus norvegicus]_x0001_gb|EDL90177.1| mediator of RNA polymerase II transcription, subunit 8 homolog (yeast) (predicted), isoform CRA_d [Rattus norvegicus]
CX251060.p.om.7	3	0.2	0.09	0.11	2.22222	gb|ACO14163.1|	Derlin-2 [Esox lucius]
CX252476.p.om.7	3	0.2	0.09	0.11	2.22222	gb|EDL79224.1|	developmentally regulated RNA-binding protein 1 [Rattus norvegicus]
CX255554.p.om.7	3	0.2	0.09	0.11	2.22222	ref|NP_001139851.1|	Thioredoxin domain-containing protein 12 [Salmo salar]_x0001_gb|ACM08336.1| Thioredoxin domain-containing protein 12 precursor [Salmo salar]
BX306517.p.om.7	18	0.82	0.37	0.46	2.21622	ref|NP_001133995.1|	CREG1 protein [Salmo salar]_x0001_gb|ACI34277.1| CREG1 precursor [Salmo salar]
CA366154.p.om.7	9	0.82	0.37	0.46	2.21622	gb|ACO07705.1|	Flavin reductase [Oncorhynchus mykiss]
CX028776.p.om.7	15	0.82	0.37	0.46	2.21622	ref|NP_001167154.1|	FAM29A [Salmo salar]_x0001_gb|ACN10950.1| FAM29A [Salmo salar]
GE831316.p.om.7	86	4.83	2.18	2.65	2.2156	gb|ACI67619.1|	Mitochondrial import inner membrane translocase subunit TIM14 [Salmo salar]_x0001_gb|ACI69103.1| Mitochondrial import inner membrane translocase subunit TIM14 [Salmo salar]_x0001_gb|ACO10892.1| Mitochondrial import inner membrane translocase subunit TIM14 [Caligus rogercresseyi]
BX072909.p.om.7	6	0.31	0.14	0.17	2.21429	gb|ACN60348.1|	DNA [Salmo salar]
BX308984.p.om.7	6	0.31	0.14	0.17	2.21429	ref|NP_001107266.1|	carcinoembryonic antigen-related cell adhesion molecule 1 [Danio rerio]_x0001_emb|CAP71942.1| ceacam1 [Danio rerio]
CA382570.p.om.7	6	0.31	0.14	0.17	2.21429	ref|NP_001135120.1|	Mitogen-activated protein kinase 13 [Salmo salar]_x0001_gb|ACI34085.1| Mitogen-activated protein kinase 13 [Salmo salar]
CX031707.p.om.7	6	0.31	0.14	0.17	2.21429	gb|ACN11421.1|	Heterogeneous nuclear ribonucleoprotein R [Salmo salar]
CX034717.p.om.7	6	0.31	0.14	0.17	2.21429	gb|ACM09808.1|	RNA-binding protein 4B [Salmo salar]
GE826977.p.om.7	15	0.62	0.28	0.35	2.21429	gb|ACI67883.1|	Proteasome subunit alpha type-1 [Salmo salar]_x0001_gb|ACN10106.1| Proteasome subunit alpha type-1 [Salmo salar]_x0001_gb|ACN12455.1| Proteasome subunit alpha type-1 [Salmo salar]_x0001_gb|ACO08165.1| Proteasome subunit alpha type 1 [Oncorhynchus mykiss]
CA382085.p.om.7	225	5.49	2.48	3	2.21371	ref|NP_001140115.1|	Negative elongation factor E [Salmo salar]_x0001_gb|ACM09810.1| Negative elongation factor E [Salmo salar]
BX317548.p.om.7	9	0.42	0.19	0.23	2.21053	gb|ACI66878.1|	28S ribosomal protein S18b, mitochondrial precursor [Salmo salar]_x0001_gb|ACI69777.1| 28S ribosomal protein S18b, mitochondrial precursor [Salmo salar]
BX866473.p.om.7	6	0.42	0.19	0.23	2.21053	ref|NP_001152809.1|	checkpoint kinase 2 [Oncorhynchus mykiss]_x0001_gb|ABS87591.1| checkpoint kinase 2 [Oncorhynchus mykiss]
BX874487.p.om.7	9	0.42	0.19	0.23	2.21053	ref|NP_001158805.1|	Anaphase-promoting complex subunit 5 [Salmo salar]_x0001_gb|ACN10505.1| Anaphase-promoting complex subunit 5 [Salmo salar]
CA361079.p.om.7	9	0.42	0.19	0.23	2.21053	ref|NP_001134643.1|	Glia maturation factor gamma [Salmo salar]_x0001_gb|ACI68320.1| Glia maturation factor gamma [Salmo salar]_x0001_gb|ACI69038.1| Glia maturation factor gamma [Salmo salar]
CT568195.p.om.7	9	0.42	0.19	0.23	2.21053	gb|ACO07857.1|	Cathepsin Z precursor [Oncorhynchus mykiss]
CU074538.p.om.7	9	0.42	0.19	0.23	2.21053	gb|ACM08861.1|	Dehydrogenase/reductase SDR family member 7B [Salmo salar]
CX254306.p.om.7	157	9.35	4.23	5.12	2.2104	ref|NP_001154156.1|	Zinc-binding alcohol dehydrogenase domain-containing protein 1 [Oncorhynchus mykiss]_x0001_gb|ACO08070.1| Zinc-binding alcohol dehydrogenase domain-containing protein 1 [Oncorhynchus mykiss]
CA345761.p.om.7	3	0.53	0.24	0.3	2.20833	gb|AAH92169.1|	Pik3c3 protein [Danio rerio]_x0001_gb|AAI64467.1| Pik3c3 protein [Danio rerio]
BX303731.p.om.7	15	0.64	0.29	0.36	2.2069	gb|AAH44361.1|	Rnu3ip2 protein [Danio rerio]
BX298639.p.om.7	109	2.73	1.24	1.48	2.20161	gb|AAI39604.1|	Prpf3 protein [Danio rerio]
BX880319.p.om.7	6	0.33	0.15	0.18	2.2	ref|NP_001134304.1|	Exosome complex exonuclease RRP41 [Salmo salar]_x0001_gb|ACI66983.1| Exosome complex exonuclease RRP41 [Salmo salar]
CB493697.p.om.7	6	0.33	0.15	0.19	2.2	gb|ABP57106.1|	CUG-BP and ETR-3-like factor 4 isoform 2 [Gallus gallus]
AJ130844.p.om.7	6	0.22	0.1	0.12	2.2	emb|CAX14734.1|	solute carrier family 8 (sodium-calcium exchanger), member 3 [Danio rerio]_x0001_emb|CAX13700.1| solute carrier family 8 (sodium-calcium exchanger), member 3 [Danio rerio]
BX074286.p.om.7	3	0.11	0.05	0.06	2.2	gb|DAA28457.1|	carboxypeptidase Z [Bos taurus]
BX083756.p.om.7	3	0.11	0.05	0.06	2.2	gb|ACO08876.1|	Chemokine receptor-like 1 [Osmerus mordax]
BX299060.p.om.7	3	0.11	0.05	0.06	2.2	gb|ACI70051.1|	Vacuolar proton pump subunit G 1 [Salmo salar]
BX299196.p.om.7	3	0.11	0.05	0.06	2.2	gb|ACE80200.1|	plasma membrane calcium ATPase 1b [Xenopus laevis]
BX303531.p.om.7	3	0.11	0.05	0.06	2.2	ref|NP_001167148.1|	CDK5 regulatory subunit-associated protein 1-like 1 [Salmo salar]_x0001_gb|ACN10940.1| CDK5 regulatory subunit-associated protein 1-like 1 [Salmo salar]
BX305669.p.om.7	3	0.11	0.05	0.06	2.2	gb|ACM09177.1|	Elongation factor 1-delta [Salmo salar]
BX870572.p.om.7	3	0.11	0.05	0.06	2.2	ref|NP_038912.3|	chondroitin sulfate proteoglycan 5 isoform a [Mus musculus]
BX872270.p.om.7	3	0.11	0.05	0.06	2.2	ref|NP_001134136.1|	hairy and enhancer of split 5 [Salmo salar]_x0001_gb|ACI66330.1| Transcription factor HES-5 [Salmo salar]
BX881137.p.om.7	3	0.11	0.05	0.06	2.2	ref|NP_001135100.1|	zinc finger, AN1-type domain 5b [Salmo salar]_x0001_gb|ACH70888.1| zinc finger AN1-type domain 5b [Salmo salar]_x0001_gb|ACM08412.1| AN1-type zinc finger protein 5 [Salmo salar]
BX885114.p.om.7	3	0.11	0.05	0.06	2.2	gb|EDL16584.1|	nucleoporin 98, isoform CRA_c [Mus musculus]
BX888756.p.om.7	3	0.11	0.05	0.06	2.2	gb|AAI39849.1|	Hcfc1a protein [Danio rerio]_x0001_gb|AAI42545.1| Hcfc1a protein [Danio rerio]
BX889682.p.om.7	3	0.11	0.05	0.06	2.2	pdb|1IG3|A	Chain A, Mouse Thiamin Pyrophosphokinase Complexed With Thiamin_x0001_pdb|1IG3|B Chain B, Mouse Thiamin Pyrophosphokinase Complexed With Thiamin_x0001_pdb|2F17|A Chain A, Mouse Thiamin Pyrophosphokinase In A Ternary Complex With Pyrithiamin Pyrophosphate And Amp At 2.5 Angstrom_x0001_pdb|2F17|B Chain B, Mouse Thiamin Pyrophosphokinase In A Ternary Complex With Pyrithiamin Pyrophosphate And Amp At…
BX909275.p.om.7	3	0.11	0.05	0.06	2.2	dbj|BAB47142.1|	phospholipase A2 [Pagrus major]
CA343868.p.om.7	3	0.11	0.05	0.06	2.2	ref|NP_001131138.1|	periplakin [Danio rerio]
CA345488.p.om.7	9	0.11	0.05	0.06	2.2	emb|CAA57449.1|	apolipoprotein B [Salmo salar]
CA358521.p.om.7	3	0.22	0.1	0.12	2.2	ref|NP_001154812.1|	myomesin 1a [Danio rerio]
CA358602.p.om.7	9	0.44	0.2	0.24	2.2	gb|ACN58736.1|	Superkiller viralicidic activity 2-like 2 [Salmo salar]
CA382376.p.om.7	3	0.11	0.05	0.06	2.2	dbj|BAD92976.1|	Inositol 1,4,5-trisphosphate receptor type 3 variant [Homo sapiens]
CB485918.p.om.7	3	0.22	0.1	0.12	2.2	ref|NP_001133255.1|	aldehyde dehydrogenase family 7 member A1 homolog [Salmo salar]_x0001_gb|ACI32910.1| aldehyde dehydrogenase family 7 member A1 homolog [Salmo salar]
DV191390.p.om.7	3	0.11	0.05	0.06	2.2	gb|ACN60270.1|	Leucine-rich repeat-containing protein 47 [Salmo salar]
GE832537.p.om.7	3	0.11	0.05	0.06	2.2	emb|CAF25492.1|	CD97 antigen transcript variant [Bos taurus]
GE837858.p.om.7	3	0.11	0.05	0.06	2.2	ref|NP_001134563.1|	Alpha-aspartyl dipeptidase [Salmo salar]_x0001_gb|ACI68014.1| Alpha-aspartyl dipeptidase [Salmo salar]_x0001_gb|ACI69837.1| Alpha-aspartyl dipeptidase [Salmo salar]
BX879777.p.om.7	50	1.95	0.89	1.06	2.19101	gb|ACH71007.1|	ribosomal protein S27-4 [Salmo salar]_x0001_gb|ACI69998.1| 40S ribosomal protein S27 [Salmo salar]_x0001_gb|ACO07503.1| 40S ribosomal protein S27 [Oncorhynchus mykiss]_x0001_gb|ACO07797.1| 40S ribosomal protein S27 [Oncorhynchus mykiss]_x0001_gb|ACO07837.1| 40S ribosomal protein S27 [Oncorhynchus mykiss]_x0001_gb|ACO08588.1| 40S ribosomal protein S27 [Oncorhynchus mykiss]
DV191189.p.om.7	9	0.46	0.21	0.26	2.19048	gb|ACO07433.1|	Probable COP9 signalosome complex subunit 7 [Oncorhynchus mykiss]
CX141615.p.om.7	44	2.21	1.01	1.19	2.18812	dbj|BAD90027.1|	heat shock 70kDa protein 8 isoform b [Oncorhynchus mykiss]
CR374460.p.om.7	53	2.23	1.02	1.21	2.18627	ref|NP_001133336.1|	U4/U6 small nuclear ribonucleoprotein Prp4 [Salmo salar]_x0001_gb|ACI33049.1| U4/U6 small nuclear ribonucleoprotein Prp4 [Salmo salar]
BX076491.p.om.7	6	0.24	0.11	0.14	2.18182	gb|EAW57277.1|	zinc finger protein 180 (HHZ168), isoform CRA_d [Homo sapiens]
BX301146.p.om.7	6	0.24	0.11	0.13	2.18182	gb|AAH72771.1|	Cdt1 protein [Xenopus laevis]
BX304121.p.om.7	6	0.24	0.11	0.14	2.18182	gb|ACN11309.1|	U2 small nuclear ribonucleoprotein B [Salmo salar]
BX317740.p.om.7	6	0.24	0.11	0.13	2.18182	gb|ACO07469.1|	Proteasome subunit alpha type 3 [Oncorhynchus mykiss]
CA347487.p.om.7	6	0.24	0.11	0.13	2.18182	gb|ACN58730.1|	Cytoplasmic FMR1-interacting protein 1 homolog [Salmo salar]
CA351001.p.om.7	6	0.24	0.11	0.13	2.18182	gb|AAQ96232.1|	LRRGT00019 [Rattus norvegicus]
CT962557.p.om.7	3	0.24	0.11	0.13	2.18182	gb|AAI62152.1|	Myosin, heavy polypeptide 11, smooth muscle [Danio rerio]
CX255831.p.om.7	3	0.24	0.11	0.13	2.18182	gb|EEH04749.1|	proteoglycan [Ajellomyces capsulatus G186AR]
CX255860.p.om.7	3	0.24	0.11	0.13	2.18182	ref|NP_001071270.1|	2-C-methyl-D-erythritol 4-phosphate cytidylyltransferase-like protein [Danio rerio]_x0001_sp|A0JPF9.1|ISPDL_DANRE RecName: Full=2-C-methyl-D-erythritol 4-phosphate cytidylyltransferase-like protein_x0001_gb|AAI27406.1| Zgc:154151 [Danio rerio]
BX319348.p.om.7	44	1.81	0.83	0.98	2.18072	gb|ACM09018.1|	ADP-sugar pyrophosphatase [Salmo salar]
BX074484.p.om.7	38	1.22	0.56	0.66	2.17857	ref|NP_001167118.1|	Zinc finger MIZ domain-containing protein 2 [Salmo salar]_x0001_gb|ACN10874.1| Zinc finger MIZ domain-containing protein 2 [Salmo salar]
BX886819.p.om.7	41	1.85	0.85	1	2.17647	emb|CAP09559.1|	splicing factor, arginine/serine-rich 6 [Danio rerio]
BX084798.p.om.7	9	0.37	0.17	0.21	2.17647	gb|ACN58670.1|	Elongation factor 2 [Salmo salar]
BX321434.p.om.7	9	0.37	0.17	0.21	2.17647	gb|ACN60317.1|	3-phosphoinositide-dependent protein kinase 1 [Salmo salar]
CA377172.p.om.7	35	1.24	0.57	0.66	2.17544	gb|ACN10371.1|	Single-stranded DNA-binding protein, mitochondrial precursor [Salmo salar]_x0001_gb|ACN12733.1| Single-stranded DNA-binding protein, mitochondrial precursor [Salmo salar]
BX866303.p.om.7	82	4.71	2.17	2.54	2.17051	ref|NP_081024.3|	integrator complex subunit 1 [Mus musculus]
CA353030.p.om.7	41	1.15	0.53	0.62	2.16981	ref|NP_001121022.1|	sorting nexin-4 [Rattus norvegicus]_x0001_gb|AAI66791.1| Snx4 protein [Rattus norvegicus]
CB490571.p.om.7	85	4.25	1.96	2.3	2.16837	ref|NP_001158739.1|	fucU homolog [Salmo salar]_x0001_gb|ACN10010.1| fucU homolog [Salmo salar]_x0001_gb|ACN12357.1| fucU homolog [Salmo salar]
BX074210.p.om.7	3	0.13	0.06	0.07	2.16667	ref|NP_001133442.1|	LanC-like protein 2 [Salmo salar]_x0001_gb|ACI33244.1| LanC-like protein 2 [Salmo salar]
BX074709.p.om.7	76	3.12	1.44	1.68	2.16667	gb|ACM08707.1|	Ubiquitin-conjugating enzyme E2 D2 [Salmo salar]
BX074859.p.om.7	3	0.13	0.06	0.07	2.16667	emb|CAP47206.1|	perforin 1 [Sparus aurata]
BX077957.p.om.7	3	0.13	0.06	0.07	2.16667	dbj|BAB13483.1|	Ras homolog [Mus musculus]
BX078127.p.om.7	3	0.13	0.06	0.07	2.16667	dbj|BAD52074.1|	cyclin B3 [Anguilla japonica]
BX079390.p.om.7	3	0.13	0.06	0.07	2.16667	gb|ACM08812.1|	Splicing factor, arginine/serine-rich 7 [Salmo salar]
BX081981.p.om.7	3	0.13	0.06	0.07	2.16667	gb|ACI33503.1|	5-aminolevulinate synthase, nonspecific, mitochondrial precursor [Salmo salar]
BX087953.p.om.7	3	0.13	0.06	0.07	2.16667	gb|AAF13269.1|AF199421_1	PDZ domain actin binding protein Shroom [Mus musculus]
BX297827.p.om.7	3	0.13	0.06	0.07	2.16667	gb|ACI66821.1|	Isochorismatase domain-containing protein 2, mitochondrial precursor [Salmo salar]
BX298002.p.om.7	3	0.13	0.06	0.07	2.16667	ref|NP_001134377.1|	Exosome complex exonuclease RRP44 [Salmo salar]_x0001_gb|ACI67260.1| Exosome complex exonuclease RRP44 [Salmo salar]
BX300823.p.om.7	3	0.13	0.06	0.07	2.16667	gb|AAH90411.1|	Dopey1 protein [Danio rerio]
BX305003.p.om.7	3	0.13	0.06	0.07	2.16667	ref|NP_001117982.1|	valosin containing protein [Oncorhynchus mykiss]_x0001_gb|AAU14869.1| valosin containing protein [Oncorhynchus mykiss]
BX307039.p.om.7	3	0.13	0.06	0.07	2.16667	ref|NP_001133876.1|	dipeptidyl peptidase 3 [Salmo salar]_x0001_gb|ACI34066.1| Dipeptidyl-peptidase 3 [Salmo salar]
BX307904.p.om.7	3	0.13	0.06	0.07	2.16667	gb|AAT34988.1|	stromal cell derived factor 2-like protein [Branchiostoma belcheri tsingtauense]
BX311103.p.om.7	6	0.26	0.12	0.14	2.16667	gb|ACI68956.1|	39S ribosomal protein L11, mitochondrial precursor [Salmo salar]_x0001_gb|ACI69257.1| 39S ribosomal protein L11, mitochondrial precursor [Salmo salar]
BX313342.p.om.7	3	0.13	0.06	0.07	2.16667	gb|EU563851.1|	Rattus norvegicus strain Copenhagen furry-like protein (Fry) mRNA, complete cds
BX314003.p.om.7	3	0.13	0.06	0.07	2.16667	gb|ACO09781.1|	twisted gastrulation precursor [Osmerus mordax]
BX314984.p.om.7	3	0.13	0.06	0.07	2.16667	emb|CAF96644.1|	unnamed protein product [Tetraodon nigroviridis]
BX857401.p.om.7	3	0.13	0.06	0.07	2.16667	gb|AAZ06768.1|	Wee1 kinase [Anabas testudineus]
BX857595.p.om.7	3	0.13	0.06	0.07	2.16667	ref|NP_998625.2|	synaptotagmin XIa [Danio rerio]
BX858632.p.om.7	6	0.26	0.12	0.14	2.16667	gb|ACO09406.1|	Mitochondrial import inner membrane translocase subunit Tim23 [Osmerus mordax]
BX864215.p.om.7	3	0.13	0.06	0.07	2.16667	ref|NP_001076325.1|	nuclear receptor ROR-beta [Danio rerio]_x0001_gb|ABO15413.1| retinoid-related orphan receptor b [Danio rerio]
BX865840.p.om.7	9	0.26	0.12	0.14	2.16667	ref|NP_001020631.1|	SPRY domain-containing SOCS box protein 1 [Danio rerio]_x0001_gb|AAH97174.1| SplA/ryanodine receptor domain and SOCS box containing 1 [Danio rerio]
BX867474.p.om.7	3	0.13	0.06	0.07	2.16667	ref|NP_001018387.1|	SWI/SNF-related matrix-associated actin-dependent regulator of chromatin subfamily E member 1-related isoform 1 [Danio rerio]_x0001_gb|AAH95120.1| High-mobility group 20B [Danio rerio]_x0001_emb|CAK10914.1| novel HMG (high mobility group) box domain containing protein [Danio rerio]_x0001_gb|AAI34980.1| High-mobility group 20B [Danio rerio]_x0001_gb|AAI64068.1| Hmg20b protein [Danio rerio]
BX868307.p.om.7	6	0.26	0.12	0.15	2.16667	ref|NM_152958.1|	Danio rerio polyhomeotic-like 2 (Drosophila) (phc2), transcript variant 1, mRNA_x0001_dbj|AB064940.1| Danio rerio mRNA for polyhomeotic Ph2alpha homolog, complete cds
BX869031.p.om.7	3	0.13	0.06	0.07	2.16667	ref|NP_571679.2|	runt-related transcription factor 3 [Danio rerio]_x0001_gb|AAG43183.1|AF104037_1 transcription factor runt-1 [Danio rerio]_x0001_gb|AAO85550.1| Runx3 transcription factor [Danio rerio]_x0001_gb|AAI63552.1| Runx3 protein [Danio rerio]_x0001_gb|AAI63560.1| Runx3 protein [Danio rerio]
BX869115.p.om.7	3	0.13	0.06	0.07	2.16667	gb|ACN58618.1|	DNA replication licensing factor mcm2 [Salmo salar]
BX870006.p.om.7	3	0.13	0.06	0.07	2.16667	emb|CAG12469.1|	unnamed protein product [Tetraodon nigroviridis]
BX870982.p.om.7	3	0.13	0.06	0.07	2.16667	gb|AAI55843.1|	Ctbp2 protein [Danio rerio]
BX871708.p.om.7	3	0.13	0.06	0.07	2.16667	gb|AAA62850.1|	nodulin [Medicago truncatula]
BX873230.p.om.7	3	0.13	0.06	0.07	2.16667	ref|NP_001165168.1|	RFamide-related peptide receptor [Danio rerio]_x0001_gb|ADB43134.1| neuropeptide GnIHR2 [Danio rerio]
BX874468.p.om.7	3	0.13	0.06	0.07	2.16667	ref|NP_001135173.1|	general transcription factor IIE, polypeptide 2-2 [Salmo salar]_x0001_gb|ACH70943.1| general transcription factor IIE, polypeptide 2-2 [Salmo salar]
BX877433.p.om.7	6	0.26	0.12	0.15	2.16667	gb|AAH98514.1|	Cryptochrome DASH [Danio rerio]
BX881617.p.om.7	3	0.13	0.06	0.07	2.16667	ref|NP_001155222.1|	mitogen-activated protein kinase kinase kinase 5 [Danio rerio]
BX882019.p.om.7	3	0.13	0.06	0.07	2.16667	gb|EDK97060.1|	bridging integrator 1, isoform CRA_a [Mus musculus]
BX883312.p.om.7	3	0.13	0.06	0.07	2.16667	gb|AAC83555.1|	neuronal double zinc finger protein [Homo sapiens]
BX883566.p.om.7	3	0.13	0.06	0.07	2.16667	ref|NP_001089076.1|	Rap guanine nucleotide exchange factor (GEF) 3 [Xenopus laevis]_x0001_gb|AAS90633.1| Rap1 guanine-nucleotide exchange factor [Xenopus laevis]
BX886780.p.om.7	3	0.13	0.06	0.07	2.16667	gb|AAL18011.1|	Cxcr4A [Danio rerio]
BX888500.p.om.7	3	0.13	0.06	0.07	2.16667	ref|NP_001134673.1|	Exosome complex exonuclease MTR3 [Salmo salar]_x0001_gb|ACI68438.1| Exosome complex exonuclease MTR3 [Salmo salar]
BX889556.p.om.7	3	0.13	0.06	0.07	2.16667	gb|ACN10977.1|	Epididymis-specific alpha-mannosidase precursor [Salmo salar]
BX909419.p.om.7	3	0.13	0.06	0.07	2.16667	gb|AAI55199.1|	Pepd protein [Danio rerio]
BX909746.p.om.7	3	0.13	0.06	0.07	2.16667	pir||JC7963	phospholysine phosphohistidine inorganic pyrophosphate phosphatase (EC 3.6.1.1) - Human_x0001_dbj|BAB16411.1| phospholysine phosphohistidine inorganic pyrophosphate phosphatase [Homo sapiens]_x0001_gb|AAI13632.1| LHPP protein [Homo sapiens]_x0001_gb|AAI13630.1| LHPP protein [Homo sapiens]_x0001_gb|EAW49268.1| phospholysine phosphohistidine inorganic pyrophosphate phosphatase, isoform CRA_e [Homo …
BX910805.p.om.7	3	0.13	0.06	0.07	2.16667	ref|NP_001133868.1|	TRM61 protein [Salmo salar]_x0001_gb|ACI34049.1| tRNA [Salmo salar]
BX913600.p.om.7	3	0.13	0.06	0.07	2.16667	gb|ACN11092.1|	Conserved oligomeric Golgi complex component 8 [Salmo salar]
BX914186.p.om.7	3	0.13	0.06	0.07	2.16667	gb|AAH38943.1|	Plekhm1 protein [Mus musculus]
CA345105.p.om.7	6	0.13	0.06	0.07	2.16667	gb|AAK49121.1|AF254955_1	aldehyde dehydrogenase [Danio rerio]_x0001_emb|CAI20833.1| aldehyde dehydrogenase 3 family, member D1 [Danio rerio]
CA352860.p.om.7	3	0.13	0.06	0.07	2.16667	gb|AAC32754.1|	aminopeptidase N [Pseudopleuronectes americanus]
CA352948.p.om.7	3	0.13	0.06	0.07	2.16667	gb|ACI33731.1|	3-methyl-2-oxobutanoate dehydrogenase kinase, mitochondrial precursor [Salmo salar]
CA382897.p.om.7	3	0.13	0.06	0.07	2.16667	ref|NP_001076210.1|	alpha-2-antiplasmin precursor [Oryctolagus cuniculus]_x0001_gb|AAZ52797.1| alpha-2-plasmin inhibitor precursor [Oryctolagus cuniculus]
CA385612.p.om.7	3	0.13	0.06	0.07	2.16667	ref|NP_001134181.1|	CPEB-associated factor Maskin [Salmo salar]_x0001_gb|ACI66500.1| CPEB-associated factor Maskin [Salmo salar]
CR362368.p.om.7	3	0.13	0.06	0.07	2.16667	gb|ACO14268.1|	Proteasome assembly chaperone 2 [Esox lucius]
CT568678.p.om.7	3	0.13	0.06	0.07	2.16667	gb|ACN10092.1|	Cytochrome b-c1 complex subunit 2, mitochondrial precursor [Salmo salar]_x0001_gb|ACN12439.1| Cytochrome b-c1 complex subunit 2, mitochondrial precursor [Salmo salar]
CU065637.p.om.7	3	0.13	0.06	0.07	2.16667	ref|NP_957176.1|	poly A binding protein, cytoplasmic 1 b [Danio rerio]_x0001_gb|AAH59662.1| Poly A binding protein, cytoplasmic 1 b [Danio rerio]_x0001_gb|AAH63948.1| Poly A binding protein, cytoplasmic 1 b [Danio rerio]_x0001_emb|CAX14278.1| poly A binding protein, cytoplasmic 1 b [Danio rerio]_x0001_emb|CAX13648.1| poly A binding protein, cytoplasmic 1 b [Danio rerio]
CU066909.p.om.7	3	0.13	0.06	0.07	2.16667	ref|NP_001133444.1|	C-C chemokine receptor type 6 [Salmo salar]_x0001_gb|ACI33246.1| C-C chemokine receptor type 6 [Salmo salar]
CU067435.p.om.7	3	0.13	0.06	0.07	2.16667	gb|ACN10706.1|	Eukaryotic translation initiation factor 3 subunit C [Salmo salar]
CU069306.p.om.7	3	0.13	0.06	0.07	2.16667	gb|AAI22410.1|	Strn4 protein [Danio rerio]
CU069485.p.om.7	9	0.39	0.18	0.22	2.16667	ref|NP_001133645.1|	Selenium-binding protein 1 [Salmo salar]_x0001_gb|ACI33628.1| Selenium-binding protein 1 [Salmo salar]
GE823762.p.om.7	3	0.13	0.06	0.07	2.16667	ref|NP_001118061.1|	testis catalytic subunit of cyclic adenosine 3', 5'-monophosphate dependent protein kinase [Oncorhynchus mykiss]_x0001_pir||JC7968 cyclic adenosine 3',5'-monophosphate (cAMP)-dependent protein kinase (EC 2.7.1.37), catalytic subunit - rainbow trout_x0001_dbj|BAC65325.1| testis catalytic subunit of cyclic adenosine 3', 5'-monophosphate dependent protein kinase [Oncorhynchus mykiss]
GE838428.p.om.7	6	0.26	0.12	0.15	2.16667	ref|NP_001002379.2|	ectonucleoside triphosphate diphosphohydrolase-like [Danio rerio]
BX305081.p.om.7	29	1.19	0.55	0.63	2.16364	ref|NP_001139930.1|	DNA-directed RNA polymerase III subunit RPC6 [Salmo salar]_x0001_gb|ACM08743.1| DNA-directed RNA polymerase III subunit RPC6 [Salmo salar]
CB487385.p.om.7	920	123.01	56.86	66.2	2.16338	ref|NP_001134368.1|	40S ribosomal protein S8 [Salmo salar]_x0001_gb|ACH70881.1| ribosomal protein S8 [Salmo salar]_x0001_gb|ACI67241.1| 40S ribosomal protein S8 [Salmo salar]
GE823881.p.om.7	44	1.99	0.92	1.08	2.16304	ref|XP_002367204.1|	M protein repeat-containing protein [Toxoplasma gondii ME49]_x0001_gb|EEB00064.1| M protein repeat-containing protein [Toxoplasma gondii ME49]
BX084596.p.om.7	41	1.62	0.75	0.88	2.16	ref|NP_001099529.1|	THO complex subunit 3 [Rattus norvegicus]_x0001_gb|EDL94059.1| THO complex 3 (predicted) [Rattus norvegicus]_x0001_gb|AAI68852.1| THO complex 3 [Rattus norvegicus]
BX086861.p.om.7	20	0.41	0.19	0.21	2.15789	ref|NP_001038121.1|	afadin- and alpha-actinin-binding protein [Gallus gallus]_x0001_gb|ABB53476.1| light-inducible and clock-controlled protein [Gallus gallus]
CU065301.p.om.7	32	1.23	0.57	0.66	2.15789	ref|NP_001134842.1|	probable signal peptidase complex subunit 2 [Salmo salar]_x0001_gb|ACI69108.1| Probable signal peptidase complex subunit 2 [Salmo salar]
BX884882.p.om.7	38	1.92	0.89	1.04	2.1573	gb|ACN09834.1|	ATP synthase subunit d, mitochondrial [Salmo salar]_x0001_gb|ACN12181.1| ATP synthase subunit d, mitochondrial [Salmo salar]
BX316358.p.om.7	6	0.28	0.13	0.16	2.15385	ref|NP_001158529.1|	small ubiquitin-related modifier 2 [Oncorhynchus mykiss]_x0001_gb|ACI66384.1| Small ubiquitin-related modifier 2 precursor [Salmo salar]_x0001_gb|ACI67153.1| Small ubiquitin-related modifier 2 precursor [Salmo salar]_x0001_gb|ACI67520.1| Small ubiquitin-related modifier 2 precursor [Salmo salar]_x0001_gb|ACI68593.1| Small ubiquitin-related modifier 2 precursor [Salmo salar]_x0001_gb|ACI70075.1| S…
CU064990.p.om.7	9	0.28	0.13	0.16	2.15385	gb|AAO46100.1|	mage [Danio rerio]
CX248550.p.om.7	3	0.28	0.13	0.16	2.15385	ref|NP_066482.1|	NADH dehydrogenase subunit 10 [Rhodomonas salina]_x0001_gb|AAG17753.1|AF288090_29 NADH dehydrogenase subunit 10 [Rhodomonas salina]
DV191036.p.om.7	355	36.15	16.8	19.3	2.15179	gb|ADG29194.1|	40S ribosomal protein S23 [Epinephelus coioides]
BX087734.p.om.7	61	1.44	0.67	0.77	2.14925	gb|ACI68908.1|	26S protease regulatory subunit 4 [Salmo salar]
BX866820.p.om.7	90	3.82	1.78	2.04	2.14607	ref|NP_001007349.1|	cysteine sulfinic acid decarboxylase [Danio rerio]_x0001_gb|AAH85529.1| Cysteine sulfinic acid decarboxylase [Danio rerio]_x0001_gb|AAI64685.1| Csad protein [Danio rerio]
CA349357.p.om.7	11135	590.29	275.09	315	2.14581	gb|ACH70979.1|	ribosomal protein L21-1 [Salmo salar]_x0001_gb|ACH70980.1| ribosomal protein L21-2 [Salmo salar]_x0001_gb|ACI66749.1| 60S ribosomal protein L21 [Salmo salar]_x0001_gb|ACI69491.1| 60S ribosomal protein L21 [Salmo salar]_x0001_gb|ACN09995.1| 60S ribosomal protein L21 [Salmo salar]_x0001_gb|ACN12342.1| 60S ribosomal protein L21 [Salmo salar]
BX075407.p.om.7	3	0.15	0.07	0.08	2.14286	gb|ACI67663.1|	RING finger protein 4 [Salmo salar]_x0001_gb|ACM08778.1| RING finger protein 4 [Salmo salar]
BX087022.p.om.7	3	0.15	0.07	0.08	2.14286	gb|ACN58676.1|	Sodium/potassium-transporting ATPase subunit alpha-1 precursor [Salmo salar]
BX307581.p.om.7	3	0.15	0.07	0.08	2.14286	emb|CAA41730.1|	MHC class II regulatory factor RFX [Homo sapiens]_x0001_gb|AAH49826.1| Regulatory factor X, 1 (influences HLA class II expression) [Homo sapiens]_x0001_dbj|BAI45600.1| regulatory factor X, 1 [synthetic construct]
BX309682.p.om.7	212	9	4.2	4.8	2.14286	ref|NP_001133113.1|	26S protease regulatory subunit 7 [Salmo salar]_x0001_gb|ACH70710.1| 26S protease regulatory subunit 7 [Salmo salar]_x0001_gb|ACI67013.1| 26S protease regulatory subunit 7 [Salmo salar]
BX909926.p.om.7	3	0.15	0.07	0.08	2.14286	emb|CAG01060.1|	unnamed protein product [Tetraodon nigroviridis]
CA342867.p.om.7	3	0.15	0.07	0.08	2.14286	gb|ACN58728.1|	Filamin-A [Salmo salar]
CA347661.p.om.7	3	0.15	0.07	0.08	2.14286	ref|NP_001133894.1|	N-arachidonyl glycine receptor [Salmo salar]_x0001_gb|ACI34095.1| N-arachidonyl glycine receptor [Salmo salar]
CA348548.p.om.7	3	0.15	0.07	0.08	2.14286	ref|NP_001117710.1|	pumilio-2 [Oncorhynchus mykiss]_x0001_dbj|BAE93116.1| pumilio-2A [Oncorhynchus mykiss]
CA361039.p.om.7	3	0.15	0.07	0.08	2.14286	ref|NP_997735.1|	protein-tyrosine kinase 2-beta [Danio rerio]_x0001_emb|CAD35931.1| proline-rich tyrosine kinase 2 [Danio rerio]_x0001_emb|CAI11603.1| protein tyrosine kinase 2 beta [Danio rerio]
CA364736.p.om.7	3	0.15	0.07	0.09	2.14286	ref|NP_989796.1|	armadillo repeat gene deletes in velocardiofacial syndrome [Gallus gallus]_x0001_gb|AAQ09510.1| ARVCF [Gallus gallus]
CA365271.p.om.7	3	0.15	0.07	0.08	2.14286	ref|NP_001139072.1|	calcium-activated potassium channel subunit alpha-1 [Danio rerio]_x0001_emb|CAX13266.1| novel calcium activated pottassium channel protein [Danio rerio]_x0001_emb|CAX13119.1| novel calcium activated pottassium channel protein [Danio rerio]_x0001_emb|CAX14059.1| novel calcium activated pottassium channel protein [Danio rerio]_x0001_emb|CAX13477.1| novel calcium activated pottassium channel protein…
CA370476.p.om.7	6	0.15	0.07	0.08	2.14286	gb|AAQ02423.1|	serum-inducible kinase [synthetic construct]
CB494338.p.om.7	3	0.15	0.07	0.08	2.14286	gb|ACI67361.1|	39S ribosomal protein L34, mitochondrial precursor [Salmo salar]
CT568968.p.om.7	6	0.15	0.07	0.08	2.14286	gb|ABY28364.1|	ribosomal protein L13A [Oncorhynchus masou formosanus]
CU066704.p.om.7	6	0.15	0.07	0.09	2.14286	gb|ACO09781.1|	twisted gastrulation precursor [Osmerus mordax]
CU069087.p.om.7	3	0.15	0.07	0.08	2.14286	gb|ACO09794.1|	Fibrinogen-like protein 1 precursor [Osmerus mordax]
CU072139.p.om.7	6	0.15	0.07	0.08	2.14286	dbj|BAD96965.1|	BZW1 protein variant [Homo sapiens]
CX006297.p.om.7	3	0.15	0.07	0.09	2.14286	ref|YP_001122910.1|	NADH dehydrogenase subunit 5 [Oncorhynchus kisutch]_x0001_gb|ABK81701.1| NADH dehydrogenase subunit 5 [Oncorhynchus kisutch]
GE827091.p.om.7	61	1.97	0.92	1.05	2.1413	ref|NP_001107097.1|	TNF receptor-associated protein 1 [Danio rerio]_x0001_gb|AAI54468.1| Trap1 protein [Danio rerio]_x0001_gb|AAI71630.1| TNF receptor-associated protein 1 [Danio rerio]_x0001_gb|AAI71634.1| TNF receptor-associated protein 1 [Danio rerio]
CA374554.p.om.7	58	1.54	0.72	0.82	2.13889	ref|NP_956023.1|	general transcription factor IIF subunit 1 [Danio rerio]_x0001_gb|AAH45951.1| General transcription factor IIF, polypeptide 1 [Danio rerio]_x0001_gb|AAI65577.1| Gtf2f1 protein [Danio rerio]
BX300377.p.om.7	26	1.09	0.51	0.58	2.13725	gb|AAH65943.1|	Dlst protein [Danio rerio]
BX083067.p.om.7	211	8.25	3.87	4.38	2.13178	ref|NP_001167054.1|	nuclear factor NF-kappa-B p100 subunit [Salmo salar]_x0001_gb|ACN10697.1| Nuclear factor NF-kappa-B p100 subunit [Salmo salar]
BX869373.p.om.7	26	1.15	0.54	0.61	2.12963	gb|ACO08026.1|	Coatomer subunit epsilon [Oncorhynchus mykiss]
AB116232.p.om.7	3	0.17	0.08	0.09	2.125	dbj|BAC81534.1|	AMPA-type glutamate receptor subunit 2 [Oncorhynchus mykiss]
BX311177.p.om.7	6	0.17	0.08	0.09	2.125	ref|NP_001080078.1|	sulfide quinone reductase-like [Xenopus laevis]_x0001_gb|AAH54152.1| Cg14997-prov protein [Xenopus laevis]
BX861209.p.om.7	3	0.17	0.08	0.1	2.125	ref|NP_001134642.1|	AP-1 complex subunit sigma-3 [Salmo salar]_x0001_gb|ACI68314.1| AP-1 complex subunit sigma-3 [Salmo salar]
BX889454.p.om.7	3	0.17	0.08	0.1	2.125	gb|AAI62639.1|	Prtga protein [Danio rerio]_x0001_gb|AAI62624.1| Prtga protein [Danio rerio]
BX890191.p.om.7	3	0.17	0.08	0.1	2.125	ref|NP_989840.1|	tyrosine-protein kinase transmembrane receptor ROR1 [Gallus gallus]_x0001_emb|CAF04323.1| tyrosine kinase orphan receptor 1 [Gallus gallus]
CA351596.p.om.7	3	0.17	0.08	0.09	2.125	emb|CAX14693.1|	mitogen-activated protein kinase kinase kinase kinase 5 [Danio rerio]
CA365684.p.om.7	3	0.17	0.08	0.09	2.125	gb|ACQ58069.1|	Hypoxanthine-guanine phosphoribosyltransferase [Anoplopoma fimbria]
CA380958.p.om.7	3	0.17	0.08	0.1	2.125	gb|ADG85747.1|	receptor (TNFRSF)-interacting serine-threonine kinase 1-like protein [Gadus morhua]
CA381228.p.om.7	3	0.17	0.08	0.1	2.125	gb|AAI36373.1|	BICD1 protein [Homo sapiens]
CA385394.p.om.7	3	0.17	0.08	0.09	2.125	ref|NP_001017741.2|	calcium/calmodulin-dependent protein kinase type II subunit alpha [Danio rerio]_x0001_gb|AAI07972.1| Calcium/calmodulin-dependent protein kinase (CaM kinase) II alpha [Danio rerio]
CB498173.p.om.7	3	0.17	0.08	0.1	2.125	gb|ACO08618.1|	Nuclear protein Hcc-1 [Oncorhynchus mykiss]
CX251419.p.om.7	3	0.17	0.08	0.1	2.125	gb|EAW48545.1|	MDN1, midasin homolog (yeast), isoform CRA_a [Homo sapiens]
CX254040.p.om.7	3	0.17	0.08	0.1	2.125	ref|NP_001166118.1|	ATP-binding cassette, sub-family C (CFTR/MRP), member 8 [Danio rerio]
BX311754.p.om.7	29	1.19	0.56	0.63	2.125	ref|NP_001133065.1|	eukaryotic translation initiation factor 4E type 3 [Salmo salar]_x0001_gb|ACH70623.1| eukaryotic translation initiation factor 4E family member 3 [Salmo salar]_x0001_gb|ACI68612.1| Eukaryotic translation initiation factor 4E type 3 [Salmo salar]_x0001_gb|ACN10257.1| Eukaryotic translation initiation factor 4E type 3 [Salmo salar]_x0001_gb|ACN12613.1| Eukaryotic translation initiation factor 4E ty…
CA356926.p.om.7	43	1.19	0.56	0.62	2.125	gb|EU025714.1|	Salmo salar retinoic acid receptor gamma a (Rarga), coiled-coil transcriptional coactivator a (Kiaa1536), homeobox protein HoxC13aa (HoxC13aa), homeobox protein HoxC12aa (HoxC12aa), homeobox protein HoxC11aa (HoxC11aa), homeobox protein HoxC10aa (HoxC10aa), homeobox protein HoxC9aa (HoxC9aa), homeobox protein HoxC8aa (HoxC8aa), and homeobox protein HoxC6aa (HoxC6aa) genes, complete cds
CA342766.p.om.7	98	6.16	2.9	3.25	2.12414	gb|ACO13602.1|	Elongation factor 1-beta [Esox lucius]
GE822581.p.om.7	23	0.91	0.43	0.48	2.11628	gb|ACO07704.1|	CobIyrinic acid a,c-diamide adenosyltransferase, mitochondrial precursor [Oncorhynchus mykiss]
BX320561.p.om.7	23	0.93	0.44	0.49	2.11364	ref|NP_001016044.1|	abl-interactor 2 [Xenopus (Silurana) tropicalis]_x0001_emb|CAJ82503.1| abl interactor 2 [Xenopus tropicalis]_x0001_gb|AAI71128.1| abl interactor 2 [Xenopus (Silurana) tropicalis]
BX083048.p.om.7	23	0.61	0.29	0.32	2.10345	gb|EDL94903.1|	rCG20112 [Rattus norvegicus]
CA346828.p.om.7	6	0.21	0.1	0.12	2.1	ref|NP_001133324.1|	interferon regulatory factor 5 [Salmo salar]_x0001_gb|ACI33029.1| Interferon regulatory factor 5 [Salmo salar]
CA381394.p.om.7	43	2.35	1.12	1.23	2.09821	gb|ACI32969.1|	Mitochondrial 28S ribosomal protein S29 [Salmo salar]
CA349384.p.om.7	43	1.93	0.92	1.01	2.09783	gb|ACM08987.1|	Cytochrome c1, heme protein, mitochondrial precursor [Salmo salar]
CA361939.p.om.7	186	5.24	2.5	2.74	2.096	gb|ACM08583.1|	High mobility group protein B2 [Salmo salar]
CU063664.p.om.7	20	0.44	0.21	0.23	2.09524	gb|ACO08898.1|	U3 small nucleolar RNA-interacting protein 2 [Osmerus mordax]
BX318108.p.om.7	23	0.67	0.32	0.35	2.09375	ref|NP_001134605.1|	Aurora kinase A-interacting protein [Salmo salar]_x0001_gb|ACI68176.1| Aurora kinase A-interacting protein [Salmo salar]
CA344124.p.om.7	2661	145.1	69.32	75.8	2.09319	ref|NP_001154074.1|	60S ribosomal protein L28 [Oncorhynchus mykiss]_x0001_gb|ACO07782.1| 60S ribosomal protein L28 [Oncorhynchus mykiss]
BX078003.p.om.7	440	14.96	7.15	7.81	2.09231	ref|NP_001074110.1|	N-acetylgalactosamine-6-sulfatase [Danio rerio]_x0001_gb|AAI29219.1| Galactosamine (N-acetyl)-6-sulfate sulfatase [Danio rerio]
CU062782.p.om.7	46	1.36	0.65	0.72	2.09231	gb|ACM08273.1|	Peptidyl-prolyl cis-trans isomerase, mitochondrial precursor [Salmo salar]_x0001_gb|ACM08579.1| Peptidyl-prolyl cis-trans isomerase, mitochondrial precursor [Salmo salar]
CA361152.p.om.7	17	0.92	0.44	0.47	2.09091	ref|NP_998404.1|	nuclear receptor subfamily 2, group F, member 6b [Danio rerio]_x0001_gb|AAH65332.1| Nuclear receptor subfamily 2, group F, member 6b [Danio rerio]
CA362572.p.om.7	20	0.69	0.33	0.36	2.09091	gb|ACI68688.1|	Lymphokine-activated killer T-cell-originated protein kinase homolog [Salmo salar]
GE828647.p.om.7	57	2.17	1.04	1.13	2.08654	gb|ACO07925.1|	Density-regulated protein [Oncorhynchus mykiss]
BX876979.p.om.7	20	0.5	0.24	0.26	2.08333	gb|GU129140.1|	Salmo salar IgH locus B genomic sequence
BX086481.p.om.7	20	0.52	0.25	0.27	2.08	ref|NP_001119851.1|	long-chain-fatty-acid--CoA ligase ACSBG2 [Danio rerio]
BX868906.p.om.7	20	1.04	0.5	0.54	2.08	emb|CAG02731.1|	unnamed protein product [Tetraodon nigroviridis]
CA370963.p.om.7	37	1.56	0.75	0.81	2.08	ref|NP_001074525.1|	exportin-T [Mus musculus]
BX088118.p.om.7	20	1.58	0.76	0.82	2.07895	ref|NP_955815.1|	E3 ubiquitin-protein ligase Siah1 [Danio rerio]_x0001_gb|AAH45870.1| Seven in absentia homolog 1 (Drosophila) [Danio rerio]_x0001_emb|CAK04515.1| seven in absentia homolog 1 (Drosophila) [Danio rerio]
CA366379.p.om.7	74	2.66	1.28	1.38	2.07812	gb|ACI68327.1|	39S ribosomal protein L14, mitochondrial precursor [Salmo salar]_x0001_gb|ACI68360.1| 39S ribosomal protein L14, mitochondrial precursor [Salmo salar]_x0001_gb|ACN09833.1| 39S ribosomal protein L14, mitochondrial precursor [Salmo salar]_x0001_gb|ACN12180.1| 39S ribosomal protein L14, mitochondrial precursor [Salmo salar]
CA381922.p.om.7	57	2.51	1.21	1.31	2.07438	ref|NP_001166035.1|	euchromatic histone-lysine N-methyltransferase 1b [Danio rerio]
DV190893.p.om.7	17	1.12	0.54	0.58	2.07407	gb|ACI33076.1|	ATP synthase subunit alpha, mitochondrial precursor [Salmo salar]_x0001_gb|ACN10935.1| ATP synthase subunit alpha, mitochondrial precursor [Salmo salar]
BX295296.p.om.7	17	0.58	0.28	0.3	2.07143	gb|ACI67140.1|	Non-structural maintenance of chromosomes element 1 homolog [Salmo salar]
BX880706.p.om.7	14	0.58	0.28	0.29	2.07143	gb|AAI63680.1|	Vps13a protein [Danio rerio]
GE827130.p.om.7	400	15.03	7.26	7.77	2.07025	gb|ACO08408.1|	Proteasome subunit beta type 7 precursor [Oncorhynchus mykiss]
CA355639.p.om.7	17	0.89	0.43	0.46	2.06977	ref|NP_998080.1|	spastin [Danio rerio]_x0001_gb|AAH67715.1| Spastin [Danio rerio]
CX006173.p.om.7	14	0.6	0.29	0.3	2.06897	ref|NP_001134023.1|	cleavage and polyadenylation specificity factor subunit 2 [Salmo salar]_x0001_gb|ACI34329.1| Cleavage and polyadenylation specificity factor subunit 2 [Salmo salar]
CA374864.p.om.7	17	3.91	1.89	2.02	2.06878	ref|NP_001133371.1|	Tripartite motif-containing protein 13 [Salmo salar]_x0001_gb|ACI33103.1| Tripartite motif-containing protein 13 [Salmo salar]
BX306204.p.om.7	88	3.31	1.6	1.71	2.06875	gb|AAH96952.1|	Glrx protein [Danio rerio]_x0001_gb|AAI65481.1| Glrx protein [Danio rerio]
CA342475.p.om.7	54	2.11	1.02	1.1	2.06863	gb|AAG30296.1|	cytochrome P450 [Ictalurus punctatus]
BX317589.p.om.7	31	1.22	0.59	0.62	2.0678	gb|ACI66096.1|	Copper transport protein ATOX1 [Salmo salar]_x0001_gb|ACI66656.1| Copper transport protein ATOX1 [Salmo salar]_x0001_gb|ACI66789.1| Copper transport protein ATOX1 [Salmo salar]_x0001_gb|ACI69489.1| Copper transport protein ATOX1 [Salmo salar]_x0001_gb|ACO08426.1| Copper transport protein ATOX1 [Oncorhynchus mykiss]_x0001_gb|ACO13648.1| Copper transport protein ATOX1 [Esox lucius]_x0001_gb|ACO1425…
BX862225.p.om.7	68	1.26	0.61	0.65	2.06557	dbj|AK348675.1|	Sus scrofa mRNA, clone:OVRT10031A01, expressed in ovary
DV193216.p.om.7	102	9.27	4.49	4.78	2.06459	gb|DAA19138.1|	synergin, gamma [Bos taurus]
GE830311.p.om.7	51	1.96	0.95	1.01	2.06316	ref|NP_001134782.1|	Peptidyl-prolyl cis-trans isomerase-like 3 [Salmo salar]_x0001_gb|ACI68849.1| Peptidyl-prolyl cis-trans isomerase-like 3 [Salmo salar]
CA343131.p.om.7	405	19.37	9.39	9.99	2.06283	emb|CAM15128.1|	eukaryotic translation initiation factor 3, subunit 7 zeta [Danio rerio]
X75798.p.om.7	14	0.33	0.16	0.17	2.0625	ref|NP_001117109.1|	myoblast determination protein 1 homolog [Salmo salar]_x0001_emb|CAD89607.1| myoblast determination protein 1 [Salmo salar]_x0001_emb|CAF02093.1| myoblast determination protein 1 [Salmo salar]
BX295380.p.om.7	17	0.68	0.33	0.35	2.06061	emb|CAC86146.1|	EZH2 homolog [Tetraodon nigroviridis]
CX029049.p.om.7	51	1.36	0.66	0.7	2.06061	gb|EAW62372.1|	CDC42 small effector 2, isoform CRA_a [Homo sapiens]
CD810906.p.om.7	17	1.77	0.86	0.91	2.05814	gb|ACO15170.1|	Ferritin, heavy subunit [Caligus clemensi]
CR373339.p.om.7	17	0.72	0.35	0.37	2.05714	ref|NP_001020685.1|	hypothetical protein LOC561476 [Danio rerio]_x0001_gb|AAH96881.1| Zgc:112285 [Danio rerio]
CA343235.p.om.7	20	0.37	0.18	0.19	2.05556	ref|NP_001135259.1|	Lamina-associated polypeptide 2 isoform beta [Salmo salar]_x0001_gb|ACI33979.1| Lamina-associated polypeptide 2 isoform beta [Salmo salar]
CR368817.p.om.7	17	0.74	0.36	0.38	2.05556	ref|XP_002663245.1|	PREDICTED: hypothetical protein [Danio rerio]
CX141266.p.om.7	14	0.74	0.36	0.37	2.05556	gb|AAI62148.1|	Bloodthirsty [Danio rerio]_x0001_gb|AAI62141.1| Bloodthirsty [Danio rerio]
CA364910.p.om.7	14	0.78	0.38	0.39	2.05263	gb|EDL94443.1|	rCG57728, isoform CRA_a [Rattus norvegicus]_x0001_gb|EDL94444.1| rCG57728, isoform CRA_a [Rattus norvegicus]
CU073163.p.om.7	14	0.39	0.19	0.2	2.05263	gb|EDM12399.1|	rCG48263 [Rattus norvegicus]
BX298024.p.om.7	82	2.62	1.28	1.35	2.04688	ref|NP_001154149.1|	Translation machinery-associated protein 20 [Oncorhynchus mykiss]_x0001_gb|ACH70856.1| malignant T cell amplified sequence 1 [Salmo salar]_x0001_gb|ACI68797.1| Translation machinery-associated protein 20 [Salmo salar]_x0001_gb|ACO07707.1| Translation machinery-associated protein 20 [Oncorhynchus mykiss]_x0001_gb|ACO08055.1| Translation machinery-associated protein 20 [Oncorhynchus mykiss]
BX306766.p.om.7	17	0.9	0.44	0.47	2.04545	ref|NP_001167332.1|	DET1 homolog [Salmo salar]_x0001_gb|ACN11393.1| DET1 homolog [Salmo salar]
BX305731.p.om.7	20	0.47	0.23	0.25	2.04348	ref|NP_001133567.1|	Sialic acid synthase [Salmo salar]_x0001_gb|ACI33492.1| Sialic acid synthase [Salmo salar]
CT564242.p.om.7	20	0.47	0.23	0.25	2.04348	gb|ACM09553.1|	60S ribosomal protein L7 [Salmo salar]
BX863826.p.om.7	152	6.68	3.27	3.41	2.04281	gb|ACN10059.1|	60S ribosomal protein L14 [Salmo salar]_x0001_gb|ACN10369.1| 60S ribosomal protein L14 [Salmo salar]_x0001_gb|ACN12406.1| 60S ribosomal protein L14 [Salmo salar]_x0001_gb|ACN12730.1| 60S ribosomal protein L14 [Salmo salar]
CA374734.p.om.7	163	5.45	2.67	2.78	2.0412	ref|NP_001101358.2|	probable ribosome biogenesis protein NEP1 [Rattus norvegicus]_x0001_gb|EDM01948.1| EMG1 nucleolar protein homolog (S. cerevisiae) (predicted), isoform CRA_b [Rattus norvegicus]
BX911902.p.om.7	28	1.49	0.73	0.75	2.0411	ref|NP_001134076.1|	Otoraplin [Salmo salar]_x0001_gb|ACI66143.1| Otoraplin precursor [Salmo salar]
CA373892.p.om.7	28	1.02	0.5	0.51	2.04	gb|ABP65284.1|	ugly duckling [Danio rerio]
BX080411.p.om.7	17	0.53	0.26	0.27	2.03846	gb|AC147903.2|	Xenopus (Silurana) tropicalis clone CH216-57O14, complete sequence
BX298078.p.om.7	14	0.53	0.26	0.27	2.03846	gb|BC144335.1|	Homo sapiens cDNA clone IMAGE:9052855, containing frame-shift errors
BX870824.p.om.7	59	2.69	1.32	1.37	2.03788	ref|NP_001154149.1|	Translation machinery-associated protein 20 [Oncorhynchus mykiss]_x0001_gb|ACH70856.1| malignant T cell amplified sequence 1 [Salmo salar]_x0001_gb|ACI68797.1| Translation machinery-associated protein 20 [Salmo salar]_x0001_gb|ACO07707.1| Translation machinery-associated protein 20 [Oncorhynchus mykiss]_x0001_gb|ACO08055.1| Translation machinery-associated protein 20 [Oncorhynchus mykiss]
CU072435.p.om.7	42	1.08	0.53	0.55	2.03774	emb|CAM26620.1|	novel KRAB box and zinc finger, C2H2 type domain containing protein [Mus musculus]
CX720210.p.om.7	42	2.16	1.06	1.09	2.03774	gb|ACO07512.1|	CutA homolog precursor [Oncorhynchus mykiss]
CU068224.p.om.7	14	0.55	0.27	0.28	2.03704	ref|NP_001140091.1|	Clathrin light chain B [Salmo salar]_x0001_gb|ACM09625.1| Clathrin light chain B [Salmo salar]
BX311206.p.om.7	17	0.57	0.28	0.29	2.03571	gb|ACI66973.1|	Transcription factor A, mitochondrial precursor [Salmo salar]
BX317544.p.om.7	14	0.57	0.28	0.29	2.03571	gb|ACI34086.1|	Splicing factor, arginine/serine-rich 7 [Salmo salar]
CU074860.p.om.7	14	0.59	0.29	0.3	2.03448	gb|EDL95136.1|	rCG27555, isoform CRA_b [Rattus norvegicus]
CA368514.p.om.7	14	0.63	0.31	0.32	2.03226	gb|ACO09457.1|	Adhesion-regulating molecule 1 precursor [Osmerus mordax]
BX078261.p.om.7	31	1.28	0.63	0.66	2.03175	gb|ACM09527.1|	GATA zinc finger domain-containing protein 1 [Salmo salar]
CX257467.p.om.7	14	1.3	0.64	0.66	2.03125	gb|EAW58732.1|	jumonji domain containing 2C, isoform CRA_c [Homo sapiens]
CA342524.p.om.7	53	1.36	0.67	0.68	2.02985	emb|CAN87929.1|	elaC homolog 1 (E. coli) [Danio rerio]
CX037115.p.om.7	28	2.05	1.01	1.04	2.0297	gb|ACI69000.1|	Ubiquitin-conjugating enzyme E2 D4 [Salmo salar]
BX885984.p.om.7	67	2.31	1.14	1.16	2.02632	gb|ACI67772.1|	C-factor [Salmo salar]_x0001_gb|ACI69312.1| C-factor [Salmo salar]
BX913145.p.om.7	25	0.99	0.49	0.5	2.02041	gb|AAH65953.1|	RNA binding protein S1, serine-rich domain [Danio rerio]
CU072986.p.om.7	42	0.99	0.49	0.5	2.02041	dbj|BAA31592.2|	KIAA0617 protein [Homo sapiens]
CU072703.p.om.7	81	2.99	1.48	1.51	2.02027	gb|ACN10702.1|	Nuclear migration protein nudC [Salmo salar]
GE823518.p.om.7	151	7.07	3.5	3.58	2.02	gb|ACI68215.1|	Small ubiquitin-related modifier 2 precursor [Salmo salar]
BX881935.p.om.7	25	1.03	0.51	0.51	2.01961	gb|ACI67558.1|	Mitochondrial import inner membrane translocase subunit Tim22 [Salmo salar]
BX316314.p.om.7	28	1.05	0.52	0.53	2.01923	emb|CAX13607.1|	novel protein similar to vertebrate guanine nucleotide binding protein (G protein), beta polypeptide 1-like (GNB1L, zgc:110763) [Danio rerio]_x0001_emb|CAX14217.1| novel protein similar to vertebrate guanine nucleotide binding protein (G protein), beta polypeptide 1-like (GNB1L, zgc:110763) [Danio rerio]
BX889150.p.om.7	134	5.35	2.65	2.7	2.01887	gb|EAW94483.1|	dynein, light chain, LC8-type 2, isoform CRA_a [Homo sapiens]
CB493949.p.om.7	176	6.64	3.29	3.35	2.01824	ref|NM_001045552.1|	Danio rerio mitogen-activated protein kinase 6 (mapk6), mRNA_x0001_gb|DQ360074.1| Danio rerio extracellular signal-regulated kinase 3 (erk3) mRNA, complete cds
CB496393.p.om.7	81	3.32	1.65	1.68	2.01212	gb|EDL35494.1|	CCR4-NOT transcription complex, subunit 7, isoform CRA_a [Mus musculus]
CA342029.p.om.7	25	1.75	0.87	0.87	2.01149	gb|AAI55883.1|	Xnf7 protein [Xenopus laevis]
CX041414.p.om.7	25	1.75	0.87	0.88	2.01149	emb|CAX14305.1|	suppressor of defective silencing 3 homolog (SDS3, S. cerevisiae) [Danio rerio]
CA374363.p.om.7	64	1.81	0.9	0.91	2.01111	gb|AAH59902.1|	Ptpn23 protein [Mus musculus]
CR368999.p.om.7	89	4.86	2.42	2.44	2.00826	ref|NP_082358.2|	CCR4-NOT transcription complex subunit 2 isoform b [Mus musculus]
AB047032.p.om.7	3	0.06	0.03	0.03	2	gb|AAZ92554.1|	steroidogenic acute regulatory protein [Micropterus salmoides]
AF059711.p.om.7	3	0.04	0.02	0.02	2	gb|AAD14035.1|S69277_1	3-methylcholanthrene responsive gene [Oncorhynchus mykiss]
AF425074.p.om.7	3	0.08	0.04	0.05	2	ref|NP_001117793.1|	SWS1 opsin [Oncorhynchus mykiss]_x0001_gb|AAP35091.1|AF425074_1 SWS1 opsin [Oncorhynchus mykiss]
AJ132620.p.om.7	3	0.06	0.03	0.03	2	ref|NP_001117818.1|	apolipoprotein E [Oncorhynchus mykiss]_x0001_emb|CAB65320.1| apolipoprotein E [Oncorhynchus mykiss]
AJ238307.p.om.7	3	0.04	0.02	0.02	2	ref|NP_001117820.1|	cyclooxygenase-2 [Oncorhynchus mykiss]_x0001_emb|CAB46017.1| cyclooxygenase-2 [Oncorhynchus mykiss]
AJ548843.p.om.7	3	0.06	0.03	0.03	2	emb|CAD70074.2|	interleukin-16 [Oncorhynchus mykiss]
AY319304.p.om.7	4	0.02	0.01	0.02	2	ref|NP_001118101.1|	neuronal-type voltage-gated calcium channel subunit Cav2.2 [Oncorhynchus mykiss]_x0001_gb|AAP83588.1| neuronal-type voltage-gated calcium channel subunit Cav2.2 [Oncorhynchus mykiss]
BX076378.p.om.7	3	0.06	0.03	0.04	2	ref|NP_955848.1|	glycine dehydrogenase [decarboxylating], mitochondrial [Danio rerio]_x0001_gb|AAH57478.1| Glycine dehydrogenase (decarboxylating) [Danio rerio]
BX077702.p.om.7	3	0.12	0.06	0.07	2	ref|NP_001133337.1|	Calponin-3 [Salmo salar]_x0001_gb|ACI33050.1| Calponin-3 [Salmo salar]
BX084209.p.om.7	3	0.12	0.06	0.07	2	gb|ACI67174.1|	Gamma-interferon-inducible lysosomal thiol reductase precursor [Salmo salar]
BX087156.p.om.7	25	0.86	0.43	0.43	2	gb|EAW93403.1|	integrator complex subunit 7, isoform CRA_c [Homo sapiens]
BX299412.p.om.7	3	0.12	0.06	0.07	2	ref|NP_001158805.1|	Anaphase-promoting complex subunit 5 [Salmo salar]_x0001_gb|ACN10505.1| Anaphase-promoting complex subunit 5 [Salmo salar]
BX299584.p.om.7	3	0.1	0.05	0.06	2	ref|NP_001139986.1|	SUMO-activating enzyme subunit 1 [Salmo salar]_x0001_gb|ACM09034.1| SUMO-activating enzyme subunit 1 [Salmo salar]
BX299635.p.om.7	3	0.12	0.06	0.07	2	dbj|AB527407.1|	Synthetic construct DNA, clone: pF1KB3463, Homo sapiens RAPGEF6 gene for Rap guanine nucleotide exchange factor (GEF) 6, without stop codon, in Flexi system
BX303682.p.om.7	3	0.12	0.06	0.07	2	ref|NP_001133163.1|	ATP synthase subunit b, mitochondrial [Salmo salar]_x0001_gb|ACH70848.1| ATP synthase, H+ transporting, mitochondrial F0 complex, subunit b, isoform 1 [Salmo salar]
BX303785.p.om.7	3	0.06	0.03	0.04	2	gb|ACN58643.1|	Solute carrier family 28 member 3 [Salmo salar]
BX307184.p.om.7	3	0.12	0.06	0.07	2	ref|NP_001129150.1|	ankyrin repeat domain-containing protein 27 [Gallus gallus]
BX307959.p.om.7	3	0.12	0.06	0.07	2	gb|AAC50825.1|	cyclin C [Homo sapiens]_x0001_prf||2208321A cyclin C
BX308153.p.om.7	14	0.58	0.29	0.29	2	dbj|BAA86593.1|	KIAA1279 protein [Homo sapiens]
BX308602.p.om.7	3	0.12	0.06	0.07	2	gb|ACN58697.1|	SWI/SNF-related matrix-associated actin-dependent regulator of chromatin subfamily B member 1 [Salmo salar]
BX309650.p.om.7	25	1.16	0.58	0.58	2	gb|AAI57980.1|	ESF1, nucleolar pre-rRNA processing protein, homolog (S. cerevisiae) [Mus musculus]
BX318069.p.om.7	3	0.12	0.06	0.07	2	ref|NP_997952.1|	protein unc-119 homolog B [Danio rerio]_x0001_gb|AAK70467.1|AF387342_1 Unc119c [Danio rerio]_x0001_gb|AAI62277.1| Unc-119 homolog 1 [Danio rerio]_x0001_gb|AAI62287.1| Unc-119 homolog 1 [Danio rerio]
BX319374.p.om.7	3	0.12	0.06	0.07	2	ref|NP_956002.1|	basic leucine zipper and W2 domain-containing protein 1-A [Danio rerio]_x0001_sp|Q6PD83.1|BZW1A_DANRE RecName: Full=Basic leucine zipper and W2 domain-containing protein 1-A_x0001_gb|AAH58875.1| Basic leucine zipper and W2 domains 1a [Danio rerio]_x0001_emb|CAK04748.1| basic leucine zipper and W2 domains 1 [Danio rerio]
BX321439.p.om.7	3	0.1	0.05	0.06	2	gb|ACI69181.1|	Dehydrogenase/reductase SDR family member 7B [Salmo salar]
BX856708.p.om.7	39	1.64	0.82	0.83	2	ref|XM_001653586.1|	Aedes aegypti prolylcarboxypeptidase partial mRNA
BX858850.p.om.7	14	0.38	0.19	0.19	2	gb|AAI71358.1|	L(3)mbt-like 2 (Drosophila) [Danio rerio]
BX859644.p.om.7	14	0.62	0.31	0.31	2	gb|AAI55268.1|	Rangap1 protein [Danio rerio]
BX862165.p.om.7	3	0.06	0.03	0.03	2	ref|NP_001104189.1|	insulinoma-associated 1 [Xenopus laevis]_x0001_gb|ABU50799.1| insuloma-associated 1 [Xenopus laevis]
BX870773.p.om.7	3	0.08	0.04	0.05	2	ref|NP_001167279.1|	protein phosphatase 1A, magnesium dependent, alpha [Salmo salar]_x0001_gb|ACN11259.1| phosphatase 1A [Salmo salar]
BX873018.p.om.7	3	0.08	0.04	0.04	2	emb|CAD56864.1|	FosB protein [Takifugu rubripes]
BX889327.p.om.7	3	0.1	0.05	0.06	2	ref|NP_001139981.1|	Cytokine-like protein 1 [Salmo salar]_x0001_gb|ACM08774.1| Cytokine-like protein 1 precursor [Salmo salar]_x0001_gb|ACM09005.1| Cytokine-like protein 1 precursor [Salmo salar]_x0001_gb|ACM09670.1| Cytokine-like protein 1 precursor [Salmo salar]
CA343019.p.om.7	3	0.04	0.02	0.02	2	gb|ACI68448.1|	Fatty acid-binding protein, intestinal [Salmo salar]
CA343578.p.om.7	3	0.08	0.04	0.05	2	ref|NP_957176.1|	poly A binding protein, cytoplasmic 1 b [Danio rerio]_x0001_gb|AAH59662.1| Poly A binding protein, cytoplasmic 1 b [Danio rerio]_x0001_gb|AAH63948.1| Poly A binding protein, cytoplasmic 1 b [Danio rerio]_x0001_emb|CAX14278.1| poly A binding protein, cytoplasmic 1 b [Danio rerio]_x0001_emb|CAX13648.1| poly A binding protein, cytoplasmic 1 b [Danio rerio]
CA345880.p.om.7	3	0.08	0.04	0.05	2	gb|ACN58609.1|	Cytoskeleton-associated protein 5 [Salmo salar]
CA350930.p.om.7	3	0.08	0.04	0.05	2	ref|NP_001134825.1|	Cytosolic sulfotransferase 3 [Salmo salar]_x0001_gb|ACI69056.1| Cytosolic sulfotransferase 3 [Salmo salar]
CA352306.p.om.7	3	0.08	0.04	0.05	2	gb|ACN60200.1|	Synaptophysin [Salmo salar]
CA353177.p.om.7	17	0.26	0.13	0.14	2	ref|NP_955925.1|	rac GTPase-activating protein 1 [Danio rerio]_x0001_gb|AAH63983.1| Rac GTPase-activating protein 1 [Danio rerio]
CA353271.p.om.7	197	10.52	5.26	5.26	2	gb|AAB53434.1|	Ikaros homolog [Oncorhynchus mykiss]
CA358189.p.om.7	14	0.48	0.24	0.24	2	gb|DAA27162.1|	ras GTPase-activating protein 1 [Bos taurus]
CA369230.p.om.7	14	0.24	0.12	0.12	2	ref|NP_001133696.1|	Sodium-dependent phosphate transporter 1-A [Salmo salar]_x0001_gb|ACI33715.1| Sodium-dependent phosphate transporter 1-A [Salmo salar]
CA369909.p.om.7	42	0.8	0.4	0.41	2	ref|NP_001025257.2|	DNA/RNA-binding protein KIN17 [Danio rerio]_x0001_gb|AAI09450.1| KIN, antigenic determinant of recA protein homolog (mouse) [Danio rerio]
CA376792.p.om.7	3	0.06	0.03	0.03	2	ref|NP_001137588.1|	carbonic anhydrase 6 [Sus scrofa]_x0001_dbj|BAH03533.1| carbonic anhydrase VI [Sus scrofa]
CA379102.p.om.7	3	0.04	0.02	0.02	2	gb|EU069828.1|	Oncorhynchus mykiss mitogen-activated protein kinase kinase kinase kinase 4-like protein gene, partial cds
CA383572.p.om.7	3	0.06	0.03	0.03	2	ref|NP_001118145.1|	sex hormone-binding globulin beta form [Oncorhynchus mykiss]_x0001_gb|ABQ45411.1| sex hormone-binding globulin beta form [Oncorhynchus mykiss]
CA385945.p.om.7	3	0.08	0.04	0.04	2	emb|CAK05120.1|	serologically defined colon cancer antigen 33 [Danio rerio]
CB490178.p.om.7	3	0.06	0.03	0.04	2	ref|NP_001080443.1|	acyl-CoA synthetase long-chain family member 1 [Xenopus laevis]_x0001_gb|AAH43756.1| Facl2-prov protein [Xenopus laevis]_x0001_gb|AAI08788.1| Facl2 protein [Xenopus laevis]
CB491416.p.om.7	3	0.06	0.03	0.04	2	ref|NP_001002671.1|	clarin-1 [Danio rerio]_x0001_gb|AAH76443.1| Clarin 1 [Danio rerio]_x0001_gb|AAI65064.1| Clrn1 protein [Danio rerio]
CR362832.p.om.7	14	0.5	0.25	0.25	2	gb|AY523945.1|	Dicentrarchus labrax clone DLA0178 microsatellite sequence
CT572409.p.om.7	3	0.08	0.04	0.05	2	gb|ACH85258.1|	chaperonin containing TCP1, subunit 3 [Salmo salar]
CU063667.p.om.7	50	1.22	0.61	0.61	2	ref|NP_001133495.1|	Ribonucleoside-diphosphate reductase subunit M2 [Salmo salar]_x0001_gb|ACI33346.1| Ribonucleoside-diphosphate reductase subunit M2 [Salmo salar]
CU066356.p.om.7	3	0.08	0.04	0.05	2	gb|ACN11471.1|	Nuclear pore glycoprotein p62 [Salmo salar]
CU066564.p.om.7	3	0.08	0.04	0.04	2	gb|AAK60620.1|AF356519_1	axonemal dynein heavy chain 8 [Homo sapiens]
CU067820.p.om.7	14	0.56	0.28	0.29	2	gb|AAP51056.1|	beta-2 microglobulin type 2 [Oncorhynchus mykiss]
CU072676.p.om.7	3	0.08	0.04	0.05	2	ref|XP_694281.4|	PREDICTED: ATPase, aminophospholipid transporter-like, class I, type 8A, member 2-like [Danio rerio]
GE834399.p.om.7	3	0.12	0.06	0.07	2	gb|ACI68298.1|	CD209 antigen-like protein D [Salmo salar]
CA343620.p.om.7	133	5.09	2.55	2.54	1.99608	gb|GU129139.1|	Salmo salar IgH locus A genomic sequence
CA357949.p.om.7	122	5.36	2.69	2.68	1.99257	gb|EF594310.1|	Astatotilapia burtoni clone BAC 170E12 Hoxba gene cluster, complete sequence

## Sheet: Poly (IC) - Table 1
SIGENAE Feature ID	# of Reads	polyIC Expression values	control Expression values	Expresssion Difference	Fold Change (Control/PolyIC)	Blast Accession #of best hit	Blast Gene Description of best hit
CU072702.p.om.7	30	1.37	0.05	1.31	27.4	ref|NP_001018610.2|	SWI/SNF-related, matrix-associated actin-dependent regulator of chromatin, subfamily a, containing DEAD/H box 1 [Danio rerio]
CA348003.p.om.7	21	1.07	0.06	1.01	17.8333	ref|NP_001117961.1|	CCL4 protein [Oncorhynchus mykiss]_x0001_gb|AAT76448.1| CCL4 [Oncorhynchus mykiss]_x0001_gb|ACO08368.1| Small inducible cytokine A3-like 1 precursor [Oncorhynchus mykiss]_x0001_gb|ACO08685.1| Small inducible cytokine A3-like 1 precursor [Oncorhynchus mykiss]
BX077208.p.om.7	19	0.99	0.06	0.93	16.5	gb|ACI66550.1|	Transcription elongation factor 1 homolog [Salmo salar]_x0001_gb|ACI69465.1| Transcription elongation factor 1 homolog [Salmo salar]_x0001_gb|ACO07642.1| Transcription elongation factor 1 homolog [Oncorhynchus mykiss]_x0001_gb|ACO09454.1| Transcription elongation factor 1 homolog [Osmerus mordax]
BX875699.p.om.7	19	1.07	0.07	1	15.2857	gb|EDM15772.1|	chromobox homolog 7, isoform CRA_b [Rattus norvegicus]
BX882925.p.om.7	17	0.72	0.05	0.67	14.4	ref|NP_001134277.1|	Vacuolar-sorting protein SNF8 [Salmo salar]_x0001_gb|ABW77483.1| EAP30 subunit of ELL complex a [Salmo salar]_x0001_gb|ACI66898.1| Vacuolar-sorting protein SNF8 [Salmo salar]
BX870813.p.om.7	17	0.99	0.07	0.92	14.1429	gb|ABM68965.1|	ZNF16 [Lemur catta]
CR369672.p.om.7	17	0.98	0.07	0.91	14	gb|BC054934.1|	Danio rerio ubiquitin specific peptidase 40, mRNA (cDNA clone IMAGE:2601403), partial cds
CX035199.p.om.7	17	1.23	0.09	1.14	13.6667	ref|NP_001080253.1|	PRP8 pre-mRNA processing factor 8 homolog [Xenopus laevis]_x0001_gb|AAH45266.1| Prp-8-prov protein [Xenopus laevis]
BX076476.p.om.7	16	0.8	0.06	0.74	13.3333	ref|NP_001135233.1|	Alpha-1,3-mannosyl-glycoprotein 2-beta-N-acetylglucosaminyltransferase [Salmo salar]_x0001_gb|ACI33639.1| Alpha-1,3-mannosyl-glycoprotein 2-beta-N-acetylglucosaminyltransferase [Salmo salar]
CA361950.p.om.7	33	2	0.15	1.86	13.3333	ref|NP_001133065.1|	eukaryotic translation initiation factor 4E type 3 [Salmo salar]_x0001_gb|ACH70623.1| eukaryotic translation initiation factor 4E family member 3 [Salmo salar]_x0001_gb|ACI68612.1| Eukaryotic translation initiation factor 4E type 3 [Salmo salar]_x0001_gb|ACN10257.1| Eukaryotic translation initiation factor 4E type 3 [Salmo salar]_x0001_gb|ACN12613.1| Eukaryotic translation initiation factor 4E ty…
BX303430.p.om.7	15	0.91	0.07	0.83	13	gb|AAW31810.1|	Esrom [Danio rerio]
CA374241.p.om.7	16	0.51	0.04	0.47	12.75	gb|ACN11298.1|	Rho-related GTP-binding protein RhoE precursor [Salmo salar]
BX300320.p.om.7	16	0.49	0.04	0.46	12.25	ref|NM_001038999.1|	Mus musculus ATPase, aminophospholipid transporter (APLT), class I, type 8A, member 1 (Atp8a1), transcript variant 1, mRNA
CU064262.p.om.7	14	1.54	0.13	1.41	11.8462	gb|ACI34200.1|	Guanine nucleotide-binding protein GI/GS/GT subunit beta-1 [Salmo salar]
BX314910.p.om.7	16	0.59	0.05	0.55	11.8	dbj|BAA86552.1|	KIAA1238 protein [Homo sapiens]
BX314900.p.om.7	42	2.21	0.19	2.02	11.6316	ref|XP_001848158.1|	methylglutaconyl-CoA hydratase, mitochondrial [Culex quinquefasciatus]_x0001_gb|EDS27752.1| methylglutaconyl-CoA hydratase, mitochondrial [Culex quinquefasciatus]
BX879419.p.om.7	14	0.68	0.06	0.62	11.3333	emb|CAM21946.1|	PDLIM1 interacting kinase 1 like [Mus musculus]
CA354466.p.om.7	13	1.01	0.09	0.91	11.2222	gb|EDL86937.1|	rCG50516, isoform CRA_c [Rattus norvegicus]
BX077510.p.om.7	14	0.67	0.06	0.61	11.1667	ref|NP_957209.1|	splicing factor 45 [Danio rerio]_x0001_gb|AAH45473.1| RNA binding motif protein 17 [Danio rerio]_x0001_emb|CAK04918.1| RNA binding motif protein 17 [Danio rerio]_x0001_gb|AAI64722.1| Rbm17 protein [Danio rerio]
CA367879.p.om.7	14	1	0.09	0.91	11.1111	ref|NP_001101631.1|	cartilage intermediate layer protein 1 [Rattus norvegicus]_x0001_gb|EDL95819.1| cartilage intermediate layer protein, nucleotide pyrophosphohydrolase (predicted) [Rattus norvegicus]
CA366274.p.om.7	14	0.88	0.08	0.81	11	gb|ACI03611.1|	dynein microtubule-binding domain (19:19) fused to seryl-tRNA synthase-monomer [synthetic construct]
CR375283.p.om.7	14	0.76	0.07	0.69	10.8571	ref|NP_001133548.1|	CAAX prenyl protease 1 homolog [Salmo salar]_x0001_gb|ACI33453.1| CAAX prenyl protease 1 homolog [Salmo salar]
CA345867.p.om.7	13	0.97	0.09	0.88	10.7778	gb|ACH70968.1|	proteasome (prosome, macropain) subunit, alpha type 6-2 [Salmo salar]
AY611483.p.om.7	14	0.43	0.04	0.4	10.75	gb|AAT45204.1|	nicotinic acetylcholine receptor alpha 9-III subunit [Oncorhynchus mykiss]
BX087255.p.om.7	13	0.96	0.09	0.87	10.6667	ref|NP_997963.1|	solute carrier family 2, facilitated glucose transporter member 8 [Danio rerio]_x0001_gb|AAH49409.1| Solute carrier family 2 (facilitated glucose transporter), member 8-like [Danio rerio]
CX041501.p.om.7	13	1.06	0.1	0.96	10.6	gb|AAH77205.1|	Kif21a protein [Xenopus laevis]
CA359337.p.om.7	13	0.74	0.07	0.67	10.5714	ref|NP_001133985.1|	Ribonucleoside-diphosphate reductase large subunit [Salmo salar]_x0001_gb|ACI34262.1| Ribonucleoside-diphosphate reductase large subunit [Salmo salar]_x0001_gb|ACN11136.1| Ribonucleoside-diphosphate reductase large subunit [Salmo salar]
CA348016.p.om.7	26	1.58	0.15	1.43	10.5333	ref|NP_001158783.1|	Heterogeneous nuclear ribonucleoprotein G [Salmo salar]_x0001_gb|ACN10450.1| Heterogeneous nuclear ribonucleoprotein G [Salmo salar]
CA375313.p.om.7	13	0.84	0.08	0.76	10.5	ref|NP_001002154.1|	AP-3 complex subunit mu-2 [Danio rerio]_x0001_gb|AAH71355.1| Adaptor-related protein complex 3, mu 2 subunit [Danio rerio]
CB491056.p.om.7	26	2.3	0.22	2.08	10.4545	gb|EDL03283.1|	threonyl-tRNA synthetase, isoform CRA_a [Mus musculus]
CA356678.p.om.7	88	2.81	0.27	2.54	10.4074	ref|NP_956302.1|	pancreatic progenitor cell differentiation and proliferation factor B [Danio rerio]_x0001_sp|Q6PBI2.1|PDPFB_DANRE RecName: Full=Pancreatic progenitor cell differentiation and proliferation factor B; AltName: Full=Exocrine differentiation and proliferation factor B_x0001_gb|AAH59699.1| C20orf149 homolog (H. sapiens), b [Danio rerio]
DV190775.p.om.7	12	0.52	0.05	0.46	10.4	ref|NP_001117908.1|	serum amyloid A [Oncorhynchus mykiss]_x0001_emb|CAM12347.1| serum amyloid A [Oncorhynchus mykiss]_x0001_emb|CAM12348.1| serum amyloid A [Oncorhynchus mykiss]
CA358442.p.om.7	25	1.96	0.19	1.77	10.3158	gb|ACI66375.1|	ATP synthase subunit e, mitochondrial [Salmo salar]_x0001_gb|ACI69788.1| ATP synthase subunit e, mitochondrial [Salmo salar]
CA381728.p.om.7	12	0.82	0.08	0.74	10.25	ref|NP_957231.1|	inhibitor of growth protein 3 [Danio rerio]_x0001_gb|AAQ98003.1| inhibitor of growth family, member 3 [Danio rerio]_x0001_emb|CAI11625.1| inhibitor of growth family, member 3 [Danio rerio]_x0001_emb|CAI21066.1| inhibitor of growth family, member 3 [Danio rerio]
CX039178.p.om.7	13	0.82	0.08	0.74	10.25	gb|ACI33196.1|	Signal recognition particle 54 kDa protein [Salmo salar]
BX299318.p.om.7	37	1.74	0.17	1.57	10.2353	gb|ACH70826.1|	ubiquitin-conjugating enzyme E2K [Salmo salar]_x0001_gb|ACI34037.1| Ubiquitin-conjugating enzyme E2 K [Salmo salar]
BX311503.p.om.7	12	0.51	0.05	0.45	10.2	gb|ADA84473.1|	retinitis pigmentosa GTPase regulator protein 2 1-17 isoform [Danio rerio]
CA368756.p.om.7	25	1.59	0.16	1.43	9.9375	gb|ACM09494.1|	Elongation factor 1-delta [Salmo salar]_x0001_gb|ACN09906.1| Elongation factor 1-delta [Salmo salar]_x0001_gb|ACN10124.1| Elongation factor 1-delta [Salmo salar]_x0001_gb|ACN12253.1| Elongation factor 1-delta [Salmo salar]_x0001_gb|ACN12475.1| Elongation factor 1-delta [Salmo salar]
CA352025.p.om.7	12	0.89	0.09	0.8	9.88889	ref|NP_001140120.1|	Zinc finger protein 391 [Salmo salar]_x0001_gb|ACM08258.1| Zinc finger protein 391 [Salmo salar]
CX029351.p.om.7	83	5.25	0.55	4.7	9.54545	gb|ACI33240.1|	NADH-cytochrome b5 reductase 3 [Salmo salar]
CU068236.p.om.7	11	0.57	0.06	0.51	9.5	gb|AAG09036.1|AF254087_1	EWS/ZSG fusion protein long A isoform [Homo sapiens]
CA376999.p.om.7	12	0.85	0.09	0.76	9.44444	ref|NP_598641.2|	platelet-activating factor acetylhydrolase 2, cytoplasmic [Mus musculus]
BX861610.p.om.7	12	0.66	0.07	0.59	9.42857	ref|NP_001133557.1|	Fatty acyl-CoA reductase 1 [Salmo salar]_x0001_gb|ACI33474.1| Fatty acyl-CoA reductase 1 [Salmo salar]
BX877984.p.om.7	11	0.56	0.06	0.5	9.33333	gb|ACQ58874.1|	Mitochondrial ornithine transporter 1 [Anoplopoma fimbria]
CX138092.p.om.7	586	40.92	4.39	36.53	9.32118	gb|ABA40770.1|	SJCHGC01393 protein [Schistosoma japonicum]
BX879463.p.om.7	23	1.77	0.19	1.58	9.31579	ref|NP_796182.2|	protein dopey-1 [Mus musculus]
CX249740.p.om.7	11	0.74	0.08	0.66	9.25	ref|NP_001157270.1|	isoleucyl-tRNA synthetase, mitochondrial [Danio rerio]
BX319919.p.om.7	23	1.38	0.15	1.23	9.2	gb|EDL80357.1|	rearranged L-myc fusion sequence (predicted) [Rattus norvegicus]
BX866330.p.om.7	67	3.63	0.4	3.22	9.075	ref|NP_001134001.1|	E3 ubiquitin-protein ligase RNF25 [Salmo salar]_x0001_gb|ACI34291.1| E3 ubiquitin-protein ligase RNF25 [Salmo salar]
BX309416.p.om.7	11	0.45	0.05	0.4	9	ref|NP_001135274.1|	Glutamate--cysteine ligase catalytic subunit [Salmo salar]_x0001_gb|ACI34124.1| Glutamate--cysteine ligase catalytic subunit [Salmo salar]
BX859188.p.om.7	11	1.16	0.13	1.03	8.92308	gb|AAH35816.1|	SUPT3H protein [Homo sapiens]
CB486573.p.om.7	11	1.96	0.22	1.74	8.90909	gb|ACJ02102.1|	SPATA5 [Salmo salar]
BX318643.p.om.7	11	1.24	0.14	1.1	8.85714	ref|NP_663382.2|	ubiquitin carboxyl-terminal hydrolase 19 isoform 5 [Mus musculus]
GE833252.p.om.7	11	0.53	0.06	0.47	8.83333	ref|NP_001140090.1|	Eukaryotic translation initiation factor 4E [Salmo salar]_x0001_gb|ACM09624.1| Eukaryotic translation initiation factor 4E [Salmo salar]
CU073350.p.om.7	12	0.44	0.05	0.4	8.8	ref|NP_998614.1|	serine/threonine-protein kinase PRP4 homolog [Danio rerio]_x0001_gb|AAH48879.1| PRP4 pre-mRNA processing factor 4 homolog B [Danio rerio]
BX302098.p.om.7	44	2.19	0.25	1.94	8.76	pdb|2NN6|G	Chain G, Structure Of The Human Rna Exosome Composed Of Rrp41, Rrp45, Rrp46, Rrp43, Mtr3, Rrp42, Csl4, Rrp4, And Rrp40
BX878085.p.om.7	11	0.61	0.07	0.55	8.71429	emb|CAP17279.1|	suppressor of cytokine signaling 7 [Oncorhynchus mykiss]
CX006182.p.om.7	11	0.69	0.08	0.61	8.625	gb|EDL30162.1|	KH domain containing, RNA binding, signal transduction associated 1 [Mus musculus]
BX862911.p.om.7	11	0.6	0.07	0.54	8.57143	ref|NP_001134267.1|	2-aminoethanethiol dioxygenase [Salmo salar]_x0001_gb|ACI66852.1| 2-aminoethanethiol dioxygenase [Salmo salar]
BX911062.p.om.7	10	0.51	0.06	0.45	8.5	ref|NP_990151.1|	zinc finger protein Aiolos [Gallus gallus]_x0001_emb|CAB56282.1| lymphoid transcription factor [Gallus gallus]
CA378018.p.om.7	11	0.34	0.04	0.31	8.5	gb|AAS57934.2|	source of immunodominant MHC-associated peptides [Ctenopharyngodon idella]_x0001_gb|ABQ51087.1| source of immunodominant MHC-associated peptides [Ctenopharyngodon idella]
CB496660.p.om.7	9	0.17	0.02	0.15	8.5	gb|ACH85357.1|	nebulin-like [Salmo salar]
CU071685.p.om.7	12	0.34	0.04	0.31	8.5	emb|CAI39581.1|	HECT, UBA and WWE domain containing 1 [Homo sapiens]_x0001_emb|CAI42656.1| HECT, UBA and WWE domain containing 1 [Homo sapiens]
BX876096.p.om.7	10	0.59	0.07	0.51	8.42857	ref|NP_001133638.1|	DNA primase large subunit [Salmo salar]_x0001_gb|ACI33620.1| DNA primase large subunit [Salmo salar]
CA370228.p.om.7	10	0.67	0.08	0.59	8.375	dbj|BAD92548.1|	nebulette non-muscle isoform variant [Homo sapiens]
GE836482.p.om.7	10	0.5	0.06	0.43	8.33333	ref|NP_001167238.1|	Sorting nexin-18 [Salmo salar]_x0001_gb|ACN11167.1| Sorting nexin-18 [Salmo salar]
BX299499.p.om.7	10	0.49	0.06	0.43	8.16667	ref|NP_001107066.1|	E3 ubiquitin-protein ligase TRIM32 [Danio rerio]_x0001_gb|AAI54642.1| Trim32 protein [Danio rerio]_x0001_gb|AAI71687.1| Tripartite motif-containing 32 [Danio rerio]_x0001_gb|AAI71691.1| Tripartite motif-containing 32 [Danio rerio]
BX862973.p.om.7	20	1.06	0.13	0.93	8.15385	gb|ACI33232.1|	Microtubule-associated proteins 1A/1B light chain 3B precursor [Salmo salar]
BX875199.p.om.7	2101	43.92	5.41	38.51	8.1183	gb|ACI34345.1|	CTP synthase 1 [Salmo salar]
AF223409.p.om.7	10	0.24	0.03	0.21	8	ref|NP_001117744.1|	Shaw-related potassium channel protein Raw1 [Oncorhynchus mykiss]_x0001_gb|AAF33249.1| Shaw-related potassium channel protein Raw1 [Oncorhynchus mykiss]
CA382478.p.om.7	10	0.72	0.09	0.63	8	ref|NM_001045191.2|	Danio rerio topoisomerase (DNA) II beta (top2b), mRNA
CR371562.p.om.7	10	1.12	0.14	0.98	8	gb|AAX26548.2|	SJCHGC07628 protein [Schistosoma japonicum]
BX310356.p.om.7	70	3.8	0.48	3.32	7.91667	gb|ACI33372.1|	Activator of 90 kDa heat shock protein ATPase homolog 1 [Salmo salar]
BX301822.p.om.7	10	0.55	0.07	0.48	7.85714	ref|NP_001135256.1|	guanine nucleotide-binding protein G(k) subunit alpha [Salmo salar]_x0001_gb|ACI33946.1| Guanine nucleotide-binding protein Gk subunit alpha [Salmo salar]
BX871477.p.om.7	59	3.13	0.4	2.73	7.825	ref|NP_001135086.1|	3-hydroxyacyl-CoA dehydrogenase type-2 [Salmo salar]_x0001_gb|ACI70101.1| 3-hydroxyacyl-CoA dehydrogenase type-2 [Salmo salar]_x0001_gb|ACI70145.1| 3-hydroxyacyl-CoA dehydrogenase type-2 [Salmo salar]
AF296368.p.om.7	10	0.39	0.05	0.34	7.8	gb|AAG02514.1|AF296368_1	MHC class I heavy chain [Oncorhynchus mykiss]
CX244673.p.om.7	29	1.95	0.25	1.69	7.8	gb|AAN17725.1|	metalloprotease [Mus musculus]
BX086548.p.om.7	9	0.31	0.04	0.27	7.75	gb|ACM08730.1|	BTB/POZ domain-containing protein KCTD17 [Salmo salar]
U20946.p.om.7	10	0.31	0.04	0.27	7.75	gb|AAA79132.1|	MHC class II beta chain [Oncorhynchus mykiss]
BX319137.p.om.7	29	1.47	0.19	1.28	7.73684	ref|NP_001133589.1|	Glia-derived nexin [Salmo salar]_x0001_gb|ACI33531.1| Glia-derived nexin precursor [Salmo salar]
CA349458.p.om.7	19	0.85	0.11	0.74	7.72727	ref|NP_001135350.1|	60S ribosomal protein L37 [Salmo salar]_x0001_gb|ACI68537.1| 60S ribosomal protein L37 [Salmo salar]_x0001_gb|ACN09977.1| 60S ribosomal protein L37 [Salmo salar]_x0001_gb|ACN12324.1| 60S ribosomal protein L37 [Salmo salar]
BX883665.p.om.7	10	0.54	0.07	0.47	7.71429	gb|AAH66556.1|	C20orf14 homolog (H. sapiens) [Danio rerio]
CA371275.p.om.7	19	1.31	0.17	1.13	7.70588	dbj|AK347734.1|	Sus scrofa mRNA, clone:OVR010084B03, expressed in ovary
CX261012.p.om.7	28	0.77	0.1	0.67	7.7	ref|NP_001155972.1|	gamma-parvin isoform 1 [Mus musculus]
AF099079.p.om.7	11	0.23	0.03	0.2	7.66667	gb|AAS92970.2|	estrogen receptor alpha [Oncorhynchus masou]
BX866547.p.om.7	9	0.46	0.06	0.39	7.66667	gb|ACI67704.1|	DCN1-like protein 1 [Salmo salar]
BX889423.p.om.7	9	0.46	0.06	0.39	7.66667	gb|EDL80443.1|	rCG30663 [Rattus norvegicus]
CR369907.p.om.7	19	2.21	0.29	1.91	7.62069	gb|EDM01947.1|	EMG1 nucleolar protein homolog (S. cerevisiae) (predicted), isoform CRA_a [Rattus norvegicus]
BX912847.p.om.7	9	0.38	0.05	0.33	7.6	ref|NP_001008733.1|	ADP-ribosylation factor-like protein 6 [Danio rerio]_x0001_gb|AAH86734.1| ADP-ribosylation factor-like 6 [Danio rerio]_x0001_gb|AAI65137.1| Arl6 protein [Danio rerio]_x0001_emb|CAX13374.1| ADP-ribosylation factor-like 6 [Danio rerio]
CX138305.p.om.7	57	3.64	0.48	3.16	7.58333	gb|ACN10637.1|	Trifunctional enzyme subunit beta, mitochondrial precursor [Salmo salar]
CR376157.p.om.7	10	0.53	0.07	0.46	7.57143	ref|NP_001075770.1|	phosphorylase b kinase regulatory subunit beta [Oryctolagus cuniculus]_x0001_gb|AAA31448.1| phosphorylase kinase beta-subunit [Oryctolagus cuniculus]
BX879443.p.om.7	9	0.45	0.06	0.38	7.5	gb|EDM04661.1|	rCG34344 [Rattus norvegicus]
BX883459.p.om.7	9	0.45	0.06	0.39	7.5	ref|NP_001100040.1|	PHD finger protein 19 [Rattus norvegicus]_x0001_gb|EDL93158.1| PHD finger protein 19 (predicted), isoform CRA_b [Rattus norvegicus]
CA344416.p.om.7	9	0.45	0.06	0.39	7.5	gb|AAI63627.1|	Mib2 protein [Danio rerio]_x0001_gb|AAI63626.1| Mib2 protein [Danio rerio]
CA357042.p.om.7	10	0.6	0.08	0.53	7.5	ref|NP_001008619.1|	probable 2-oxoglutarate dehydrogenase E1 component DHKTD1, mitochondrial [Danio rerio]_x0001_gb|AAH86742.1| Dehydrogenase E1 and transketolase domain containing 1 [Danio rerio]
BX909810.p.om.7	19	0.82	0.11	0.71	7.45455	gb|ACI66550.1|	Transcription elongation factor 1 homolog [Salmo salar]_x0001_gb|ACI69465.1| Transcription elongation factor 1 homolog [Salmo salar]_x0001_gb|ACO07642.1| Transcription elongation factor 1 homolog [Oncorhynchus mykiss]_x0001_gb|ACO09454.1| Transcription elongation factor 1 homolog [Osmerus mordax]
BX910674.p.om.7	9	0.67	0.09	0.57	7.44444	emb|CAG29192.1|	alpha-2,3-sialyltransferase [Takifugu rubripes]
CA362765.p.om.7	9	0.52	0.07	0.45	7.42857	ref|NP_001096649.1|	bromodomain and WD repeat-containing protein 1 isoform B [Mus musculus]
BX305270.p.om.7	10	0.37	0.05	0.32	7.4	gb|DAA17968.1|	peptidyl-prolyl cis-trans isomerase SDCCAG10 [Bos taurus]
CA344921.p.om.7	10	0.37	0.05	0.32	7.4	gb|ACM09025.1|	Transgelin [Salmo salar]
CA350350.p.om.7	9	0.22	0.03	0.19	7.33333	gb|ACN10562.1|	Ezrin-radixin-moesin-binding phosphoprotein 50 [Salmo salar]
CU072080.p.om.7	18	0.51	0.07	0.44	7.28571	ref|NP_001108153.2|	cleavage and polyadenylation specificity factor subunit 1 [Danio rerio]
BX314163.p.om.7	9	0.58	0.08	0.5	7.25	ref|NP_958881.1|	solute carrier family 26, member 5 [Danio rerio]_x0001_gb|AAH54604.1| Solute carrier family 26, member 5 [Danio rerio]_x0001_emb|CAI20759.1| prestin [Danio rerio]
CA345984.p.om.7	27	1.44	0.2	1.24	7.2	ref|NP_001117650.1|	tFZR1 [Oncorhynchus mykiss]_x0001_dbj|BAA25269.1| tFZR1 [Oncorhynchus mykiss]
CA354050.p.om.7	9	0.5	0.07	0.43	7.14286	gb|AAI63526.1|	Ptpra protein [Danio rerio]
BX304199.p.om.7	45	2.19	0.31	1.89	7.06452	gb|ACI33944.1|	F-actin-capping protein subunit beta [Salmo salar]_x0001_gb|ACN10552.1| F-actin-capping protein subunit beta [Salmo salar]
BX086325.p.om.7	26	1.05	0.15	0.9	7	gb|AAH02582.2|	Ubiquitin protein ligase E3A [Homo sapiens]
CU072105.p.om.7	9	0.28	0.04	0.24	7	gb|AAH25109.1|	Mina protein [Mus musculus]_x0001_gb|AAH23462.1| Myc induced nuclear antigen [Mus musculus]
BX311717.p.om.7	9	0.35	0.05	0.3	7	gb|ACI68071.1|	Triosephosphate isomerase [Salmo salar]
BX312298.p.om.7	9	0.35	0.05	0.3	7	ref|NP_001134627.1|	Cyclin-dependent kinase 2-interacting protein [Salmo salar]_x0001_gb|ACI68261.1| Cyclin-dependent kinase 2-interacting protein [Salmo salar]
BX860327.p.om.7	9	0.49	0.07	0.42	7	gb|AAH45434.1|	Plk4 protein [Danio rerio]
BX878245.p.om.7	26	1.32	0.19	1.12	6.94737	ref|NP_001032540.1|	NEDD4-like E3 ubiquitin-protein ligase WWP1 [Bos taurus]_x0001_gb|AAI08131.1| WW domain containing E3 ubiquitin protein ligase 1 [Bos taurus]_x0001_gb|DAA22528.1| WW domain containing E3 ubiquitin protein ligase 1 [Bos taurus]
CX254514.p.om.7	53	3.33	0.48	2.85	6.9375	gb|ACO14346.1|	Ubiquitin-conjugating enzyme E2 G1 [Esox lucius]
CX717788.p.om.7	9	0.55	0.08	0.47	6.875	ref|NP_009065.1|	zinc finger protein 135 isoform 1 [Homo sapiens]
GE823136.p.om.7	17	0.55	0.08	0.47	6.875	ref|NM_182703.3|	Homo sapiens ankyrin repeat and death domain containing 1A (ANKDD1A), mRNA
BX299417.p.om.7	26	1.92	0.28	1.63	6.85714	ref|NP_001166035.1|	euchromatic histone-lysine N-methyltransferase 1b [Danio rerio]
CA386242.p.om.7	9	0.48	0.07	0.41	6.85714	ref|NP_998543.1|	secretory carrier membrane protein 2 isoform 1 [Danio rerio]_x0001_gb|AAH46051.1| Secretory carrier membrane protein 2 [Danio rerio]
CX248582.p.om.7	9	0.75	0.11	0.65	6.81818	ref|NP_001082100.1|	p21-activated kinase 5 [Xenopus laevis]_x0001_gb|AAH87332.1| PAK5 protein [Xenopus laevis]
BX303959.p.om.7	44	2.18	0.32	1.87	6.8125	ref|NP_001134240.1|	protein SEC13 homolog [Salmo salar]_x0001_gb|ACI66750.1| SEC13 homolog [Salmo salar]
CB489409.p.om.7	9	0.68	0.1	0.58	6.8	gb|ACM08874.1|	Mediator of RNA polymerase II transcription subunit 30 [Salmo salar]
BX882606.p.om.7	17	0.88	0.13	0.75	6.76923	gb|ABF20544.1|	transposase [Aedes aegypti]
CU063401.p.om.7	8	0.27	0.04	0.23	6.75	gb|ACN10094.1|	ADRM1 [Salmo salar]_x0001_gb|ACN12442.1| ADRM1 [Salmo salar]
CX042498.p.om.7	9	0.54	0.08	0.46	6.75	ref|NP_001038102.1|	cytospin-A [Gallus gallus]_x0001_gb|AAX84189.1| cytospin A [Gallus gallus]
BX076841.p.om.7	8	0.4	0.06	0.34	6.66667	gb|AAF63414.1|AF142419_1	QUAKING isoform 6 [Homo sapiens]
BX296731.p.om.7	8	0.4	0.06	0.33	6.66667	ref|NP_001139986.1|	SUMO-activating enzyme subunit 1 [Salmo salar]_x0001_gb|ACM09034.1| SUMO-activating enzyme subunit 1 [Salmo salar]
BX310197.p.om.7	8	0.4	0.06	0.34	6.66667	ref|NP_001134825.1|	Cytosolic sulfotransferase 3 [Salmo salar]_x0001_gb|ACI69056.1| Cytosolic sulfotransferase 3 [Salmo salar]
BX889721.p.om.7	8	0.4	0.06	0.33	6.66667	gb|EU481821.1|	Salmo salar physical map contig 483, genomic sequence
CA372355.p.om.7	16	0.4	0.06	0.33	6.66667	ref|NP_001170805.1|	UDP glucuronosyltransferase 1 family, polypeptide A7 [Danio rerio]_x0001_gb|ADC91929.1| UDP glucuronosyltransferase 1 family polypeptide a7 isoform 1 [Danio rerio]
CU073837.p.om.7	8	0.4	0.06	0.33	6.66667	ref|NP_001136192.1|	RNA polymerase II subunit A C-terminal domain phosphatase SSU72 [Salmo salar]_x0001_gb|ACI69985.1| RNA polymerase II subunit A C-terminal domain phosphatase SSU72 [Salmo salar]
BX882710.p.om.7	17	1.06	0.16	0.9	6.625	gb|AAI54329.1|	Hnrnpl protein [Danio rerio]
CR371900.p.om.7	8	0.46	0.07	0.38	6.57143	gb|AAD03794.1|	Tc1-like transposase [Anopheles gambiae]
CU074006.p.om.7	108	3.14	0.48	2.65	6.54167	gb|ACO08109.1|	AP-2 complex subunit mu-1 [Oncorhynchus mykiss]
BX865389.p.om.7	9	0.26	0.04	0.22	6.5	ref|NP_001135259.1|	Lamina-associated polypeptide 2 isoform beta [Salmo salar]_x0001_gb|ACI33979.1| Lamina-associated polypeptide 2 isoform beta [Salmo salar]
CA342425.p.om.7	9	0.26	0.04	0.22	6.5	emb|CR353986.1|	Gallus gallus finished cDNA, clone ChEST100n1
CA347017.p.om.7	8	0.13	0.02	0.11	6.5	ref|NP_001108065.1|	kinesin-like protein KIF2C [Danio rerio]_x0001_gb|AAI55586.1| Si:ch211-61f14.1 protein [Danio rerio]
CB488326.p.om.7	8	0.26	0.04	0.22	6.5	ref|NP_001134410.1|	Cyclin-dependent kinase 2-associated protein 1 [Salmo salar]_x0001_gb|ACI67406.1| Cyclin-dependent kinase 2-associated protein 1 [Salmo salar]
CU066560.p.om.7	8	0.26	0.04	0.22	6.5	ref|NP_001134705.1|	peptidylprolyl isomerase H [Salmo salar]_x0001_gb|ACI66184.1| Peptidyl-prolyl cis-trans isomerase H [Salmo salar]_x0001_gb|ACI68540.1| Peptidyl-prolyl cis-trans isomerase H [Salmo salar]
CX260043.p.om.7	33	1.87	0.29	1.58	6.44828	emb|CAM27169.1|	novel KRAB box and zinc finger, C2H2 type domain containing protein [Mus musculus]_x0001_emb|CAM18185.1| novel KRAB box and zinc finger, C2H2 type domain containing protein [Mus musculus]
CA356232.p.om.7	8	0.45	0.07	0.38	6.42857	gb|AAS75798.1|	cryopyrin [Dasypus novemcinctus]
CA380638.p.om.7	8	0.45	0.07	0.38	6.42857	gb|BC082532.1|	Xenopus laevis cDNA clone IMAGE:6959183
BX311702.p.om.7	49	2.31	0.36	1.95	6.41667	ref|NP_001038870.1|	ribonuclease kappa-A [Danio rerio]_x0001_sp|Q0P467.1|RNKA_DANRE RecName: Full=Ribonuclease kappa-A; Short=RNase kappa-A; Short=RNase K-A_x0001_gb|AAI22251.1| Ribonuclease, RNase K a [Danio rerio]
BX314893.p.om.7	17	0.77	0.12	0.65	6.41667	gb|AAH01404.2|	SEC16A protein [Homo sapiens]
CT564752.p.om.7	9	0.32	0.05	0.28	6.4	ref|NP_001003882.1|	seryl-tRNA synthetase, cytoplasmic [Danio rerio]_x0001_gb|AAT68157.1| seryl-tRNA synthetase [Danio rerio]_x0001_gb|AAH81608.1| Seryl-tRNA synthetase [Danio rerio]_x0001_dbj|BAI44434.1| seryl-tRNA synthetase [Danio rerio]
CX033248.p.om.7	8	0.64	0.1	0.54	6.4	gb|EAW47692.1|	T-cell lymphoma invasion and metastasis 2, isoform CRA_a [Homo sapiens]
CX035145.p.om.7	49	4.15	0.65	3.5	6.38462	gb|ACN10942.1|	Serine/arginine repetitive matrix protein 1 [Salmo salar]
CA373359.p.om.7	8	0.51	0.08	0.43	6.375	gb|ACN10977.1|	Epididymis-specific alpha-mannosidase precursor [Salmo salar]
CA383996.p.om.7	16	1.02	0.16	0.86	6.375	ref|NP_001112370.1|	glutamyl-tRNA(Gln) amidotransferase subunit A homolog [Danio rerio]
CR369443.p.om.7	8	0.51	0.08	0.43	6.375	ref|NP_571580.1|	caspase a [Danio rerio]_x0001_gb|AAF66964.1|AF233434_1 caspase [Danio rerio]_x0001_gb|AAH95022.1| Caspase a [Danio rerio]_x0001_emb|CAP09499.1| caspase a [Danio rerio]_x0001_gb|AAI64780.1| Caspa protein [Danio rerio]
CX039041.p.om.7	8	0.51	0.08	0.43	6.375	gb|ACO09021.1|	TIM21-like protein, mitochondrial precursor [Osmerus mordax]
CA387533.p.om.7	16	0.7	0.11	0.59	6.36364	ref|NP_835234.2|	selenoprotein H [Danio rerio]
BX311808.p.om.7	25	1.08	0.17	0.92	6.35294	ref|NP_001134462.1|	transcription factor-like 1 [Salmo salar]_x0001_gb|ACI67632.1| Vacuolar protein sorting-associated protein 72 homolog [Salmo salar]
BX878096.p.om.7	8	0.38	0.06	0.32	6.33333	ref|NP_956522.1|	peroxisomal biogenesis factor 3 [Danio rerio]_x0001_gb|AAH46066.1| Peroxisomal biogenesis factor 3 [Danio rerio]
CA346621.p.om.7	24	1.33	0.21	1.12	6.33333	ref|NP_001134023.1|	cleavage and polyadenylation specificity factor subunit 2 [Salmo salar]_x0001_gb|ACI34329.1| Cleavage and polyadenylation specificity factor subunit 2 [Salmo salar]
CN210921.p.om.7	32	2.64	0.42	2.21	6.28571	gb|ACN10092.1|	Cytochrome b-c1 complex subunit 2, mitochondrial precursor [Salmo salar]_x0001_gb|ACN12439.1| Cytochrome b-c1 complex subunit 2, mitochondrial precursor [Salmo salar]
BX311243.p.om.7	8	0.44	0.07	0.37	6.28571	ref|NP_001134466.1|	DNA-directed RNA polymerase III subunit RPC8 [Salmo salar]_x0001_gb|ACI67638.1| DNA-directed RNA polymerase III subunit RPC8 [Salmo salar]
CA363647.p.om.7	8	0.44	0.07	0.37	6.28571	ref|NP_001156985.1|	discs large homolog 5 isoform 1 [Mus musculus]
BX301252.p.om.7	8	0.75	0.12	0.63	6.25	ref|NP_001164822.1|	POZ-, AT hook-, and zinc finger-containing protein 1 [Oryctolagus cuniculus]_x0001_gb|ACK44248.1| POZ and AT hook containing zinc finger 1 long C isoform (predicted) [Oryctolagus cuniculus]
CA366592.p.om.7	8	0.5	0.08	0.42	6.25	ref|NP_001100987.1|	cytoplasmic FMR1 interacting protein 1 [Rattus norvegicus]_x0001_gb|EDL86460.1| cytoplasmic FMR1 interacting protein 1 (predicted) [Rattus norvegicus]
BX297224.p.om.7	24	2.18	0.35	1.83	6.22857	ref|NP_001158805.1|	Anaphase-promoting complex subunit 5 [Salmo salar]_x0001_gb|ACN10505.1| Anaphase-promoting complex subunit 5 [Salmo salar]
CA348458.p.om.7	16	0.87	0.14	0.73	6.21429	ref|NP_001120660.1|	zinc finger protein 534 [Mus musculus]_x0001_emb|CAM19624.2| novel KRAB box domain containing protein [Mus musculus]
CA347356.p.om.7	16	0.31	0.05	0.26	6.2	gb|AAY81989.1|	glycogen phosphorylase [Oreochromis mossambicus]
CA371906.p.om.7	8	0.31	0.05	0.26	6.2	gb|AAH47018.1|	CTBP2 protein [Homo sapiens]
CA362698.p.om.7	8	0.68	0.11	0.57	6.18182	emb|CAQ14903.1|	rp42 homolog (pending) [Danio rerio]
BX321042.p.om.7	79	2.53	0.41	2.12	6.17073	ref|NP_999860.1|	metastasis-associated protein MTA2 [Danio rerio]_x0001_gb|AAH55273.1| Metastasis associated 1 family, member 2 [Danio rerio]
BX866492.p.om.7	8	0.37	0.06	0.31	6.16667	ref|NP_001002588.1|	translocation protein SEC63 homolog [Danio rerio]_x0001_gb|AAH76198.1| SEC63-like (S. cerevisiae) [Danio rerio]
BX882425.p.om.7	8	0.37	0.06	0.31	6.16667	gb|ACI68798.1|	Thioredoxin domain-containing protein 9 [Salmo salar]
BX085915.p.om.7	8	0.43	0.07	0.36	6.14286	ref|NP_001134705.1|	peptidylprolyl isomerase H [Salmo salar]_x0001_gb|ACI66184.1| Peptidyl-prolyl cis-trans isomerase H [Salmo salar]_x0001_gb|ACI68540.1| Peptidyl-prolyl cis-trans isomerase H [Salmo salar]
BX298631.p.om.7	8	0.43	0.07	0.36	6.14286	ref|NP_001099984.1|	DNA replication licensing factor MCM8 [Rattus norvegicus]_x0001_gb|EDL80275.1| minichromosome maintenance deficient 8 (S. cerevisiae) (predicted) [Rattus norvegicus]
CX034665.p.om.7	8	0.49	0.08	0.41	6.125	gb|EDM03612.1|	solute carrier family 38, member 6 [Rattus norvegicus]
CR369313.p.om.7	24	1.16	0.19	0.97	6.10526	gb|ACO14396.1|	Rab-like protein 3 [Esox lucius]
BX072739.p.om.7	24	1.22	0.2	1.02	6.1	ref|NP_001133253.1|	Potassium channel subfamily K member 6 [Salmo salar]_x0001_gb|ACI32908.1| Potassium channel subfamily K member 6 [Salmo salar]
CU066611.p.om.7	23	0.73	0.12	0.61	6.08333	gb|ACO09674.1|	dTDP-D-glucose 4,6-dehydratase [Osmerus mordax]
CA358114.p.om.7	8	0.54	0.09	0.45	6	gb|BC003374.1|	Mus musculus jumonji, AT rich interactive domain 2, mRNA (cDNA clone IMAGE:3589616), partial cds
AB008373.p.om.7	7	0.06	0.01	0.05	6	dbj|BAA33380.1|	alpha 1 type I collagen [Oncorhynchus mykiss]
BX086988.p.om.7	8	0.36	0.06	0.3	6	emb|CAM21132.1|	novel KRAB box and zinc finger, C2H2 type domain containing protein [Mus musculus]
BX303085.p.om.7	23	1.62	0.27	1.34	6	ref|NP_956084.1|	RNA binding motif protein 25 [Danio rerio]_x0001_gb|AAH45992.1| RNA binding motif protein 25 [Danio rerio]
CA346699.p.om.7	7	0.12	0.02	0.1	6	ref|NP_001133897.1|	Serine protease 23 [Salmo salar]_x0001_gb|ACI34102.1| Serine protease 23 precursor [Salmo salar]
CA382767.p.om.7	8	0.24	0.04	0.21	6	pir||I50116	N-cadherin precursor - zebra fish_x0001_emb|CAA47890.1| N-cadherin precursor [Danio rerio]
BX298045.p.om.7	8	0.6	0.1	0.51	6	ref|NP_034759.1|	kinesin-associated protein 3 [Mus musculus]_x0001_dbj|BAA08902.1| KAP3B [Mus musculus]_x0001_gb|AAH40362.1| Kinesin-associated protein 3 [Mus musculus]
BX880113.p.om.7	8	0.42	0.07	0.35	6	gb|ACI67493.1|	Mitochondrial import receptor subunit TOM40 homolog [Salmo salar]
CA368352.p.om.7	8	0.42	0.07	0.35	6	gb|AAI39586.1|	Tom1 protein [Danio rerio]
CX145436.p.om.7	31	1.38	0.23	1.15	6	gb|DAA22818.1|	arf-GAP with SH3 domain, ANK repeat and PH domain-containing protein 1 [Bos taurus]
CX042937.p.om.7	23	1.49	0.25	1.24	5.96	ref|NP_001073432.1|	vascular endothelial zinc finger 1 [Danio rerio]_x0001_gb|AAI22298.1| Vascular endothelial zinc finger 1 [Danio rerio]_x0001_gb|AAI65591.1| Vezf1 protein [Danio rerio]
CR372839.p.om.7	23	1.19	0.2	0.99	5.95	emb|CAG12531.1|	unnamed protein product [Tetraodon nigroviridis]
BX311978.p.om.7	23	1.07	0.18	0.89	5.94444	gb|ACI67140.1|	Non-structural maintenance of chromosomes element 1 homolog [Salmo salar]
BX880360.p.om.7	15	0.89	0.15	0.74	5.93333	gb|ACN10977.1|	Epididymis-specific alpha-mannosidase precursor [Salmo salar]
CX036535.p.om.7	15	0.94	0.16	0.78	5.875	ref|NP_659038.2|	PR domain containing 15 [Mus musculus]
CR374578.p.om.7	8	0.41	0.07	0.34	5.85714	ref|NP_001133328.1|	Acyl-coenzyme A thioesterase 5 [Salmo salar]_x0001_gb|ACI33037.1| Acyl-coenzyme A thioesterase 5 [Salmo salar]
GE841041.p.om.7	15	0.76	0.13	0.63	5.84615	ref|YP_003021973.1|	RNA-binding protein [Geobacter sp. M21]_x0001_gb|ACT18215.1| RNA-binding protein [Geobacter sp. M21]
CA371778.p.om.7	38	2.39	0.41	1.98	5.82927	gb|AAO37090.1|	amino acid transport protein [Mus musculus]
BX304929.p.om.7	23	0.87	0.15	0.73	5.8	gb|ACO07928.1|	Ran-specific GTPase-activating protein [Oncorhynchus mykiss]
BX318446.p.om.7	7	0.29	0.05	0.23	5.8	ref|NM_001108512.1|	Rattus norvegicus suppressor of variegation 4-20 homolog 1 (Drosophila) (Suv420h1), mRNA
DV202602.p.om.7	15	1.1	0.19	0.91	5.78947	gb|ACI69152.1|	THO complex subunit 4 [Salmo salar]_x0001_gb|ACN10561.1| THO complex subunit 4 [Salmo salar]
CX253924.p.om.7	30	1.79	0.31	1.48	5.77419	gb|AAB53433.1|	Ikaros homolog [Oncorhynchus mykiss]
CU062670.p.om.7	7	0.23	0.04	0.19	5.75	ref|NP_001122182.1|	peroxisomal leader peptide-processing protease [Danio rerio]_x0001_gb|AAI62169.1| Trypsin domain containing 1 [Danio rerio]_x0001_emb|CAX14791.1| trypsin domain containing 1 [Danio rerio]
CU065187.p.om.7	7	0.23	0.04	0.19	5.75	ref|NP_001093793.1|	kinetochore-associated protein DSN1 homolog [Bos taurus]_x0001_gb|AAI49693.1| DSN1 protein [Bos taurus]_x0001_gb|DAA23188.1| DSN1, MIND kinetochore complex component, homolog [Bos taurus]
BX884235.p.om.7	30	1.49	0.26	1.23	5.73077	ref|NP_001135254.1|	Zinc finger protein ZFMSA12A [Salmo salar]_x0001_gb|ACI33914.1| Zinc finger protein ZFMSA12A [Salmo salar]
BX084630.p.om.7	30	1.43	0.25	1.18	5.72	gb|ACI33930.1|	NADH-ubiquinone oxidoreductase 75 kDa subunit, mitochondrial precursor [Salmo salar]
BX087771.p.om.7	15	0.8	0.14	0.66	5.71429	gb|ACN10195.1|	Alcohol dehydrogenase [Salmo salar]_x0001_gb|ACN12549.1| Alcohol dehydrogenase [Salmo salar]
BX910925.p.om.7	44	2.1	0.37	1.73	5.67568	ref|NP_991164.1|	zinc finger protein Pegasus [Danio rerio]_x0001_gb|AAQ94558.1| zinc finger protein subfamily 1A 5 [Danio rerio]_x0001_tpe|CAQ76707.1| TPA: Pegasus protein [Danio rerio]
BX085547.p.om.7	8	0.17	0.03	0.14	5.66667	dbj|BAI47561.1|	collagen type VI alpha 1 subunit [Mesocricetus auratus]
BX087824.p.om.7	15	0.85	0.15	0.7	5.66667	gb|ACO08687.1|	Histone H5A [Oncorhynchus mykiss]
BX883985.p.om.7	7	0.34	0.06	0.28	5.66667	ref|NP_001116759.1|	rab GTPase-binding effector protein 1 [Danio rerio]_x0001_gb|ABW96886.1| Rabaptin-5 [Danio rerio]
CA344819.p.om.7	7	0.17	0.03	0.14	5.66667	gb|ACN10664.1|	High affinity immunoglobulin gamma Fc receptor I precursor [Salmo salar]
CA364430.p.om.7	8	0.34	0.06	0.29	5.66667	gb|ACI69403.1|	Caspase-1 precursor [Salmo salar]
CA381081.p.om.7	14	0.17	0.03	0.14	5.66667	ref|NP_001118097.1|	c-x-c chemokine receptor type 3A isoform 1 [Oncorhynchus mykiss]_x0001_emb|CAI61936.1| c-x-c chemokine receptor type 3A, variant 1 [Oncorhynchus mykiss]
CX147993.p.om.7	15	0.96	0.17	0.8	5.64706	ref|NP_001006829.1|	coenzyme Q6 homolog, monooxygenase [Xenopus (Silurana) tropicalis]_x0001_gb|AAH76897.1| coenzyme Q6 homolog (yeast) [Xenopus (Silurana) tropicalis]_x0001_emb|CAJ83665.1| coenzyme Q6 homolog (yeast) [Xenopus tropicalis]
CA353743.p.om.7	7	0.28	0.05	0.23	5.6	ref|NP_001009587.1|	protocadherin 2 alpha a 3 [Danio rerio]_x0001_dbj|BAD60793.1| protocadherin1-alpha-av3 [Danio rerio]
BX875529.p.om.7	7	0.39	0.07	0.32	5.57143	ref|NP_998080.1|	spastin [Danio rerio]_x0001_gb|AAH67715.1| Spastin [Danio rerio]
CA375720.p.om.7	14	0.39	0.07	0.32	5.57143	gb|AAI08346.1|	6330416L07Rik protein [Mus musculus]
CU069177.p.om.7	7	0.39	0.07	0.32	5.57143	ref|NP_001133236.1|	ATP-dependent RNA helicase DDX51 [Salmo salar]_x0001_gb|ACI32879.1| ATP-dependent RNA helicase DDX51 [Salmo salar]
CA367972.p.om.7	22	1.55	0.28	1.27	5.53571	ref|NP_998865.1|	RNA binding motif protein 25 [Xenopus (Silurana) tropicalis]_x0001_gb|AAH67922.1| RNA binding motif protein 25 [Xenopus (Silurana) tropicalis]
BX077418.p.om.7	7	0.33	0.06	0.26	5.5	gb|AAH46061.1|	Ribonuclease H2, subunit A [Danio rerio]
BX085482.p.om.7	14	0.66	0.12	0.54	5.5	ref|NP_001167229.1|	Glycerol kinase, testis specific 1 [Salmo salar]_x0001_gb|ACN11143.1| Glycerol kinase, testis specific 1 [Salmo salar]
BX299011.p.om.7	7	0.33	0.06	0.26	5.5	gb|AAI08353.1|	OTTMUSG00000010694 protein [Mus musculus]
BX304705.p.om.7	7	0.33	0.06	0.27	5.5	ref|NP_001092410.1|	nucleoporin NUP53 [Bos taurus]_x0001_gb|AAI42123.1| NUP35 protein [Bos taurus]_x0001_gb|DAA32823.1| nucleoporin 35kDa [Bos taurus]
BX909570.p.om.7	7	0.33	0.06	0.27	5.5	gb|ACN10977.1|	Epididymis-specific alpha-mannosidase precursor [Salmo salar]
BX909635.p.om.7	7	0.33	0.06	0.27	5.5	ref|NM_001123274.1|	Danio rerio si:dkey-45m5.4 (si:dkey-45m5.4), mRNA
AF439404.p.om.7	7	0.11	0.02	0.09	5.5	ref|NP_001117798.1|	luteinizing hormone receptor [Oncorhynchus mykiss]_x0001_gb|AAQ04550.1|AF439404_1 luteinizing hormone receptor LHR [Oncorhynchus mykiss]
BG360545.p.om.7	7	0.77	0.14	0.62	5.5	gb|AAH73136.1|	AGPAT9 protein [Homo sapiens]
CA369533.p.om.7	8	0.22	0.04	0.18	5.5	ref|XP_002665081.1|	PREDICTED: hypothetical protein [Danio rerio]
CU065729.p.om.7	22	0.99	0.18	0.82	5.5	ref|NP_998081.1|	p66 alpha [Danio rerio]_x0001_gb|AAH67707.1| GATA zinc finger domain containing 2A [Danio rerio]
CU071313.p.om.7	7	0.22	0.04	0.18	5.5	ref|NP_001116399.1|	protein arginine methyltransferase 5 [Oryzias latipes]_x0001_gb|ABZ90976.1| PRMT5 [Oryzias latipes]
BX877890.p.om.7	22	1.04	0.19	0.86	5.47368	ref|NP_001133521.1|	dyskerin [Salmo salar]_x0001_gb|ACI33401.1| H/ACA ribonucleoprotein complex subunit 4 [Salmo salar]
BX307211.p.om.7	29	1.42	0.26	1.16	5.46154	ref|NP_001117765.1|	interferon regulatory factor 1 [Oncorhynchus mykiss]_x0001_gb|AAM77843.1|AF332147_1 interferon regulatory factor 1 [Oncorhynchus mykiss]
BX313315.p.om.7	14	0.71	0.13	0.57	5.46154	ref|NP_001004874.1|	RAN binding protein 3 [Xenopus (Silurana) tropicalis]_x0001_gb|AAH75117.1| RAN binding protein 3 [Xenopus (Silurana) tropicalis]_x0001_emb|CAJ81733.1| RAN binding protein 3 [Xenopus tropicalis]
CX043034.p.om.7	7	0.49	0.09	0.4	5.44444	emb|CAH72219.1|	peroxisome proliferator-activated receptor gamma, coactivator-related 1 [Homo sapiens]
CX143327.p.om.7	7	0.49	0.09	0.4	5.44444	gb|EDL76734.1|	dopey family member 2 (predicted), isoform CRA_a [Rattus norvegicus]
BX300627.p.om.7	7	0.38	0.07	0.31	5.42857	ref|NP_001134769.1|	Transcription initiation factor IIB [Salmo salar]_x0001_gb|ACI68803.1| Transcription initiation factor IIB [Salmo salar]
BX876360.p.om.7	7	0.38	0.07	0.31	5.42857	gb|ACO09829.1|	Interferon-stimulated 20 kDa exonuclease-like 2 [Osmerus mordax]
CA378103.p.om.7	7	0.38	0.07	0.31	5.42857	gb|AAM21123.1|AF498976_1	small GTP binding protein TC10 [Homo sapiens]_x0001_gb|AAA36547.1| ras-like protein [Homo sapiens]
BX310782.p.om.7	7	0.27	0.05	0.22	5.4	gb|ACO08005.1|	60S ribosomal protein L9 [Oncorhynchus mykiss]
CA372848.p.om.7	14	0.81	0.15	0.66	5.4	pdb|1MX6|A	Chain A, Structure Of P18ink4c (F92n)_x0001_pdb|1MX6|B Chain B, Structure Of P18ink4c (F92n)
CU066709.p.om.7	28	1.08	0.2	0.88	5.4	gb|AAH44541.1|	DEAD/H (Asp-Glu-Ala-Asp/His) box polypeptide 19 (DBP5 homolog, yeast) [Danio rerio]
CU071119.p.om.7	7	0.27	0.05	0.22	5.4	emb|CAG00897.1|	unnamed protein product [Tetraodon nigroviridis]
BX887455.p.om.7	7	0.43	0.08	0.35	5.375	ref|NP_998614.1|	serine/threonine-protein kinase PRP4 homolog [Danio rerio]_x0001_gb|AAH48879.1| PRP4 pre-mRNA processing factor 4 homolog B [Danio rerio]
BX867855.p.om.7	35	1.77	0.33	1.44	5.36364	gb|ACO07781.1|	ATP11, mitochondrial precursor [Oncorhynchus mykiss]
CX025610.p.om.7	21	1.66	0.31	1.35	5.35484	ref|NP_001133557.1|	Fatty acyl-CoA reductase 1 [Salmo salar]_x0001_gb|ACI33474.1| Fatty acyl-CoA reductase 1 [Salmo salar]
CA379918.p.om.7	28	1.82	0.34	1.48	5.35294	gb|ACO09054.1|	Cornichon homolog [Osmerus mordax]
BX299229.p.om.7	7	0.32	0.06	0.26	5.33333	ref|NP_001107066.1|	E3 ubiquitin-protein ligase TRIM32 [Danio rerio]_x0001_gb|AAI54642.1| Trim32 protein [Danio rerio]_x0001_gb|AAI71687.1| Tripartite motif-containing 32 [Danio rerio]_x0001_gb|AAI71691.1| Tripartite motif-containing 32 [Danio rerio]
BX308721.p.om.7	7	0.32	0.06	0.26	5.33333	ref|NP_001133109.1|	zinc finger matrin-type protein 5 [Salmo salar]_x0001_gb|ACH70705.1| zinc finger matrin type 5 [Salmo salar]_x0001_gb|ACI66837.1| Zinc finger matrin-type protein 5 [Salmo salar]_x0001_gb|ACN10156.1| Zinc finger matrin-type protein 5 [Salmo salar]_x0001_gb|ACN12508.1| Zinc finger matrin-type protein 5 [Salmo salar]
BX882033.p.om.7	7	0.32	0.06	0.26	5.33333	gb|AAI33205.1|	XSu(H)1 protein [Xenopus laevis]
CX040898.p.om.7	7	1.6	0.3	1.3	5.33333	gb|ABR68582.1|	NADH dehydrogenase subunit 2 [Telmatochromis temporalis]
CX249279.p.om.7	7	0.48	0.09	0.39	5.33333	ref|NP_001116689.1|	zinc finger protein 217 [Sus scrofa]_x0001_emb|CAN13120.1| zinc finger protein 217 [Sus scrofa]
CB488133.p.om.7	56	4.9	0.92	3.98	5.32609	gb|ACN11475.1|	Transposable element Tcb1 transposase [Salmo salar]
CA374681.p.om.7	14	1.17	0.22	0.95	5.31818	ref|NP_001133429.1|	Carbohydrate sulfotransferase 10 [Salmo salar]_x0001_gb|ACI33217.1| Carbohydrate sulfotransferase 10 [Salmo salar]
BX076943.p.om.7	21	1.01	0.19	0.82	5.31579	ref|NP_001093444.1|	Rho-related BTB domain containing 2a [Danio rerio]_x0001_emb|CAM16078.1| Rho-related BTB domain containing 2a [Danio rerio]
GE822235.p.om.7	14	0.85	0.16	0.69	5.3125	emb|CAJ82132.1|	zinc finger protein 403 [Xenopus tropicalis]
BX867478.p.om.7	14	0.69	0.13	0.56	5.30769	ref|NP_001034905.1|	cytospin-A-A [Danio rerio]_x0001_gb|AAX84193.1| cytospin A [Danio rerio]
CR374430.p.om.7	7	0.53	0.1	0.43	5.3	ref|XM_002663093.1|	PREDICTED: Danio rerio deoxyhypusine hydroxylase/monooxygenase-like (LOC100332103), mRNA
BX309180.p.om.7	21	1.11	0.21	0.91	5.28571	ref|NP_001117016.1|	hyperosmotic glycine rich protein [Salmo salar]_x0001_gb|AAO32675.1| hyperosmotic glycine rich protein [Salmo salar]
BX304752.p.om.7	7	0.37	0.07	0.3	5.28571	ref|NP_001158680.1|	Inorganic pyrophosphatase [Oncorhynchus mykiss]_x0001_gb|ACO08739.1| Inorganic pyrophosphatase [Oncorhynchus mykiss]
BX317969.p.om.7	7	0.37	0.07	0.3	5.28571	ref|NP_001133834.1|	Exosome component 10 [Salmo salar]_x0001_gb|ACI33988.1| Exosome component 10 [Salmo salar]
BX311427.p.om.7	7	0.58	0.11	0.47	5.27273	emb|CAX13555.1|	complement component c3b [Danio rerio]
CA370280.p.om.7	21	1.16	0.22	0.94	5.27273	emb|CAF89611.1|	unnamed protein product [Tetraodon nigroviridis]
CX245960.p.om.7	7	0.58	0.11	0.47	5.27273	ref|NP_001133560.1|	Eukaryotic translation initiation factor 2A [Salmo salar]_x0001_gb|ACI33479.1| Eukaryotic translation initiation factor 2A [Salmo salar]
BX298880.p.om.7	7	0.21	0.04	0.17	5.25	emb|CAD56863.1|	fra2 protein [Takifugu rubripes]
BX870297.p.om.7	7	0.42	0.08	0.34	5.25	gb|ACI68756.1|	NADH dehydrogenase 1 alpha subcomplex subunit 12 [Salmo salar]
BX880721.p.om.7	7	0.42	0.08	0.34	5.25	ref|NP_001134304.1|	Exosome complex exonuclease RRP41 [Salmo salar]_x0001_gb|ACI66983.1| Exosome complex exonuclease RRP41 [Salmo salar]
CX258943.p.om.7	7	0.42	0.08	0.34	5.25	ref|NP_001098252.1|	beta-1,3-galactosyltransferase 6 [Oryzias latipes]_x0001_emb|CAJ84717.1| beta-1,3-galactosyltransferase 6 [Oryzias latipes]
CX716644.p.om.7	7	0.42	0.08	0.34	5.25	gb|ACO07612.1|	Histone H3.3 [Oncorhynchus mykiss]
BX077149.p.om.7	14	0.68	0.13	0.55	5.23077	ref|NP_001082860.1|	sodium/iodide cotransporter [Danio rerio]_x0001_gb|AAI34943.1| Slc5a5 protein [Danio rerio]
CA377411.p.om.7	7	0.47	0.09	0.38	5.22222	emb|CAR66088.1|	GCN2 protein [Danio rerio]
CA349513.p.om.7	7	0.26	0.05	0.21	5.2	ref|NP_001134642.1|	AP-1 complex subunit sigma-3 [Salmo salar]_x0001_gb|ACI68314.1| AP-1 complex subunit sigma-3 [Salmo salar]
BX318394.p.om.7	21	1.09	0.21	0.89	5.19048	tpg|DAA04579.1|	TPA_inf: RTN9-A1 [Oncorhynchus mykiss]
BX865592.p.om.7	48	2.49	0.48	2.01	5.1875	gb|ACH71031.1|	voltage-dependent anion channel 2-3 [Salmo salar]_x0001_gb|ACI69626.1| Voltage-dependent anion-selective channel protein 2 [Salmo salar]
CU066664.p.om.7	14	0.57	0.11	0.47	5.18182	gb|ACO14542.1|	Polycomb group RING finger protein 1 [Esox lucius]
BX889138.p.om.7	27	1.45	0.28	1.17	5.17857	gb|ABM89359.1|	SRF [Pongo pygmaeus]
CA364012.p.om.7	14	0.88	0.17	0.72	5.17647	ref|NP_001135233.1|	Alpha-1,3-mannosyl-glycoprotein 2-beta-N-acetylglucosaminyltransferase [Salmo salar]_x0001_gb|ACI33639.1| Alpha-1,3-mannosyl-glycoprotein 2-beta-N-acetylglucosaminyltransferase [Salmo salar]
BX297547.p.om.7	7	0.31	0.06	0.25	5.16667	dbj|BAG06719.1|	DNAH6 variant protein [Homo sapiens]
CA347372.p.om.7	7	0.31	0.06	0.25	5.16667	ref|NP_956007.1|	calreticulin [Danio rerio]_x0001_gb|AAH57469.1| Calreticulin, like 2 [Danio rerio]_x0001_gb|AAI64724.1| Calrl2 protein [Danio rerio]
CU073255.p.om.7	21	0.62	0.12	0.5	5.16667	gb|AAV38550.1|	protein phosphatase 2 (formerly 2A), regulatory subunit B (PR 52), alpha isoform [synthetic construct]_x0001_gb|AAX42784.1| protein phosphatase 2 regulatory subunit B alpha isoform [synthetic construct]
BX871138.p.om.7	14	0.72	0.14	0.58	5.14286	gb|ACO11751.1|	Ubiquitin-conjugating enzyme E2 C [Caligus rogercresseyi]
BE669061.p.om.7	7	0.82	0.16	0.67	5.125	ref|NP_001027780.1|	coagulation factor VIIb precursor [Takifugu rubripes]_x0001_gb|AAO33369.1|AF465274_1 coagulation factor VIIb precursor [Takifugu rubripes]
CA345196.p.om.7	7	0.41	0.08	0.34	5.125	ref|NP_001135283.1|	Hematopoietic lineage cell-specific protein [Salmo salar]_x0001_gb|ACI34231.1| Hematopoietic lineage cell-specific protein [Salmo salar]
CX038808.p.om.7	27	3.31	0.65	2.66	5.09231	ref|NP_001038117.1|	protein kinase C and casein kinase substrate in neurons 3 [Gallus gallus]_x0001_gb|ABF57669.1| PACSIN 3 [Gallus gallus]
CA369348.p.om.7	40	2.22	0.44	1.78	5.04545	gb|AAX30342.1|	SJCHGC03036 protein [Schistosoma japonicum]
CX032378.p.om.7	40	2.76	0.55	2.21	5.01818	ref|NP_001108595.1|	pericentriolar material 1 [Danio rerio]
BX076141.p.om.7	13	0.4	0.08	0.32	5	ref|NP_001134358.1|	Carboxypeptidase A1 [Salmo salar]_x0001_gb|ACI67200.1| Carboxypeptidase A1 precursor [Salmo salar]
BX302919.p.om.7	20	0.65	0.13	0.52	5	gb|ACH53070.1|	host cell factor 1 (predicted) [Otolemur garnettii]
BX308216.p.om.7	7	0.4	0.08	0.32	5	gb|DAA28388.1|	F-box and leucine-rich repeat protein 5 [Bos taurus]
BX309274.p.om.7	13	0.65	0.13	0.51	5	ref|NP_001013559.1|	DNA repair protein XRCC3 [Danio rerio]_x0001_gb|AAH90820.1| X-ray repair complementing defective repair in Chinese hamster cells 3 [Danio rerio]_x0001_gb|AAI64394.1| Xrcc3 protein [Danio rerio]
BX319406.p.om.7	7	0.2	0.04	0.17	5	ref|NP_001134241.1|	replication factor C subunit 4 [Salmo salar]_x0001_gb|ACI66752.1| Replication factor C subunit 4 [Salmo salar]
BX870956.p.om.7	6	0.15	0.03	0.11	5	gb|AAI24601.1|	Phospholipase C, gamma 2 [Danio rerio]_x0001_gb|AAI64582.1| Plcg2 protein [Danio rerio]
CA344783.p.om.7	6	0.15	0.03	0.12	5	ref|NP_001133212.1|	transmembrane protein 38A-1 [Salmo salar]_x0001_gb|ACH71016.1| transmembrane protein 38A-1 [Salmo salar]
CA375828.p.om.7	13	0.75	0.15	0.59	5	gb|EDL23441.1|	alanyl-tRNA synthetase like [Mus musculus]
CR365805.p.om.7	6	0.15	0.03	0.11	5	ref|NP_001133772.1|	Centaurin-beta-1 [Salmo salar]_x0001_gb|ACI33875.1| Centaurin-beta-1 [Salmo salar]
CU073773.p.om.7	7	0.2	0.04	0.17	5	ref|NP_001170966.1|	UDP glucuronosyltransferase 5 family, polypeptide C1 [Danio rerio]_x0001_gb|ADC91981.1| UDP glucuronosyltransferase 5 family polypeptide c1 [Danio rerio]
CX041120.p.om.7	13	0.75	0.15	0.59	5	ref|NP_001008095.1|	kelch-like 13 [Xenopus (Silurana) tropicalis]_x0001_gb|AAH81294.1| kelch-like 13 [Xenopus (Silurana) tropicalis]
CX150406.p.om.7	20	1.2	0.24	0.96	5	ref|NP_001133521.1|	dyskerin [Salmo salar]_x0001_gb|ACI33401.1| H/ACA ribonucleoprotein complex subunit 4 [Salmo salar]
BX301205.p.om.7	7	0.35	0.07	0.28	5	gb|AAV38885.1|	microtubule-associated protein, RP/EB family, member 2 [synthetic construct]_x0001_gb|AAV38886.1| microtubule-associated protein, RP/EB family, member 2 [synthetic construct]_x0001_gb|AAX42888.1| microtubule-associated protein RP/EB family member 2 [synthetic construct]_x0001_gb|AAX42889.1| microtubule-associated protein RP/EB family member 2 [synthetic construct]
BX317191.p.om.7	7	0.35	0.07	0.29	5	ref|NP_001140125.1|	DNA excision repair protein ERCC-1 [Salmo salar]_x0001_gb|ACM08686.1| DNA excision repair protein ERCC-1 [Salmo salar]
BX319205.p.om.7	13	0.7	0.14	0.56	5	gb|ACQ58563.1|	Mitochondrial intermembrane space import and assembly protein 40 [Anoplopoma fimbria]
BX861696.p.om.7	7	0.35	0.07	0.28	5	gb|AAG60684.1|AF316578_1	gag-protease [Takifugu rubripes]
BX863957.p.om.7	7	0.35	0.07	0.28	5	dbj|AK316299.1|	Homo sapiens cDNA, FLJ79198 complete cds, highly similar to Zinc finger protein 512
BX887732.p.om.7	7	0.35	0.07	0.29	5	ref|NM_032544.3|	Mus musculus GTP binding protein 3 (Gtpbp3), nuclear gene encoding mitochondrial protein, mRNA
CR375953.p.om.7	7	0.35	0.07	0.28	5	gb|ACI66028.1|	Transposable element Tcb1 transposase [Salmo salar]
CX262640.p.om.7	13	0.7	0.14	0.56	5	gb|AAI59234.1|	Si:ch211-142e24.2 protein [Danio rerio]
BX888690.p.om.7	20	1.04	0.21	0.83	4.95238	ref|NP_001134241.1|	replication factor C subunit 4 [Salmo salar]_x0001_gb|ACI66752.1| Replication factor C subunit 4 [Salmo salar]
CA343202.p.om.7	13	1.72	0.35	1.37	4.91429	gb|ACI12871.1|	60S ribosomal protein L24 [Gillichthys mirabilis]
BX888400.p.om.7	13	0.54	0.11	0.43	4.90909	ref|NP_001134355.1|	mediator of RNA polymerase II transcription subunit 20 [Salmo salar]_x0001_gb|ACI67192.1| Mediator of RNA polymerase II transcription subunit 20 [Salmo salar]
BX890052.p.om.7	20	0.93	0.19	0.75	4.89474	gb|AAH30590.1|	RBBP8 protein [Homo sapiens]_x0001_gb|ABM81882.1| retinoblastoma binding protein 8 [synthetic construct]_x0001_gb|ABM85045.1| retinoblastoma binding protein 8 [synthetic construct]
CU073594.p.om.7	13	0.39	0.08	0.31	4.875	dbj|BAG10247.1|	ATP-binding cassette, sub-family A member 3 [synthetic construct]
BX295486.p.om.7	13	0.63	0.13	0.5	4.84615	ref|NP_001165283.1|	glucosylceramidase isoform 3 precursor [Homo sapiens]
AF267126.p.om.7	19	0.29	0.06	0.23	4.83333	gb|AAK58569.1|AF267126_1	cytochrome P450 3A45 [Oncorhynchus mykiss]
CX257831.p.om.7	6	0.29	0.06	0.22	4.83333	ref|NP_001074854.1|	protocadherin 11 X-linked [Mus musculus]
CA380182.p.om.7	19	1.25	0.26	0.98	4.80769	emb|CAG01968.1|	unnamed protein product [Tetraodon nigroviridis]
BX081217.p.om.7	26	1.2	0.25	0.96	4.8	gb|ACZ65015.1|	PspC [Streptococcus pneumoniae]
BX887138.p.om.7	6	0.24	0.05	0.18	4.8	ref|NP_001133860.1|	Toll-like receptor 13 [Salmo salar]_x0001_gb|ACI34036.1| Toll-like receptor 13 precursor [Salmo salar]
CU063498.p.om.7	13	0.96	0.2	0.77	4.8	ref|NP_001082338.1|	tubulin, epsilon 1 [Xenopus laevis]_x0001_gb|AAN77278.1|AF430841_1 epsilon-tubulin [Xenopus laevis]
GE838089.p.om.7	19	1.39	0.29	1.1	4.7931	ref|NP_001117075.1|	main olfactory receptor-like protein [Salmo salar]_x0001_gb|ABD33498.1| main olfactory receptor-like protein [Salmo salar]
BX912348.p.om.7	45	3.21	0.67	2.54	4.79104	gb|ACN10986.1|	Splicing factor, arginine/serine-rich 5 [Salmo salar]
BX884745.p.om.7	51	3.06	0.64	2.42	4.78125	ref|NP_001134617.1|	Epigen [Salmo salar]_x0001_gb|ACI68216.1| Epigen precursor [Salmo salar]
EF063740.p.om.7	6	0.19	0.04	0.15	4.75	emb|CAI21029.1|	novel flavin monooxygenase protein [Danio rerio]
BX860073.p.om.7	19	0.95	0.2	0.75	4.75	gb|ABP65284.1|	ugly duckling [Danio rerio]
BX881732.p.om.7	19	0.95	0.2	0.75	4.75	gb|ACH71267.1|	SET domain bifurcated 1 [Sus scrofa]
BX889679.p.om.7	38	1.42	0.3	1.12	4.73333	gb|AAH72771.1|	Cdt1 protein [Xenopus laevis]
BX313987.p.om.7	13	0.52	0.11	0.42	4.72727	gb|AAP49009.1|	transposase [Rana pipiens]_x0001_tpg|DAA01561.1| TPA_exp: transposase [Rana pipiens]
BX083712.p.om.7	6	0.33	0.07	0.25	4.71429	gb|AAR06589.1|	alpha-2-macroglobulin [Sparus aurata]
BX860560.p.om.7	13	0.66	0.14	0.53	4.71429	ref|NP_001134069.1|	Sodium/potassium-transporting ATPase subunit beta-233 [Salmo salar]_x0001_gb|ACI66117.1| Sodium/potassium-transporting ATPase subunit beta-233 [Salmo salar]
CA347825.p.om.7	12	0.33	0.07	0.26	4.71429	ref|NP_001005722.1|	phosphorylase kinase gamma subunit 1 [Xenopus (Silurana) tropicalis]_x0001_gb|AAH75319.1| phosphorylase kinase, gamma 1 (muscle) [Xenopus (Silurana) tropicalis]
CA364636.p.om.7	6	0.33	0.07	0.26	4.71429	ref|XP_689656.4|	PREDICTED: si:ch211-240l19.1 [Danio rerio]
CX042227.p.om.7	6	0.33	0.07	0.25	4.71429	gb|ACI62770.1|	transcription factor 7-like 1a [Carassius auratus]
CA344955.p.om.7	50	9.02	1.93	7.08	4.67358	ref|NP_001158747.1|	UV excision repair protein RAD23 homolog B [Salmo salar]_x0001_gb|ACN10179.1| UV excision repair protein RAD23 homolog B [Salmo salar]_x0001_gb|ACN12533.1| UV excision repair protein RAD23 homolog B [Salmo salar]
AJ620465.p.om.7	6	0.14	0.03	0.11	4.66667	ref|NP_001117876.1|	complement receptor-like [Oncorhynchus mykiss]_x0001_emb|CAF05664.1| complement receptor-like [Oncorhynchus mykiss]_x0001_emb|CAF05665.1| complement receptor-like protein 1 [Oncorhynchus mykiss]
BX298310.p.om.7	6	0.28	0.06	0.21	4.66667	gb|EAW92077.1|	zinc finger protein 572 [Homo sapiens]
BX299778.p.om.7	6	0.28	0.06	0.22	4.66667	gb|ACI66329.1|	Collagen triple helix repeat-containing protein 1 precursor [Salmo salar]
BX312658.p.om.7	6	0.28	0.06	0.22	4.66667	gb|ACI66462.1|	Gamma-glutamyl hydrolase precursor [Salmo salar]
BX317965.p.om.7	6	0.28	0.06	0.21	4.66667	ref|NP_001093793.1|	kinetochore-associated protein DSN1 homolog [Bos taurus]_x0001_gb|AAI49693.1| DSN1 protein [Bos taurus]_x0001_gb|DAA23188.1| DSN1, MIND kinetochore complex component, homolog [Bos taurus]
BX320104.p.om.7	6	0.28	0.06	0.22	4.66667	ref|NP_001038492.1|	C-C chemokine receptor family-like [Danio rerio]_x0001_emb|CAK03689.1| novel 7 transmembrane receptor (rhodopsin family) protein [Danio rerio]
BX864262.p.om.7	12	0.14	0.03	0.11	4.66667	ref|NP_001118052.1|	OORP [Oncorhynchus mykiss]_x0001_gb|ABG23029.1| OORP [Oncorhynchus mykiss]
CA355192.p.om.7	13	0.42	0.09	0.33	4.66667	dbj|AK307881.1|	Homo sapiens cDNA, FLJ97829
D83256.p.om.7	13	0.14	0.03	0.11	4.66667	ref|NP_001118018.1|	SoxP1 [Oncorhynchus mykiss]_x0001_dbj|BAA11868.1| SoxP1 [Oncorhynchus mykiss]
CA372193.p.om.7	31	1.63	0.35	1.28	4.65714	ref|NP_001133433.1|	Aminoacylase-1 [Salmo salar]_x0001_gb|ACI33224.1| Aminoacylase-1 [Salmo salar]_x0001_gb|ACN11392.1| Aminoacylase-1 [Salmo salar]
GE821460.p.om.7	25	1.21	0.26	0.95	4.65385	gb|ACN60280.1|	NADP transhydrogenase, mitochondrial precursor [Salmo salar]
CA352537.p.om.7	25	1.62	0.35	1.27	4.62857	gb|AAI66406.1|	RGD1563634 protein [Rattus norvegicus]
BX860426.p.om.7	6	0.37	0.08	0.29	4.625	gb|ACN58618.1|	DNA replication licensing factor mcm2 [Salmo salar]
CU074531.p.om.7	12	0.6	0.13	0.46	4.61538	gb|ACN10333.1|	60S ribosomal protein L7a [Salmo salar]_x0001_gb|ACN12693.1| 60S ribosomal protein L7a [Salmo salar]
CA366459.p.om.7	12	0.69	0.15	0.53	4.6	gb|ACN58619.1|	RNA-binding protein 5 [Salmo salar]
CA371139.p.om.7	6	0.46	0.1	0.35	4.6	gb|AAI63538.1|	Slit homolog 1a (Drosophila) [Danio rerio]
CA374513.p.om.7	25	1.38	0.3	1.08	4.6	gb|ACN11475.1|	Transposable element Tcb1 transposase [Salmo salar]
CX032927.p.om.7	87	2.53	0.55	1.98	4.6	ref|NP_001134960.1|	adaptor-related protein complex 3, sigma 1 subunit [Salmo salar]_x0001_gb|ACI69645.1| AP-3 complex subunit sigma-1 [Salmo salar]_x0001_gb|ACO09041.1| AP-3 complex subunit sigma-1 [Osmerus mordax]
CX028823.p.om.7	31	2.02	0.44	1.58	4.59091	gb|ACM08720.1|	Actin-related protein 2/3 complex subunit 5-like protein [Salmo salar]
CA366651.p.om.7	12	0.55	0.12	0.42	4.58333	ref|NP_001134022.1|	G-protein coupled receptor 182 [Salmo salar]_x0001_gb|ACI34328.1| G-protein coupled receptor 182 [Salmo salar]
BX298116.p.om.7	6	0.32	0.07	0.25	4.57143	ref|NP_001167030.1|	ADP-ribosylation factor 1 like [Salmo salar]_x0001_gb|ACH70742.1| ADP-ribosylation factor 1 like [Salmo salar]_x0001_gb|ACI33892.1| ADP-ribosylation factor 1 [Salmo salar]
BX308591.p.om.7	12	0.64	0.14	0.49	4.57143	ref|NP_001018154.1|	component of gems 4 [Danio rerio]_x0001_gb|AAH95194.1| Gem (nuclear organelle) associated protein 4 [Danio rerio]_x0001_gb|AAI65682.1| Gemin4 protein [Danio rerio]
CA347728.p.om.7	13	0.32	0.07	0.25	4.57143	gb|ACN60301.1|	Condensin complex subunit 3 [Salmo salar]
CA359870.p.om.7	6	0.32	0.07	0.25	4.57143	gb|ACN11424.1|	Integrin beta-1 precursor [Salmo salar]
CA372878.p.om.7	12	0.64	0.14	0.49	4.57143	ref|NP_001134266.1|	NFU1 iron-sulfur cluster scaffold homolog [Salmo salar]_x0001_gb|ACI66848.1| NFU1 iron-sulfur cluster scaffold homolog [Salmo salar]
CA348278.p.om.7	37	2.92	0.64	2.28	4.5625	ref|NP_001071035.1|	eukaryotic translation initiation factor 2-alpha kinase 1 [Danio rerio]_x0001_gb|AAI24655.1| Eukaryotic translation initiation factor 2-alpha kinase 1 [Danio rerio]
BX873368.p.om.7	6	0.41	0.09	0.31	4.55556	ref|NP_001100113.1|	probable arginyl-tRNA synthetase, mitochondrial [Rattus norvegicus]_x0001_gb|EDL98596.1| arginyl-tRNA synthetase-like (predicted) [Rattus norvegicus]_x0001_gb|AAI58745.1| Arginyl-tRNA synthetase 2, mitochondrial [Rattus norvegicus]
EF063738.p.om.7	18	0.82	0.18	0.64	4.55556	gb|AAQ94601.1|	flavin containing monooxygenase 1 [Danio rerio]
BX301585.p.om.7	12	0.5	0.11	0.39	4.54545	ref|NP_001167303.1|	lariat debranching enzyme [Salmo salar]_x0001_gb|ACN11322.1| Lariat debranching enzyme [Salmo salar]
BX302331.p.om.7	12	0.5	0.11	0.39	4.54545	ref|NP_001164772.1|	26S proteasome non-ATPase regulatory subunit 4 [Oryctolagus cuniculus]_x0001_gb|ACJ74015.1| proteasome 26S subunit, non-ATPase, 4 (predicted) [Oryctolagus cuniculus]
CA357070.p.om.7	49	1	0.22	0.78	4.54545	dbj|BAC87883.1|	casein kinase I alpha S [Carassius auratus]
CN211122.p.om.7	6	0.5	0.11	0.39	4.54545	ref|NP_001158696.1|	Nucleoside diphosphate kinase B [Oncorhynchus mykiss]_x0001_gb|ACO08811.1| Nucleoside diphosphate kinase B [Oncorhynchus mykiss]
BX878211.p.om.7	6	0.27	0.06	0.21	4.5	ref|NP_001133711.1|	Methionine aminopeptidase 1 [Salmo salar]_x0001_gb|ACI33753.1| Methionine aminopeptidase 1 [Salmo salar]
BX914091.p.om.7	6	0.27	0.06	0.21	4.5	ref|NP_001026742.1|	tyrosine-protein kinase Fes/Fps [Gallus gallus]_x0001_emb|CAA26155.1| c-fps proto oncogene [Gallus gallus]
GE824000.p.om.7	12	0.81	0.18	0.62	4.5	gb|EDM16411.1|	serine/threonine kinase 3 (STE20 homolog, yeast) [Rattus norvegicus]_x0001_gb|AAI61844.1| Serine/threonine kinase 3 (STE20 homolog, yeast) [Rattus norvegicus]
BX316979.p.om.7	12	0.45	0.1	0.35	4.5	gb|ACI69369.1|	Histone RNA hairpin-binding protein [Salmo salar]
CA352444.p.om.7	6	0.45	0.1	0.35	4.5	emb|CAX14734.1|	solute carrier family 8 (sodium-calcium exchanger), member 3 [Danio rerio]_x0001_emb|CAX13700.1| solute carrier family 8 (sodium-calcium exchanger), member 3 [Danio rerio]
CA353651.p.om.7	12	0.72	0.16	0.56	4.5	gb|AAH22709.3|	Acsf3 protein [Mus musculus]
CA379726.p.om.7	6	0.36	0.08	0.28	4.5	gb|ACN58628.1|	Tubulin alpha-1C chain [Salmo salar]
CU073534.p.om.7	6	0.18	0.04	0.14	4.5	ref|NM_144835.4|	Mus musculus HEAT repeat containing 1 (Heatr1), mRNA
CX254065.p.om.7	18	1.12	0.25	0.87	4.48	emb|CAI20756.1|	smoothened homolog (Drosophila) [Danio rerio]
BX881439.p.om.7	18	0.76	0.17	0.59	4.47059	ref|NP_001077020.1|	recombination signal binding protein for immunoglobulin kappa J region b [Danio rerio]_x0001_gb|AAR05134.1| Su(h)B [Danio rerio]_x0001_gb|AAI67436.1| Recombination signal binding protein for immunoglobulin kappa J region b [Danio rerio]_x0001_gb|AAI63294.1| Recombination signal binding protein for immunoglobulin kappa J region b [Danio rerio]_x0001_gb|AAI63296.1| Recombination signal binding prot…
CA363904.p.om.7	12	0.67	0.15	0.52	4.46667	gb|AAH16197.1|	Col4a3bp protein [Mus musculus]
BX308585.p.om.7	24	1.16	0.26	0.9	4.46154	emb|CAX13411.1|	oxoglutarate (alpha-ketoglutarate) dehydrogenase (lipoamide) [Danio rerio]_x0001_emb|CAX12547.1| oxoglutarate (alpha-ketoglutarate) dehydrogenase (lipoamide) [Danio rerio]
CX034648.p.om.7	18	1.16	0.26	0.9	4.46154	ref|NP_001003609.2|	microtubule-associated serine/threonine-protein kinase-like [Danio rerio]
CR363709.p.om.7	6	0.98	0.22	0.76	4.45455	ref|NP_001025137.2|	tRNA selenocysteine 1-associated protein 1-like [Danio rerio]
BX316684.p.om.7	48	2.27	0.51	1.76	4.45098	gb|ACN60318.1|	Eukaryotic translation initiation factor 4B [Salmo salar]
CA345209.p.om.7	12	0.89	0.2	0.69	4.45	dbj|AB463040.1|	Synthetic construct DNA, clone: pF1KA0950, Homo sapiens FAIM2 gene for Fas apoptotic inhibitory molecule 2, without stop codon, in Flexi system
CA381232.p.om.7	72	4.66	1.05	3.61	4.4381	ref|NP_001167405.1|	Heterogeneous nuclear ribonucleoprotein U-like protein 1 [Salmo salar]_x0001_gb|ACN10908.1| Heterogeneous nuclear ribonucleoprotein U-like protein 1 [Salmo salar]
CA347361.p.om.7	30	2.13	0.48	1.65	4.4375	gb|ACN10893.1|	Cleavage and polyadenylation specificity factor subunit 2 [Salmo salar]
CA370340.p.om.7	12	1.02	0.23	0.79	4.43478	ref|NP_001134349.1|	mediator of RNA polymerase II transcription subunit 15 [Salmo salar]_x0001_gb|ACI67173.1| Mediator of RNA polymerase II transcription subunit 15 [Salmo salar]
CA385644.p.om.7	60	4.3	0.97	3.33	4.43299	gb|AAI60909.1|	Snx14 protein [Rattus norvegicus]
BX317978.p.om.7	24	1.64	0.37	1.27	4.43243	ref|NP_001167332.1|	DET1 homolog [Salmo salar]_x0001_gb|ACN11393.1| DET1 homolog [Salmo salar]
AF247729.p.om.7	12	0.62	0.14	0.48	4.42857	gb|AAF75682.2|AF247729_1	glucose transporter 1B [Oncorhynchus mykiss]
BX312537.p.om.7	6	0.31	0.07	0.24	4.42857	gb|EDL36040.1|	homeobox containing 1, isoform CRA_b [Mus musculus]
BX317172.p.om.7	6	0.31	0.07	0.24	4.42857	ref|NP_001077310.1|	pantothenate kinase 1 [Danio rerio]_x0001_gb|AAI33150.1| Pank1b protein [Danio rerio]
BX865711.p.om.7	6	0.31	0.07	0.24	4.42857	gb|ACN09845.1|	Spindle and kinetochore-associated protein 2 [Salmo salar]_x0001_gb|ACN12192.1| Spindle and kinetochore-associated protein 2 [Salmo salar]
BX879348.p.om.7	6	0.31	0.07	0.24	4.42857	ref|NP_956076.1|	nuclear autoantigenic sperm protein [Danio rerio]_x0001_gb|AAH45857.1| Nuclear autoantigenic sperm protein (histone-binding) [Danio rerio]_x0001_gb|AAI65472.1| Nasp protein [Danio rerio]
BX880688.p.om.7	6	0.31	0.07	0.24	4.42857	gb|AAH69731.1|	FOXN2 protein [Homo sapiens]
BX911449.p.om.7	6	0.31	0.07	0.24	4.42857	gb|EDL76539.1|	rCG59247, isoform CRA_c [Rattus norvegicus]
CR374833.p.om.7	6	0.31	0.07	0.24	4.42857	emb|CAX14123.1|	RAB23, member RAS oncogene family [Danio rerio]
CA349245.p.om.7	54	2.73	0.62	2.12	4.40323	gb|AAI59219.1|	C13orf22l protein [Danio rerio]
BX913234.p.om.7	12	0.66	0.15	0.51	4.4	emb|CR354088.1|	Gallus gallus finished cDNA, clone ChEST371o8
CA365724.p.om.7	12	0.66	0.15	0.51	4.4	gb|AAI54767.1|	Ophn1 protein [Danio rerio]
BX909230.p.om.7	6	0.22	0.05	0.17	4.4	gb|ACO14014.1|	Transmembrane emp24 domain-containing protein 2 precursor [Esox lucius]
CU071869.p.om.7	6	0.22	0.05	0.17	4.4	gb|AAI55816.1|	Catenin (cadherin-associated protein), alpha [Danio rerio]
CX028537.p.om.7	18	2.33	0.53	1.8	4.39623	ref|NP_001155103.1|	structural maintenance of chromosomes protein 1A [Danio rerio]
CA380420.p.om.7	24	1.36	0.31	1.05	4.3871	gb|ACN10531.1|	Integrin beta-1 precursor [Salmo salar]
GE835838.p.om.7	18	1.14	0.26	0.88	4.38462	ref|NP_001133228.1|	transposase-like [Salmo salar]_x0001_gb|ACH85309.1| transposase-like [Salmo salar]
CA364782.p.om.7	6	0.92	0.21	0.72	4.38095	gb|GU799144.1|	Epinephelus fuscoguttatus clone 017 microsatellite sequence
CX151980.p.om.7	18	0.92	0.21	0.71	4.38095	gb|ACO09459.1|	CMP-sialic acid transporter [Osmerus mordax]
BX086192.p.om.7	6	0.35	0.08	0.27	4.375	gb|ACN09845.1|	Spindle and kinetochore-associated protein 2 [Salmo salar]_x0001_gb|ACN12192.1| Spindle and kinetochore-associated protein 2 [Salmo salar]
CA344683.p.om.7	6	0.35	0.08	0.27	4.375	gb|EAW63079.1|	mucosa associated lymphoid tissue lymphoma translocation gene 1, isoform CRA_b [Homo sapiens]
CU071816.p.om.7	12	0.35	0.08	0.27	4.375	dbj|BAA83034.2|	KIAA1082 protein [Homo sapiens]
CA343768.p.om.7	6	0.48	0.11	0.37	4.36364	gb|EU446584.1|	Synthetic construct Homo sapiens clone IMAGE:100069999; IMAGE:100011793; FLH257185.01L FLJ25476 protein (FLJ25476) gene, encodes complete protein
BX913947.p.om.7	24	1.09	0.25	0.85	4.36	gb|ABD83935.1|	transposase [Ictalurus punctatus]
CX027836.p.om.7	6	0.74	0.17	0.57	4.35294	gb|ACM08303.1|	Uridine-cytidine kinase 2 [Salmo salar]
BX307682.p.om.7	12	0.65	0.15	0.5	4.33333	gb|ACN60280.1|	NADP transhydrogenase, mitochondrial precursor [Salmo salar]
CA343299.p.om.7	7	0.13	0.03	0.11	4.33333	gb|AAH90682.1|	Dspa protein [Danio rerio]
CA352095.p.om.7	6	0.39	0.09	0.31	4.33333	ref|NP_001117966.1|	prepro-cathepsin C [Oncorhynchus mykiss]_x0001_gb|AAT94060.1| prepro-cathepsin C [Oncorhynchus mykiss]
CA380263.p.om.7	6	0.39	0.09	0.31	4.33333	ref|NP_001133792.1|	Bystin [Salmo salar]_x0001_gb|ACH70823.1| bystin-like [Salmo salar]_x0001_gb|ACI33909.1| Bystin [Salmo salar]
CA347690.p.om.7	35	1.77	0.41	1.36	4.31707	emb|CAN88749.1|	PHD finger protein 10 [Danio rerio]
CX042422.p.om.7	12	0.69	0.16	0.53	4.3125	gb|AAI55816.1|	Catenin (cadherin-associated protein), alpha [Danio rerio]
BX870087.p.om.7	29	1.29	0.3	0.98	4.3	gb|ABF22390.1|	pleckstrin homology domain containing family A member 8 [Takifugu rubripes]
AB023964.p.om.7	6	0.43	0.1	0.33	4.3	gb|EAW96535.1|	inositol 1,4,5-triphosphate receptor, type 2, isoform CRA_b [Homo sapiens]
BX887004.p.om.7	12	0.43	0.1	0.33	4.3	dbj|BAC82611.1|	pol-like protein [Danio rerio]
BX303084.p.om.7	6	0.3	0.07	0.23	4.28571	gb|EAW81086.1|	RNA binding motif protein 25, isoform CRA_a [Homo sapiens]
BX865362.p.om.7	6	0.3	0.07	0.23	4.28571	gb|ACN60301.1|	Condensin complex subunit 3 [Salmo salar]
BX866603.p.om.7	6	0.3	0.07	0.23	4.28571	ref|NP_001133382.1|	U3 small nucleolar RNA-associated protein 18 homolog [Salmo salar]_x0001_gb|ACI33125.1| U3 small nucleolar RNA-associated protein 18 homolog [Salmo salar]
BX875037.p.om.7	6	0.3	0.07	0.24	4.28571	ref|NM_033352.1|	Rattus norvegicus ATP-binding cassette, sub-family D (ALD), member 2 (Abcd2), mRNA_x0001_gb|AF131294.1|AF131294 Rattus norvegicus adrenoleukodystrophy related protein mRNA, complete cds
BX880449.p.om.7	6	0.3	0.07	0.24	4.28571	ref|NP_001167237.1|	Lupus La protein homolog B [Salmo salar]_x0001_gb|ACN11166.1| Lupus La protein homolog B [Salmo salar]
CA385897.p.om.7	6	0.3	0.07	0.23	4.28571	ref|NP_001133713.1|	Insulinoma-associated protein 1 [Salmo salar]_x0001_gb|ACI33756.1| Insulinoma-associated protein 1 [Salmo salar]
CT570743.p.om.7	6	0.3	0.07	0.23	4.28571	dbj|BAA76287.1|	myosin heavy chain [Oncorhynchus keta]
CA349760.p.om.7	58	3.38	0.79	2.59	4.27848	gb|ACN10714.1|	Dolichyl-diphosphooligosaccharide--protein glycosyltransferase subunit STT3A [Salmo salar]
BX909109.p.om.7	29	1.41	0.33	1.08	4.27273	gb|ACI33786.1|	Aspartyl-tRNA synthetase, cytoplasmic [Salmo salar]
BX078276.p.om.7	52	2.99	0.7	2.28	4.27143	ref|NP_001025137.2|	tRNA selenocysteine 1-associated protein 1-like [Danio rerio]
BX298853.p.om.7	35	1.58	0.37	1.21	4.27027	emb|CAM27471.1|	Ras suppressor protein 1 [Mus musculus]_x0001_emb|CAM23726.1| Ras suppressor protein 1 [Mus musculus]_x0001_emb|CAM21360.1| Ras suppressor protein 1 [Mus musculus]_x0001_gb|EDL08048.1| Ras suppressor protein 1, isoform CRA_a [Mus musculus]_x0001_gb|EDL78715.1| rCG55799, isoform CRA_b [Rattus norvegicus]
AB044939.p.om.7	11	0.17	0.04	0.13	4.25	ref|NP_001117673.1|	complement factor B/C2-B [Oncorhynchus mykiss]_x0001_dbj|BAB19788.1| complement factor B/C2-B [Oncorhynchus mykiss]
BX305282.p.om.7	6	0.34	0.08	0.26	4.25	dbj|BAA74928.2|	KIAA0905 protein [Homo sapiens]
CA344730.p.om.7	6	0.17	0.04	0.13	4.25	ref|NM_001044858.1|	Danio rerio si:ch211-51m24.3 (si:ch211-51m24.3), mRNA
CU071397.p.om.7	6	0.17	0.04	0.14	4.25	ref|NP_001108523.1|	si:dkey-5i22.6 [Danio rerio]_x0001_gb|AAI54804.1| Si:dkey-5i22.6 protein [Danio rerio]
CU073593.p.om.7	6	0.17	0.04	0.13	4.25	emb|CAQ14544.1|	ephrin B3 [Danio rerio]
CU074261.p.om.7	6	0.17	0.04	0.13	4.25	gb|AAP37281.1|	MOB protein [Rattus norvegicus]
CX041551.p.om.7	6	0.34	0.08	0.26	4.25	gb|ACM08649.1|	Small ubiquitin-related modifier 3 precursor [Salmo salar]_x0001_gb|ACO07796.1| Small ubiquitin-related modifier 3 precursor [Oncorhynchus mykiss]
BX878202.p.om.7	75	3.35	0.79	2.56	4.24051	gb|EDL16584.1|	nucleoporin 98, isoform CRA_c [Mus musculus]
CA377083.p.om.7	46	2.88	0.68	2.2	4.23529	ref|NP_034564.2|	homeodomain-interacting protein kinase 3 isoform 1 [Mus musculus]_x0001_emb|CAM23687.1| homeodomain interacting protein kinase 3 [Mus musculus]
CA381338.p.om.7	23	4.4	1.04	3.35	4.23077	ref|NP_001167296.1|	Protein-L-isoaspartate O-methyltransferase domain-containing protein 1 [Salmo salar]_x0001_gb|ACN11306.1| Protein-L-isoaspartate O-methyltransferase domain-containing protein 1 [Salmo salar]
BX315876.p.om.7	11	0.38	0.09	0.28	4.22222	gb|ACX71752.1|	nucleotide-binding oligomerization domain-1 [Ctenopharyngodon idella]_x0001_gb|ADB92611.1| nucleotide-binding oligomerization domain-1 [Ctenopharyngodon idella]
CX027745.p.om.7	6	0.38	0.09	0.3	4.22222	gb|EU481821.1|	Salmo salar physical map contig 483, genomic sequence
BX311737.p.om.7	23	0.8	0.19	0.61	4.21053	ref|NP_001135055.1|	Death-associated protein 1 [Salmo salar]_x0001_gb|ACI70034.1| Death-associated protein 1 [Salmo salar]
CA356384.p.om.7	6	0.21	0.05	0.17	4.2	gb|ABF74620.1|	toll-like receptor 20a [Ictalurus punctatus]_x0001_gb|ABF74621.1| toll-like receptor 20a [Ictalurus punctatus]
CA388044.p.om.7	6	0.21	0.05	0.16	4.2	gb|AAI62095.1|	DeltaC [Danio rerio]_x0001_gb|AAI62100.1| DeltaC [Danio rerio]
BX874587.p.om.7	23	1.13	0.27	0.86	4.18519	ref|NP_001133106.1|	cyclin-H [Salmo salar]_x0001_gb|ACH70698.1| cyclin H [Salmo salar]_x0001_gb|ACM09787.1| Cyclin-H [Salmo salar]
CA355108.p.om.7	6	0.25	0.06	0.2	4.16667	ref|NP_001074426.1|	early growth response protein 1 [Taeniopygia guttata]_x0001_gb|ABK54358.1| zinc-finger transcriptional protein [Taeniopygia guttata]
CA370004.p.om.7	6	0.25	0.06	0.2	4.16667	ref|NP_001102123.1|	protein bicaudal D homolog 1 [Rattus norvegicus]_x0001_gb|EDM01363.1| bicaudal D homolog 1 (Drosophila) (predicted) [Rattus norvegicus]
CA375167.p.om.7	6	0.25	0.06	0.19	4.16667	gb|AAI62095.1|	DeltaC [Danio rerio]_x0001_gb|AAI62100.1| DeltaC [Danio rerio]
BX861829.p.om.7	17	0.54	0.13	0.41	4.15385	gb|AAH33302.1|	Nuak2 protein [Mus musculus]
BX298595.p.om.7	6	0.29	0.07	0.23	4.14286	gb|ACQ58466.1|	Prohibitin-2 [Anoplopoma fimbria]
BX313732.p.om.7	6	0.29	0.07	0.23	4.14286	ref|NP_849148.2|	anoctamin-4 [Homo sapiens]_x0001_gb|EAW97647.1| transmembrane protein 16D, isoform CRA_c [Homo sapiens]
CR372500.p.om.7	6	0.29	0.07	0.22	4.14286	gb|ACN10404.1|	Hydroxysteroid dehydrogenase-like protein 2 [Salmo salar]_x0001_gb|ACN12769.1| Hydroxysteroid dehydrogenase-like protein 2 [Salmo salar]
CR373407.p.om.7	6	0.29	0.07	0.23	4.14286	ref|NP_001074881.1|	breakpoint cluster region protein [Mus musculus]
CU068243.p.om.7	6	0.29	0.07	0.23	4.14286	gb|ACM09490.1|	Regulator of G-protein signaling 2 [Salmo salar]
CR943321.p.om.7	232	16.61	4.02	12.59	4.13184	gb|ACI66222.1|	NADH dehydrogenase 1 alpha subcomplex subunit 1 [Salmo salar]_x0001_gb|ACN09884.1| NADH dehydrogenase 1 alpha subcomplex subunit 1 [Salmo salar]_x0001_gb|ACN12231.1| NADH dehydrogenase 1 alpha subcomplex subunit 1 [Salmo salar]
BX077169.p.om.7	23	0.99	0.24	0.76	4.125	ref|NP_001038040.1|	isocitrate dehydrogenase [NAD] subunit beta, mitochondrial [Sus scrofa]_x0001_gb|ABF58004.1| mitochondrial NAD+isocitrate dehydrogenase 3 beta variant 2 [Sus scrofa]_x0001_gb|ABF58005.1| mitochondrial NAD+isocitrate dehydrogenase 3 beta variant 3 [Sus scrofa]
CA377900.p.om.7	11	0.7	0.17	0.52	4.11765	gb|ACI32906.1|	Tubulin alpha chain [Salmo salar]
BX319024.p.om.7	28	1.44	0.35	1.08	4.11429	dbj|BAC82611.1|	pol-like protein [Danio rerio]
CA370265.p.om.7	34	1.27	0.31	0.96	4.09677	ref|NP_942109.2|	zinc fingers and homeoboxes protein 2 [Danio rerio]_x0001_gb|AAI41783.1| Zhx2 protein [Danio rerio]
CA363610.p.om.7	17	1.43	0.35	1.09	4.08571	gb|BC107631.1|	Danio rerio similar to ribosomal L1 domain containing 1, mRNA (cDNA clone IMAGE:7246445), partial cds
BX077101.p.om.7	11	0.49	0.12	0.36	4.08333	gb|ACO07818.1|	Complement component 1 Q subcomponent-binding protein, mitochondrial precursor [Oncorhynchus mykiss]
BX079097.p.om.7	11	0.49	0.12	0.36	4.08333	emb|CAC07955.1|	transcription initiation factor IA protein [Homo sapiens]
BX864552.p.om.7	11	0.49	0.12	0.37	4.08333	gb|AAH64915.1|	INTS8 protein [Homo sapiens]
BX912362.p.om.7	11	0.53	0.13	0.4	4.07692	gb|ACA48503.1|	E1A binding protein p300 [Ctenopharyngodon idella]
CR370325.p.om.7	11	0.53	0.13	0.4	4.07692	ref|NM_001145607.1|	Danio rerio si:dkey-20i10.6 (si:dkey-20i10.6), mRNA
BX868614.p.om.7	11	0.57	0.14	0.43	4.07143	ref|NP_001133129.1|	microtubule-associated protein, RP/EB family, member 1 [Salmo salar]_x0001_gb|ACH70743.1| microtubule-associated protein, RP/EB family member 1 [Salmo salar]
BX872929.p.om.7	11	0.61	0.15	0.45	4.06667	gb|AAB97127.1|	kelch protein; ring canal component involved in cytoplasmic bridges; 77% Similarity to A45773 (PID:g1079096) [Homo sapiens]
CA352441.p.om.7	78	4.39	1.08	3.31	4.06481	ref|NP_001133092.1|	serine/threonine-protein phosphatase PP1-gamma catalytic subunit [Salmo salar]_x0001_gb|ACH70679.1| protein phosphatase 1 catalytic subunit gamma isoform [Salmo salar]
CA359469.p.om.7	17	0.69	0.17	0.52	4.05882	gb|ACO08779.1|	Rho-related GTP-binding protein RhoF [Oncorhynchus mykiss]
BX867558.p.om.7	39	2.31	0.57	1.74	4.05263	ref|XP_002664194.1|	PREDICTED: RAB11 family interacting protein 2-like [Danio rerio]
CA379811.p.om.7	28	1.74	0.43	1.31	4.04651	gb|EAX02165.1|	chromodomain helicase DNA binding protein 2, isoform CRA_d [Homo sapiens]
CA342617.p.om.7	28	0.89	0.22	0.67	4.04545	gb|EU331436.1|	Salvelinus namaycush clone Sna_MSU11 microsatellite sequence
CA373243.p.om.7	22	1.25	0.31	0.94	4.03226	gb|EDL12869.1|	carboxypeptidase D [Mus musculus]
BX087630.p.om.7	55	3.37	0.84	2.52	4.0119	gb|ACM09273.1|	SFRS12IP1 [Salmo salar]
AB007906.p.om.7	13	0.12	0.03	0.1	4	ref|NP_001117653.1|	rtSox23 [Oncorhynchus mykiss]_x0001_dbj|BAA24402.1| rtSox23 [Oncorhynchus mykiss]
AF450282.p.om.7	8	0.04	0.01	0.02	4	ref|NP_001117800.1|	voltage-dependent L-type calcium channel subunit alpha-1D [Oncorhynchus mykiss]_x0001_gb|AAM33831.1|AF450282_1 voltage-gated calcium channel subunit Cav1.3 [Oncorhynchus mykiss]
AJ130843.p.om.7	5	0.16	0.04	0.11	4	gb|ACB45515.1|	sodium/calcium exchanger 1 isoform b [Danio rerio]
BX311300.p.om.7	17	0.6	0.15	0.46	4	gb|AAH47806.1|	Deoxyhypusine synthase [Danio rerio]_x0001_gb|AAI64185.1| Dhps protein [Danio rerio]
BX317321.p.om.7	5	0.12	0.03	0.08	4	ref|NP_001128463.1|	zinc finger and BTB domain containing 12 [Rattus norvegicus]_x0001_gb|AAI69087.1| Ng35 protein [Rattus norvegicus]
BX863661.p.om.7	9	0.04	0.01	0.03	4	ref|NP_001129167.1|	notch 1 [Oncorhynchus mykiss]_x0001_dbj|BAG71913.1| notch1 [Oncorhynchus mykiss]
CA344327.p.om.7	5	0.12	0.03	0.08	4	ref|NP_001158766.1|	AP-1 complex subunit mu-2 [Salmo salar]_x0001_gb|ACN10363.1| AP-1 complex subunit mu-2 [Salmo salar]_x0001_gb|ACN12724.1| AP-1 complex subunit mu-2 [Salmo salar]
CA352502.p.om.7	5	0.12	0.03	0.09	4	ref|NM_204166.1|	Gallus gallus laminin, beta 2 (laminin S) (LAMB2), mRNA_x0001_gb|AF038555.1|AF038555 Gallus gallus laminin beta 2-like chain mRNA, complete cds
CA358625.p.om.7	11	0.68	0.17	0.51	4	gb|AAI46822.1|	NIPBL protein [Homo sapiens]
CA361819.p.om.7	11	0.2	0.05	0.15	4	emb|CAK11295.1|	novel zinc finger domain containing protein [Danio rerio]_x0001_gb|AAI63171.1| Si:dkeyp-113d7.1 [Danio rerio]_x0001_gb|AAI63182.1| Si:dkeyp-113d7.1 [Danio rerio]
CA365894.p.om.7	10	0.12	0.03	0.09	4	ref|NP_001118216.1|	membrane-Toll-like receptor 5 [Oncorhynchus mykiss]_x0001_dbj|BAD38860.1| membrane-Toll-like receptor 5 [Oncorhynchus mykiss]
CB492207.p.om.7	11	0.76	0.19	0.57	4	ref|NP_001133092.1|	serine/threonine-protein phosphatase PP1-gamma catalytic subunit [Salmo salar]_x0001_gb|ACH70679.1| protein phosphatase 1 catalytic subunit gamma isoform [Salmo salar]
CR373705.p.om.7	11	0.52	0.13	0.39	4	gb|EDL97496.1|	renal tumor antigen, isoform CRA_a [Rattus norvegicus]
CU063234.p.om.7	5	0.12	0.03	0.09	4	gb|ABW77497.1|	pyridoxine 5'-phosphate oxidase [Salmo salar]
CU071331.p.om.7	5	0.16	0.04	0.11	4	gb|ACM08395.1|	Oocyte zinc finger protein XlCOF20 [Salmo salar]
CU071676.p.om.7	16	0.44	0.11	0.33	4	gb|ACN58693.1|	Nardilysin precursor [Salmo salar]
CX066770.p.om.7	33	2.76	0.69	2.07	4	gb|ABF21460.1|	cytochrome c oxidase subunit I [Microgadus proximus]
BE669042.p.om.7	22	2.31	0.58	1.73	3.98276	gb|AAH97063.1|	Sec23 homolog A (S. cerevisiae) [Danio rerio]
CU070950.p.om.7	44	2.03	0.51	1.52	3.98039	gb|ACN10495.1|	Transcription cofactor vestigial-like protein 4 [Salmo salar]
BX307470.p.om.7	22	0.95	0.24	0.71	3.95833	ref|NP_001133985.1|	Ribonucleoside-diphosphate reductase large subunit [Salmo salar]_x0001_gb|ACI34262.1| Ribonucleoside-diphosphate reductase large subunit [Salmo salar]_x0001_gb|ACN11136.1| Ribonucleoside-diphosphate reductase large subunit [Salmo salar]
CU071420.p.om.7	27	0.79	0.2	0.59	3.95	gb|AAI59124.1|	dnah1 protein [Xenopus (Silurana) tropicalis]
CX252491.p.om.7	11	0.63	0.16	0.47	3.9375	ref|NP_956688.1|	myotubularin-related protein 8 [Danio rerio]_x0001_gb|AAH53411.1| Myotubularin related protein 8 [Danio rerio]
BX866598.p.om.7	11	0.51	0.13	0.39	3.92308	ref|NP_001134825.1|	Cytosolic sulfotransferase 3 [Salmo salar]_x0001_gb|ACI69056.1| Cytosolic sulfotransferase 3 [Salmo salar]
CA341651.p.om.7	49	2.55	0.65	1.91	3.92308	ref|NP_001133247.1|	cysteine protease ATG4B [Salmo salar]_x0001_gb|ACI32896.1| Cysteine protease ATG4B [Salmo salar]_x0001_gb|ACN10444.1| Cysteine protease ATG4B [Salmo salar]
BX086095.p.om.7	11	0.9	0.23	0.67	3.91304	gb|EAW53931.1|	nudE nuclear distribution gene E homolog 1 (A. nidulans), isoform CRA_a [Homo sapiens]
BX319644.p.om.7	27	0.9	0.23	0.67	3.91304	dbj|BAA25462.1|	KIAA0536 protein [Homo sapiens]
CA362953.p.om.7	16	0.82	0.21	0.61	3.90476	ref|NP_001134019.1|	8-oxoguanine DNA-glycosylase 1 [Salmo salar]_x0001_gb|ACI34323.1| N-glycosylase/DNA lyase [Salmo salar]
CX246574.p.om.7	11	0.74	0.19	0.55	3.89474	gb|AAL91363.1|AF389477_1	SIAH-2 [Rattus norvegicus]
BX300761.p.om.7	11	0.7	0.18	0.53	3.88889	gb|AAI71648.1|	Ighmbp2l protein [Danio rerio]
BX862609.p.om.7	22	0.7	0.18	0.53	3.88889	ref|NP_001082100.1|	p21-activated kinase 5 [Xenopus laevis]_x0001_gb|AAH87332.1| PAK5 protein [Xenopus laevis]
CX042373.p.om.7	11	0.7	0.18	0.53	3.88889	ref|NP_001134008.1|	6-phosphofructo-2-kinase/fructose-2,6-biphosphatase 4 [Salmo salar]_x0001_gb|ACI34300.1| 6-phosphofructo-2-kinase/fructose-2,6-biphosphatase 4 [Salmo salar]
GE821695.p.om.7	32	1.4	0.36	1.03	3.88889	gb|ACI68497.1|	Mitochondrial import receptor subunit TOM34 [Salmo salar]
CA378008.p.om.7	27	1.67	0.43	1.24	3.88372	gb|AAH66556.1|	C20orf14 homolog (H. sapiens) [Danio rerio]
CA352975.p.om.7	11	0.66	0.17	0.5	3.88235	ref|NP_001016846.1|	RING1 and YY1 binding protein [Xenopus (Silurana) tropicalis]
CB485934.p.om.7	16	1.59	0.41	1.18	3.87805	gb|ACI70061.1|	40S ribosomal protein S21 [Salmo salar]_x0001_gb|ACN09940.1| 40S ribosomal protein S21 [Salmo salar]_x0001_gb|ACN12287.1| 40S ribosomal protein S21 [Salmo salar]
CA342798.p.om.7	16	0.81	0.21	0.6	3.85714	gb|ACI33206.1|	Transcription factor MafB [Salmo salar]_x0001_gb|ACN10763.1| Transcription factor MafB [Salmo salar]
BX858829.p.om.7	11	0.54	0.14	0.41	3.85714	ref|NP_001166124.1|	amylo-1, 6-glucosidase, 4-alpha-glucanotransferase [Danio rerio]
DV193928.p.om.7	32	2.58	0.67	1.91	3.85075	gb|ACN10723.1|	Enhancer of polycomb homolog 2 [Salmo salar]
CA353809.p.om.7	16	0.96	0.25	0.71	3.84	gb|ACN60303.1|	Syntaxin-binding protein 2 [Salmo salar]
BX079521.p.om.7	37	1.65	0.43	1.21	3.83721	dbj|BAA82993.2|	KIAA1041 protein [Homo sapiens]
BX297226.p.om.7	5	0.23	0.06	0.16	3.83333	gb|EDL99316.1|	zinc finger protein 451, isoform CRA_b [Rattus norvegicus]
BX297267.p.om.7	5	0.23	0.06	0.16	3.83333	ref|NP_001139486.1|	sal-like protein 1 [Danio rerio]
BX300531.p.om.7	5	0.23	0.06	0.16	3.83333	gb|ABB05054.1|	caspase-1 [Dicentrarchus labrax]_x0001_gb|ABB05055.1| caspase-1 [Dicentrarchus labrax]
BX304979.p.om.7	5	0.23	0.06	0.16	3.83333	gb|ACH85346.1|	WD repeat domain 4-like [Salmo salar]
BX316700.p.om.7	5	0.23	0.06	0.16	3.83333	gb|AAH67694.1|	Topbp1 protein [Danio rerio]
BX319872.p.om.7	5	0.23	0.06	0.16	3.83333	gb|ACI34312.1|	Transcription factor MafB [Salmo salar]
BX880046.p.om.7	5	0.23	0.06	0.16	3.83333	gb|AAF23323.1|AF179302_1	REV1 protein [Mus musculus]
BX909176.p.om.7	5	0.23	0.06	0.16	3.83333	gb|ACN10224.1|	Phenazine biosynthesis-like domain-containing protein 2 [Salmo salar]_x0001_gb|ACN12579.1| Phenazine biosynthesis-like domain-containing protein 2 [Salmo salar]
BX909520.p.om.7	5	0.23	0.06	0.16	3.83333	gb|AAI34976.1|	Si:ch211-203h15.1 protein [Danio rerio]
CU066242.p.om.7	16	0.46	0.12	0.34	3.83333	gb|AAH77318.1|	Fts-prov protein [Xenopus laevis]
CX026853.p.om.7	21	0.88	0.23	0.65	3.82609	ref|XP_319063.4|	AGAP009937-PA [Anopheles gambiae str. PEST]_x0001_gb|EAA14062.4| AGAP009937-PA [Anopheles gambiae str. PEST]
BX305417.p.om.7	32	1.45	0.38	1.08	3.81579	gb|ACI68453.1|	NADH dehydrogenase iron-sulfur protein 8, mitochondrial precursor [Salmo salar]
BX313853.p.om.7	16	0.61	0.16	0.45	3.8125	ref|NP_001020351.1|	six-cysteine containing astacin protease 4 [Danio rerio]_x0001_gb|AAH97232.1| Six-cysteine containing astacin protease 4 [Danio rerio]
CA378121.p.om.7	21	0.61	0.16	0.45	3.8125	ref|NP_001080504.1|	chromodomain helicase DNA binding protein 4 [Xenopus laevis]_x0001_gb|AAH46866.1| B230399n07 protein [Xenopus laevis]
CR366542.p.om.7	360	20.05	5.26	14.79	3.81179	pdb|2C4O|B	Chain B, Crystal Structure Of Human Ubiquitin-Conjugating Enzyme Ubch5b_x0001_pdb|2C4O|C Chain C, Crystal Structure Of Human Ubiquitin-Conjugating Enzyme Ubch5b_x0001_pdb|2C4O|D Chain D, Crystal Structure Of Human Ubiquitin-Conjugating Enzyme Ubch5b_x0001_pdb|2CLW|B Chain B, Crystal Structure Of Human Ubiquitin-Conjugating Enzyme Ubch5b_x0001_pdb|2CLW|C Chain C, Crystal Structure Of Human Ubiquit…
CA362074.p.om.7	16	0.99	0.26	0.73	3.80769	ref|NP_001016863.1|	DCP2 decapping enzyme homolog [Xenopus (Silurana) tropicalis]_x0001_emb|CAJ83772.1| dcp2 decapping enzyme homolog (s. cerevisiae) [Xenopus tropicalis]
DQ400414.p.om.7	90	8.3	2.18	6.12	3.80734	gb|ABD64620.1|	tumor necrosis factor alpha-induced protein 3 [Oncorhynchus mykiss]
CU063096.p.om.7	37	1.18	0.31	0.87	3.80645	gb|AAI54329.1|	Hnrnpl protein [Danio rerio]
BX312519.p.om.7	47	1.52	0.4	1.11	3.8	emb|FM986817.1|	Danio rerio mRNA for UPF1 regulator of nonsense transcripts homolog (yeast) (upf1 gene)
BX880542.p.om.7	5	0.19	0.05	0.14	3.8	gb|EU221179.1|	Salmo salar clone 261P24 interferon-inducible GTPase_b and interferon-inducible GTPase_a genes, complete cds; and TCR-gamma constant region locus
BX886278.p.om.7	5	0.19	0.05	0.13	3.8	ref|NP_001161735.1|	high affinity cAMP-specific 3',5'-cyclic phosphodiesterase 7A [Danio rerio]
CB489691.p.om.7	5	0.19	0.05	0.13	3.8	gb|ACI68024.1|	Histone H3-like centromeric protein A [Salmo salar]_x0001_gb|ACX35612.1| histone H3-like centromeric protein A [Salmo salar]
CX038793.p.om.7	74	4.18	1.1	3.08	3.8	ref|NP_001005395.1|	upstream binding transcription factor, RNA polymerase I [Danio rerio]
CX245829.p.om.7	21	1.1	0.29	0.81	3.7931	gb|ADC91944.1|	UDP glucuronosyltransferase 2 family polypeptide a1 isoform 3 [Danio rerio]
BX079889.p.om.7	100	4.43	1.17	3.26	3.78632	ref|NP_999860.1|	metastasis-associated protein MTA2 [Danio rerio]_x0001_gb|AAH55273.1| Metastasis associated 1 family, member 2 [Danio rerio]
BX298156.p.om.7	58	1.89	0.5	1.39	3.78	ref|NP_775186.1|	nuclear factor of activated T-cells, cytoplasmic 3 isoform 3 [Homo sapiens]_x0001_gb|EAW83213.1| nuclear factor of activated T-cells, cytoplasmic, calcineurin-dependent 3, isoform CRA_c [Homo sapiens]
CR363599.p.om.7	21	1.02	0.27	0.75	3.77778	ref|NP_001161856.1|	transmembrane protein 16E [Gallus gallus]
CA366025.p.om.7	63	3.55	0.94	2.61	3.7766	gb|AAB61638.1|	beta-3A-adaptin subunit of the AP-3 complex [Homo sapiens]_x0001_gb|AAH38444.1| Adaptor-related protein complex 3, beta 1 subunit [Homo sapiens]_x0001_gb|ABM85841.1| adaptor-related protein complex 3, beta 1 subunit [synthetic construct]_x0001_gb|ABW03740.1| adaptor-related protein complex 3, beta 1 subunit [synthetic construct]
BX868845.p.om.7	16	0.83	0.22	0.62	3.77273	gb|ACO07859.1|	Proteasome subunit beta type 4 precursor [Oncorhynchus mykiss]
BX872246.p.om.7	21	0.98	0.26	0.72	3.76923	dbj|BAA86464.1|	KIAA1150 protein [Homo sapiens]
BX888352.p.om.7	21	0.98	0.26	0.72	3.76923	gb|ACO07458.1|	Proteasome subunit beta type 7 precursor [Oncorhynchus mykiss]
CX034263.p.om.7	21	1.13	0.3	0.83	3.76667	ref|NP_001165324.1|	cytokine-inducible SH2-containing protein [Oncorhynchus mykiss]_x0001_emb|CAP17276.1| cytokine-inducible SH2-containing protein [Oncorhynchus mykiss]
BX883551.p.om.7	16	0.79	0.21	0.59	3.7619	gb|AAY51538.1|	IP01468p [Drosophila melanogaster]_x0001_gb|ACL84227.1| CG5245-PA [synthetic construct]
CX258389.p.om.7	16	0.9	0.24	0.67	3.75	ref|NP_001134612.1|	Apolipoprotein A-I [Salmo salar]_x0001_gb|ACI68193.1| Apolipoprotein A-I precursor [Salmo salar]
BX301485.p.om.7	5	0.15	0.04	0.1	3.75	gb|AY707910.1|	Thalassophryne nattereri natterin 3 precursor, mRNA, complete cds
BX858307.p.om.7	5	0.15	0.04	0.1	3.75	gb|AAI70300.1|	Matrix metalloproteinase 21 [Xenopus laevis]_x0001_gb|AAI70298.1| Matrix metalloproteinase 21 [Xenopus laevis]
BX861683.p.om.7	5	0.15	0.04	0.11	3.75	ref|NP_001134306.1|	homeobox protein Dlx4b [Salmo salar]_x0001_gb|ACI66987.1| Homeobox protein Dlx4b [Salmo salar]
BX912242.p.om.7	5	0.15	0.04	0.1	3.75	gb|ACN11262.1|	Inositol-trisphosphate 3-kinase A [Salmo salar]
CA342598.p.om.7	5	0.15	0.04	0.11	3.75	gb|ACI68420.1|	Gamma-glutamyl hydrolase precursor [Salmo salar]
CA352836.p.om.7	10	0.15	0.04	0.11	3.75	dbj|BAB03284.1|	complement C4-1 [Cyprinus carpio]
CA358961.p.om.7	15	0.3	0.08	0.21	3.75	ref|NP_001009884.1|	CAD protein [Danio rerio]_x0001_gb|AAU95538.1| carbamoyl-phosphate synthetase 2, aspartate transcarbamylase, and dihydroorotase [Danio rerio]
BX887359.p.om.7	21	1.12	0.3	0.83	3.73333	gb|ACN60318.1|	Eukaryotic translation initiation factor 4B [Salmo salar]
CA369626.p.om.7	21	1.12	0.3	0.83	3.73333	gb|ACN88688.1|	myeloid/lymphoid or mixed-lineage leukemia [Danio rerio]
CA355923.p.om.7	21	1.23	0.33	0.9	3.72727	ref|NP_001158825.1|	peroxisomal acyl-coenzyme A oxidase 3 [Salmo salar]_x0001_gb|ACN10554.1| Acyl-coenzyme A oxidase 3, peroxisomal [Salmo salar]
CX030938.p.om.7	26	1.49	0.4	1.09	3.725	ref|NP_001101320.1|	RNA-binding protein 28 [Rattus norvegicus]_x0001_gb|EDM15205.1| RNA binding motif protein 28 (predicted), isoform CRA_b [Rattus norvegicus]
BX082147.p.om.7	5	0.26	0.07	0.19	3.71429	ref|NP_958878.1|	inositol hexaphosphate kinase 2 [Danio rerio]_x0001_gb|AAH59642.1| Inositol hexaphosphate kinase 2 [Danio rerio]
BX086199.p.om.7	5	0.26	0.07	0.19	3.71429	ref|NP_001116329.1|	DAB2 interacting protein [Danio rerio]
BX086688.p.om.7	5	0.26	0.07	0.19	3.71429	gb|ACN11497.1|	Splicing factor arginine/serine-rich 11 [Salmo salar]
CA342854.p.om.7	5	0.26	0.07	0.18	3.71429	ref|NP_001133772.1|	Centaurin-beta-1 [Salmo salar]_x0001_gb|ACI33875.1| Centaurin-beta-1 [Salmo salar]
CA350203.p.om.7	5	0.26	0.07	0.19	3.71429	gb|ACN60280.1|	NADP transhydrogenase, mitochondrial precursor [Salmo salar]
CA359929.p.om.7	5	0.26	0.07	0.19	3.71429	emb|CAH03734.1|	protein-O-fucosyltransferase 2 [Takifugu rubripes]
CA366906.p.om.7	5	0.26	0.07	0.18	3.71429	gb|ACO09342.1|	Neurogenic differentiation factor 2 [Osmerus mordax]
CA374792.p.om.7	16	0.26	0.07	0.19	3.71429	ref|NP_001118095.1|	interleukin-21 receptor [Oncorhynchus mykiss]_x0001_emb|CAG25519.1| interleukin-21 receptor [Oncorhynchus mykiss]
CA379026.p.om.7	5	0.26	0.07	0.19	3.71429	gb|AAI72778.1|	FAT tumor suppressor 2 precursor [synthetic construct]
CX260570.p.om.7	5	0.26	0.07	0.19	3.71429	ref|NP_957081.1|	guanine nucleotide-binding protein G(o) subunit alpha [Danio rerio]_x0001_gb|AAH59637.1| Guanine nucleotide binding protein (G protein), alpha activating activity polypeptide O [Danio rerio]
GE821977.p.om.7	5	0.26	0.07	0.19	3.71429	ref|NP_001135121.1|	SUMO-activating enzyme subunit 2 [Salmo salar]_x0001_gb|ACI33764.1| SUMO-activating enzyme subunit 2 [Salmo salar]_x0001_gb|ACI34122.1| SUMO-activating enzyme subunit 2 [Salmo salar]
T23098.p.om.7	10	0.26	0.07	0.19	3.71429	ref|NP_001117104.1|	antithrombin protein [Salmo salar]_x0001_emb|CAB64714.1| antithrombin [Salmo salar]
CA372295.p.om.7	10	0.37	0.1	0.27	3.7	ref|NP_001117966.1|	prepro-cathepsin C [Oncorhynchus mykiss]_x0001_gb|AAT94060.1| prepro-cathepsin C [Oncorhynchus mykiss]
BX300881.p.om.7	26	1.22	0.33	0.89	3.69697	ref|NP_001094618.1|	bcl-2-like protein 12 [Bos taurus]_x0001_gb|AAI49359.1| BCL2L12 protein [Bos taurus]_x0001_gb|DAA19609.1| BCL2-like 12 [Bos taurus]
CR370006.p.om.7	10	0.48	0.13	0.34	3.69231	gb|AY522638.1|	Oreochromis mossambicus ha1009 protein-like mRNA, partial sequence
BX078028.p.om.7	5	0.22	0.06	0.16	3.66667	ref|NP_001117084.1|	scavenger receptor class B type I [Salmo salar]_x0001_gb|ABI93879.1| scavenger receptor class B type I [Salmo salar]
BX078401.p.om.7	5	0.22	0.06	0.16	3.66667	ref|NP_001117976.1|	neutrophil cytosolic factor 2 [Oncorhynchus mykiss]_x0001_gb|AAU04545.1| neutrophil cytosolic factor 2 [Oncorhynchus mykiss]_x0001_dbj|BAD60783.1| NADPH oxidase cytosolic protein p67phox [Oncorhynchus mykiss]
BX299237.p.om.7	5	0.22	0.06	0.16	3.66667	ref|NP_001158681.1|	Tumor suppressor candidate 2 [Oncorhynchus mykiss]_x0001_gb|ACO08740.1| Tumor suppressor candidate 2 [Oncorhynchus mykiss]
BX301543.p.om.7	36	1.54	0.42	1.12	3.66667	ref|NP_001135195.1|	transglutaminase 2 [Salmo salar]_x0001_gb|ACI33140.1| Protein-glutamine gamma-glutamyltransferase 2 [Salmo salar]
BX315127.p.om.7	5	0.22	0.06	0.16	3.66667	ref|NP_080358.3|	dedicator of cytokinesis protein 7 [Mus musculus]
BX864526.p.om.7	5	0.22	0.06	0.16	3.66667	gb|EAW97261.1|	proline/serine-rich coiled-coil 2, isoform CRA_b [Homo sapiens]
BX878060.p.om.7	5	0.22	0.06	0.16	3.66667	ref|NP_001167284.1|	Rab GTPase-binding effector protein 2 [Salmo salar]_x0001_gb|ACN11276.1| Rab GTPase-binding effector protein 2 [Salmo salar]
BX879561.p.om.7	5	0.22	0.06	0.16	3.66667	dbj|BAF31292.1|	DNA polymerase epsilon catalytic subunit [Xenopus laevis]
BX880650.p.om.7	5	0.22	0.06	0.16	3.66667	gb|ABF20550.1|	transposase [Danio rerio]
BX885554.p.om.7	5	0.22	0.06	0.16	3.66667	emb|CAG02459.1|	unnamed protein product [Tetraodon nigroviridis]
BX909725.p.om.7	5	0.22	0.06	0.16	3.66667	gb|AAI71616.1|	Pi4kb protein [Danio rerio]
BX909984.p.om.7	5	0.22	0.06	0.16	3.66667	gb|ACN60351.1|	Negative elongation factor A [Salmo salar]
CA348953.p.om.7	11	0.22	0.06	0.16	3.66667	ref|NP_001096685.1|	collagen alpha-3(VI) chain [Canis lupus familiaris]_x0001_tpe|CAI77244.1| TPA: collagen, type VI, alpha 3 [Canis lupus familiaris]
CA358205.p.om.7	6	0.11	0.03	0.09	3.66667	ref|NP_001134058.1|	Ribonuclease P protein subunit p21 [Salmo salar]_x0001_gb|ACI66079.1| Ribonuclease P protein subunit p21 [Salmo salar]
CA382008.p.om.7	20	0.44	0.12	0.32	3.66667	ref|NP_001004602.1|	bridging integrator 1 [Danio rerio]_x0001_gb|AAH81556.1| Bridging integrator 1 [Danio rerio]
CR376256.p.om.7	5	0.22	0.06	0.16	3.66667	gb|EAW62159.1|	bromodomain containing 8, isoform CRA_a [Homo sapiens]
CX029378.p.om.7	5	0.22	0.06	0.16	3.66667	ref|NP_001167035.1|	E3 ubiquitin-protein ligase Hakai [Salmo salar]_x0001_gb|ACN10453.1| E3 ubiquitin-protein ligase Hakai [Salmo salar]
GE820760.p.om.7	5	0.22	0.06	0.16	3.66667	ref|NP_001027798.1|	SMC3 protein [Takifugu rubripes]_x0001_emb|CAD58849.3| SMC3 protein [Takifugu rubripes]
CA385984.p.om.7	87	4.9	1.34	3.56	3.65672	gb|ACN58648.1|	Syntaxin-binding protein 3 [Salmo salar]
CA381004.p.om.7	92	4.89	1.34	3.55	3.64925	ref|NP_001167160.1|	Long-chain-fatty-acid--CoA ligase 4 [Salmo salar]_x0001_gb|ACN10962.1| Long-chain-fatty-acid--CoA ligase 4 [Salmo salar]
BX087796.p.om.7	10	0.62	0.17	0.44	3.64706	ref|NP_705957.1|	LAG1 homolog, ceramide synthase 2 [Danio rerio]_x0001_gb|AAK83374.1|AF395739_1 Trh3 [Danio rerio]_x0001_gb|AAH45284.1| LAG1 homolog, ceramide synthase 2 (S. cerevisiae) [Danio rerio]_x0001_gb|AAI64702.1| Lass2 protein [Danio rerio]_x0001_emb|CAK04905.2| LAG1 homolog, ceramide synthase 2 (S. cerevisiae) [Danio rerio]
BX313138.p.om.7	15	0.4	0.11	0.29	3.63636	gb|AAI62518.1|	Invs protein [Danio rerio]
CA369612.p.om.7	20	0.4	0.11	0.29	3.63636	dbj|BAD92416.1|	polo-like kinase variant [Homo sapiens]
BX321489.p.om.7	15	0.69	0.19	0.5	3.63158	ref|NP_001140087.1|	DnaJ homolog subfamily C member 17 [Salmo salar]_x0001_gb|ACM09613.1| DnaJ homolog subfamily C member 17 [Salmo salar]
BX911541.p.om.7	10	0.58	0.16	0.42	3.625	gb|AAT68141.1|	splicing factor 3b subunit 1, 155kDa [Danio rerio]
CA361402.p.om.7	5	0.29	0.08	0.21	3.625	gb|AAX46567.1|	chemokine binding protein 2 [Bos taurus]
CA365940.p.om.7	5	0.29	0.08	0.21	3.625	ref|XP_700224.3|	PREDICTED: hypothetical protein [Danio rerio]
CA374029.p.om.7	20	0.29	0.08	0.21	3.625	ref|NP_001133441.1|	N-acetyltransferase ESCO1 [Salmo salar]_x0001_gb|ACI33242.1| N-acetyltransferase ESCO1 [Salmo salar]
CA377710.p.om.7	5	0.29	0.08	0.21	3.625	ref|NP_001167290.1|	HLA-B associated transcript 1 [Salmo salar]_x0001_gb|ACN11292.1| B0,+-type amino acid transporter 1 [Salmo salar]
CX249386.p.om.7	5	0.29	0.08	0.21	3.625	gb|EAW64697.1|	transmembrane protein 16K, isoform CRA_c [Homo sapiens]
CX722187.p.om.7	10	0.58	0.16	0.42	3.625	ref|NP_001032466.1|	cell division cycle protein 16 homolog [Danio rerio]_x0001_gb|AAI08008.1| Cell division cycle 16 homolog (S. cerevisiae) [Danio rerio]
GE826859.p.om.7	51	1.7	0.47	1.23	3.61702	ref|NP_001134842.1|	probable signal peptidase complex subunit 2 [Salmo salar]_x0001_gb|ACI69108.1| Probable signal peptidase complex subunit 2 [Salmo salar]
BX866576.p.om.7	10	0.47	0.13	0.34	3.61538	emb|CAD56863.1|	fra2 protein [Takifugu rubripes]
BX886657.p.om.7	10	0.47	0.13	0.34	3.61538	ref|NP_001166184.1|	Golgin subfamily A member 4 isoform 1 [Homo sapiens]
CX034469.p.om.7	5	0.47	0.13	0.34	3.61538	ref|NP_001133516.1|	26S proteasome non-ATPase regulatory subunit 3 [Salmo salar]_x0001_gb|ACH70973.1| proteasome (prosome, macropain) 26S subunit, non ATPase, 3-1 [Salmo salar]_x0001_gb|ACI33390.1| 26S proteasome non-ATPase regulatory subunit 3 [Salmo salar]
CX153135.p.om.7	5	0.47	0.13	0.34	3.61538	gb|ACH70865.1|	proteasome (prosome, macropain) subunit, beta type 3 [Salmo salar]_x0001_gb|ACI68800.1| Proteasome subunit beta type-3 [Salmo salar]
CX041265.p.om.7	203	11.31	3.13	8.18	3.61342	gb|ABA40770.1|	SJCHGC01393 protein [Schistosoma japonicum]
BX075541.p.om.7	25	1.12	0.31	0.8	3.6129	gb|EAW69173.1|	protein tyrosine phosphatase, receptor type, S, isoform CRA_d [Homo sapiens]
CA352725.p.om.7	10	0.65	0.18	0.46	3.61111	ref|NP_997951.1|	ribosomal protein S6 kinase alpha-1 [Danio rerio]_x0001_gb|AAH45856.1| Ribosomal protein S6 kinase, polypeptide 3 [Danio rerio]_x0001_gb|AAI64040.1| Rps6ka3 protein [Danio rerio]
CA370274.p.om.7	26	0.65	0.18	0.48	3.61111	ref|NP_001135149.1|	AMP deaminase 1 [Salmo salar]_x0001_gb|ACH70621.1| adenosine monophosphate deaminase 1 [Salmo salar]
CX016194.p.om.7	20	1.19	0.33	0.85	3.60606	ref|NG_006885.2|	Mus musculus vomeronasal 2, receptor, pseudogene 19 (Vmn2r-ps19) on chromosome 4
BX883022.p.om.7	15	0.54	0.15	0.39	3.6	ref|NP_001135055.1|	Death-associated protein 1 [Salmo salar]_x0001_gb|ACI70034.1| Death-associated protein 1 [Salmo salar]
BX890313.p.om.7	20	1.08	0.3	0.78	3.6	ref|NP_001134403.1|	Selenoprotein S [Salmo salar]_x0001_gb|ACI67388.1| Selenoprotein S [Salmo salar]
CA379066.p.om.7	10	0.54	0.15	0.39	3.6	gb|ACI29016.1|	semaphorin 4a [Danio rerio]
BX869564.p.om.7	20	0.36	0.1	0.26	3.6	ref|XP_001921422.2|	PREDICTED: KIAA1291 protein-like [Danio rerio]
CA352432.p.om.7	5	0.18	0.05	0.13	3.6	gb|ACO09553.1|	Tripartite motif-containing protein 35 [Osmerus mordax]
CX720060.p.om.7	10	0.36	0.1	0.26	3.6	ref|NP_775382.1|	laminin subunit beta-1 [Danio rerio]_x0001_gb|AAM61767.1|AF468049_1 laminin beta 1 [Danio rerio]
CX028265.p.om.7	41	1.15	0.32	0.84	3.59375	gb|ACO14405.1|	Diablo homolog, mitochondrial precursor [Esox lucius]
CA351098.p.om.7	86	4.42	1.23	3.19	3.5935	ref|NP_001140120.1|	Zinc finger protein 391 [Salmo salar]_x0001_gb|ACM08258.1| Zinc finger protein 391 [Salmo salar]
GE834393.p.om.7	25	0.79	0.22	0.57	3.59091	gb|ACI32959.1|	Agmatinase, mitochondrial precursor [Salmo salar]
CA353885.p.om.7	20	1.4	0.39	1	3.58974	gb|AAI44253.1|	USP37 protein [Homo sapiens]
BX302586.p.om.7	30	1.22	0.34	0.88	3.58824	emb|CAM27283.1|	novel KRAB box and zinc finger, C2H2 type domain containing protein [Mus musculus]
BX084621.p.om.7	10	0.43	0.12	0.31	3.58333	gb|EDM11545.1|	ADP-ribosylation factor guanine nucleotide-exchange factor 1(brefeldin A-inhibited) (predicted), isoform CRA_b [Rattus norvegicus]
BX869839.p.om.7	10	0.43	0.12	0.31	3.58333	gb|ABO13868.1|	ZBTB22 [Salmo salar]
CA388152.p.om.7	15	0.86	0.24	0.61	3.58333	gb|EAW71514.1|	potassium voltage-gated channel, shaker-related subfamily, beta member 2, isoform CRA_c [Homo sapiens]
CX038998.p.om.7	30	1.61	0.45	1.16	3.57778	gb|ABI94728.1|	Smad2 [Ctenopharyngodon idella]
BX297309.p.om.7	5	0.25	0.07	0.18	3.57143	gb|BC071335.1|	Danio rerio replication factor C (activator 1) 3, mRNA (cDNA clone IMAGE:6893548)
BX300004.p.om.7	5	0.25	0.07	0.18	3.57143	gb|AAI62760.1|	Pik3r2 protein [Danio rerio]
BX319099.p.om.7	5	0.25	0.07	0.18	3.57143	ref|NP_956881.2|	guanine monophosphate synthetase [Danio rerio]_x0001_emb|CAX14207.1| guanine monphosphate synthetase [Danio rerio]
BX861128.p.om.7	5	0.25	0.07	0.18	3.57143	gb|AAI39635.1|	Mfge8l protein [Danio rerio]
BX868251.p.om.7	5	0.25	0.07	0.18	3.57143	tpd|FAA00359.1|	TPA: predicted NADPH oxidase organizer 1 [Takifugu rubripes]
BX913475.p.om.7	10	0.5	0.14	0.36	3.57143	gb|ACI34035.1|	Methylcrotonoyl-CoA carboxylase subunit alpha, mitochondrial precursor [Salmo salar]
CA364189.p.om.7	10	1	0.28	0.72	3.57143	emb|CAX15414.1|	apoptotic chromatin condensation inducer 1 [Mus musculus]
CA368690.p.om.7	5	0.25	0.07	0.18	3.57143	ref|NP_001170907.1|	FERM, RhoGEF and pleckstrin domain-containing protein 1 [Taeniopygia guttata]
CR362025.p.om.7	10	0.5	0.14	0.36	3.57143	ref|NP_001016765.1|	mitochondrial ribosomal protein S2 [Xenopus (Silurana) tropicalis]_x0001_emb|CAJ83584.1| mitochondrial ribosomal protein S2 [Xenopus tropicalis]
CR368752.p.om.7	25	0.5	0.14	0.36	3.57143	emb|CAK04045.1|	ubiquitin-like, containing PHD and RING finger domains, 1 [Danio rerio]
CU073635.p.om.7	10	0.25	0.07	0.18	3.57143	gb|AAB88278.1|	achaete-scute homolog 1 [Takifugu rubripes]
CX244830.p.om.7	5	0.25	0.07	0.18	3.57143	gb|AAI55712.1|	fam83h protein [Xenopus (Silurana) tropicalis]
CA351104.p.om.7	20	1.07	0.3	0.77	3.56667	ref|NM_022836.3|	Homo sapiens DNA cross-link repair 1B (PSO2 homolog, S. cerevisiae) (DCLRE1B), mRNA
CA370906.p.om.7	15	0.82	0.23	0.59	3.56522	dbj|BAD96436.1|	RNA binding motif protein 28 variant [Homo sapiens]
CA388277.p.om.7	25	1.64	0.46	1.18	3.56522	ref|NP_001167165.1|	6-phosphofructokinase type C [Salmo salar]_x0001_gb|ACN10969.1| 6-phosphofructokinase type C [Salmo salar]
CX042859.p.om.7	35	1.96	0.55	1.41	3.56364	ref|NP_958905.1|	endophilin-A2 [Danio rerio]_x0001_gb|AAH45942.1| SH3-domain GRB2-like 1b [Danio rerio]_x0001_gb|AAI64167.1| Sh3gl1b protein [Danio rerio]_x0001_emb|CAX14575.1| SH3-domain GRB2-like 1b [Danio rerio]
GE833347.p.om.7	10	0.57	0.16	0.41	3.5625	ref|NP_001112371.1|	teleost multiple tissue opsin [Danio rerio]_x0001_gb|AAI63681.1| Tmtops protein [Danio rerio]
CA381543.p.om.7	50	3.13	0.88	2.25	3.55682	gb|ACN10606.1|	NADP-dependent malic enzyme, mitochondrial precursor [Salmo salar]
CA358734.p.om.7	15	0.64	0.18	0.46	3.55556	gb|ACO09962.1|	Cell division protein kinase 4 [Osmerus mordax]
CA379757.p.om.7	5	0.32	0.09	0.23	3.55556	emb|CAX12085.1|	prenyl (decaprenyl) diphosphate synthase, subunit 2 [Danio rerio]_x0001_emb|CAX12978.1| prenyl (decaprenyl) diphosphate synthase, subunit 2 [Danio rerio]
CT565520.p.om.7	15	0.96	0.27	0.69	3.55556	ref|NP_001134339.1|	ependymin-2 precursor [Salmo salar]_x0001_gb|ACI67122.1| Ependymin-2 precursor [Salmo salar]
CX043086.p.om.7	35	2.31	0.65	1.66	3.55385	ref|NP_955944.1|	serine/arginine-rich protein specific kinase 1 [Danio rerio]_x0001_gb|AAH56825.1| Serine/arginine-rich protein specific kinase 1 [Danio rerio]
BX871160.p.om.7	35	1.74	0.49	1.25	3.55102	ref|NP_998498.1|	SAFB-like transcription modulator [Danio rerio]_x0001_gb|AAH56582.1| SAFB-like, transcription modulator [Danio rerio]
CA355457.p.om.7	30	2.27	0.64	1.63	3.54688	gb|EDL34766.1|	prolyl 4-hydroxylase, beta polypeptide, isoform CRA_b [Mus musculus]
BX312387.p.om.7	10	0.46	0.13	0.33	3.53846	ref|NP_001158681.1|	Tumor suppressor candidate 2 [Oncorhynchus mykiss]_x0001_gb|ACO08740.1| Tumor suppressor candidate 2 [Oncorhynchus mykiss]
CR362215.p.om.7	15	0.46	0.13	0.33	3.53846	gb|AAH98889.1|	Terfa protein [Danio rerio]
BX909186.p.om.7	10	0.53	0.15	0.38	3.53333	gb|ACM09335.1|	Proteasome subunit alpha type-6 [Salmo salar]
CA361822.p.om.7	10	0.53	0.15	0.38	3.53333	ref|NP_001095673.1|	netrin-4 [Bos taurus]_x0001_gb|AAI51287.1| NTN4 protein [Bos taurus]_x0001_gb|DAA29546.1| netrin 4 [Bos taurus]
CA387317.p.om.7	15	1.06	0.3	0.76	3.53333	ref|NP_001171222.1|	TSC22 domain family protein 1 isoform 3 [Mus musculus]
BX878926.p.om.7	10	0.6	0.17	0.43	3.52941	ref|NP_001133751.1|	Thymidine phosphorylase [Salmo salar]_x0001_gb|ACI33838.1| Thymidine phosphorylase precursor [Salmo salar]
BX857795.p.om.7	15	0.74	0.21	0.53	3.52381	dbj|BAA83804.1|	activin B [Anguilla japonica]
CA361503.p.om.7	15	0.81	0.23	0.58	3.52174	gb|AAW31810.1|	Esrom [Danio rerio]
BX865023.p.om.7	70	2.57	0.73	1.85	3.52055	gb|AAI57324.1|	ogfod2 protein [Xenopus (Silurana) tropicalis]
BX308006.p.om.7	20	0.88	0.25	0.63	3.52	gb|EAW98751.1|	patatin-like phospholipase domain containing 4, isoform CRA_a [Homo sapiens]
BX308504.p.om.7	20	0.88	0.25	0.63	3.52	gb|ACN58727.1|	DNA-directed RNA polymerase III subunit RPC2 [Salmo salar]
CX038209.p.om.7	20	1.23	0.35	0.88	3.51429	gb|AAI57533.1|	G protein-coupled receptor kinase interacting ArfGAP 2 [Xenopus (Silurana) tropicalis]
CX034405.p.om.7	20	1.37	0.39	0.99	3.51282	gb|ACQ58901.1|	Thymidine kinase 2, mitochondrial precursor [Anoplopoma fimbria]
CA351776.p.om.7	84	4.49	1.28	3.21	3.50781	emb|CAQ15734.1|	solute carrier family 40 (iron-regulated transporter), member 1 [Danio rerio]_x0001_gb|AAI63874.1| Solute carrier family 40 (iron-regulated transporter), member 1 [Danio rerio]_x0001_gb|ADH03019.1| ferroportin 1 [Danio rerio]
BX311732.p.om.7	5	0.28	0.08	0.2	3.5	ref|NP_001133770.1|	Probable phosphatase phospho1 [Salmo salar]_x0001_gb|ACI33872.1| Probable phosphatase phospho1 [Salmo salar]
BX865032.p.om.7	10	0.56	0.16	0.4	3.5	ref|NP_001158808.1|	E3 ubiquitin-protein ligase RNF34 [Salmo salar]_x0001_gb|ACN10514.1| E3 ubiquitin-protein ligase RNF34 [Salmo salar]
CA347760.p.om.7	5	0.28	0.08	0.2	3.5	ref|NP_001164637.1|	calmodulin-binding transcription activator 2 isoform 2 [Homo sapiens]
CA348131.p.om.7	5	0.14	0.04	0.1	3.5	emb|CAH72927.1|	GTPase activating Rap/RanGAP domain-like 3 [Homo sapiens]_x0001_emb|CAI41459.1| GTPase activating Rap/RanGAP domain-like 3 [Homo sapiens]
CA348172.p.om.7	5	0.28	0.08	0.2	3.5	gb|AAK11715.1|	alpha tubulin subunit [Oncorhynchus nerka]
CA374396.p.om.7	5	0.28	0.08	0.2	3.5	gb|ABA42831.1|	thiazide sensitive Na-Cl co-transporter, solute carrier family 12, member 3 [Oncorhynchus mykiss]
CA378535.p.om.7	10	0.56	0.16	0.4	3.5	gb|EDL20179.1|	zinc finger protein 644, isoform CRA_b [Mus musculus]_x0001_gb|EDL20180.1| zinc finger protein 644, isoform CRA_b [Mus musculus]_x0001_gb|EDL20181.1| zinc finger protein 644, isoform CRA_b [Mus musculus]
CA382776.p.om.7	5	0.28	0.08	0.2	3.5	ref|NP_079411.2|	FH1/FH2 domain-containing protein 3 [Homo sapiens]_x0001_gb|AAI57094.1| Formin homology 2 domain containing 3 [synthetic construct]_x0001_gb|AAI56315.1| Formin homology 2 domain containing 3 [synthetic construct]
CU072783.p.om.7	5	0.14	0.04	0.1	3.5	ref|NM_001008879.2|	Rattus norvegicus zinc finger protein 292 (Znf292), mRNA
CU073801.p.om.7	5	0.14	0.04	0.1	3.5	gb|AAI14265.1|	Distal-less homeobox gene 6a [Danio rerio]
CX032616.p.om.7	5	0.28	0.08	0.2	3.5	gb|AAX24812.2|	SJCHGC04011 protein [Schistosoma japonicum]
CX034630.p.om.7	5	0.28	0.08	0.2	3.5	ref|NP_001011378.1|	cell division cycle associated 7 [Xenopus (Silurana) tropicalis]_x0001_gb|AAH88559.1| cell division cycle associated 7 [Xenopus (Silurana) tropicalis]
CX246580.p.om.7	10	0.14	0.04	0.1	3.5	ref|NP_001118124.1|	insulin-like growth factor binding protein 5 [Oncorhynchus mykiss]_x0001_gb|ABA55021.1| insulin-like growth factor binding protein 5 [Oncorhynchus mykiss]
BX086637.p.om.7	5	0.21	0.06	0.15	3.5	ref|NP_001071231.1|	AT-rich interactive domain-containing protein 2 [Danio rerio]_x0001_gb|AAI27386.1| AT rich interactive domain 2 (ARID, RFX-like) [Danio rerio]
BX295284.p.om.7	15	0.63	0.18	0.45	3.5	ref|NP_571148.1|	tyrosine-protein kinase JAK1 [Danio rerio]_x0001_gb|AAH47165.1| Janus kinase 1 [Danio rerio]
BX311882.p.om.7	5	0.21	0.06	0.15	3.5	ref|NP_001133521.1|	dyskerin [Salmo salar]_x0001_gb|ACI33401.1| H/ACA ribonucleoprotein complex subunit 4 [Salmo salar]
BX317429.p.om.7	74	3.01	0.86	2.15	3.5	ref|NP_001135175.1|	pyruvate kinase [Salmo salar]_x0001_gb|ACH70965.1| pyruvate kinase [Salmo salar]_x0001_gb|ACH70966.1| pyruvate kinase [Salmo salar]
BX318878.p.om.7	10	0.42	0.12	0.3	3.5	gb|EAX03526.1|	LSM2 homolog, U6 small nuclear RNA associated (S. cerevisiae), isoform CRA_b [Homo sapiens]
BX878856.p.om.7	5	0.21	0.06	0.15	3.5	ref|NP_001135032.1|	ribonuclease P protein subunit p30 [Salmo salar]_x0001_gb|ACI69952.1| Ribonuclease P protein subunit p30 [Salmo salar]
BX300020.p.om.7	15	0.7	0.2	0.51	3.5	ref|NP_001167124.1|	Vigilin [Salmo salar]_x0001_gb|ACN10888.1| Vigilin [Salmo salar]
BX855815.p.om.7	10	0.49	0.14	0.35	3.5	gb|ABD85522.1|	zinc finger protein 14-like [Ictalurus punctatus]
CA384464.p.om.7	138	6.95	1.99	4.96	3.49246	gb|ACI68002.1|	Cytochrome b-c1 complex subunit Rieske, mitochondrial precursor [Salmo salar]
CA341574.p.om.7	49	1.85	0.53	1.31	3.49057	gb|ACH70859.1|	ribosomal protein L12 [Salmo salar]_x0001_gb|ACI68370.1| 60S ribosomal protein L12 [Salmo salar]
CB493377.p.om.7	138	3.8	1.09	2.71	3.48624	gb|ACI68221.1|	Vacuolar proton pump subunit E 1 [Salmo salar]
U92198.p.om.7	113	1.88	0.54	1.34	3.48148	gb|AAB53432.1|	Ikaros homolog [Oncorhynchus mykiss]
BX882161.p.om.7	54	2.54	0.73	1.81	3.47945	emb|CAQ08740.1|	GTPase activating protein and VPS9 domains 1 [Homo sapiens]
CA369962.p.om.7	15	0.8	0.23	0.58	3.47826	gb|AAI29149.1|	Eif4ba protein [Danio rerio]
GE828184.p.om.7	20	0.8	0.23	0.58	3.47826	ref|NP_001154042.1|	S-methyl-5'-thioadenosine phosphorylase [Oncorhynchus mykiss]_x0001_gb|ACO07637.1| S-methyl-5-thioadenosine phosphorylase [Oncorhynchus mykiss]
BX309017.p.om.7	10	0.73	0.21	0.53	3.47619	gb|EDK98712.1|	zinc and ring finger 2, isoform CRA_b [Mus musculus]
CA360989.p.om.7	10	0.66	0.19	0.48	3.47368	ref|NP_001158846.1|	lysosomal-associated membrane protein 1 [Salmo salar]_x0001_gb|ACN10599.1| Lysosome-associated membrane glycoprotein 1 precursor [Salmo salar]
BX883112.p.om.7	10	0.52	0.15	0.37	3.46667	ref|NP_999895.1|	ankyrin repeat and SOCS box protein 7 [Danio rerio]_x0001_gb|AAH65964.1| Ankyrin repeat and SOCS box-containing 7 [Danio rerio]
BX873599.p.om.7	59	2.84	0.82	2.02	3.46341	gb|ACN11475.1|	Transposable element Tcb1 transposase [Salmo salar]
BX308344.p.om.7	10	0.38	0.11	0.27	3.45455	pdb|2V3D|A	Chain A, Acid-Beta-Glucosidase With N-Butyl-Deoxynojirimycin_x0001_pdb|2V3D|B Chain B, Acid-Beta-Glucosidase With N-Butyl-Deoxynojirimycin_x0001_pdb|2V3E|A Chain A, Acid-Beta-Glucosidase With N-Nonyl-Deoxynojirimycin_x0001_pdb|2V3E|B Chain B, Acid-Beta-Glucosidase With N-Nonyl-Deoxynojirimycin_x0001_pdb|2V3F|A Chain A, Acid-Beta-Glucosidase Produced In Carrot_x0001_pdb|2V3F|B Chain B, Acid-Beta-G…
CA345657.p.om.7	10	0.38	0.11	0.27	3.45455	gb|ACI34284.1|	Sodium- and chloride-dependent GABA transporter 2 [Salmo salar]
CU074185.p.om.7	10	0.38	0.11	0.27	3.45455	gb|BT043939.1|	Salmo salar clone HM4_1821 KRAB box and zinc finger C2H2 type domain containing protein mRNA, partial cds
BX889127.p.om.7	161	8.73	2.53	6.19	3.45059	gb|ACO07571.1|	40S ribosomal protein S27 [Oncorhynchus mykiss]
BX297136.p.om.7	15	0.69	0.2	0.5	3.45	gb|ACN10040.1|	60S ribosomal protein L27a [Salmo salar]_x0001_gb|ACN12387.1| 60S ribosomal protein L27a [Salmo salar]
BX859858.p.om.7	44	3.07	0.89	2.18	3.44944	gb|AAI54227.1|	Slc48a1b protein [Danio rerio]
BX878170.p.om.7	29	1.31	0.38	0.92	3.44737	emb|CAI22668.1|	chromosome 1 open reading frame 83 [Homo sapiens]
CA382081.p.om.7	15	0.62	0.18	0.45	3.44444	gb|AAI39864.1|	Nusap1 protein [Danio rerio]
BX308271.p.om.7	49	2.17	0.63	1.55	3.44444	ref|NP_001134617.1|	Epigen [Salmo salar]_x0001_gb|ACI68216.1| Epigen precursor [Salmo salar]
CA345716.p.om.7	102	3.26	0.95	2.31	3.43158	gb|ACO07735.1|	Probable mitochondrial import receptor subunit TOM7 homolog [Oncorhynchus mykiss]
CA347191.p.om.7	34	1.44	0.42	1.02	3.42857	gb|ACM08861.1|	Dehydrogenase/reductase SDR family member 7B [Salmo salar]
BX079425.p.om.7	5	0.24	0.07	0.17	3.42857	emb|CAQ51655.1|	phosphodiesterase 4D, cAMP specific [Mus musculus]
BX085096.p.om.7	5	0.24	0.07	0.17	3.42857	dbj|AB385029.1|	Synthetic construct DNA, clone: pF1KB5083, Homo sapiens PLK2 gene for serine/threonine-protein kinase PLK2, complete cds, without stop codon, in Flexi system
BX308122.p.om.7	5	0.24	0.07	0.17	3.42857	gb|ACI33454.1|	Histone mRNA 3-exonuclease 1 [Salmo salar]
BX859110.p.om.7	5	0.24	0.07	0.17	3.42857	ref|NP_001071972.1|	zinc finger protein [Ciona intestinalis]_x0001_dbj|BAE06795.1| zinc finger protein [Ciona intestinalis]
BX860851.p.om.7	5	0.24	0.07	0.17	3.42857	gb|ABW77467.1|	homeobox protein HoxB5aa [Salmo salar]
BX864620.p.om.7	5	0.24	0.07	0.17	3.42857	emb|CT827799.7|	Pig DNA sequence from clone CH242-168I16 on chromosome 14, complete sequence
BX871881.p.om.7	5	0.24	0.07	0.17	3.42857	gb|ACD77174.1|	zinc finger protein 800 (predicted) [Sorex araneus]
BX875774.p.om.7	5	0.24	0.07	0.17	3.42857	ref|NP_001133026.1|	homeobox protein HoxD3aa [Salmo salar]_x0001_gb|ABV82027.1| homeobox protein HoxD3aa [Salmo salar]_x0001_gb|ABW77556.1| homeobox protein HoxD3aa [Salmo salar]
BX877697.p.om.7	5	0.24	0.07	0.17	3.42857	ref|XP_001920583.2|	PREDICTED: si:ch73-60e21.1 [Danio rerio]
BX887156.p.om.7	5	0.24	0.07	0.17	3.42857	ref|NP_001167031.1|	calpain small subunit 1 [Salmo salar]_x0001_gb|ACH70869.1| calpain small subunit 1 [Salmo salar]_x0001_gb|ACI68381.1| Calpain small subunit 1 [Salmo salar]
BX887428.p.om.7	5	0.24	0.07	0.17	3.42857	ref|NP_001087929.1|	peroxisomal biogenesis factor 11B [Xenopus laevis]_x0001_gb|AAH78126.1| Pex11b-prov protein [Xenopus laevis]
BX888128.p.om.7	5	0.24	0.07	0.17	3.42857	gb|ACO13635.1|	N-acetyltransferase 5 [Esox lucius]
BX890522.p.om.7	5	0.24	0.07	0.17	3.42857	gb|ACO13371.1|	L-seryl-tRNASec kinase [Esox lucius]
CR376024.p.om.7	5	0.24	0.07	0.17	3.42857	gb|ACM08400.1|	PRA1 family protein 3 [Salmo salar]_x0001_gb|ADD38086.1| PRA1 family protein 3 [Lepeophtheirus salmonis]
CT569966.p.om.7	5	0.24	0.07	0.17	3.42857	dbj|BAC00871.1|	myosin heavy chain [Oncorhynchus keta]
CU067469.p.om.7	5	0.24	0.07	0.17	3.42857	ref|NP_001123796.1|	suppressor of Ty 5 homolog [Xenopus (Silurana) tropicalis]_x0001_gb|AAI67588.1| supt5h protein [Xenopus (Silurana) tropicalis]
CU068286.p.om.7	5	0.24	0.07	0.18	3.42857	ref|XP_001363114.1|	PREDICTED: similar to serine/threonine kinase [Monodelphis domestica]
AJ582754.p.om.7	24	1.13	0.33	0.79	3.42424	ref|NP_001153977.1|	type I interferon 2 [Oncorhynchus mykiss]_x0001_emb|CAE46918.2| type I interferon 2 [Oncorhynchus mykiss]
BX909958.p.om.7	24	1.06	0.31	0.75	3.41935	ref|NP_001158804.1|	serine/threonine-protein kinase VRK3 [Salmo salar]_x0001_gb|ACN10503.1| Serine/threonine-protein kinase VRK3 [Salmo salar]
CU075250.p.om.7	34	1.57	0.46	1.11	3.41304	ref|NP_001154012.1|	Preimplantation protein 3 [Oncorhynchus mykiss]_x0001_gb|ACO07524.1| Preimplantation protein 3 [Oncorhynchus mykiss]
CU073438.p.om.7	73	2.32	0.68	1.65	3.41176	ref|NP_001133106.1|	cyclin-H [Salmo salar]_x0001_gb|ACH70698.1| cyclin H [Salmo salar]_x0001_gb|ACM09787.1| Cyclin-H [Salmo salar]
AY788890.p.om.7	324	16.62	4.88	11.74	3.40574	ref|NP_001118003.1|	type I interferon [Oncorhynchus mykiss]_x0001_gb|AAV39394.1| type I interferon [Oncorhynchus mykiss]
CA367372.p.om.7	53	3.37	0.99	2.38	3.40404	ref|NP_001134753.1|	Vacuolar protein-sorting-associated protein 25 [Salmo salar]_x0001_gb|ACI68719.1| Vacuolar protein-sorting-associated protein 25 [Salmo salar]
BX300425.p.om.7	19	0.51	0.15	0.36	3.4	ref|NM_001133456.1|	Pongo abelii RRN3 RNA polymerase I transcription factor homolog (S. cerevisiae) (RRN3), mRNA_x0001_emb|CR861206.1| Pongo abelii mRNA; cDNA DKFZp459B073 (from clone DKFZp459B073)
BX877517.p.om.7	24	1.19	0.35	0.84	3.4	gb|ACO14115.1|	RNA-binding motif, single-stranded-interacting protein 1 [Esox lucius]
CR375795.p.om.7	29	1.36	0.4	0.96	3.4	gb|AAI70998.1|	ATPase, H+ transporting, lysosomal V0 subunit a2 [Xenopus (Silurana) tropicalis]
BX909922.p.om.7	29	1.29	0.38	0.91	3.39474	gb|EDL30308.1|	serine/threonine kinase 40, isoform CRA_a [Mus musculus]
BX868128.p.om.7	24	1.12	0.33	0.79	3.39394	gb|DAA27491.1|	mesoderm induction early response protein 2 [Bos taurus]
CA353221.p.om.7	24	1.39	0.41	0.98	3.39024	gb|AAB53434.1|	Ikaros homolog [Oncorhynchus mykiss]
BX087560.p.om.7	53	2.1	0.62	1.48	3.3871	ref|NM_029094.3|	Mus musculus phosphatidylinositol 3-kinase, catalytic, beta polypeptide (Pik3cb), mRNA
BX315833.p.om.7	10	0.44	0.13	0.32	3.38462	gb|ACO09357.1|	Inner membrane protein OXA1L, mitochondrial precursor [Osmerus mordax]
CA363172.p.om.7	29	1.32	0.39	0.94	3.38462	gb|ACN58619.1|	RNA-binding protein 5 [Salmo salar]
BX318883.p.om.7	53	2.47	0.73	1.74	3.38356	gb|ACN58618.1|	DNA replication licensing factor mcm2 [Salmo salar]
CA364950.p.om.7	96	5.81	1.72	4.09	3.37791	gb|DAA32405.1|	E3 ubiquitin-protein ligase RNF25 [Bos taurus]
BX073533.p.om.7	5	0.27	0.08	0.2	3.375	gb|AAS89353.1|	perforin [Ctenopharyngodon idella]
CA371189.p.om.7	24	1.35	0.4	0.95	3.375	gb|AAA39936.1|	cAMP-dependent protein kinase catalytic subunit [Mus musculus]
CA378893.p.om.7	5	0.27	0.08	0.19	3.375	gb|EDL94786.1|	thymoma viral proto-oncogene 3 [Rattus norvegicus]
CX032216.p.om.7	5	0.27	0.08	0.19	3.375	gb|EDM08122.1|	zinc finger protein 180, isoform CRA_c [Rattus norvegicus]
CX246542.p.om.7	5	0.27	0.08	0.19	3.375	gb|ABC47309.1|	telomerase reverse transcriptase [Epinephelus coioides]
EF451543.p.om.7	5	0.27	0.08	0.19	3.375	ref|NP_001118143.1|	TNF superfamily member 13 [Oncorhynchus mykiss]_x0001_gb|ABQ03038.1| TNF superfamily member 13 [Oncorhynchus mykiss]
BX883558.p.om.7	77	3.44	1.02	2.43	3.37255	gb|ACI66272.1|	Group XIIA secretory phospholipase A2 precursor [Salmo salar]
CX136825.p.om.7	19	1.11	0.33	0.78	3.36364	pdb|2I13|A	Chain A, Aart, A Six Finger Zinc Finger Designed To Recognize Ann Triplets_x0001_pdb|2I13|B Chain B, Aart, A Six Finger Zinc Finger Designed To Recognize Ann Triplets
BX316980.p.om.7	14	0.57	0.17	0.39	3.35294	gb|ACI69369.1|	Histone RNA hairpin-binding protein [Salmo salar]
CR363186.p.om.7	19	1.14	0.34	0.8	3.35294	gb|AAH62872.1|	Ttc8 protein [Danio rerio]
BX879875.p.om.7	24	1.54	0.46	1.08	3.34783	ref|NP_001122403.1|	H/ACA ribonucleoprotein complex non-core subunit NAF1 isoform b [Homo sapiens]
CA385955.p.om.7	19	0.97	0.29	0.68	3.34483	ref|NM_001161823.1|	Mus musculus lysine (K)-specific demethylase 4A (Kdm4a), transcript variant 1, mRNA
CA379268.p.om.7	43	2.64	0.79	1.85	3.34177	gb|ABF20543.1|	transposase [Aedes aegypti]
BX080844.p.om.7	5	0.1	0.03	0.07	3.33333	ref|NP_571221.2|	cytochrome P450 26A1 [Danio rerio]_x0001_gb|AAH55232.1| Cytochrome P450, subfamily XXVIA, polypeptide 1 [Danio rerio]
BX087922.p.om.7	5	0.3	0.09	0.22	3.33333	emb|CAF93474.1|	unnamed protein product [Tetraodon nigroviridis]
BX309803.p.om.7	5	0.2	0.06	0.14	3.33333	ref|NP_001072438.1|	glucosidase, beta, acid 3 (cytosolic) [Xenopus (Silurana) tropicalis]_x0001_gb|AAI21689.1| beta-glucosidase (3D533) [Xenopus (Silurana) tropicalis]
BX310690.p.om.7	5	0.2	0.06	0.14	3.33333	gb|ACO14440.1|	UXT [Esox lucius]
BX313426.p.om.7	5	0.2	0.06	0.14	3.33333	gb|AC005087.2|AC005087	Homo sapiens BAC clone CTA-306D19 from 1, complete sequence
BX318514.p.om.7	5	0.2	0.06	0.14	3.33333	gb|AAH66556.1|	C20orf14 homolog (H. sapiens) [Danio rerio]
BX874475.p.om.7	24	1	0.3	0.71	3.33333	ref|NP_998241.1|	ribosomal protein S6 kinase beta-1 [Danio rerio]_x0001_gb|AAH46888.1| Ribosomal protein S6 kinase b, polypeptide 1 [Danio rerio]_x0001_gb|AAI65362.1| Rps6kb1 protein [Danio rerio]
BX886238.p.om.7	5	0.2	0.06	0.14	3.33333	ref|NP_001135124.1|	potassium channel tetramerisation domain containing 9 [Salmo salar]_x0001_gb|ACI34358.1| BTB/POZ domain-containing protein KCTD9 [Salmo salar]
CA350899.p.om.7	5	0.3	0.09	0.22	3.33333	dbj|AB018577.1|	Mus musculus muCdc7 mRNA, complete cds, alternative splicing
CA352337.p.om.7	5	0.1	0.03	0.07	3.33333	gb|ACI68598.1|	G2/mitotic-specific cyclin-B1 [Salmo salar]
CA352594.p.om.7	10	0.3	0.09	0.22	3.33333	ref|NP_001133849.1|	AIDB protein [Salmo salar]_x0001_gb|ACI34013.1| aidB [Salmo salar]
CA362398.p.om.7	5	0.1	0.03	0.08	3.33333	gb|ACI33118.1|	Dihydrodipicolinate synthase-like, mitochondrial precursor [Salmo salar]
CA363452.p.om.7	5	0.1	0.03	0.07	3.33333	ref|NM_029423.2|	Mus musculus RAB11 family interacting protein 1 (class I) (Rab11fip1), transcript variant 2, mRNA
CA369754.p.om.7	38	2.6	0.78	1.82	3.33333	gb|AAI72029.1|	Nat12 protein [Mus musculus]
CA371529.p.om.7	5	0.2	0.06	0.15	3.33333	gb|ACM08302.1|	lymphocyte G0/G1 switch protein 2 [Salmo salar]
CA375385.p.om.7	5	0.2	0.06	0.15	3.33333	ref|NP_999983.1|	rho/rac guanine nucleotide exchange factor (GEF) 18 [Danio rerio]_x0001_gb|AAH70002.1| Rho/rac guanine nucleotide exchange factor (GEF) 18 [Danio rerio]
CA380747.p.om.7	5	0.1	0.03	0.07	3.33333	emb|CAQ14531.1|	polo-like kinase 3 (Drosophila) [Danio rerio]
CB494137.p.om.7	43	1.3	0.39	0.91	3.33333	ref|NP_001139833.1|	Ubiquitin-conjugating enzyme E2 B [Salmo salar]_x0001_gb|ACM08246.1| Ubiquitin-conjugating enzyme E2 B [Salmo salar]
CX145484.p.om.7	5	0.3	0.09	0.22	3.33333	gb|AAS66225.1|	LRRG00134 [Rattus norvegicus]
EF474016.p.om.7	5	0.2	0.06	0.14	3.33333	gb|ABO87657.1|	voltage-gated calcium channel gamma-2 subunit [Oncorhynchus mykiss]
CA349411.p.om.7	38	2.26	0.68	1.58	3.32353	ref|NP_058683.2|	ATP-citrate synthase isoform 1 [Rattus norvegicus]_x0001_gb|EDM06042.1| ATP citrate lyase, isoform CRA_a [Rattus norvegicus]
CX042642.p.om.7	33	1.76	0.53	1.23	3.32075	ref|NP_001070854.1|	solute carrier family 27 (fatty acid transporter), member 6 [Danio rerio]_x0001_gb|AAI22421.1| Solute carrier family 27 (fatty acid transporter), member 6 [Danio rerio]
CA386140.p.om.7	19	3.95	1.19	2.76	3.31933	ref|NP_082470.2|	protein furry homolog-like isoform 1 [Mus musculus]_x0001_gb|AAI72707.1| Furry homolog-like (Drosophila) [synthetic construct]_x0001_gb|AAI56500.1| Furry homolog-like (Drosophila) [synthetic construct]
CU070021.p.om.7	52	2.52	0.76	1.76	3.31579	ref|NP_956834.1|	sorting nexin family member 27 [Danio rerio]_x0001_gb|AAH56315.1| Sorting nexin family member 27 [Danio rerio]_x0001_gb|AAH63999.1| Sorting nexin family member 27 [Danio rerio]
AJ251433.p.om.7	14	0.53	0.16	0.37	3.3125	emb|CAB96452.1|	MHC class II alpha chain [Oncorhynchus mykiss]
BX886964.p.om.7	33	1.52	0.46	1.06	3.30435	gb|ACT34186.1|	SLC25A17 [Ovis aries]
GE825620.p.om.7	19	0.99	0.3	0.69	3.3	ref|NM_177658.3|	Mus musculus Ral GTPase activating protein, beta subunit (non-catalytic) (Ralgapb), mRNA
GE824437.p.om.7	19	0.89	0.27	0.62	3.2963	ref|NP_001135154.1|	testis enhanced gene transcript (BAX inhibitor 1) [Salmo salar]_x0001_gb|ACH70693.1| testis enhanced gene transcript (BAX inhibitor 1) [Salmo salar]
CA366769.p.om.7	14	1.12	0.34	0.78	3.29412	ref|NP_001134019.1|	8-oxoguanine DNA-glycosylase 1 [Salmo salar]_x0001_gb|ACI34323.1| N-glycosylase/DNA lyase [Salmo salar]
CA377960.p.om.7	19	1.02	0.31	0.71	3.29032	gb|EAW47839.1|	SNF2 histone linker PHD RING helicase, isoform CRA_d [Homo sapiens]
BX301789.p.om.7	5	0.23	0.07	0.17	3.28571	ref|NP_001134273.1|	Tumor suppressor candidate 2 [Salmo salar]_x0001_gb|ACI66875.1| Tumor suppressor candidate 2 [Salmo salar]
BX303506.p.om.7	5	0.23	0.07	0.17	3.28571	gb|EDL75918.1|	glucan (1,4-alpha-), branching enzyme 1, isoform CRA_a [Rattus norvegicus]
BX305075.p.om.7	5	0.23	0.07	0.17	3.28571	ref|NP_001134221.1|	tRNA pseudouridine synthase A [Salmo salar]_x0001_gb|ACI66667.1| tRNA pseudouridine synthase A [Salmo salar]
BX305364.p.om.7	5	0.23	0.07	0.16	3.28571	gb|ACI66551.1|	Growth arrest and DNA-damage-inducible protein GADD45 alpha [Salmo salar]
BX306294.p.om.7	5	0.23	0.07	0.17	3.28571	gb|ACO09498.1|	Sphingosine 1-phosphate receptor GPR6 [Osmerus mordax]
BX855685.p.om.7	19	0.92	0.28	0.64	3.28571	ref|NP_001133106.1|	cyclin-H [Salmo salar]_x0001_gb|ACH70698.1| cyclin H [Salmo salar]_x0001_gb|ACM09787.1| Cyclin-H [Salmo salar]
BX861557.p.om.7	9	0.23	0.07	0.15	3.28571	dbj|BAF35855.1|	southpaw [Paralichthys olivaceus]
BX875151.p.om.7	5	0.23	0.07	0.17	3.28571	gb|EDL07747.1|	zinc finger protein 672, isoform CRA_a [Mus musculus]_x0001_gb|EDL07748.1| zinc finger protein 672, isoform CRA_a [Mus musculus]
BX881399.p.om.7	14	0.92	0.28	0.63	3.28571	gb|AAG28762.1|AF299060_1	squamous-cell carcinoma T-cell-recognized antigen [Tetraodon nigroviridis]
CA346252.p.om.7	5	0.23	0.07	0.17	3.28571	gb|AAI54318.1|	Carbonic anhydrase VII [Danio rerio]
CA371905.p.om.7	5	0.23	0.07	0.17	3.28571	ref|NP_001167290.1|	HLA-B associated transcript 1 [Salmo salar]_x0001_gb|ACN11292.1| B0,+-type amino acid transporter 1 [Salmo salar]
CR372058.p.om.7	5	0.23	0.07	0.17	3.28571	gb|EU621901.1|	Oncorhynchus tshawytscha clone ChinookGH2 growth hormone 2 gene, complete cds; and skeletal muscle sodium channel alpha subunit-like, myosin alkali light chain-like, and microtubule-associated protein Tau-like genes, complete sequence
CA342720.p.om.7	75	3.12	0.95	2.17	3.28421	gb|ACI66096.1|	Copper transport protein ATOX1 [Salmo salar]_x0001_gb|ACI66656.1| Copper transport protein ATOX1 [Salmo salar]_x0001_gb|ACI66789.1| Copper transport protein ATOX1 [Salmo salar]_x0001_gb|ACI69489.1| Copper transport protein ATOX1 [Salmo salar]_x0001_gb|ACO08426.1| Copper transport protein ATOX1 [Oncorhynchus mykiss]_x0001_gb|ACO13648.1| Copper transport protein ATOX1 [Esox lucius]_x0001_gb|ACO1425…
BX317012.p.om.7	19	0.82	0.25	0.58	3.28	gb|ABQ22528.1|	sorting nexin 14-like protein [Callithrix jacchus]
BX909502.p.om.7	28	1.18	0.36	0.82	3.27778	gb|ACI34062.1|	Ras-related protein Rab-7a [Salmo salar]
CA386725.p.om.7	47	2.49	0.76	1.73	3.27632	dbj|BAD95609.2|	pumilio-1 [Oncorhynchus mykiss]
BX078681.p.om.7	80	3.34	1.02	2.33	3.27451	ref|NP_001133112.1|	solute carrier family 25 member 3 [Salmo salar]_x0001_gb|ACH70709.1| solute carrier family 25 member 3 [Salmo salar]
BX301602.p.om.7	23	0.49	0.15	0.33	3.26667	gb|AAI62993.1|	Snx17 protein [Danio rerio]
CA371501.p.om.7	14	0.49	0.15	0.34	3.26667	ref|NP_001121547.1|	DCC-interacting protein 13-beta [Danio rerio]_x0001_gb|ABW23078.1| Appl2 [Danio rerio]
CA355791.p.om.7	56	2.97	0.91	2.06	3.26374	gb|ACN10957.1|	F-box only protein 9 [Salmo salar]
BX081735.p.om.7	9	0.39	0.12	0.26	3.25	ref|NP_001154073.1|	actin-related protein 2/3 complex subunit 3 [Oncorhynchus mykiss]_x0001_gb|ACM09803.1| Actin-related protein 2/3 complex subunit 3 [Salmo salar]_x0001_gb|ACN10009.1| Actin-related protein 2/3 complex subunit 3 [Salmo salar]_x0001_gb|ACN10389.1| Actin-related protein 2/3 complex subunit 3 [Salmo salar]_x0001_gb|ACN12356.1| Actin-related protein 2/3 complex subunit 3 [Salmo salar]_x0001_gb|ACN12752…
BX882747.p.om.7	14	0.65	0.2	0.45	3.25	dbj|BAG09828.1|	eukaryotic translation initiation factor 5B [synthetic construct]
CA387081.p.om.7	5	0.13	0.04	0.09	3.25	ref|NP_001011378.1|	cell division cycle associated 7 [Xenopus (Silurana) tropicalis]_x0001_gb|AAH88559.1| cell division cycle associated 7 [Xenopus (Silurana) tropicalis]
CU074255.p.om.7	9	0.26	0.08	0.18	3.25	ref|NP_001074043.1|	iduronate 2-sulfatase [Danio rerio]_x0001_gb|ABK59973.1| iduronate 2-sulfatase [Danio rerio]
CX262152.p.om.7	28	1.43	0.44	0.99	3.25	gb|AAW34265.1|	KIAA0650-like protein [Danio rerio]
BX310830.p.om.7	144	6.81	2.1	4.7	3.24286	gb|ACI69787.1|	Succinate dehydrogenase cytochrome b560 subunit, mitochondrial precursor [Salmo salar]
BX871602.p.om.7	14	0.68	0.21	0.47	3.2381	emb|CAX14064.1|	suppressor of var1, 3-like 1 (S. cerevisiae) [Danio rerio]
BX881932.p.om.7	14	0.55	0.17	0.38	3.23529	gb|ABW77497.1|	pyridoxine 5'-phosphate oxidase [Salmo salar]
CX028445.p.om.7	37	1.94	0.6	1.34	3.23333	gb|ACN11475.1|	Transposable element Tcb1 transposase [Salmo salar]
BX082256.p.om.7	23	0.84	0.26	0.58	3.23077	gb|ACN58649.1|	Cell division cycle protein 23 homolog [Salmo salar]
CR372409.p.om.7	9	0.42	0.13	0.28	3.23077	ref|NP_001134768.1|	laminin subunit beta-1 [Salmo salar]_x0001_gb|ACI68801.1| Laminin subunit beta-1 precursor [Salmo salar]
CA353932.p.om.7	28	1.42	0.44	0.99	3.22727	ref|NP_956905.1|	TBC1 domain family member 5 [Danio rerio]_x0001_gb|AAH56792.1| TBC1 domain family, member 5 [Danio rerio]
CA357301.p.om.7	9	0.29	0.09	0.19	3.22222	ref|NP_001100294.2|	proline-serine-threonine phosphatase-interacting protein 1 [Rattus norvegicus]_x0001_gb|AAI58860.1| Pstpip1 protein [Rattus norvegicus]
BX864185.p.om.7	60	2.9	0.9	2	3.22222	ref|NP_956449.1|	general vesicular transport factor p115 [Danio rerio]_x0001_gb|AAH45300.1| USO1 homolog, vesicle docking protein (yeast) [Danio rerio]_x0001_gb|AAI65676.1| Uso1 protein [Danio rerio]
CX036922.p.om.7	28	1.45	0.45	1	3.22222	ref|NP_001134907.1|	Zinc finger protein 572 [Salmo salar]_x0001_gb|ACI69402.1| Zinc finger protein 572 [Salmo salar]
BX306462.p.om.7	9	0.45	0.14	0.3	3.21429	gb|ACN10986.1|	Splicing factor, arginine/serine-rich 5 [Salmo salar]
BX874446.p.om.7	9	0.48	0.15	0.32	3.2	gb|ACO13456.1|	N-acetyltransferase NAT13 [Esox lucius]
CA383125.p.om.7	9	0.48	0.15	0.32	3.2	ref|NP_001107748.1|	nuclear receptor coactivator 3 [Sus scrofa]_x0001_gb|ABY60789.1| steroid receptor coactivator 3 [Sus scrofa]
BX301960.p.om.7	14	0.64	0.2	0.44	3.2	ref|NP_001134907.1|	Zinc finger protein 572 [Salmo salar]_x0001_gb|ACI69402.1| Zinc finger protein 572 [Salmo salar]
BX872676.p.om.7	9	0.32	0.1	0.22	3.2	gb|ABC96904.1|	slow myosin heavy chain 1 [Salmo salar]
CA359042.p.om.7	9	0.16	0.05	0.11	3.2	ref|NP_001098120.1|	Bloom syndrome helicase [Oryzias latipes]_x0001_gb|ABO84823.1| Bloom syndrome helicase [Oryzias latipes]
CA379447.p.om.7	5	0.16	0.05	0.12	3.2	gb|AAR10464.1|	kinesin Kif5c [Coturnix coturnix]
CA363541.p.om.7	32	1.98	0.62	1.35	3.19355	gb|AAI72910.1|	guanine nucleotide exchange factor p532 [synthetic construct]
CA350481.p.om.7	55	3.8	1.19	2.6	3.19328	ref|NP_001013284.1|	striatin, calmodulin binding protein 3 [Danio rerio]_x0001_gb|AAI55854.1| Strn3 protein [Danio rerio]
CU071804.p.om.7	14	0.51	0.16	0.36	3.1875	gb|AAS83204.1|	reverse transcriptase [Fundulus heteroclitus]
BX314850.p.om.7	23	0.86	0.27	0.59	3.18519	ref|NP_956166.1|	oxysterol-binding protein-related protein 2 [Danio rerio]_x0001_gb|AAH45502.1| Oxysterol binding protein-like 2 [Danio rerio]
GE831349.p.om.7	9	0.35	0.11	0.24	3.18182	gb|AAP49009.1|	transposase [Rana pipiens]_x0001_tpg|DAA01561.1| TPA_exp: transposase [Rana pipiens]
BX306647.p.om.7	18	0.73	0.23	0.49	3.17391	gb|EDL25560.1|	ubiquitin specific peptidase 2, isoform CRA_a [Mus musculus]
BX882001.p.om.7	5	0.19	0.06	0.14	3.16667	gb|DAA25073.1|	lysine-specific demethylase NO66 [Bos taurus]
CA354258.p.om.7	23	1.14	0.36	0.78	3.16667	ref|NP_001167361.1|	Uridine 5-monophosphate synthase [Salmo salar]_x0001_gb|ACN11469.1| Uridine 5-monophosphate synthase [Salmo salar]
CA378950.p.om.7	73	3.89	1.23	2.66	3.1626	ref|NP_001158778.1|	Growth factor receptor-bound protein 2 [Salmo salar]_x0001_gb|ACN10435.1| Growth factor receptor-bound protein 2 [Salmo salar]
BX886941.p.om.7	14	0.6	0.19	0.42	3.15789	ref|NP_001167315.1|	myelin expression factor 2 [Salmo salar]_x0001_gb|ACN11343.1| Myelin expression factor 2 [Salmo salar]
BX077092.p.om.7	9	0.41	0.13	0.28	3.15385	gb|ACI68684.1|	Mid1-interacting protein 1 [Salmo salar]
BX084673.p.om.7	9	0.41	0.13	0.28	3.15385	gb|ABB52828.1|	TAP1 [Oncorhynchus mykiss]
BX298604.p.om.7	9	0.41	0.13	0.28	3.15385	gb|ACQ57852.1|	Mediator of RNA polymerase II transcription subunit 8 [Anoplopoma fimbria]
BX308214.p.om.7	9	0.41	0.13	0.28	3.15385	ref|NP_001133868.1|	TRM61 protein [Salmo salar]_x0001_gb|ACI34049.1| tRNA [Salmo salar]
BX863904.p.om.7	9	0.41	0.13	0.28	3.15385	gb|AAI54577.1|	Heterogeneous nuclear ribonucleoprotein H1 [Danio rerio]
BX910877.p.om.7	9	0.41	0.13	0.28	3.15385	gb|AAI71358.1|	L(3)mbt-like 2 (Drosophila) [Danio rerio]
CR371990.p.om.7	9	0.41	0.13	0.28	3.15385	gb|FJ607781.1|	Oncorhynchus mykiss CD86 membrane protein long isoform (CD86) gene, complete cds
CR374923.p.om.7	23	1.23	0.39	0.85	3.15385	gb|EAW57277.1|	zinc finger protein 180 (HHZ168), isoform CRA_d [Homo sapiens]
BX858001.p.om.7	27	1.29	0.41	0.87	3.14634	gb|EAW74345.1|	zinc finger protein-like 1, isoform CRA_b [Homo sapiens]
GE836079.p.om.7	9	0.22	0.07	0.15	3.14286	ref|NP_001135355.1|	transcription initiation factor TFIID subunit 8 [Salmo salar]_x0001_gb|ACI68889.1| Transcription initiation factor TFIID subunit 8 [Salmo salar]
CA353614.p.om.7	18	1.13	0.36	0.77	3.13889	ref|NP_001005936.1|	G-protein signalling modulator 2, like [Danio rerio]_x0001_gb|AAH83520.1| G-protein signalling modulator 2, like [Danio rerio]_x0001_gb|ABB60050.1| Pinsb [Danio rerio]
BX084003.p.om.7	18	0.69	0.22	0.47	3.13636	gb|ACI67065.1|	Cytochrome c oxidase subunit 4 isoform 2, mitochondrial precursor [Salmo salar]_x0001_gb|ACI67790.1| Cytochrome c oxidase subunit 4 isoform 2, mitochondrial precursor [Salmo salar]_x0001_gb|ACN10083.1| Cytochrome c oxidase subunit 4 isoform 2, mitochondrial precursor [Salmo salar]_x0001_gb|ACN12430.1| Cytochrome c oxidase subunit 4 isoform 2, mitochondrial precursor [Salmo salar]
CA362740.p.om.7	18	0.94	0.3	0.64	3.13333	gb|AAI37707.1|	Fkbp15 protein [Mus musculus]
BX300136.p.om.7	27	1.19	0.38	0.81	3.13158	gb|EAW66386.1|	suppressor of Ty 16 homolog (S. cerevisiae), isoform CRA_a [Homo sapiens]
BX304197.p.om.7	27	0.75	0.24	0.51	3.125	ref|NP_612356.1|	zinc finger protein 551 [Homo sapiens]_x0001_gb|AAH05868.1| Zinc finger protein 551 [Homo sapiens]
BX859599.p.om.7	18	0.5	0.16	0.34	3.125	gb|AAA63306.1|	G alpha q subunit [Mus musculus]
BX866487.p.om.7	14	0.5	0.16	0.35	3.125	gb|AAI14580.1|	Hist1h1b protein [Mus musculus]
CA358279.p.om.7	9	0.5	0.16	0.34	3.125	dbj|BAC82624.1|	pol-like protein [Ciona intestinalis]
CA363719.p.om.7	18	0.5	0.16	0.34	3.125	gb|ACN11015.1|	Activin receptor type-1 precursor [Salmo salar]
CR943405.p.om.7	9	0.78	0.25	0.53	3.12	ref|NP_001091542.1|	retinoblastoma-like protein 2 [Bos taurus]_x0001_gb|AAI40609.1| RBL2 protein [Bos taurus]_x0001_gb|DAA20107.1| retinoblastoma-like 2 (p130) [Bos taurus]
CB495896.p.om.7	9	0.53	0.17	0.36	3.11765	gb|EDL13257.1|	dolichyl-di-phosphooligosaccharide-protein glycotransferase, isoform CRA_a [Mus musculus]
CX027462.p.om.7	27	1.37	0.44	0.93	3.11364	ref|NP_001161710.1|	tyrosine-protein kinase ABL2 isoform h [Homo sapiens]_x0001_gb|ACK76604.1| Abl2 isoform 1BSCTS [Homo sapiens]
CX034680.p.om.7	36	1.93	0.62	1.31	3.1129	ref|NP_001157309.1|	ubiquitin carboxyl-terminal hydrolase BAP1 [Danio rerio]
CX245139.p.om.7	9	0.56	0.18	0.38	3.11111	ref|NP_001129150.1|	ankyrin repeat domain-containing protein 27 [Gallus gallus]
CA342759.p.om.7	40	0.84	0.27	0.56	3.11111	gb|ACI33943.1|	Dynactin subunit 2 [Salmo salar]
BX305542.p.om.7	135	6.03	1.94	4.09	3.10825	ref|NP_001165324.1|	cytokine-inducible SH2-containing protein [Oncorhynchus mykiss]_x0001_emb|CAP17276.1| cytokine-inducible SH2-containing protein [Oncorhynchus mykiss]
BX298785.p.om.7	9	0.31	0.1	0.21	3.1	ref|NP_001139851.1|	Thioredoxin domain-containing protein 12 [Salmo salar]_x0001_gb|ACM08336.1| Thioredoxin domain-containing protein 12 precursor [Salmo salar]
BX866966.p.om.7	9	0.31	0.1	0.21	3.1	ref|NP_942049.1|	CKLF-like MARVEL transmembrane domain-containing protein 8 [Rattus norvegicus]_x0001_gb|AAQ10889.1| chemokine-like related protein 8 [Rattus norvegicus]_x0001_gb|AAH88094.1| CKLF-like MARVEL transmembrane domain containing 8 [Rattus norvegicus]_x0001_gb|EDL76978.1| CKLF-like MARVEL transmembrane domain containing 8, isoform CRA_b [Rattus norvegicus]
CA363393.p.om.7	9	1.33	0.43	0.9	3.09302	emb|X51483.1|	Chicken mRNA for chicken nuclear factor I-C2
CX040385.p.om.7	45	2.35	0.76	1.59	3.09211	gb|ACQ58901.1|	Thymidine kinase 2, mitochondrial precursor [Anoplopoma fimbria]
CB497807.p.om.7	9	0.34	0.11	0.23	3.09091	ref|NP_001158825.1|	peroxisomal acyl-coenzyme A oxidase 3 [Salmo salar]_x0001_gb|ACN10554.1| Acyl-coenzyme A oxidase 3, peroxisomal [Salmo salar]
CU064689.p.om.7	9	0.34	0.11	0.23	3.09091	ref|NP_001101728.1|	probable G-protein coupled receptor 101 [Rattus norvegicus]_x0001_gb|EDL86156.1| rCG49923 [Rattus norvegicus]
BX865605.p.om.7	36	1.7	0.55	1.16	3.09091	ref|NP_001167229.1|	Glycerol kinase, testis specific 1 [Salmo salar]_x0001_gb|ACN11143.1| Glycerol kinase, testis specific 1 [Salmo salar]
CA365972.p.om.7	58	2.81	0.91	1.89	3.08791	ref|NP_001133468.1|	Ubiquitin-conjugating enzyme E2 J1 [Salmo salar]_x0001_gb|ACI33295.1| Ubiquitin-conjugating enzyme E2 J1 [Salmo salar]
CX034756.p.om.7	18	1.76	0.57	1.19	3.08772	ref|NP_001133155.1|	protein arginine N-methyltransferase 1 [Salmo salar]_x0001_gb|ACH70817.1| protein arginine methyltransferase 1 [Salmo salar]
BX296916.p.om.7	76	6.6	2.14	4.46	3.08411	gb|EAX07368.1|	serine/threonine kinase 40, isoform CRA_a [Homo sapiens]
CR370776.p.om.7	27	1.11	0.36	0.76	3.08333	gb|ACN11269.1|	Probable ATP-dependent RNA helicase DDX5 [Salmo salar]
BX078866.p.om.7	9	0.37	0.12	0.25	3.08333	gb|ACI66623.1|	28S ribosomal protein S7, mitochondrial precursor [Salmo salar]
CA368364.p.om.7	9	0.37	0.12	0.25	3.08333	ref|NP_001118131.1|	cyclin B2 [Oncorhynchus mykiss]_x0001_gb|ABI54408.1| cyclin B2 [Oncorhynchus mykiss]
BX321336.p.om.7	210	10.38	3.37	7.01	3.08012	gb|ACN58731.1|	Calcium/calmodulin-dependent protein kinase type II delta chain [Salmo salar]
CX258988.p.om.7	9	0.77	0.25	0.53	3.08	ref|NP_001090834.1|	far upstream element (FUSE) binding protein 3 [Xenopus (Silurana) tropicalis]_x0001_gb|AAI35377.1| fubp3 protein [Xenopus (Silurana) tropicalis]
BX078384.p.om.7	9	0.4	0.13	0.27	3.07692	pdb|1A0J|A	Chain A, Crystal Structure Of A Non-Psychrophilic Trypsin From A Cold-Adapted Fish Species._x0001_pdb|1A0J|B Chain B, Crystal Structure Of A Non-Psychrophilic Trypsin From A Cold-Adapted Fish Species._x0001_pdb|1A0J|C Chain C, Crystal Structure Of A Non-Psychrophilic Trypsin From A Cold-Adapted Fish Species._x0001_pdb|1A0J|D Chain D, Crystal Structure Of A Non-Psychrophilic Trypsin From A Cold-Ad…
BX302892.p.om.7	9	0.4	0.13	0.27	3.07692	ref|NP_001025296.1|	calcium/calmodulin-dependent protein kinase (CaM kinase) II gamma 1 [Danio rerio]_x0001_gb|AAH96785.1| Calcium/calmodulin-dependent protein kinase (CaM kinase) II gamma 1 [Danio rerio]
BX316292.p.om.7	9	0.4	0.13	0.27	3.07692	ref|NP_001134605.1|	Aurora kinase A-interacting protein [Salmo salar]_x0001_gb|ACI68176.1| Aurora kinase A-interacting protein [Salmo salar]
BX861643.p.om.7	9	0.4	0.13	0.27	3.07692	ref|NP_001139863.1|	arsenite methyltransferase [Salmo salar]_x0001_gb|ACM08385.1| Arsenite methyltransferase [Salmo salar]
BX882338.p.om.7	9	0.4	0.13	0.27	3.07692	ref|NP_998080.1|	spastin [Danio rerio]_x0001_gb|AAH67715.1| Spastin [Danio rerio]
BX888169.p.om.7	9	0.4	0.13	0.27	3.07692	ref|NP_001134488.1|	Eukaryotic translation elongation factor 1 epsilon-1 [Salmo salar]_x0001_gb|ACI67723.1| Eukaryotic translation elongation factor 1 epsilon-1 [Salmo salar]
BX879850.p.om.7	18	0.83	0.27	0.56	3.07407	ref|XP_682866.4|	PREDICTED: hypothetical protein [Danio rerio]
BX085465.p.om.7	9	0.43	0.14	0.29	3.07143	gb|DAA25877.1|	proteinase-activated receptor 1 precursor [Bos taurus]
BX315453.p.om.7	9	0.43	0.14	0.29	3.07143	gb|EDL78690.1|	rCG64128 [Rattus norvegicus]
BX870017.p.om.7	9	0.43	0.14	0.29	3.07143	gb|ACO08779.1|	Rho-related GTP-binding protein RhoF [Oncorhynchus mykiss]
CA347549.p.om.7	9	0.43	0.14	0.29	3.07143	gb|EAW66821.1|	phosphatidylinositol-specific phospholipase C, X domain containing 1, isoform CRA_a [Homo sapiens]
CA358752.p.om.7	9	0.43	0.14	0.29	3.07143	ref|NP_001133302.1|	Glycogenin-1 [Salmo salar]_x0001_gb|ACI32996.1| Glycogenin-1 [Salmo salar]
BX074614.p.om.7	31	1.32	0.43	0.89	3.06977	gb|ACN10807.1|	ATP-dependent Clp protease ATP-binding subunit clpX-like, mitochondrial precursor [Salmo salar]
CA342531.p.om.7	138	3.19	1.04	2.15	3.06731	ref|NP_058701.2|	fumarate hydratase, mitochondrial precursor [Rattus norvegicus]_x0001_gb|AAH87598.1| Fumarate hydratase 1 [Rattus norvegicus]_x0001_gb|EDL94769.1| fumarate hydratase 1 [Rattus norvegicus]
CA356073.p.om.7	9	0.46	0.15	0.31	3.06667	ref|NP_001166000.1|	glutamate dehydrogenase 1 [Oncorhynchus mykiss]_x0001_gb|AAM73775.1|AF427342_1 glutamate dehydrogenase 1 [Oncorhynchus mykiss]
CA341993.p.om.7	45	1.38	0.45	0.94	3.06667	gb|ACI66343.1|	Cholesterol 25-hydroxylase-like protein A [Salmo salar]
CA352774.p.om.7	31	1.96	0.64	1.32	3.0625	gb|AAC33526.2|	pol polyprotein [Takifugu rubripes]
BX881188.p.om.7	9	0.52	0.17	0.35	3.05882	gb|ACN10224.1|	Phenazine biosynthesis-like domain-containing protein 2 [Salmo salar]_x0001_gb|ACN12579.1| Phenazine biosynthesis-like domain-containing protein 2 [Salmo salar]
CX257903.p.om.7	9	0.52	0.17	0.36	3.05882	ref|NP_115479.3|	lethal(3)malignant brain tumor-like protein isoform II [Homo sapiens]_x0001_gb|EAW75959.1| l(3)mbt-like (Drosophila), isoform CRA_c [Homo sapiens]
CA373350.p.om.7	40	2.11	0.69	1.42	3.05797	ref|NP_001158856.1|	activating signal cointegrator 1 complex subunit 2 [Salmo salar]_x0001_gb|ACN10618.1| Activating signal cointegrator 1 complex subunit 2 [Salmo salar]
CA358182.p.om.7	18	1.07	0.35	0.73	3.05714	ref|NP_001133848.1|	Mediator of RNA polymerase II transcription subunit 16 [Salmo salar]_x0001_gb|ACI34010.1| Mediator of RNA polymerase II transcription subunit 16 [Salmo salar]
CA361745.p.om.7	9	0.55	0.18	0.37	3.05556	gb|ACN10419.1|	Peroxisomal 2,4-dienoyl-CoA reductase [Salmo salar]_x0001_gb|ACN12785.1| Peroxisomal 2,4-dienoyl-CoA reductase [Salmo salar]
GE839020.p.om.7	40	1.65	0.54	1.11	3.05556	emb|CAB51372.1|	transposase [Pleuronectes platessa]
CB497940.p.om.7	22	1.16	0.38	0.77	3.05263	gb|ADC91921.1|	UDP glucuronosyltransferase 1 family polypeptide a3 isoform 1 [Danio rerio]
CU066886.p.om.7	13	0.58	0.19	0.38	3.05263	gb|ACH70831.1|	proteasome (prosome, macropain) 26S subunit, non-ATPase, 6 [Salmo salar]_x0001_gb|ACI69175.1| 26S proteasome non-ATPase regulatory subunit 6 [Salmo salar]
CU072914.p.om.7	40	1.86	0.61	1.25	3.04918	ref|NP_001134332.1|	CCR4-NOT transcription complex, subunit 6 [Salmo salar]_x0001_gb|ACI67088.1| CCR4-NOT transcription complex subunit 6 [Salmo salar]
BX875890.p.om.7	40	1.89	0.62	1.27	3.04839	gb|ACI33129.1|	Epoxide hydrolase 2 [Salmo salar]
DV200988.p.om.7	9	0.67	0.22	0.46	3.04545	emb|CAI16703.1|	protein phosphatase 2, regulatory subunit B, delta isoform [Homo sapiens]
CX027658.p.om.7	22	2.94	0.97	1.96	3.03093	gb|AAI65249.1|	Smc3 protein [Danio rerio]
BX304503.p.om.7	22	1.18	0.39	0.79	3.02564	ref|NP_001017647.1|	probable dolichyl pyrophosphate Glc1Man9GlcNAc2 alpha-1,3-glucosyltransferase [Danio rerio]_x0001_gb|AAH93349.1| Asparagine-linked glycosylation 8 homolog (yeast, alpha-1,3-glucosyltransferase) [Danio rerio]_x0001_gb|AAI64687.1| Alg8 protein [Danio rerio]
CX260155.p.om.7	141	8.38	2.77	5.61	3.02527	ref|NP_957073.2|	oxoglutarate (alpha-ketoglutarate) dehydrogenase (lipoamide) [Danio rerio]
BX306394.p.om.7	22	1.33	0.44	0.89	3.02273	gb|AAK76396.1|	Rev-Erb beta 2 [Danio rerio]
BX876958.p.om.7	31	1.51	0.5	1.02	3.02	ref|NP_001095480.1|	zinc finger protein 674 [Bos taurus]_x0001_gb|AAI49090.1| ZNF674 protein [Bos taurus]_x0001_gb|DAA12755.1| zinc finger family member 674 [Bos taurus]
CA350645.p.om.7	22	1.05	0.35	0.7	3	gb|ACI66638.1|	mRNA turnover protein 4 homolog [Salmo salar]_x0001_gb|ACI67549.1| mRNA turnover protein 4 homolog [Salmo salar]
CA358478.p.om.7	13	0.54	0.18	0.36	3	gb|AAD27738.1|AF132963_1	CGI-29 protein [Homo sapiens]
CX039651.p.om.7	22	1.11	0.37	0.74	3	gb|AAW34265.1|	KIAA0650-like protein [Danio rerio]
AB012096.p.om.7	4	0.06	0.02	0.03	3	ref|NP_001117657.1|	androgen receptor beta [Oncorhynchus mykiss]_x0001_dbj|BAA32785.1| androgen receptor beta [Oncorhynchus mykiss]
AF175313.p.om.7	5	0.06	0.02	0.04	3	ref|NP_001118070.1|	cardiac sodium-calcium exchanger [Oncorhynchus mykiss]_x0001_gb|AAF06363.1|AF175313_1 cardiac sodium-calcium exchanger [Oncorhynchus mykiss]
AF358667.p.om.7	9	0.24	0.08	0.16	3	ref|NP_001117776.1|	procathepsin B [Oncorhynchus mykiss]_x0001_gb|AAK69705.1|AF358667_1 procathepsin B [Oncorhynchus mykiss]
AY512964.p.om.7	5	0.06	0.02	0.04	3	ref|NP_001167113.1|	Sulfate transporter [Salmo salar]_x0001_gb|ACN10859.1| Sulfate transporter [Salmo salar]
BX072688.p.om.7	9	0.24	0.08	0.16	3	ref|NP_001038690.1|	beta-1,3-galactosyltransferase 6 [Danio rerio]_x0001_emb|CAJ84711.1| beta-1,3-galactosyltransferase 6 [Danio rerio]
BX311367.p.om.7	13	0.45	0.15	0.3	3	gb|AAH67600.1|	Prmt6 protein [Danio rerio]
BX317390.p.om.7	13	0.48	0.16	0.31	3	ref|NP_001158683.1|	YGR024C [Oncorhynchus mykiss]_x0001_gb|ACO08749.1| YGR024C [Oncorhynchus mykiss]
BX317795.p.om.7	9	0.39	0.13	0.26	3	emb|CAM26620.1|	novel KRAB box and zinc finger, C2H2 type domain containing protein [Mus musculus]
BX319245.p.om.7	5	0.12	0.04	0.09	3	gb|AAI71534.1|	Si:dkey-103i16.1 protein [Danio rerio]
BX864224.p.om.7	35	1.59	0.53	1.06	3	ref|NP_001038571.1|	furin A [Danio rerio]_x0001_gb|ABF18688.1| furinA preproprotein [Danio rerio]_x0001_gb|AAI39880.1| Furin (paired basic amino acid cleaving enzyme) a [Danio rerio]
BX867281.p.om.7	9	0.48	0.16	0.33	3	ref|NP_990290.1|	myomesin 1, 185kDa [Gallus gallus]_x0001_gb|AAC59939.1| myomesin [Gallus gallus]
BX867500.p.om.7	9	0.36	0.12	0.25	3	gb|ACI67140.1|	Non-structural maintenance of chromosomes element 1 homolog [Salmo salar]
BX881178.p.om.7	9	0.33	0.11	0.22	3	gb|ACO08898.1|	U3 small nucleolar RNA-interacting protein 2 [Osmerus mordax]
CA343001.p.om.7	4	0.09	0.03	0.06	3	ref|NP_001117111.1|	glycerol-3-phosphate dehydrogenase [Salmo salar]_x0001_gb|AAK07737.1| glycerol-3-phosphate dehydrogenase [Salmo salar]_x0001_gb|ACH70721.1| glycerol-3-phosphate dehydrogenase [Salmo salar]
CA345340.p.om.7	22	1.32	0.44	0.88	3	ref|NP_957462.1|	splicing factor, arginine/serine-rich 8 [Danio rerio]_x0001_gb|AAH47839.1| Splicing factor, arginine/serine-rich 8 [Danio rerio]_x0001_gb|AAI64766.1| Sfrs8 protein [Danio rerio]
CA346045.p.om.7	5	0.09	0.03	0.06	3	gb|EDM03884.1|	insulin-like growth factor binding protein, acid labile subunit, isoform CRA_b [Rattus norvegicus]
CA354483.p.om.7	4	0.12	0.04	0.07	3	ref|NP_001133243.1|	Zinc transporter SLC39A7 [Salmo salar]_x0001_gb|ACI32890.1| Zinc transporter SLC39A7 [Salmo salar]
CA356765.p.om.7	5	0.09	0.03	0.07	3	ref|NP_001133927.1|	myelin-associated glycoprotein [Salmo salar]_x0001_gb|ACI34155.1| Myelin-associated glycoprotein precursor [Salmo salar]
CA358065.p.om.7	4	0.06	0.02	0.04	3	ref|NP_001133388.1|	Filamin-binding LIM protein 1 [Salmo salar]_x0001_gb|ACI33139.1| Filamin-binding LIM protein 1 [Salmo salar]
CA361195.p.om.7	13	0.51	0.17	0.34	3	gb|ACN11246.1|	Casein kinase II subunit alpha [Salmo salar]
CA362019.p.om.7	4	0.09	0.03	0.05	3	ref|NP_001133447.1|	aspartyl aminopeptidase [Salmo salar]_x0001_gb|ACI33253.1| Aspartyl aminopeptidase [Salmo salar]
CA372329.p.om.7	9	0.18	0.06	0.12	3	gb|AAA69898.1|	AHNAK [Homo sapiens]
CA380084.p.om.7	22	1.44	0.48	0.96	3	gb|AAH97063.1|	Sec23 homolog A (S. cerevisiae) [Danio rerio]
CA383268.p.om.7	4	0.12	0.04	0.07	3	ref|NM_001123724.1|	Salmo salar FXYD domain containing ion transport regulator 5b (fxyd5b), mRNA_x0001_tpg|BK006254.1| TPA_exp: Salmo salar FXYD5b mRNA, complete cds
CB495183.p.om.7	18	0.33	0.11	0.22	3	gb|ACI33292.1|	Histone H1-beta, late embryonic [Salmo salar]
CU065373.p.om.7	35	0.99	0.33	0.66	3	ref|NP_001167109.1|	NEDD1 protein [Salmo salar]_x0001_gb|ACN10852.1| NEDD1 [Salmo salar]
CU071238.p.om.7	13	0.39	0.13	0.26	3	gb|ACI32421.1|	mitochondrial uncoupling protein 1 [Siniperca chuatsi]
CU074150.p.om.7	4	0.09	0.03	0.06	3	gb|EDL05730.1|	zinc finger protein 53, isoform CRA_a [Mus musculus]
CX247719.p.om.7	13	0.63	0.21	0.42	3	emb|CAP59633.1|	retinol dehydrogenase 13 [Bos taurus]
DQ640498.p.om.7	4	0.06	0.02	0.04	3	gb|ABG24205.1|	neuronal nitric oxide synthase [Oncorhynchus mykiss]
GE835425.p.om.7	4	0.12	0.04	0.07	3	ref|NP_001158678.1|	Chemokine receptor-like 1 [Oncorhynchus mykiss]_x0001_gb|ACO08732.1| Chemokine receptor-like 1 [Oncorhynchus mykiss]
BX880521.p.om.7	13	0.57	0.19	0.37	3	gb|AAH50490.1|	N-ethylmaleimide-sensitive factor [Danio rerio]_x0001_gb|AAI65659.1| Nsf protein [Danio rerio]
CA354887.p.om.7	13	0.69	0.23	0.46	3	gb|AAI00611.1|	gcs1-prov protein [Xenopus (Silurana) tropicalis]
CU070239.p.om.7	13	0.6	0.2	0.4	3	gb|AAH90411.1|	Dopey1 protein [Danio rerio]
BX077737.p.om.7	61	2.57	0.86	1.71	2.98837	ref|NP_001140091.1|	Clathrin light chain B [Salmo salar]_x0001_gb|ACM09625.1| Clathrin light chain B [Salmo salar]
CA341692.p.om.7	26	1.16	0.39	0.77	2.97436	gb|AAH80229.1|	Golgi associated, gamma adaptin ear containing, ARF binding protein 1 [Danio rerio]
CA369866.p.om.7	74	3.71	1.25	2.46	2.968	gb|ACH70650.1|	capping protein (actin filament) muscle Z-line beta [Salmo salar]
BX867499.p.om.7	13	0.8	0.27	0.53	2.96296	gb|ACH70809.1|	actin related protein 2/3 complex subunit 2 [Salmo salar]
CU071918.p.om.7	48	1.42	0.48	0.95	2.95833	gb|EAW54557.1|	MYST histone acetyltransferase (monocytic leukemia) 4, isoform CRA_a [Homo sapiens]
BX321606.p.om.7	17	0.68	0.23	0.44	2.95652	ref|NP_997987.1|	phosphatidylinositol 3-kinase regulatory subunit beta [Danio rerio]_x0001_gb|AAP59552.1| phosphoinositide 3-kinase regulatory beta subunit [Danio rerio]
CX032997.p.om.7	39	1.98	0.67	1.31	2.95522	gb|ACI33758.1|	Clathrin light chain A [Salmo salar]
CR373709.p.om.7	13	0.62	0.21	0.41	2.95238	gb|ACH70961.1|	phosducin-like 3-1 [Salmo salar]_x0001_gb|ACI67524.1| Phosducin-like protein 3 [Salmo salar]_x0001_gb|ACN10227.1| Phosducin-like protein 3 [Salmo salar]_x0001_gb|ACN12582.1| Phosducin-like protein 3 [Salmo salar]
CX141670.p.om.7	13	0.62	0.21	0.41	2.95238	ref|NP_001133257.1|	Nicotinamide mononucleotide adenylyltransferase 1 [Salmo salar]_x0001_gb|ACI32913.1| Nicotinamide mononucleotide adenylyltransferase 1 [Salmo salar]
CF753024.p.om.7	13	0.59	0.2	0.39	2.95	ref|NP_001133765.1|	Mixed lineage kinase domain-like protein [Salmo salar]_x0001_gb|ACI33860.1| Mixed lineage kinase domain-like protein [Salmo salar]
BX305029.p.om.7	13	0.56	0.19	0.37	2.94737	ref|NP_001133830.1|	Fucose-1-phosphate guanylyltransferase [Salmo salar]_x0001_gb|ACI33978.1| Fucose-1-phosphate guanylyltransferase [Salmo salar]
BX305580.p.om.7	22	0.53	0.18	0.36	2.94444	emb|AL359713.25|	Human DNA sequence from clone RP11-95P3 on chromosome 6 Contains the 5' end of the RU2 gene, the MRS2L gene for MRS2-like magensium homeostasis factor, the 3' end of the GPLD1 gene for glycosylphosphatidylinositol specific phospholipase D1 and two CpG islands, complete sequence
BX299435.p.om.7	69	2.65	0.9	1.75	2.94444	ref|NP_998081.1|	p66 alpha [Danio rerio]_x0001_gb|AAH67707.1| GATA zinc finger domain containing 2A [Danio rerio]
CX039366.p.om.7	26	1.59	0.54	1.05	2.94444	ref|NP_998589.2|	histone H4 transcription factor [Danio rerio]_x0001_gb|AAT68032.1| MBD2-interacting zinc finger [Danio rerio]
CA384620.p.om.7	43	3.62	1.23	2.38	2.94309	ref|NP_001098249.1|	autophagy protein 9 [Oryzias latipes]_x0001_emb|CAJ30209.1| autophagy protein 9 [Oryzias latipes]
BX076278.p.om.7	43	1.88	0.64	1.24	2.9375	ref|NP_938170.1|	pre-mRNA-processing factor 40 homolog A [Danio rerio]_x0001_gb|AAH49307.1| PRP40 pre-mRNA processing factor 40 homolog A (yeast) [Danio rerio]_x0001_emb|CAQ13743.1| PRP40 pre-mRNA processing factor 40 homolog A (yeast) [Danio rerio]
BX884598.p.om.7	13	0.47	0.16	0.31	2.9375	gb|ABQ59677.1|	Pit54 [Salmo salar]_x0001_gb|ACX35595.1| PIT54 [Salmo salar]
DQ091773.p.om.7	43	1.35	0.46	0.89	2.93478	gb|AAS93691.1|	MHC class Ib antigen [Oncorhynchus mykiss]
BX880670.p.om.7	56	3.05	1.04	2.01	2.93269	ref|NP_956598.1|	serine-threonine kinase receptor-associated protein [Danio rerio]_x0001_gb|AAH49525.1| Serine/threonine kinase receptor associated protein [Danio rerio]_x0001_gb|AAH65428.1| Serine/threonine kinase receptor associated protein [Danio rerio]_x0001_emb|CAI20638.1| serine/threonine kinase receptor associated protein [Danio rerio]
CA361424.p.om.7	69	1.29	0.44	0.85	2.93182	ref|NP_001035542.1|	RUN and FYVE domain-containing protein 1 isoform b [Homo sapiens]_x0001_ref|NP_001035541.1| RUN and FYVE domain-containing protein 1 isoform b [Homo sapiens]_x0001_gb|AAK50771.1|AF361055_1 RUFY1 [Homo sapiens]_x0001_gb|AAH32571.1| RUN and FYVE domain containing 1 [Homo sapiens]
BX884423.p.om.7	26	1.17	0.4	0.78	2.925	ref|NP_956876.1|	thyroid receptor-interacting protein 13 [Danio rerio]_x0001_gb|AAH56713.1| Thyroid hormone receptor interactor 13 [Danio rerio]
CU074638.p.om.7	30	1.87	0.64	1.23	2.92188	gb|AAI24796.2|	Si:ch211-195b13.1 [Danio rerio]
CA365103.p.om.7	129	5.96	2.04	3.93	2.92157	gb|EAW77561.1|	ring finger protein 111, isoform CRA_f [Homo sapiens]
CA345944.p.om.7	30	1.46	0.5	0.96	2.92	ref|NP_001139908.1|	neuroblastoma suppressor of tumorigenicity 1 [Salmo salar]_x0001_gb|ACM08606.1| Neuroblastoma suppressor of tumorigenicity 1 precursor [Salmo salar]
BX082398.p.om.7	30	1.43	0.49	0.94	2.91837	gb|ACH70720.1|	stress-induced-phosphoprotein 1 (Hsp70/Hsp90-organizing) [Salmo salar]
CR362204.p.om.7	317	15.42	5.29	10.13	2.91493	ref|NP_989293.1|	far upstream element (FUSE) binding protein 1 [Xenopus (Silurana) tropicalis]_x0001_gb|AAH63902.1| far upstream element (FUSE) binding protein 1 [Xenopus (Silurana) tropicalis]
BX872026.p.om.7	13	0.64	0.22	0.42	2.90909	ref|NP_001103497.1|	mannosidase, alpha, class 2A, member 1 [Danio rerio]_x0001_gb|AAI53981.1| Man2a1 protein [Danio rerio]
BX909049.p.om.7	30	1.6	0.55	1.05	2.90909	ref|NP_001133380.1|	Double-strand break repair protein MRE11A [Salmo salar]_x0001_gb|ACI33122.1| Double-strand break repair protein MRE11A [Salmo salar]
CA364645.p.om.7	13	0.64	0.22	0.42	2.90909	ref|NP_001135154.1|	testis enhanced gene transcript (BAX inhibitor 1) [Salmo salar]_x0001_gb|ACH70693.1| testis enhanced gene transcript (BAX inhibitor 1) [Salmo salar]
BX295489.p.om.7	30	0.93	0.32	0.61	2.90625	gb|ACI69167.1|	Cell division control protein 42 homolog precursor [Salmo salar]
BX085539.p.om.7	81	3.54	1.22	2.32	2.90164	ref|NP_001004511.1|	zinc finger protein 384 like [Danio rerio]_x0001_emb|CAD60637.1| novel zinc finger protein (5 domains) [Danio rerio]
BX083348.p.om.7	13	0.29	0.1	0.2	2.9	gb|AAI63491.1|	Daam1l protein [Danio rerio]
BX886331.p.om.7	13	0.58	0.2	0.38	2.9	gb|ACO52040.1|	Mitochondrial inner membrane protease subunit 2 [Rana catesbeiana]
CR376538.p.om.7	239	10.41	3.59	6.82	2.89972	gb|ACM08707.1|	Ubiquitin-conjugating enzyme E2 D2 [Salmo salar]
GE823629.p.om.7	30	1.97	0.68	1.3	2.89706	gb|ACQ58397.1|	Nascent polypeptide-associated complex subunit alpha [Anoplopoma fimbria]
BX307396.p.om.7	17	1.1	0.38	0.72	2.89474	ref|NP_001133105.1|	upstream transcription factor 1 [Salmo salar]_x0001_gb|ACH70697.1| upstream transcription factor 1 [Salmo salar]
DV200649.p.om.7	64	7.41	2.56	4.86	2.89453	gb|ACN11293.1|	Splicing factor, arginine/serine-rich 16 [Salmo salar]
CA354056.p.om.7	102	5.78	2	3.78	2.89	gb|EDK99169.1|	cytotoxic granule-associated RNA binding protein 1, isoform CRA_c [Mus musculus]
BX082702.p.om.7	21	1.04	0.36	0.67	2.88889	ref|NP_001135046.1|	replication factor C subunit 5 [Salmo salar]_x0001_gb|ACI69994.1| Replication factor C subunit 5 [Salmo salar]
CA383089.p.om.7	17	0.26	0.09	0.17	2.88889	ref|NP_001117976.1|	neutrophil cytosolic factor 2 [Oncorhynchus mykiss]_x0001_gb|AAU04545.1| neutrophil cytosolic factor 2 [Oncorhynchus mykiss]_x0001_dbj|BAD60783.1| NADPH oxidase cytosolic protein p67phox [Oncorhynchus mykiss]
CT962630.p.om.7	51	2.57	0.89	1.68	2.88764	ref|NP_001107562.1|	ephexin-1 isoform 2 [Homo sapiens]
CA382960.p.om.7	34	2.77	0.96	1.81	2.88542	gb|ABP65284.1|	ugly duckling [Danio rerio]
CA387796.p.om.7	89	3.86	1.34	2.52	2.8806	gb|ACO11188.1|	Mitochondrial 39S ribosomal protein L3 [Caligus rogercresseyi]
BX911412.p.om.7	17	0.72	0.25	0.47	2.88	ref|NP_001133826.1|	Lysosomal-associated transmembrane protein 4A [Salmo salar]_x0001_gb|ACI33967.1| Lysosomal-associated transmembrane protein 4A [Salmo salar]
BX306307.p.om.7	42	0.69	0.24	0.45	2.875	gb|ACB45667.1|	mitochondrial solute carrier family 25 member 25 isoform A [Osmerus mordax]
BX888889.p.om.7	21	0.92	0.32	0.6	2.875	emb|CAP17279.1|	suppressor of cytokine signaling 7 [Oncorhynchus mykiss]
CU066988.p.om.7	34	2.53	0.88	1.65	2.875	gb|AAI66040.1|	Citrate synthase [Danio rerio]
CA352530.p.om.7	93	2.5	0.87	1.63	2.87356	gb|ACI32963.1|	Cytochrome P450 20A1 [Salmo salar]
CA378797.p.om.7	34	2.01	0.7	1.31	2.87143	ref|NM_001081080.1|	Mus musculus PHD finger protein 3 (Phf3), mRNA
BX890289.p.om.7	51	2.67	0.93	1.75	2.87097	ref|NM_001032629.1|	Takifugu rubripes SMC5 protein (smc5), mRNA_x0001_emb|AJ543329.1| Takifugu rubripes mRNA for SMC5 protein
BX083240.p.om.7	4	0.2	0.07	0.12	2.85714	ref|NP_001134912.1|	Eukaryotic translation initiation factor 4E-1A-binding protein [Salmo salar]_x0001_gb|ACI69440.1| Eukaryotic translation initiation factor 4E-1A-binding protein [Salmo salar]
BX864792.p.om.7	17	0.8	0.28	0.52	2.85714	ref|NP_001139843.1|	Endoplasmic reticulum resident protein ERp27 [Salmo salar]_x0001_gb|ACM08296.1| Endoplasmic reticulum resident protein ERp27 precursor [Salmo salar]
BX879658.p.om.7	4	0.2	0.07	0.12	2.85714	ref|NP_001128156.1|	low-density lipoprotein receptor-related protein 6 [Danio rerio]_x0001_gb|ACB38032.1| low density lipoprotein receptor-related protein 6 [Danio rerio]
CA354750.p.om.7	8	0.2	0.07	0.12	2.85714	ref|NP_001134536.1|	Argininosuccinate synthase [Salmo salar]_x0001_gb|ACI67919.1| Argininosuccinate synthase [Salmo salar]
CA354763.p.om.7	4	0.2	0.07	0.12	2.85714	gb|ABF22473.1|	oxysterol-binding protein-like protein 3 [Takifugu rubripes]
CA358741.p.om.7	4	0.2	0.07	0.12	2.85714	ref|NM_005467.3|	Homo sapiens N-acetylated alpha-linked acidic dipeptidase 2 (NAALAD2), mRNA
CA369259.p.om.7	4	0.2	0.07	0.12	2.85714	gb|AAI44514.1|	PTPRK protein [Homo sapiens]
GE822417.p.om.7	21	1.2	0.42	0.78	2.85714	gb|FJ436712.1|	Uronema marinum PPTN-related transposon 5, complete sequence
BX859095.p.om.7	38	1.77	0.62	1.15	2.85484	ref|NP_001087074.1|	DNA-directed DNA polymerase eta [Xenopus laevis]_x0001_gb|AAH77989.1| Polh-prov protein [Xenopus laevis]
BX315148.p.om.7	17	0.77	0.27	0.5	2.85185	gb|ACO09588.1|	B-cell receptor-associated protein 29 [Osmerus mordax]
CA359449.p.om.7	25	0.77	0.27	0.5	2.85185	gb|AAH20479.1|	AKT3 protein [Homo sapiens]
CF752433.p.om.7	17	0.77	0.27	0.5	2.85185	gb|EDL94165.1|	PX domain containing serine/threonine kinase [Rattus norvegicus]
CA344444.p.om.7	25	1.31	0.46	0.84	2.84783	ref|NP_571748.2|	transcription elongation factor SPT5 [Danio rerio]
CA379275.p.om.7	55	1.68	0.59	1.1	2.84746	gb|AAS83204.1|	reverse transcriptase [Fundulus heteroclitus]
CA380212.p.om.7	63	3.73	1.31	2.41	2.84733	gb|ACI33077.1|	Immunoglobulin G-binding protein A precursor [Salmo salar]
BX299311.p.om.7	80	2.59	0.91	1.68	2.84615	gb|ACN10847.1|	phosphatase 1K, mitochondrial precursor [Salmo salar]
CA360677.p.om.7	21	5.49	1.93	3.55	2.84456	gb|ACN10606.1|	NADP-dependent malic enzyme, mitochondrial precursor [Salmo salar]
BX072868.p.om.7	21	0.91	0.32	0.59	2.84375	ref|NP_001134072.1|	ADP-ribosylation factor-like protein 4D [Salmo salar]_x0001_gb|ACI66127.1| ADP-ribosylation factor-like protein 4D [Salmo salar]
CX257067.p.om.7	17	0.91	0.32	0.6	2.84375	ref|NM_138756.4|	Mus musculus solute carrier family 25, member 36 (Slc25a36), mRNA
GE836483.p.om.7	38	1.62	0.57	1.06	2.84211	ref|NP_001167238.1|	Sorting nexin-18 [Salmo salar]_x0001_gb|ACN11167.1| Sorting nexin-18 [Salmo salar]
BX077544.p.om.7	17	0.71	0.25	0.46	2.84	gb|ACN10094.1|	ADRM1 [Salmo salar]_x0001_gb|ACN12442.1| ADRM1 [Salmo salar]
BX307552.p.om.7	21	0.88	0.31	0.57	2.83871	ref|NP_001133397.1|	Retrovirus-related Pol polyprotein from transposon 17.6 [Salmo salar]_x0001_gb|ACI33159.1| Retrovirus-related Pol polyprotein from transposon 17.6 [Salmo salar]
CA349277.p.om.7	25	1.05	0.37	0.68	2.83784	ref|NP_001140083.1|	FAD synthetase [Salmo salar]_x0001_gb|ACM09573.1| FAD synthetase [Salmo salar]
BX299385.p.om.7	21	1.39	0.49	0.9	2.83673	ref|NP_001007766.1|	NADH-ubiquinone oxidoreductase 75 kDa subunit, mitochondrial [Danio rerio]_x0001_gb|AAH85651.1| NADH dehydrogenase (ubiquinone) Fe-S protein 1 [Danio rerio]
BE859128.p.om.7	4	0.17	0.06	0.11	2.83333	emb|CAE18161.1|	angiotensinogen precursor [Oncorhynchus mykiss]
BX079512.p.om.7	4	0.17	0.06	0.1	2.83333	gb|DQ246664.1|	Oncorhynchus mykiss SYPG1 (SYPG1), PHF1 (PHF1), and RGL2 (RGL2) genes, complete cds; DNaseII pseudogene, complete sequence; LGN-like, PBX2 (PBX2), NOTCH-like, TAP1 (TAP1), and BRD2 (BRD2) genes, complete cds; and MHCII-alpha and Raftlin-like pseudogenes, complete sequence
BX081923.p.om.7	4	0.17	0.06	0.11	2.83333	emb|CAQ14367.1|	finTRIM family protein [Danio rerio]
BX084749.p.om.7	4	0.17	0.06	0.11	2.83333	ref|NP_001002198.1|	BTB (POZ) domain containing 9 [Danio rerio]_x0001_gb|AAH74031.1| BTB (POZ) domain containing 9 [Danio rerio]
BX304838.p.om.7	4	0.17	0.06	0.11	2.83333	ref|NP_001102943.1|	general transcription factor 3C polypeptide 4 [Rattus norvegicus]_x0001_gb|EDL93396.1| rCG45636 [Rattus norvegicus]
BX307156.p.om.7	4	0.17	0.06	0.1	2.83333	ref|NP_001030498.2|	BTB/POZ domain-containing protein KCTD11 [Bos taurus]_x0001_gb|DAA18875.1| BTB/POZ domain-containing protein KCTD11 [Bos taurus]
BX314732.p.om.7	4	0.17	0.06	0.1	2.83333	ref|NP_001133935.1|	Alpha-1,6-mannosyl-glycoprotein 2-beta-N-acetylglucosaminyltransferase [Salmo salar]_x0001_gb|ACI34169.1| Alpha-1,6-mannosyl-glycoprotein 2-beta-N-acetylglucosaminyltransferase [Salmo salar]
BX315565.p.om.7	4	0.17	0.06	0.11	2.83333	ref|NR_030710.1|	Mus musculus regulator of telomere elongation helicase 1 (Rtel1), transcript variant 6, non-coding RNA
BX317646.p.om.7	4	0.17	0.06	0.1	2.83333	gb|ACM08302.1|	lymphocyte G0/G1 switch protein 2 [Salmo salar]
BX320058.p.om.7	4	0.17	0.06	0.1	2.83333	ref|NM_001086956.1|	Xenopus laevis MAP/microtubule affinity-regulating kinase 2 (mark2), mRNA_x0001_dbj|AB071963.1| Xenopus laevis MARK2 mRNA for serine/threonine kinase, complete cds
BX321056.p.om.7	4	0.17	0.06	0.1	2.83333	gb|AAH37729.1|	Gpd1l protein [Mus musculus]
BX321511.p.om.7	4	0.17	0.06	0.11	2.83333	ref|NP_001133276.1|	NG,NG-dimethylarginine dimethylaminohydrolase 2 [Salmo salar]_x0001_gb|ACI32948.1| NG,NG-dimethylarginine dimethylaminohydrolase 2 [Salmo salar]
BX864674.p.om.7	4	0.17	0.06	0.11	2.83333	ref|NP_001080241.1|	hippocampus abundant transcript 1 [Xenopus laevis]_x0001_gb|AAH46748.1| Hiat1-prov protein [Xenopus laevis]
BX868836.p.om.7	4	0.17	0.06	0.1	2.83333	ref|NP_001133389.1|	NOP14 nucleolar protein homolog [Salmo salar]_x0001_gb|ACI33141.1| Nucleolar protein 14 [Salmo salar]_x0001_gb|ACN10879.1| Nucleolar protein 14 [Salmo salar]
BX885905.p.om.7	4	0.17	0.06	0.1	2.83333	ref|NP_035708.2|	transforming growth factor beta receptor type 3 precursor [Mus musculus]_x0001_gb|AAH70428.1| Transforming growth factor, beta receptor III [Mus musculus]_x0001_gb|EDL20169.1| transforming growth factor, beta receptor III [Mus musculus]
CA341732.p.om.7	4	0.17	0.06	0.11	2.83333	ref|NP_956167.1|	probable D-lactate dehydrogenase, mitochondrial [Danio rerio]_x0001_gb|AAH44171.1| Lactate dehydrogenase D [Danio rerio]
CA358322.p.om.7	17	0.51	0.18	0.33	2.83333	gb|ACN10336.1|	Phosphate carrier protein, mitochondrial precursor [Salmo salar]_x0001_gb|ACN12696.1| Phosphate carrier protein, mitochondrial precursor [Salmo salar]
CA364327.p.om.7	4	0.17	0.06	0.11	2.83333	emb|CAG12531.1|	unnamed protein product [Tetraodon nigroviridis]
CB490142.p.om.7	4	0.17	0.06	0.11	2.83333	dbj|BAA85038.1|	alpha-2-macroglobulin-1 [Cyprinus carpio]
CR373359.p.om.7	4	0.17	0.06	0.11	2.83333	gb|ACI66682.1|	Deoxycytidylate deaminase [Salmo salar]_x0001_gb|ACI68489.1| Deoxycytidylate deaminase [Salmo salar]
CU067235.p.om.7	4	0.17	0.06	0.1	2.83333	gb|AAI63094.1|	Activating transcription factor 7a [Danio rerio]
CA351289.p.om.7	92	2.86	1.01	1.85	2.83168	ref|NP_001034286.1|	torsin-1B [Rattus norvegicus]_x0001_gb|AAI11705.1| Torsin family 1, member B [Rattus norvegicus]_x0001_gb|EDL93287.1| rCG45853 [Rattus norvegicus]
BX088258.p.om.7	138	6.85	2.42	4.42	2.83058	ref|NP_001005621.1|	RAB3D, member RAS oncogene family [Xenopus (Silurana) tropicalis]_x0001_gb|AAH74589.1| RAB3D, member RAS oncogene family [Xenopus (Silurana) tropicalis]
CR369744.p.om.7	46	1.98	0.7	1.28	2.82857	emb|CAQ13402.1|	CUG triplet repeat, RNA binding protein 2 [Danio rerio]
BX317420.p.om.7	17	0.82	0.29	0.54	2.82759	gb|AAI55157.1|	Ube3a protein [Danio rerio]
CA344686.p.om.7	46	9.16	3.24	5.92	2.82716	ref|NP_001133281.1|	Dual specificity mitogen-activated protein kinase kinase 2 [Salmo salar]_x0001_gb|ACI32964.1| Dual specificity mitogen-activated protein kinase kinase 2 [Salmo salar]
BX867423.p.om.7	25	1.13	0.4	0.73	2.825	gb|ACN11335.1|	Peroxisomal 3,2-trans-enoyl-CoA isomerase [Salmo salar]
CX717828.p.om.7	42	2.26	0.8	1.46	2.825	ref|NP_001017881.1|	sulfide:quinone oxidoreductase, mitochondrial [Danio rerio]_x0001_gb|AAH93431.1| Sulfide quinone reductase-like (yeast) [Danio rerio]
CR370558.p.om.7	17	0.48	0.17	0.32	2.82353	gb|ACX31196.1|	WNT1 inducible signaling pathway protein 1b [Danio rerio]
CA383261.p.om.7	50	2.96	1.05	1.91	2.81905	ref|NP_571748.2|	transcription elongation factor SPT5 [Danio rerio]
CA360205.p.om.7	25	1.24	0.44	0.8	2.81818	gb|ACO07798.1|	Coatomer subunit zeta-1 [Oncorhynchus mykiss]
BX876449.p.om.7	21	0.76	0.27	0.49	2.81481	ref|NP_001133289.1|	Phenylalanyl-tRNA synthetase beta chain [Salmo salar]_x0001_gb|ACI32979.1| Phenylalanyl-tRNA synthetase beta chain [Salmo salar]
BX302893.p.om.7	29	1.21	0.43	0.78	2.81395	ref|NP_001025296.1|	calcium/calmodulin-dependent protein kinase (CaM kinase) II gamma 1 [Danio rerio]_x0001_gb|AAH96785.1| Calcium/calmodulin-dependent protein kinase (CaM kinase) II gamma 1 [Danio rerio]
CR374664.p.om.7	50	2.53	0.9	1.63	2.81111	ref|NP_001135338.1|	Tumor necrosis factor receptor superfamily member 14 [Salmo salar]_x0001_gb|ACI67993.1| Tumor necrosis factor receptor superfamily member 14 precursor [Salmo salar]
DV194784.p.om.7	79	9.38	3.34	6.03	2.80838	ref|NP_997179.1|	muscleblind-like protein 1 isoform f [Homo sapiens]
BX075376.p.om.7	29	1.15	0.41	0.74	2.80488	gb|ACO13191.1|	Programmed cell death protein 6 [Esox lucius]
CR369642.p.om.7	54	2.44	0.87	1.57	2.8046	ref|NP_001100917.2|	RAB11 family interacting protein 2 [Rattus norvegicus]_x0001_gb|EDL94565.1| RAB11 family interacting protein 2 (class I) (predicted), isoform CRA_a [Rattus norvegicus]
BX874533.p.om.7	50	2.27	0.81	1.46	2.80247	gb|EDL95639.1|	rCG58137, isoform CRA_c [Rattus norvegicus]
AB255034.p.om.7	4	0.14	0.05	0.09	2.8	gb|ACU42261.1|	olfactory receptor family C subfamily 300 member 1 [Oncorhynchus kisutch]
AF421883.p.om.7	12	0.14	0.05	0.09	2.8	ref|NP_001117790.1|	hyperpolarization-activated cyclic nucleotide-gated cation channel 1 [Oncorhynchus mykiss]_x0001_gb|AAQ04053.1|AF421883_1 hyperpolarization-activated cyclic nucleotide-gated cation channel 1 [Oncorhynchus mykiss]
AJ315139.p.om.7	4	0.14	0.05	0.09	2.8	ref|NP_001135255.1|	60S ribosomal protein L4-A [Salmo salar]_x0001_gb|ACI33937.1| 60S ribosomal protein L4-A [Salmo salar]_x0001_gb|ACM08761.1| 60S ribosomal protein L4-A [Salmo salar]
BX088003.p.om.7	4	0.14	0.05	0.09	2.8	ref|NP_001103159.1|	zinc finger protein 250 isoform b [Homo sapiens]_x0001_gb|EAW82029.1| zinc finger protein 250, isoform CRA_a [Homo sapiens]_x0001_gb|EAW82030.1| zinc finger protein 250, isoform CRA_a [Homo sapiens]_x0001_dbj|BAG10595.1| zinc finger protein 250 [synthetic construct]
BX295273.p.om.7	4	0.14	0.05	0.09	2.8	gb|AAI63491.1|	Daam1l protein [Danio rerio]
BX309055.p.om.7	4	0.14	0.05	0.09	2.8	gb|EAW72577.1|	zinc finger protein 497, isoform CRA_a [Homo sapiens]
BX310018.p.om.7	4	0.14	0.05	0.09	2.8	gb|EAW63188.1|	farnesyltransferase, CAAX box, alpha, isoform CRA_a [Homo sapiens]_x0001_gb|EAW63190.1| farnesyltransferase, CAAX box, alpha, isoform CRA_a [Homo sapiens]
BX313550.p.om.7	4	0.14	0.05	0.09	2.8	gb|ACI33649.1|	Dihydroorotate dehydrogenase, mitochondrial precursor [Salmo salar]
BX884592.p.om.7	4	0.14	0.05	0.09	2.8	emb|CAI13924.1|	sarcoglycan, gamma (35kDa dystrophin-associated glycoprotein) [Homo sapiens]_x0001_emb|CAI16544.1| sarcoglycan, gamma (35kDa dystrophin-associated glycoprotein) [Homo sapiens]_x0001_emb|CAI16053.1| sarcoglycan, gamma (35kDa dystrophin-associated glycoprotein) [Homo sapiens]
CA349500.p.om.7	9	0.14	0.05	0.1	2.8	ref|NP_001133924.1|	Claudin-6 [Salmo salar]_x0001_tpg|DAA06170.1| TPA_exp: claudin 31 [Salmo salar]_x0001_gb|ACI34148.1| Claudin-6 [Salmo salar]_x0001_gb|ACM08968.1| Claudin-6 [Salmo salar]
CA361232.p.om.7	4	0.14	0.05	0.09	2.8	ref|NP_997730.1|	dual specificity protein phosphatase 5 [Danio rerio]_x0001_gb|AAH59592.1| Dual specificity phosphatase 5 [Danio rerio]_x0001_emb|CAK10873.1| dual specificity phosphatase 5 [Danio rerio]_x0001_emb|CAK04292.1| dual specificity phosphatase 5 [Danio rerio]
CX255912.p.om.7	4	0.14	0.05	0.09	2.8	gb|ABU41003.1|	transforming growth factor beta 2 [Anser anser]
GE834113.p.om.7	4	0.14	0.05	0.09	2.8	ref|NP_001080808.1|	calpain 5 [Xenopus laevis]_x0001_gb|AAH48218.1| Capn5-prov protein [Xenopus laevis]
CX031947.p.om.7	112	5.59	2	3.59	2.795	gb|EDK99169.1|	cytotoxic granule-associated RNA binding protein 1, isoform CRA_c [Mus musculus]
BX312104.p.om.7	25	1.09	0.39	0.7	2.79487	ref|NP_001140113.1|	otubain 1 [Salmo salar]_x0001_gb|ACM09775.1| Ubiquitin thioesterase OTUB1 [Salmo salar]
CA348949.p.om.7	25	1.09	0.39	0.7	2.79487	ref|NM_001107922.2|	Rattus norvegicus peptidase M20 domain containing 2 (Pm20d2), mRNA
CA387629.p.om.7	87	4.22	1.51	2.71	2.7947	gb|ACO09773.1|	Mitochondrial uncoupling protein 2 [Osmerus mordax]
CA350827.p.om.7	54	3.35	1.2	2.15	2.79167	ref|NP_001135270.1|	Geranylgeranyl transferase type-2 subunit alpha [Salmo salar]_x0001_gb|ACI34098.1| Geranylgeranyl transferase type-2 subunit alpha [Salmo salar]
CX030529.p.om.7	62	3.35	1.2	2.14	2.79167	gb|AAH71396.1|	Safb protein [Danio rerio]
CA379313.p.om.7	79	1.73	0.62	1.11	2.79032	ref|NP_001134027.1|	DNA repair protein RAD51 homolog A [Salmo salar]_x0001_gb|ACI34337.1| DNA repair protein RAD51 homolog A [Salmo salar]
CA373341.p.om.7	8	0.39	0.14	0.24	2.78571	dbj|BAC16311.1|	Raichu-1011X [synthetic construct]
BX308145.p.om.7	37	1.42	0.51	0.91	2.78431	ref|NP_001133313.1|	F-box only protein 4 [Salmo salar]_x0001_gb|ACI33013.1| F-box only protein 4 [Salmo salar]
CX035534.p.om.7	25	1.28	0.46	0.83	2.78261	gb|ACI66585.1|	Ubiquitin-conjugating enzyme E2 D4 [Salmo salar]_x0001_gb|ACI67077.1| Ubiquitin-conjugating enzyme E2 D4 [Salmo salar]_x0001_gb|ACI69707.1| Ubiquitin-conjugating enzyme E2 D4 [Salmo salar]_x0001_gb|ACO07780.1| Ubiquitin-conjugating enzyme E2 D1 [Oncorhynchus mykiss]_x0001_gb|ACO08184.1| Ubiquitin-conjugating enzyme E2 D1 [Oncorhynchus mykiss]_x0001_gb|ACO08641.1| Ubiquitin-conjugating enzyme E2 D…
BX863926.p.om.7	25	1.14	0.41	0.74	2.78049	emb|CR406758.1|	Gallus gallus finished cDNA, clone ChEST976i1
BX888179.p.om.7	4	0.25	0.09	0.16	2.77778	ref|NP_001086474.1|	polymerase (RNA) III (DNA directed) polypeptide C (62kD) [Xenopus laevis]_x0001_gb|AAH75179.1| Polr3c-prov protein [Xenopus laevis]
CA346230.p.om.7	4	0.25	0.09	0.16	2.77778	gb|EAW63079.1|	mucosa associated lymphoid tissue lymphoma translocation gene 1, isoform CRA_b [Homo sapiens]
CA347081.p.om.7	4	0.25	0.09	0.16	2.77778	gb|AAH77205.1|	Kif21a protein [Xenopus laevis]
CB486040.p.om.7	8	0.25	0.09	0.16	2.77778	ref|NP_001098139.1|	alveolin [Oryzias latipes]_x0001_dbj|BAA90750.1| alveolin [Oryzias latipes]
CX246277.p.om.7	4	0.25	0.09	0.16	2.77778	gb|EDL07767.1|	gem (nuclear organelle) associated protein 5, isoform CRA_b [Mus musculus]
GE837054.p.om.7	8	0.25	0.09	0.15	2.77778	gb|AAH90730.1|	Itga6 protein [Danio rerio]
BX862762.p.om.7	33	1.47	0.53	0.94	2.77358	ref|NP_001133098.1|	conserved oligomeric Golgi complex subunit 2 [Salmo salar]_x0001_gb|ACH70688.1| component of oligomeric golgi complex 2 [Salmo salar]
BX856211.p.om.7	66	3.16	1.14	2.02	2.77193	gb|ACO13985.1|	Ubiquitin-conjugating enzyme E2 E2 [Esox lucius]
BX877190.p.om.7	8	0.36	0.13	0.22	2.76923	ref|NP_001133868.1|	TRM61 protein [Salmo salar]_x0001_gb|ACI34049.1| tRNA [Salmo salar]
CA345706.p.om.7	29	0.72	0.26	0.46	2.76923	emb|CAQ14162.1|	novel zinc finger protein [Danio rerio]
CA382766.p.om.7	8	0.36	0.13	0.22	2.76923	gb|EDM16486.1|	kinesin family member 5A [Rattus norvegicus]
BX317494.p.om.7	37	1.77	0.64	1.13	2.76562	ref|NP_001072908.1|	sarcoglycan, gamma (35kDa dystrophin-associated glycoprotein) [Xenopus (Silurana) tropicalis]_x0001_gb|AAI22993.1| gamma sarcoglycan [Xenopus (Silurana) tropicalis]
CA343627.p.om.7	62	2.35	0.85	1.51	2.76471	gb|ACI33791.1|	Ras-related C3 botulinum toxin substrate 1 precursor [Salmo salar]_x0001_gb|ACM08920.1| Ras-related C3 botulinum toxin substrate 1 precursor [Salmo salar]_x0001_gb|ACN10463.1| Ras-related C3 botulinum toxin substrate 1 precursor [Salmo salar]
CX029620.p.om.7	33	2.79	1.01	1.78	2.76238	ref|NP_001005395.1|	upstream binding transcription factor, RNA polymerase I [Danio rerio]
BX320388.p.om.7	41	1.93	0.7	1.23	2.75714	gb|EDL19637.1|	MLX interacting protein, isoform CRA_b [Mus musculus]
GE833462.p.om.7	49	2.04	0.74	1.29	2.75676	dbj|BAF37936.1|	Tc1-like transporase [Oncorhynchus mykiss]
CA357262.p.om.7	37	2.01	0.73	1.28	2.75342	ref|NP_001009988.1|	forkhead box O3A [Danio rerio]_x0001_gb|AAH88386.1| Forkhead box O3A [Danio rerio]
BX868910.p.om.7	45	2.12	0.77	1.35	2.75325	ref|NP_001154019.1|	Inosine triphosphate pyrophosphatase [Oncorhynchus mykiss]_x0001_gb|ACO07556.1| Inosine triphosphate pyrophosphatase [Oncorhynchus mykiss]
[truncated: 1,281 more rows]
