# Supplementary material for: RNA-Seq Reveals an Integrated Immune Response in Nucleated Erythrocytes
Source: PLoS One. 2011 Oct 27;6(10):e26998. doi: 10.1371/journal.pone.0026998 (PMC3203173; doi:10.1371/journal.pone.0026998)
Supplement: Table S2 — Results of DESeq analysis on the RNAseq data for poly (I∶C) and control tEC. For “Fold Change,” values of ≥1 indicate contigs for which expression in poly (I∶C)-stimulated tECs were greater than controls, while values of <1 indicate higher expression in control vs poly (I∶C)-stimulated tECs. Annotation of SIGENAE contigs (http://www.sigenae.org/) was performed using a local, custom “Best Blast” program that aligns sequences first by BLASTX against the NCBI nonredundant (nr) protein database, then depending on the BLASTX results, against the NCBI nucleotide (nt) database by BLASTN. (XLS) [file pone.0026998.s006.xls]

## Sheet: Supplemenary Table 2 genes regu
SIGENAE contig ID	Fold Change	Adjusted P value	Blast Type	Contig Length	Hit Accession #	Hit Description	Blast Similarities	Blast E value	Blast Identities
CX136184.p.om.7	0	0.0989262	No Hit Found
CA356104.p.om.7	0.0194915	0.000936457	BLASTX1	778	ref|ZP_03274672.1|	methyltransferase FkbM family [Arthrospira maxima CS-328] gb|EDZ93721.1| methyltransferase FkbM family [Arthrospira maxima CS-328]	135	3e-06	41/177 (23%)
BX876987.p.om.7	0.0221255	0.00349279	BLASTX1	765	ref|NP_957442.1|	mucolipin-2 [Danio rerio] gb|AAH44140.1| Mucolipin 2 [Danio rerio]	694	5e-71	126/178 (70%)
CR372478.p.om.7	0.0438559	0.000395354	BLASTN1	658	gb|U27089.1|SNU27089	Salvelinus namaycush clone SnAluI-13 AluI/RsaI, Type A repetitive element	112	4e-18	74/86 (86%)
CA376723.p.om.7	0.0515649	4.07e-15	BLASTX1	1447	gb|AAI25893.1|	Gsna protein [Danio rerio]	1311	4e-142	262/310 (84%) 82/314 (26%)
CX260260.p.om.7	0.0535379	2.26e-14	BLASTN2	774	gb|EZ884608.1|	TSA: Oncorhynchus mykiss 121274.Onmycontig mRNA sequence	1188	0	594/594 (100%) 31/31 (100%)
CU071280.p.om.7	0.0545762	0.0503909	BLASTX1	1253	gb|ACO08898.1|	U3 small nucleolar RNA-interacting protein 2 [Osmerus mordax]	943	8e-106	178/201 (88%) 24/37 (64%) 20/42 (47%)
CU073702.p.om.7	0.0553969	5.83e-07	BLASTX1	1455	emb|CBN81142.1|	Citron Rho-interacting kinase [Dicentrarchus labrax]	900	5e-155	189/206 (91%) 93/103 (90%) 26/30 (86%)
BX081111.p.om.7	0.0606402	0.0984944	BLASTN2	819	ref|NM_001140402.1|	Salmo salar vacuolar protein sorting 45 homolog (S. cerevisiae) (vps45), mRNA gb|BT045798.1| Salmo salar clone ssal-rgf-531-252 Vacuolar protein sorting-associated protein 45 putative mRNA, complete cds	990	0	575/622 (92%)
BX308249.p.om.7	0.0606402	0.0984944	BLASTX1	908	gb|EDL22763.1|	polynucleotide kinase 3'- phosphatase, isoform CRA_d [Mus musculus]	358	6e-32	75/157 (47%)
BX297931.p.om.7	0.0682202	0.037135	BLASTN2	1108	gb|BT072447.1|	Salmo salar clone ssal-rgf-525-343 Ubiquilin-4 putative mRNA, pseudogene cds	1290	0	777/852 (91%)
CA363065.p.om.7	0.0744221	0.0159464	BLASTN1	1668	ref|XM_003014041.1|	Arthroderma benhamiae CBS 112371 PE repeat family protein, mRNA	82	1e-09	165/249 (66%) 142/211 (67%) 101/148 (68%) 145/221 (65%) 120/182 (65%) 123/187 (65%) 170/267 (63%)
CU073532.p.om.7	0.0909603	0.0613463	BLASTX1	1293	gb|ACO09001.1|	Eukaryotic peptide chain release factor subunit 1 [Osmerus mordax]	714	6e-73	144/190 (75%)
CR361779.p.om.7	0.108123	0.0244245	BLASTX1	874	gb|AAP20216.1|	40S ribosomal protein S4 [Pagrus major]	562	9e-66	106/109 (97%) 27/35 (77%)
CA342524.p.om.7	0.112363	0.0306143	BLASTX1	1346	emb|CAN87929.1|	elaC homolog 1 (E. coli) [Danio rerio]	1300	7e-141	262/366 (71%)
GE824150.p.om.7	0.116355	1.82e-05	BLASTX1	787	gb|ADV02377.1|	heat shock cognate 70 kDa protein [Coregonus clupeaformis]	578	1e-57	143/143 (100%)
BX083216.p.om.7	0.117627	3.99e-08	BLASTN1	802	gb|EU481821.1|	Salmo salar physical map contig 483, genomic sequence	150	2e-28	150/200 (75%) 136/205 (66%)
DV190993.p.om.7	0.129559	6.86e-07	BLASTX1	652	gb|ADV02377.1|	heat shock cognate 70 kDa protein [Coregonus clupeaformis]	461	4e-44	87/88 (98%)
BX315865.p.om.7	0.140031	1.82e-05	BLASTX1	649	gb|ACO15454.1|	40S ribosomal protein S11 [Caligus clemensi]	410	2e-76	79/79 (100%) 73/73 (100%)
CR363733.p.om.7	0.154714	8.21e-06	BLASTX1	897	gb|ACN10380.1|	60S ribosomal protein L13a [Salmo salar] gb|ACN12742.1| 60S ribosomal protein L13a [Salmo salar]	675	1e-68	144/179 (80%)
CX141454.p.om.7	0.167846	3.46e-05	BLASTX1	426	gb|ACO08020.1|	Hemoglobin subunit beta-4 [Oncorhynchus mykiss] gb|ACO08038.1| Hemoglobin subunit beta-4 [Oncorhynchus mykiss]	361	7e-33	82/139 (58%)
CA348541.p.om.7	0.177232	0.0273556	BLASTN2	305	gb|EZ764029.1|	TSA: Oncorhynchus mykiss 695.Onmycontig mRNA sequence	452	8e-111	261/284 (91%)
BX307727.p.om.7	0.19413	0.000489729	BLASTN1	822	gb|AY115478.1|	Cyprinus carpio L41 ribosomal protein gene, complete cds	86	5e-11	49/53 (92%)
BX080726.p.om.7	0.206943	0.000759705	BLASTX1	528	gb|EAW89848.1|	ribosomal protein L39, isoform CRA_b [Homo sapiens]	277	5e-23	52/53 (98%)
BX876947.p.om.7	0.208294	0.016054	BLASTX1	762	ref|NP_001167406.1|	Transcription initiation factor IIF subunit beta [Salmo salar] gb|ACN10932.1| Transcription initiation factor IIF subunit beta [Salmo salar]	560	2e-55	105/108 (97%)
BX299418.p.om.7	0.208837	0.0680361	BLASTX1	870	ref|NP_001167300.1|	Tuftelin-interacting protein 11 [Salmo salar] gb|ACN11319.1| Tuftelin-interacting protein 11 [Salmo salar]	946	4e-100	182/195 (93%)
GE823968.p.om.7	0.20925	0.00688905	BLASTX1	746	gb|ACO08400.1|	NADH dehydrogenase flavoprotein 2, mitochondrial precursor [Oncorhynchus mykiss]	1012	6e-108	215/255 (84%)
BX302764.p.om.7	0.210508	0.0640754	BLASTX1	1029	gb|ACO13560.1|	Histone H2AV [Esox lucius]	551	3e-54	111/111 (100%)
CU071663.p.om.7	0.21068	0.0303538	BLASTX1	1363	ref|NP_001167387.1|	OTU domain-containing protein 5 [Salmo salar] gb|ACN11382.1| OTU domain-containing protein 5 [Salmo salar]	907	3e-95	222/268 (82%)
CB489981.p.om.7	0.212847	0.025946	BLASTX1	737	ref|NP_001117980.1|	tissue inhibitor of metalloproteinase 2 [Oncorhynchus mykiss] gb|AAU14867.1| tissue inhibitor of metalloproteinase 2 [Oncorhynchus mykiss] gb|ACI69648.1| Metalloproteinase inhibitor 2 precursor [Salmo salar] gb|ACN10422.1| Metalloproteinase inhibitor 2 precursor [Salmo salar] gb|ACN12788.1| Metalloproteinase inhibitor 2 precursor [Salmo salar]	323	2e-52	63/106 (59%) 52/77 (67%)
BX074041.p.om.7	0.216245	0.0273556	BLASTX1	848	gb|ACM09409.1|	Troponin I, slow skeletal muscle [Salmo salar]	664	2e-67	169/172 (98%)
CA354249.p.om.7	0.219519	0.000936457	BLASTX1	1275	gb|ACI32949.1|	Myeloid-associated differentiation marker [Salmo salar]	271	1e-21	65/69 (94%)
CX244978.p.om.7	0.224656	0.00358992	BLASTN2	382	gb|EZ765602.1|	TSA: Oncorhynchus mykiss 2268.Onmycontig mRNA sequence	534	6e-133	336/378 (88%)
CA360371.p.om.7	0.231816	0.00293614	BLASTN2	206	gb|EZ780823.1|	TSA: Oncorhynchus mykiss 17489.Onmycontig mRNA sequence	70	3e-07	44/50 (88%) 44/50 (88%) 37/41 (90%) 37/41 (90%)
BX311263.p.om.7	0.233189	0.037135	BLASTN1	769	gb|AY739096.1|	Takifugu rubripes frRHCE, frSMP1, frNPD014, and frP29 genes, complete sequence; frRUNX3 (frRUNX3) gene, complete cds; and frCLIC4, frSRRM1, frMTMR9L, frLCK, frHD, and frKCP3 genes, complete sequence	108	5e-17	125/170 (73%) 29/32 (90%)
CX153651.p.om.7	0.240053	0.00339098	BLASTX1	292	ref|NP_001118023.1|	alpha-globin IV [Oncorhynchus mykiss] dbj|BAA13534.1| alpha-globin IV [Oncorhynchus mykiss] gb|ACO07570.1| Hemoglobin subunit alpha-1 [Oncorhynchus mykiss]	200	5e-20	39/49 (79%) 18/22 (81%)
CA384208.p.om.7	0.249456	0.00611943	BLASTN1	704	gb|S70114.1|	cytotoxic granule-associated RNA-binding protein p40-TIA-1 {5' region} [human, leukocytes, Genomic, 1019 nt]	140	1e-25	76/80 (95%)
CR943439.p.om.7	0.276342	0.0569176	BLASTX1	384	gb|ACO07648.1|	Hemoglobin subunit beta-4 [Oncorhynchus mykiss]	294	4e-25	57/57 (100%)
CU069012.p.om.7	0.278687	0.0323526	BLASTX1	831	gb|ACO07463.1|	Acidic leucine-rich nuclear phosphoprotein 32 family member B [Oncorhynchus mykiss]	302	2e-25	63/82 (76%)
CA376615.p.om.7	0.278821	0.0244245	BLASTN1	696	gb|AY386804.1|	Oncorhynchus mykiss isolate BamACG-HpaCGT tissue-specific MS-AFLP genomic fragment	136	1e-24	99/117 (84%)
BX869731.p.om.7	0.296271	0.0929549	BLASTX1	629	gb|ACI69075.1|	60S ribosomal protein L11 [Salmo salar] gb|ACN10061.1| 60S ribosomal protein L11 [Salmo salar] gb|ACN12408.1| 60S ribosomal protein L11 [Salmo salar]	521	4e-51	118/172 (68%)
CR373799.p.om.7	0.300405	0.0560506	BLASTX1	676	ref|NP_001154074.1|	60S ribosomal protein L28 [Oncorhynchus mykiss] gb|ACO07782.1| 60S ribosomal protein L28 [Oncorhynchus mykiss]	542	5e-67	106/107 (99%) 28/28 (100%)
CT563289.p.om.7	0.302844	0.0539087	BLASTN2	100	gb|EZ914098.1|	TSA: Oncorhynchus mykiss 150764.Onmycontig mRNA sequence	190	3e-40	95/95 (100%)
BX875199.p.om.7	3.35724	0.0569176	BLASTX1	2055	gb|ACI34345.1|	CTP synthase 1 [Salmo salar]	907	4e-95	180/223 (80%)
BX308349.p.om.7	3.88855	0.0360868	BLASTN1	741	gb|AY115478.1|	Cyprinus carpio L41 ribosomal protein gene, complete cds	86	5e-11	49/53 (92%)
CX250245.p.om.7	3.94332	0.0354768	BLASTN1	593	gb|U34341.1|OMU34341	Oncorhynchus mykiss 28S ribosomal RNA gene, partial sequence	898	0	457/461 (99%)
CB490841.p.om.7	3.95153	0.0613463	No Hit Found
CR943321.p.om.7	4.13129	0.0569176	BLASTX1	548	gb|ACI66222.1|	NADH dehydrogenase 1 alpha subcomplex subunit 1 [Salmo salar] gb|ACN09884.1| NADH dehydrogenase 1 alpha subcomplex subunit 1 [Salmo salar] gb|ACN12231.1| NADH dehydrogenase 1 alpha subcomplex subunit 1 [Salmo salar]	377	1e-34	70/70 (100%)
CX036936.p.om.7	4.8637	0.0231157	BLASTN1	592	gb|FJ747345.1|	Uncultured fungus clone Aero4_F02 18S ribosomal RNA gene, partial sequence	652	9e-165	326/326 (100%)
CX351480.p.om.7	5.31507	0.000115601	BLASTX1	486	gb|AAF26302.1|AF184617_1	proprotein convertase aPC6C isoform [Branchiostoma californiense]	214	8e-16	43/52 (82%)
CA381287.p.om.7	6.03211	0.016054	BLASTN1	609	dbj|AK304011.1|	Homo sapiens cDNA FLJ55383 complete cds	320	1e-74	294/382 (76%)
GE823850.p.om.7	6.59926	9.08e-06	BLASTX1	807	gb|AAF73821.1|	surface protein PspC [Streptococcus pneumoniae]	210	7e-15	71/250 (28%) 60/230 (26%) 47/181 (25%) 28/135 (20%)
CT563587.p.om.7	7.57245	0.0560506	BLASTX1	1718	emb|CAB07532.1|	c21ORF-HumF09G8.5 [Homo sapiens]	371	5e-33	94/144 (65%)
CU071608.p.om.7	8.00451	0.0244245	BLASTN1	1325	gb|BT072061.1|	Salmo salar clone ssal-rgf-509-332, novel cds	1874	0	1110/1219 (91%)
CX035921.p.om.7	32.7457	0.0306143	BLASTX1	468	emb|CAI20811.1|	lamin B receptor [Danio rerio]	579	4e-58	105/158 (66%)
